# Supplementary material for: Psychological distress and pregnancy outcomes in early-stage gestational hypertension: a case-control study from China
Source: PeerJ journal article supplement (doi:10.7717/peerj.19574), 2025-06-20
Supplement: QuestionnaireChinese.docx [file QuestionnaireChinese.docx]

参与者基本信息、SAS问卷评分和随访信息

# 妊娠期高血压孕妇心理状态评估问卷

（适用于有/无妊娠期高血压的孕妇）

## 一、一般信息

### 您的姓名： ________________

### 您的年龄： ________________

### 联系电话： ________________

### 孕前 BMI（kg/m²）：_________

### 文化程度

□ 高中/中专及以下

□ 大专及以上

### 职业状况

□ 在职

□ 无业

### 是否初产妇

□ 初产

□ 经产

### 合并症

□ 有 （请填写：_______________________________）

□ 无

## 二、妊娠期血压相关信息

### 您是否被诊断为妊娠期高血压？

□ 是

□ 否 （若选“否”，请跳至第 4 题）

### 您是在孕期哪一阶段被诊断的？

□ 早孕

□ 中孕

□ 晚孕

□ 临产前

### 诊断前是否出现过相关症状？

□ 是 （请简述：_______________________________）

□ 否

### 您是否有高血压家族史?

□ 是

□ 否

### 分娩期间您的血压控制情况? （仅限妊娠高血压者）

□ 平稳

□ 波动明显

□ 出现高血压危象

## 三、产前建档与孕期管理

### 您是否按时建档并进行产检?

□ 是

□ 否

### 孕期医生是否针对妊娠期高血压给过专门指导?

□ 是（可多选）

□ 调整饮食

□ 改变生活方式

□ 药物治疗

□ 其 他：________________________

□ 否

□ 未诊断为高血压

## 四、分娩方式与过程（此栏信息为分娩后7日内填写）

### 最终分娩方式

□ 阴道分娩

□ 剖宫产

□ 其他：________

### 分娩过程中是否出现下列并发症（可多选）：

□ 胎膜早破

□ 羊水过多

□ 子痫前期

□ 早产

□ 产后出血

□ 其他： ________________________________

## 五、围产结局（此栏信息为分娩后7日内填写）

### 胎儿窘迫

□ 是

□ 否

### 低出生体重

□ 是

□ 否

### 新生儿感染

□ 是

□ 否

### 巨大儿

□ 是

□ 否

## 六、产后随访（此栏信息为出院时填写或电话随访）

### 产后是否继续监测血压?

□ 是

□ 否

### 产后血压控制情况?

□ 已恢复正常

□ 仍需监测

□ 仍然高

### 是否接受过产后高血压随访服务?

□ 是（如是，请填写满意度）

□ 非常满意

□ 满意

□ 一般

□ 不满意

□ 否

## 七、Zung 焦虑自评量表（SAS）

| 建档登记号： | 年龄： | 登记号：. |
| --- | --- | --- |
| 诊断： | | 日期： |

**填写须知**

请仔细阅读并理解下列每一陈述，然后结合您过去一周的真实感受，在相应方框内标记“√”。

| **序** | **项          目** | **没有/很少** | **有时有** | **大部分时间有** | **绝大部分或全部时间都有** |
| --- | --- | --- | --- | --- | --- |
| 1 | 我比平时更容易紧张和着急 | ☐ | ☐ | ☐ | ☐ |
| 2 | 我无缘无故地感到害怕 | ☐ | ☐ | ☐ | ☐ |
| 3 | 我容易受惊吓或感到恐慌 | ☐ | ☐ | ☐ | ☐ |
| 4 | 我觉得自己好像要崩溃或将要瓦解 | ☐ | ☐ | ☐ | ☐ |
| 5* | 我觉得一切都很好，不会发生什么不好的事 | ☐ | ☐ | ☐ | ☐ |
| 6 | 我的胳膊和腿会发抖颤动 | ☐ | ☐ | ☐ | ☐ |
| 7 | 我因头痛、颈痛和背痛而苦恼 | ☐ | ☐ | ☐ | ☐ |
| 8 | 我觉得虚弱无力、容易疲倦 | ☐ | ☐ | ☐ | ☐ |
| 9* | 我感到心平气和，能安静地坐着 | ☐ | ☐ | ☐ | ☐ |
| 10 | 我能感觉到心脏跳得很快 | ☐ | ☐ | ☐ | ☐ |
| 11 | 我因头晕而苦恼 | ☐ | ☐ | ☐ | ☐ |
| 12 | 我有要昏倒的感觉 | ☐ | ☐ | ☐ | ☐ |
| 13* | 我呼吸自如 | ☐ | ☐ | ☐ | ☐ |
| 14 | 我的手脚发麻、刺痛 | ☐ | ☐ | ☐ | ☐ |
| 15 | 我因胃痛或消化不良而苦恼 | ☐ | ☐ | ☐ | ☐ |
| 16 | 我需要经常小便 | ☐ | ☐ | ☐ | ☐ |
| 17* | 我的手通常是温暖干燥的 | ☐ | ☐ | ☐ | ☐ |
| 18 | 我的脸发红发热 | ☐ | ☐ | ☐ | ☐ |
| 19* | 我容易入睡并睡得很好 | ☐ | ☐ | ☐ | ☐ |
| 20 | 我做恶梦 | ☐ | ☐ | ☐ | ☐ |
|  | **以下栏目医师/研究助理填写 （）** | | | | |
| 1.评分标准：“1”表示没有或很少有；“2”表示有时有；“3”表示大部分时间有；“4”表示绝大部分或全部时间都有。 20个条目中有15项是用负性词陈述的，按上述1～4顺序评分。 其余5项（第5，9，13，17，19）注*号者，是用正性词陈述的，按4～1顺序反向计分。  2.标准分=原始分×1.25，向下取整。 | | | | | |
| 焦虑评估： | | 无 ☐   存在：轻度 ☐  中度 ☐  重度 ☐ | | | |
| 医师/研究助理签名： | | | 日期： | | | |

## 八、体验与建议（此栏信息仅由诊断为妊娠期高血压者在出院时填写或电话随访）

### 您对医院在妊娠期高血压孕妇管理服务方面的满意度如何？

□ 非常满意

□ 满意

□ 一般

□不满意

### 您认为妊娠期高血压的管理和随访在哪些方面最需要改进？

□ 就诊流程

□ 医生沟通与指导

□ 随访频次与质量

□ 其他：________

### 您对妊娠期高血压的管理和随访还有哪些建议或意见？

（请在此处填写）

感谢您抽出宝贵时间参与本次调查！

您的反馈将帮助我们改进服务，为更多孕妇提供更好的医疗保障。
