# Supplementary material for: Psychological distress and pregnancy outcomes in early-stage gestational hypertension: a case-control study from China
Source: PeerJ journal article supplement (doi:10.7717/peerj.19574), 2025-06-20
Supplement: RawData.xlsx [file RawData.xlsx]

## Sheet: Basic Information
			Age			Native Place	Household Registration Type	Education Level	Occupation	Card Registration Date		Last Menstrual Period (LMP)	Expected Due Date (EDD)	Gestational Age at Card Registration	Gravida	Para	Height	Baseline Systolic Blood Pressure	Baseline Diastolic Blood Pressure	Diastolic Blood Pressure	Systolic Blood Pressure	Pre-pregnancy Weight	Recent Medical History	Medication During Pregnancy	Age at Marriage	Age at Menarche	Menstrual Duration (Days)	Menstrual Cycle (Days)	Past Medical History	Other Past Medical History	Family History	Description of Hereditary Diseases in Family	Description of Infectious Diseases in Family	Other Family History	Allergy History	Other Allergy History	Exposure to Toxic Substances	Gestational Weeks with Fever		Disease Diagnosis		Pregnancy Risk Assessment Classification	Husband's Age	Husband's Health Condition	Date of Completion (of the form)
1			36				Foreign Nationality	Junior Secondary Education		2017-07-14	2017-07-14	2017-04-20	2018-01-25	12weeks1days	5	3	160.00	100	60	69	99	55.00			29	13	-	30-	No		No					Chloramphenicol	No	No				Scarred uterus, History of various uterine surgeries （ C-S、 Cornual Pregnancy 、 Uterine Leiomyomas myomectomy等）≥2次	35	Good	2017-07-14
2			36				Non-local Migrant Population	Other Situations		2017-12-26	2017-12-26	2017-09-19	2018-06-26	14weeks						74	122				28	14	3-5	42-	No		No				No		No	No					30		2017-12-26
3			36				Non-local Migrant Population	Other Situations		2018-01-22	2018-01-22	2017-11-16	2018-08-23	9weeks4days	1	0	161.00			63	98	49.50			30	13	-	28-	No		No				No		No	No				Normal	29		2018-01-22
4			35				Non-local Migrant Population	Other Situations		2018-02-11	2018-02-11	2017-12-09	2018-09-15	9weeks1days	1	0	155.00			75	128	45.00			25	14	-	30-	No		No				No		No	No				Normal	37		2018-02-11
5			34			Shanghai	Shanghai	Vocational Secondary Education		2019-04-09	2019-04-09	2019-02-03	2019-11-10	9weeks2days	1	0	158.00			70	117	55.00			30	14	5-7	28-	No		No				No		No	No				BMI≥24,Assisted reproductive pregnancy	31	Good	2019-04-09
6			34			Jiangsu Province	Non-local permanent residents	College Diploma		2019-12-03	2019-12-03	2019-08-08	2020-05-14	16weeks5days	1	0	160.00	98	57	66	123	56.00	Denial of Common Medical History	No,	30	13	3-5	28-	No		No				No		No	0				Ovarian cyst≥5cm	32	Good	2019-12-03
7			31			Guangdong Province	Non-local permanent residents	College Diploma	Office Personnel and Related Workers	2020-01-16	2020-01-16	2019-11-11	2020-08-17	9weeks3days	1	0	153.00			64	139	55.00			27	14	5-7	37-	No		No				No		No	No				Normal	27	Good	2020-01-16
8			33			Shanghai	Shanghai	College Diploma	Unclassified Workers	2020-03-05	2020-03-05	2019-11-23	2020-08-29	14weeks5days	1	0	168.00	114	67	69	118	77.00			28	12	7-10	30-	No			Hypertension			No		No	No				BMI≥24	36	Good	2020-03-05
9			34			Shanghai	Shanghai	Undergraduate degree	Commercial and Service Industry Personnel	2020-03-10	2020-03-10	2019-11-26	2020-09-01	15weeks	1	0	164.00			72	125	55.00	Denial of Common Medical History	No,	31	15	3-5	35-	No		No				No		Alcohol	0				Normal	35	Good	2020-03-10
10			29			Liaoning Province	Non-local permanent residents	Undergraduate degree	Commercial and Service Industry Personnel	2020-03-31	2020-03-31	2020-01-20	2020-10-26	10weeks1days	1	0	163.00			83	126	110.00			25	13	3-5	28-		History of abnormal glucose tolerance and underwent gastric reduction surgery in 2017.					No		No	No				BMI≥28	28	Good	2020-03-31
11			33			Shandong Province	Non-local permanent residents	Undergraduate degree	Commercial and Service Industry Personnel	2020-09-16	2020-09-16	2020-07-20	2021-04-26	8weeks2days	3	0	158.00	110	70	63	109	51.50			29	12	5-7	32-		Postoperative medication for papillary thyroid carcinoma includes taking Euthyrox 2# orally once daily, with follow-up showing normal thyroid function	No				No		No	No		History of thyroid cancer,|Pregnancy history: 3 pregnancies, 0 births, currently at 8 weeks and 2 days gestation.		Thyroid diseases requiring medication treatment	29	Good	2020-09-16
12			29			Fujian Province	Non-local permanent residents	College Diploma	Commercial and Service Industry Personnel	2020-10-30	2020-10-30	2020-08-08	2021-05-15	11weeks6days	2	0	158.00	110	70	68	115	54.00			27	14	5-7	30-	No		No				No		No	No		Routine prenatal care		Normal	30	Good	2020-10-30
13			34			Zhejiang Province	Shanghai	Postgraduate Education	Public Servants	2021-04-14	2021-04-14	2021-02-06	2021-11-13	9weeks4days	1	0	160.00	110	63	67	104	50.00			30	13	5-7	30-	No								No	No		Routine prenatal care		Normal	32	Good	2021-04-14
14			30			Jiangxi Province	Non-local permanent residents	College Diploma		2021-04-15	2021-04-15	2021-01-23	2021-10-30	11weeks5days	1	0	165.00			71	117	54.00			27	14	5-7	30-60		Diagnosed with polycystic ovary syndrome in 2016, no treatment was given, and there was no regular follow-up. In October 2020, insulin resistance was discovered, and metformin 2# was taken orally three times a day. Medication was stopped on April 1, 2021.	No				No		No	No		High-risk pregnancy care,PCOS,Insulin Resistance		2|1.7.7|Other Situations; Other Situations:PCOS、Insulin Resistance	30	Good	2021-04-15
15			43			Anhui Province	Non-local permanent residents	College Diploma	Operational Staff and Associated Individuals	2021-12-21	2021-12-21	2021-10-19	2022-07-26	9weeks	7	3	171.00			55	114	65.00			23	13	7-10	30-		History of neonatal death in 2003					No		No	No		High-risk pregnancy care,Pregnancy Monitoring for Advanced Maternal Age Multiparous Women,Scarred uterus Cesarean section ,Pregnancy surveillance in women with a history of neonatal death,History of multiple miscarriages		Scarred uterus, Various types of miscarriage ≥3次,Adverse obstetric history,Age≥40	43	Good	2021-12-21
16			36			Shanghai	Shanghai	Undergraduate degree	Skilled Professionals	2022-02-25	2022-02-25	2022-05-28	2023-03-04	0days	5	1	160.00			66	122	54.00	Denial of Common Medical History	No,	26	14	3-5	28-	No		0				No		No	0				Age≥35	36	Good	2022-02-25
17			28			Jiangsu Province	Non-local permanent residents	Undergraduate degree	Office Personnel and Related Workers	2022-05-20	2022-05-20	2022-04-07	2023-01-12	6weeks1days			165.00			88	116	52.00			25	14	5-7	25-	No		No				No		No	No		Routine prenatal care		Normal	30	Good	2022-05-20
18			33				Shanghai	Other Situations	Unclassified Workers	2022-05-20	2022-05-20	2022-03-26	2022-12-31	7weeks6days			164.00			55	95	53.00			31	12	7-	30-	No		No				No		No	No		Routine prenatal care		Normal	32		2022-05-20
19			36			Jiangsu Province	Shanghai	Undergraduate degree	Office Personnel and Related Workers	2022-05-20	2022-05-20	2022-04-08	2023-01-13	6weeks	2	1	160.00			60	115	55.00			29	13	3-4	31-	No		No				No		No	No		High-risk pregnancy care,Pregnancy Monitoring for Advanced Maternal Age Multiparous Women,Scarred uterus		Age≥35,Scarred uterus	34	Good	2022-05-20
20			35			Shanxi Province	Shanghai	Other Situations	Skilled Professionals	2022-05-22	2022-05-22	2022-04-02	2023-01-07	7weeks1days	1	0	162.00			70	113	50.00			26	14	5-	27-	No			No	Mother is a hepatitis B virus carrier.	No	No		No	No		Pregnancy complicated by Hepatitis B		Prior pelvic surgery,Hepatitis B virus surface antigen positive and liver function Normal	31	Good	2022-05-22
21			30				Non-local permanent residents	Undergraduate degree	Unclassified Workers	2022-05-22	2022-05-22	2022-04-08	2023-01-13	6weeks2days	1	0	160.00			70	130	56.00			25	15	5-	26-	No		No				No		No	No				Arrhythmia			2022-05-22
22			34			Shanghai	Shanghai	Postgraduate Education	Unclassified Workers	2022-05-24	2022-05-24	2022-03-26	2022-12-31	8weeks3days	2	0	170.50			62	98	54.00			25	12	7-	30-	No						No		No	No		Routine prenatal care		Normal	31	Good	2022-05-24
23			31				Shanghai	Other Situations	Unclassified Workers	2022-05-25	2022-05-25	2022-03-24	2022-12-29	8weeks6days	1	0	167.00			81	120	50.00			26		6-	28-	No						No		No	No				BMI＜18.5	31	Good	2022-05-25
24			30			Zhejiang Province	Shanghai	College Diploma	Office Personnel and Related Workers	2022-05-26	2022-05-26	2022-03-26	2022-12-31	8weeks5days	1	0	165.00			61	98	59.80			29	13	6-	30-	No						No		No	No		Routine prenatal care		Normal	29	Good	2022-05-26
25			37			Hubei Province	Non-local permanent residents	Other Situations	Office Personnel and Related Workers	2022-05-27	2022-05-27	2022-04-05	2023-01-10	7weeks3days	1	0	160.00			69	101	53.00			36	12	7-	30-	No		No				No		No	No		Pregnancy Monitoring for Advanced Maternal Age Primiparous Women		Age≥35	35	Good	2022-05-27
26			33			Fujian Province	Non-local permanent residents	Postgraduate Education	Skilled Professionals	2022-05-27	2022-05-27	2022-03-31	2023-01-05	8weeks1days	1	0	162.50			64	107	62.00			26	14	5-	28-	No		No	No	Mother and younger brother are infected with hepatitis B virus		No		No	No		Hepatitis B surface antigen (HBsAg), hepatitis B e antigen (HBeAg), and anti-hepatitis B core antibody (anti-HBc) positive		Hepatitis B virus surface antigen positive and liver function Normal	30	Good	2022-05-27
27			29				Non-local permanent residents	Undergraduate degree	Unclassified Workers	2022-05-27	2022-05-27	2022-04-04	2023-01-09	7weeks4days	1	0	155.00			83	122	48.00			27	13	5-	28-	No						No		No	No				Normal			2022-05-27
28			29				Shanghai	Other Situations	Unclassified Workers	2022-05-29	2022-05-29	2022-04-02	2023-01-07	8weeks1days	1	0	160.00			69	120	63.00			28	13	4-5	28-	No		No				No		No	No				BMI≥24	29	Good	2022-05-29
29			33				Shanghai	Undergraduate degree	Unclassified Workers	2022-05-29	2022-05-29	2022-03-23	2022-12-28	9weeks4days	2	0	166.00			73	123	59.00	Denial of Common Medical History	ElevitFolic acid、Vitamin E Soft capsule 、Progesterone capsule	31	14	5-	35-	No		0				No		No	No				Normal	35	Good	2022-05-29
30			42				Shanghai	Postgraduate Education	Unclassified Workers	2022-05-30	2022-05-30	2022-04-12	2023-01-17	6weeks6days	4	1	155.00			82	136	68.00			26	12	3-5	30-	No						No		No	No		High-risk pregnancy care,Pregnancy Monitoring for Advanced Maternal Age Multiparous Women,Obesity,Scarred uterus,hypertension		BMI≥28,Age≥40,Scarred uterus,Hypertensive disorders of pregnancy, excluding high-risk (red and orange) categories.			2022-05-30
31			31				Non-local permanent residents	Undergraduate degree	Unclassified Workers	2022-05-30	2022-05-30	2022-03-31	2023-01-05	8weeks4days	3	0	169.00			74	116	52.00			30	14	5-	28-	No		No				No		No	No		High-risk pregnancy care		BMI＜18.5			2022-05-30
32			35			Shanghai	Shanghai	Undergraduate degree	Office Personnel and Related Workers	2022-05-31	2022-05-31	2022-04-14	2023-01-19	6weeks5days	1	0	174.00			71	113	75.00	Denial of Common Medical History	Levothyroxine	32	14	5-	28-	0	Hashimoto's thyroiditis for 2 years, currently taking Euthyrox orally once daily.	0				No		No	No				BMI≥24,Endocrine system diseases	33	Good	2022-05-31
33			32			Hebei Province	Non-local permanent residents	Postgraduate Education	Skilled Professionals	2022-05-31	2022-05-31	2022-04-02	2023-01-07	8weeks3days	1	0	162.00			57	103	50.00			29	15	5-	31-	No		No				No		No	No		Routine prenatal care		Normal	29	Good	2022-05-31
34			28			Shanghai	Shanghai	Undergraduate degree	Unclassified Workers	2022-05-31	2022-05-31	2022-04-01	2023-01-06	8weeks4days	1	0	168.00			78	124	54.00			26	14	4-6	60-		Diagnosed with PCOS for over 10 years, no treatment was given				Father has lung cancer	No		No	No		PCOS,Routine prenatal care		Normal	28	Good	2022-05-31
35			34			Shandong Province	Shanghai	Postgraduate Education	Skilled Professionals	2022-05-31	2022-05-31	2022-04-03	2023-01-08	8weeks2days	2	1	165.00			75	110	48.00	Denial of Common Medical History	No	26	13	5-	30-	No		No				No		No	No				Normal	33	Good	2022-05-31
36			34			Fujian Province	Non-local permanent residents	Postgraduate Education	Skilled Professionals	2022-06-01	2022-06-01	2022-04-13	2023-01-18	7weeks	1	0	164.00			55	99	52.00				13	10-15	28-	No		No	No	No		No		No	No				Normal	31	Good	2022-06-01
37			34			Liaoning Province	Shanghai	Undergraduate degree	Office Personnel and Related Workers	2022-06-02	2022-06-02	2022-04-02	2023-01-07	8weeks5days	3	0	179.00			60	101	80.00			30	13	5-	30-35		Biochemical pregnancy in October 2018							No	No		High-risk pregnancy care：BMI≥24		BMI≥24	37	Good	2022-06-02
38			30				Non-local permanent residents	Other Situations	Unclassified Workers	2022-06-02	2022-06-02	2022-04-13	2023-01-18	7weeks1days	1	0	158.00			75	112	44.00			27	13	5-	28-	No		No				No		No	No		High-risk pregnancy care		BMI＜18.5			2022-06-02
39			31			Tianjin Municipality	Non-local permanent residents	Postgraduate Education	Office Personnel and Related Workers	2022-06-02	2022-06-02	2022-03-28	2023-01-02	9weeks3days	1	0	176.00			88	139	59.00	Denial of Common Medical History	No	27	13	-	35-	No		0	No	No	No	No		No	No		Routine prenatal care		Normal	31	Good	2022-06-02
40			30			Anhui Province	Non-local permanent residents	Undergraduate degree	Unclassified Workers	2022-06-02	2022-06-02	2022-03-24	2022-12-29	10weeks	3	0	164.00			67	111	44.50	Denial of Common Medical History	No	27	15	7-	28-	No		0	No	No	No	No		No	No		High-risk pregnancy care：BMI＜18.5,Pregnancy supervision with a history of embryonic arrest		BMI＜18.5	30	Good	2022-06-02
41			31			Shanghai	Shanghai	Other Situations	Office Personnel and Related Workers	2022-06-03	2022-06-03	2022-04-06	2023-01-11	8weeks2days	2	0	169.00			69	107	55.00				14	7-20	28-35	No		No				No		No	No				Normal	31	Good	2022-06-03
42			32				Shanghai	Other Situations	Unclassified Workers	2022-06-03	2022-06-03	2022-04-16	2023-01-21	6weeks6days			168.00			74	117	55.00			24	14	7-8	30-	No		No				No		No	No				Normal	31	Good	2022-06-03
43			36			Jiangsu Province	Shanghai	College Diploma	Office Personnel and Related Workers	2022-06-03	2022-06-03	2022-03-31	2023-01-05	9weeks1days	1	0	165.00			76	114	79.00			31	12	7-	28-	No		No				No		No	No		Pregnancy Monitoring for Advanced Maternal Age Multiparous Women		Age≥35,BMI≥28	34	Good	2022-06-03
44			32			Jiangsu Province	Shanghai	Postgraduate Education	Office Personnel and Related Workers	2022-06-03	2022-06-03	2022-04-02	2023-01-07	8weeks6days	1	0	157.50			67	111	50.00	Denial of Common Medical History	No	30	14	5-6	28-	0	In 2020, uterine fibroids were found during a physical examination, and no treatment was given during follow-up. In August 2021, an ultrasound at an external hospital indicated multiple fibroids, with the largest measuring 20 x 13 mm	0	No	No	No	No		No	No		Multiple Uterine Leiomyomas,High-risk pregnancy care		2|4|Other Situations Yellow alert classification ;评估Other Situations:多发性Uterine Leiomyomas	27	Good	2022-06-03
45			32			Anhui Province	Non-local permanent residents	Postgraduate Education	Office Personnel and Related Workers	2022-06-05	2022-06-05	2022-04-13	2023-01-18	7weeks4days	1	0	160.00			84	126	48.00			30	12	5-	33-	No		No				No		No	No				Normal	29	Good	2022-06-05
46			30				Non-local permanent residents	Postgraduate Education	Skilled Professionals	2022-06-05	2022-06-05	2022-04-12	2023-01-17	7weeks5days	1	0	158.50			55	103	50.00			28	12	4-6	28-30	No				The male partner is a hepatitis B carrier (claims that DNA testing shows no infectivity).		No		No	No		Routine prenatal care		Normal	33	Good	2022-06-05
47			33			Henan Province	Shanghai	Postgraduate Education	Skilled Professionals	2022-06-05	2022-06-05	2022-04-07	2023-01-12	8weeks3days	2	0	148.00			63	103	45.00			31	12	5-7	35-	No		No	No	No		No		No	No		Routine prenatal care		Normal	34	Good	2022-06-05
48			44			Jiangsu Province	Shanghai	Postgraduate Education	Office Personnel and Related Workers	2022-06-05	2022-06-05	2022-04-08	2023-01-13	8weeks2days	4	1	160.00			58	95	62.50	Denial of Common Medical History	No	27	12	5-	28-	No		0				No		No	No				BMI≥24,Age≥40	43	Good	2022-06-05
49			28				Shanghai	Undergraduate degree	Unclassified Workers	2022-06-05	2022-06-05	2022-04-07	2023-01-12	8weeks3days	1	0	169.00			81	125	69.00	Denial of Common Medical History	No	24	11	6-	30-	No		No				No		No	No		High-risk pregnancy care(BMI≥24)		BMI≥24	27	Good	2022-06-05
50			34			329900000000	Shanghai	College Diploma	Unclassified Workers	2022-06-05	2022-06-05	2022-04-11	2023-01-16	7weeks6days	2	0	163.00			76	126	60.00	Denial of Common Medical History	Dydrogesterone	32	15	5-	28-	No		0	No	No	hypertension	No		No	No		Pregnancy with a history of spontaneous abortion		Normal	33	Good	2022-06-05
51			26			Hubei Province	Shanghai	Postgraduate Education	Unclassified Workers	2022-06-05	2022-06-05	2022-03-28	2023-01-02	9weeks6days	1	0	170.00			66	97	75.00			24	10	4-5	35-		Major Depressive Disorder 2 years，without medication	No				No		No	No				BMI≥24	27	Good	2022-06-05
52			38				Shanghai	Other Situations	Unclassified Workers	2022-06-05	2022-06-05	2022-04-23	2023-01-28	6weeks1days	2	1	162.00			55	99	55.00	Denial of Common Medical History		29	14	6-	28-	No		No				No		No	No				Age≥35	39		2022-06-05
53			33			Shanghai	Shanghai	Undergraduate degree	Office Personnel and Related Workers	2022-06-05	2022-06-05	2022-04-09	2023-01-14	8weeks1days	1	0	158.00			59	110	53.00			29	12	4-	28-	No		No				No		No	No		Routine prenatal care,Uterine Leiomyomas^2cm		Normal	30	Good	2022-06-05
54			31			Jiangxi Province	Shanghai	Postgraduate Education	Unclassified Workers	2022-06-05	2022-06-05	2022-04-05	2023-01-10	8weeks5days	1	0	161.50			83	103	51.00		No	26	13	3-5	28-30	0		No	No	No		No		No	No		Congenital heart disease: post-operative status after patent ductus arteriosus (PDA) closure.		Congenital heart disease: patent ductus arteriosus without pulmonary hypertension.	32	Good	2022-06-05
55			34			Shanghai	Shanghai	Undergraduate degree	Office Personnel and Related Workers	2022-06-05	2022-06-05	2022-04-14	2023-01-19	7weeks3days	1	0	158.00			68	105	50.00			25	13	5-6	30-							No		No	No				Endocrine system diseases			2022-06-05
56			30			Jiangsu Province	Shanghai	Undergraduate degree	Office Personnel and Related Workers	2022-06-05	2022-06-05	2022-04-04	2023-01-09	8weeks6days	1	0	164.00			78	122	65.00			26	14	5-	28-		After medication treatment for gastric ulcer					No		No	No				BMI≥24	30	Good	2022-06-05
57			32				Shanghai	College Diploma	Unclassified Workers	2022-06-05	2022-06-05	2022-04-07	2023-01-12	8weeks3days	2	0	155.00			66	104	57.00			30	16	4-6	40-50	No						No		No	No		Pregnancy with a history of spontaneous abortion		Normal	35	Good	2022-06-05
58			37			Zhejiang Province	Shanghai	Postgraduate Education	Skilled Professionals	2022-06-06	2022-06-06	2022-04-09	2023-01-14	8weeks2days	1	0	164.00			64	115	52.00			35	13	7-	25-	No						No		No	No				Age≥35	37	Good	2022-06-06
59			32			Zhejiang Province	Shanghai	Postgraduate Education	Unclassified Workers	2022-06-06	2022-06-06	2022-04-09	2023-01-14	8weeks2days	2	0	168.50			70	134	80.00	Denial of Common Medical History		24	14	9-	28-	0	Asthma, manageable; reports high blood pressure for over 10 years.	0				0		No	No		High-risk pregnancy care：BMI≥28,Pregnancy with a history of spontaneous abortion, Asthma.,Pregnancy complicated by chronic hypertensionpossible		Respiratory system diseases ,BMI≥28	33	Good	2022-06-06
60			35			Jiangsu Province	Shanghai	Undergraduate degree	Office Personnel and Related Workers	2022-06-07	2022-06-07	2022-04-04	2023-01-09	9weeks1days	3	0	171.00			70	108	64.50	Denial of Common Medical History	Symbicort Turbuhaler	34	14	5-6	28-	0		0			Both parents have an allergic constitution	No		No	No		High-risk pregnancy care,Personal history of respiratory disease,Pregnancy with ovarian cyst		Prior pelvic surgery,Ovarian cyst≥5cm	34	Good	2022-06-07
61			28			Anhui Province	Non-local permanent residents	Undergraduate degree	Unclassified Workers	2022-06-07	2022-06-07	2022-04-04	2023-01-09	9weeks1days	1	0	158.00			49	92	43.70			27	14	7-	28-30	No		No	No	No		No		No	No		High-risk pregnancy careBMI＜18.5,bradycardia		BMI＜18.5	32	Good	2022-06-07
62			40			Shanghai	Shanghai	Undergraduate degree	Unclassified Workers	2022-06-07	2022-06-07	2022-04-05	2023-01-10	9weeks	4	1	175.00			67	111	68.00			38	14	6-	28-30	No			No	No	No			No	No		High-risk pregnancy care		Age≥35	38	Good	2022-06-07
63			42			Jiangsu Province	Non-local permanent residents	College Diploma	Office Personnel and Related Workers	2022-06-07	2022-06-07	2022-04-06	2023-01-11	8weeks6days	4	2	170.00			62	106	61.00	Denial of Common Medical History	No	31	16	4-6	28-	No		No				No		No	No		Pregnancy Monitoring for Advanced Maternal Age Multiparous Women		Age≥40	40	Good	2022-06-07
64			32			Zhejiang Province	Non-local permanent residents	Postgraduate Education	Office Personnel and Related Workers	2022-06-08	2022-06-08	2022-04-18	2023-01-23	7weeks2days	2	1	160.00			67	117	55.50			28	16	5-7	30-	No			No	No	No	No		No	No		Routine prenatal care		Diabetes without medication	32	Good	2022-06-08
65			36			Liaoning Province	Shanghai	Undergraduate degree	Office Personnel and Related Workers	2022-06-08	2022-06-08	2022-03-28	2023-01-02	10weeks2days	3	2	171.00			58	103	58.00	Denial of Common Medical History	No	22	13	5-	29-	No		0	Unclear	No		No		No	No		High-risk pregnancy care,Monitoring of pregnancy with a history of fetal malformation Previous pregnancy Fetal cleft lip and palate Induction of labor		Age≥35,Adverse obstetric history	41	Good	2022-06-08
66			33			Jilin Province	Shanghai	Postgraduate Education	Unclassified Workers	2022-06-08	2022-06-08	2022-03-19	2022-12-24	11weeks4days	1	0	168.00			66	113	64.00			29	14	4-6	38-	No		No	No	No				No	No		Routine prenatal care		Normal	30	Good	2022-06-08
67			40			Jiangsu Province	Shanghai	Undergraduate degree	Public Servants	2022-06-08	2022-06-08	2022-04-05	2023-01-10	9weeks1days	1	0	168.00			76	120	52.00			36	14	7-	40-		breast cancer				No	No		No	No				Age≥35,BMI＜18.5,No metastasis or recurrence after treatment of malignant tumor	39	Good	2022-06-08
68			31			Liaoning Province	Non-local permanent residents	Undergraduate degree	Skilled Professionals	2022-06-08	2022-06-08	2022-03-29	2023-01-03	10weeks1days	1	0	170.00			68	110	51.00			30	14	5-6	32-	No						No		No	No				BMI＜18.5	30	Good	2022-06-08
69			30			Henan Province	Shanghai	Postgraduate Education	Unclassified Workers	2022-06-08	2022-06-08	2022-04-01	2023-01-06	9weeks5days	3	0	156.00			75	118	47.00			27	11	10-15	29-	No		No	No	No		No		No	No		High-risk pregnancy care, IVF pregnancy status: third-generation IVF.		Assisted reproductive pregnancy	31	Good	2022-06-08
70			30				Non-local permanent residents	Undergraduate degree	Unclassified Workers	2022-06-08	2022-06-08	2022-04-16	2023-01-21	7weeks4days	1	0	160.00			59	99	57.00	Denial of Common Medical History	Ferrous fumarate tablets and folic acid	25	13	7-	32-34	No		No	No	No		No		Other Situations	No		Routine prenatal care		Normal	28	Good	2022-06-08
71			38			Anhui Province	Non-local permanent residents	College Diploma	Unclassified Workers	2022-06-08	2022-06-08	2022-04-11	2023-01-16	8weeks2days	2	1	159.00			79	131	52.00			25	13	5-	28-	No		No				No		No	No		Pregnancy Monitoring for Advanced Maternal Age Multiparous Women,Scarred uterusHistory of cesarean section in the previous pregnancy		Age≥35,Scarred uterus	38	Good	2022-06-08
72			39			Anhui Province	Non-local permanent residents	Undergraduate degree	Skilled Professionals	2022-06-08	2022-06-08	2022-04-03	2023-01-08	9weeks3days	4	1	156.00			71	121	50.00			25	13	7-	27-	No		No				No		No	No				Age≥35	35	Good	2022-06-08
73			37			Shanghai	Shanghai	Undergraduate degree	Office Personnel and Related Workers	2022-06-09	2022-06-09	2022-04-09	2023-01-14	8weeks5days	1	0	161.00			80	136	78.00	Denial of Common Medical History		29	15	7-	28-	No		No				No		No	No		High-risk pregnancy careBMI≥28,Pregnancy Monitoring for Advanced Maternal Age Primiparous Women		Age≥35,BMI≥28	32	Good	2022-06-09
74			36			Shanghai	Shanghai	Undergraduate degree	Unclassified Workers	2022-06-09	2022-06-09	2022-04-17	2023-01-22	7weeks4days	2	0	166.00			65	104	56.00			33	12	7-	33-	No		No				No		No	No		High-risk pregnancy care,Pregnancy Monitoring for Advanced Maternal Age Primiparous Women		Age≥35	34	Good	2022-06-09
75			32			Shanghai	Shanghai	Postgraduate Education	Skilled Professionals	2022-06-09	2022-06-09	2022-03-31	2023-01-05	10weeks	1	0	161.50			65	122	50.00	Denial of Common Medical History	No	29	14	7-	28-	0	No	0	No	No	No	No		No	No		Routine prenatal care		Normal	35	Good	2022-06-09
76			35			Sichuan Province	Non-local permanent residents	Postgraduate Education	Office Personnel and Related Workers	2022-06-09	2022-06-09	2022-04-11	2023-01-16	8weeks3days	2	1	156.00			65	110	61.00			28	12	7-10	33-	No						No		No	No		High-risk pregnancy care,Pregnancy with Uterine Scar		BMI≥24,Scarred uterus	31	Good	2022-06-09
77			32			Jiangsu Province	Non-local permanent residents	College Diploma	Office Personnel and Related Workers	2022-06-09	2022-06-09	2022-04-12	2023-01-17	8weeks2days	1	0	159.00			78	135	65.00			26	12	10-15	28-		In July 2020, a pituitary microadenoma measuring approximately 1 x 1.5 mm was discovered, with no regular follow-up.		No	No	No	No		No	No		High-risk pregnancy careBMI≥24， Pituitary microadenoma possible1*1.5mm		BMI≥24	30	Good	2022-06-09
78			38			Heilongjiang Province	Non-local permanent residents	Undergraduate degree	Unclassified Workers	2022-06-09	2022-06-09	2022-04-08	2023-01-13	8weeks6days	1	0	170.00			65	109	61.80	Denial of Common Medical History	No	37	15	5-	30-	0	History of hepatic hemangioma for 1 year, gallbladder polyp for 3 years, thyroid nodule for 3 years, with regular check-ups	0	No	No	No	0	Unclear	No	No		Pregnancy Monitoring for Advanced Maternal Age Primiparous Women		Age≥35	33	Good	2022-06-09
79			29			Chongqing municipality	Non-local permanent residents	Senior Secondary Education	Unclassified Workers	2022-06-10	2022-06-10	2022-04-23	2023-01-28	6weeks6days	1	0	158.00			60	112	53.00			27	15	7-	30-	No		No				No		No	No		Pregnancy with ovarian cyst		Normal	25	Good	2022-06-10
80			29			Shanxi Province	Non-local permanent residents	Undergraduate degree	Skilled Professionals	2022-06-10	2022-06-10	2022-04-18	2023-01-23	7weeks4days	1	0	164.00			63	120	59.80			28	12	3-5	31-				No	No	No	No		No	No		High-risk pregnancy care,Pregnancy complicated by hypothyroidism		that do not require medication Other SituationsEndocrine system diseases	28	Good	2022-06-10
81			30			Shanghai	Shanghai	Undergraduate degree	Office Personnel and Related Workers	2022-06-10	2022-06-10	2022-03-31	2023-01-05	10weeks1days	2	0	162.00			72	121	47.50			27	15	3-5	28-	No		No				No		No	No		High-risk pregnancy careBMI<18.5		BMI＜18.5	29	Good	2022-06-10
82			28			Hebei Province	Non-local permanent residents	Undergraduate degree	Office Personnel and Related Workers	2022-06-10	2022-06-10	2022-04-16	2023-01-21	7weeks6days	1	0	173.50			82	108	48.00			26	12	4-5	30-		history of anal fistula.		No	No	No	No		No	No		High-risk pregnancy careBMI≤18.5		BMI＜18.5	30	Good	2022-06-10
83			30			Shandong Province	Shanghai	Postgraduate Education	Office Personnel and Related Workers	2022-06-10	2022-06-10	2022-04-12	2023-01-17	8weeks3days	1	0	164.00			65	111	64.00			28	13	4-6	30-		No	No	No	No		No		No	No		Routine prenatal care		Normal	31	Good	2022-06-10
84			36			Jiangsu Province	Non-local permanent residents	Undergraduate degree	Office Personnel and Related Workers	2022-06-10	2022-06-10	2022-04-06	2023-01-11	9weeks2days	2	1	162.00			60	99	57.00			30	12	15-30	30-	No		No				No		No	No		Pregnancy Monitoring for Advanced Maternal Age Multiparous Women,Possible ovarian cyst；70mm		Age≥35,Ovarian cyst≥5cm	39	Good	2022-06-10
85			31			Zhejiang Province	Shanghai	College Diploma	Unclassified Workers	2022-06-10	2022-06-10	2022-04-12	2023-01-17	8weeks3days	1	0	152.00			76	133	55.00			28	20	5-6	29-30	No			No	No	No	No		No	No		Routine prenatal care		Normal	28	Good	2022-06-10
86			39			Anhui Province	Non-local permanent residents	College Diploma	Unclassified Workers	2022-06-10	2022-06-10	2022-04-20	2023-01-25	7weeks2days	1	0	165.00			61	98	57.00			34	13	5-7	28-	No		No				No		No	No		High-risk pregnancy care		Age≥35	39	Good	2022-06-10
87			34			Shanghai	Shanghai	Undergraduate degree	Office Personnel and Related Workers	2022-06-10	2022-06-10	2022-04-06	2023-01-11	9weeks2days	1	0	159.00			64	104	45.00	Denial of Common Medical History	Folic acid	27	12	15-	31-	0	Thyroid nodule 3 years without medication	0	No	No	No	No		No	0		High-risk pregnancy careBMI<18.5,Uterine Leiomyomaspossible		BMI＜18.5	35	Good	2022-06-10
88			35			Hunan Province	Non-local permanent residents	Postgraduate Education	Skilled Professionals	2022-06-10	2022-06-10	2022-04-12	2023-01-17	8weeks3days	1	0	162.50			81	118	62.50		Progesterone	29	12	7-	30-36	0	Abdominal type with a history of urticaria for 10 years, currently not on medication; history of appendicitis; history of hypertension for 5 years, with intermittent medication.	0	No	No		0	Unclear	No	No		Routine prenatal care,High-risk pregnancy careHypertension 5 years ，Irregular medication adherence.		2|4|Other Situations Yellow alert classification ;Assessment Other Situations:高血压	35	Good	2022-06-10
89			29			Jiangsu Province	Shanghai	Postgraduate Education	Office Personnel and Related Workers	2022-06-10	2022-06-10	2022-04-13	2023-01-18	8weeks2days	2	0	168.50			74	124	50.00			27	15	7-	28-		Not clear		Unclear	Unclear	Unclear		peach	No	No		High-risk pregnancy careBMI<18.5		BMI＜18.5	31	Good	2022-06-10
90			30			Shaanxi Province	Non-local permanent residents	Undergraduate degree	Skilled Professionals	2022-06-13	2022-06-13	2022-04-15	2023-01-20	8weeks3days	1	0	171.50			64	125	62.00	Denial of Common Medical History	No	27	13	6-7	30-60	0	Hashimoto's hypothyroidism for 2 years (took levothyroxine until July 2021, then stopped medication), PCOS for 2 years (not on medication)	0	No	No	No	No		No	No		High-risk pregnancy careHashimoto's thyroiditis 2 years（Took Levothyroxine until July 2021, then discontinued medication.）,PCOS		Thyroid disease that does not require medication	27	Good	2022-06-13
91			29			Jiangsu Province	Non-local permanent residents	Undergraduate degree	Office Personnel and Related Workers	2022-06-13	2022-06-13	2022-04-07	2023-01-12	9weeks4days	1	0	161.00			75	111	65.00			25	13	7-	30-	No						No		No	No				BMI≥24,Arrhythmia	28	Good	2022-06-13
92			28			Shaanxi Province	Non-local permanent residents	Undergraduate degree	Office Personnel and Related Workers	2022-06-13	2022-06-13	2022-03-26	2022-12-31	11weeks2days	1	0	155.00			61	100	53.00			26	15	4-5	30-	No		No				No		No	No				Normal	31	Good	2022-06-13
93			33			Shanxi Province	Shanghai	Postgraduate Education	Office Personnel and Related Workers	2022-06-13	2022-06-13	2022-04-16	2023-01-21	8weeks2days	1	0	162.00			76	109	52.50			30	12	7-	36-	No		No				No		No	No				Arrhythmia	30	Good	2022-06-13
94			35			Jiangsu Province	Shanghai	Undergraduate degree	Skilled Professionals	2022-06-13	2022-06-13	2022-04-13	2023-01-18	8weeks5days	1	0	161.50			80	114	67.00			30	14	5-	30-	No		No				No		No	No		High-risk pregnancy care BMI>24		BMI≥24	36	Good	2022-06-13
95			29			Anhui Province	Non-local Migrant Population	Undergraduate degree	Office Personnel and Related Workers	2022-06-13	2022-06-13	2022-04-05	2023-01-10	9weeks6days	1	0	163.00			65	105	69.00			26	15	3-5	30-	No		No	No	No		No		No	No		High-risk pregnancy care BMI＞24		BMI≥24	32	Good	2022-06-13
96			31			Shanghai	Shanghai	College Diploma	Office Personnel and Related Workers	2022-06-13	2022-06-13	2022-04-24	2023-01-29	7weeks1days	1	0	162.00			62	97	50.00			29	21	4-6	28-	No		No				No		No	No		Routine prenatal care		Normal	30	Good	2022-06-13
97			32			Inner Mongolia Autonomous Region	Shanghai	Undergraduate degree	Office Personnel and Related Workers	2022-06-13	2022-06-13	2022-05-01	2023-02-05	6weeks1days	1	0	158.00			63	108	59.00			30	14	6-	30-	No						No		No	No				Normal	30	Good	2022-06-13
98			40			Jiangsu Province	Non-local permanent residents	College Diploma	Office Personnel and Related Workers	2022-06-13	2022-06-13	2022-04-13	2023-01-18	8weeks5days	3	1	168.00			57	103	78.00			33	12	5-7	26-				No	No	hepatitis B	No		No	No				Age≥35,BMI≥24,Scarred uterus	36	Good	2022-06-13
99			34				Shanghai	Undergraduate degree	Unclassified Workers	2022-06-13	2022-06-13	2022-04-21	2023-01-26	7weeks4days	1	0	158.00			63	105	57.20			32	13	7-	30-	No						No		No	No				Normal	37	Good	2022-06-13
100			32			Anhui Province	Non-local permanent residents	Undergraduate degree	Office Personnel and Related Workers	2022-06-13	2022-06-13	2022-04-23	2023-01-28	7weeks2days	1	0	157.00			70	121	50.00	Denial of Common Medical History		30	13	5-	28-	No		No				No		No	No				Normal		Good	2022-06-13
101			35			Shanghai	Shanghai	College Diploma	Office Personnel and Related Workers	2022-06-13	2022-06-13	2022-04-01	2023-01-06	10weeks3days	1	0	165.00			71	107	53.00			28	14	3-5	28-30		Hashimoto's hypothyroidism for 1 year (self-discontinued medication for six months		No	No		No		No	No		High-risk pregnancy careHashimoto's thyroiditis 1 year. Self-discontinued medication for half a year.		Thyroid disease that does not require medication	38	Good	2022-06-13
102			28			Anhui Province	Non-local permanent residents	College Diploma	Unclassified Workers	2022-06-13	2022-06-13	2022-04-06	2023-01-11	9weeks5days	3	0	167.00			75	112	65.00			26	13	5-7	30-		psoriasis	No					medicated plaster	No	No				Normal			2022-06-13
103			35				Shanghai	Undergraduate degree	Unclassified Workers	2022-06-13	2022-06-13	2022-04-22	2023-01-27	7weeks3days	1	0	158.00			59	105	58.00		Ningbitai Capsule	31	15	5-	32-	No		No				No		No	No				Normal	40	Good	2022-06-13
104			41			Shanghai	Shanghai	Postgraduate Education	Office Personnel and Related Workers	2022-06-13	2022-06-13	2022-04-14	2023-01-19	8weeks4days	1	0	163.00			63	108	61.00	Denial of Common Medical History	No	34	11	6-	30-	0	dermatographism 20 years	0	No	No		0		No	No		Pregnancy Monitoring for Advanced Maternal Age Primiparous Women,High-risk pregnancy care,Uterine Leiomyomas		Age≥40	42	Good	2022-06-13
105			30			Hunan Province	Non-local permanent residents	Undergraduate degree	Unclassified Workers	2022-06-13	2022-06-13	2022-04-09	2023-01-14	9weeks2days	1	0	162.50			79	120	62.00	Denial of Common Medical History		28	14	7-	28-	0	History of Hashimoto's hypothyroidism for 1 year, took traditional Chinese medication until March 10, 2022.	0	No	No	No	No		No	No		High-risk pregnancy careHashimoto's thyroiditis		Thyroid disease that does not require medication	32	Good	2022-06-13
106			39			Shanghai	Shanghai	Postgraduate Education	Office Personnel and Related Workers	2022-06-13	2022-06-13	2022-03-27	2023-01-01	11weeks1days	3	1	167.00			58	111	56.00			28	15	5-6	30-	No		No				No		No	No		High-risk pregnancy care,Pregnancy Monitoring for Advanced Maternal Age Multiparous Women		Age≥35	37	Good	2022-06-13
107			35			Gansu Province	Non-local permanent residents	Undergraduate degree	Unclassified Workers	2022-06-14	2022-06-14	2022-04-08	2023-01-13	9weeks4days	5	1	167.00			65	103	60.00			27	14	7-	35-	No		No				No		No	No		High-risk pregnancy care,Pregnancy complicated byArrhythmia		Various types of miscarriage ≥3 ,Arrhythmia	33	Good	2022-06-14
108			33			Jilin Province	Shanghai	Undergraduate degree	Public Servants	2022-06-14	2022-06-14	2022-04-16	2023-01-21	8weeks3days	1	0	163.00			77	120	51.00			28	14	7-	30-	No			Unclear	No		No		No	No		Routine prenatal care		Normal	32	Good	2022-06-14
109			35			Shandong Province	Shanghai	Postgraduate Education	Unclassified Workers	2022-06-14	2022-06-14	2022-04-10	2023-01-15	9weeks2days	2	1	158.00			80	120	49.00			28	15	5-	40-	No		No				No		No	No				Normal	30	Good	2022-06-14
110			36			Liaoning Province	Non-local permanent residents	Undergraduate degree	Office Personnel and Related Workers	2022-06-14	2022-06-14	2022-04-14	2023-01-19	8weeks5days	2	0	170.00			55	108	55.00	Denial of Common Medical History	Fenofibrate ,Vitamin E,Vitamin C,Elevit	31	13	5-7	28-	No								No	No		High-risk pregnancy care,Pregnancy Monitoring for Advanced Maternal Age Primiparous Women,IVF pregnancy status		Age≥35,Assisted reproductive pregnancy	44	Good	2022-06-14
111			25			Shanghai	Shanghai	College Diploma	Office Personnel and Related Workers	2022-06-14	2022-06-14	2022-04-12	2023-01-17	9weeks	2	0	165.00			75	110	58.00			20	16	6-	30-	No						No		No	No		Routine prenatal care		Normal	39	Good	2022-06-14
112			33			Shanxi Province	Non-local Migrant Population	Undergraduate degree	Office Personnel and Related Workers	2022-06-14	2022-06-14	2022-04-08	2023-01-13	9weeks4days	1	0	166.50			78	125	50.00			31	14	6-7	30-		No	No	No	No		No		No	No		High-risk pregnancy careBMI<18.5		BMI＜18.5	34	Good	2022-06-14
113			29			Jiangsu Province	Non-local permanent residents	Undergraduate degree	Commercial and Service Industry Personnel	2022-06-14	2022-06-14	2022-04-25	2023-01-30	7weeks1days	1	0	158.00			58	99	47.00			25	12	6-7	30-		Hepatitis B 'small three yang' for 10 years, no medication has been given.		No	No	No	No		No	No		High-risk pregnancy care,Hepatitis B surface antigen (HBsAg) positive, anti-HBe positive, and anti-HBc positive		Hepatitis B virus surface antigen positive and liver function Normal	24	Good	2022-06-14
114			39			Fujian Province	Non-local permanent residents	Postgraduate Education	Unclassified Workers	2022-06-14	2022-06-14	2022-04-09	2023-01-14	9weeks3days	2	1	157.50			72	133	49.00	Denial of Common Medical History		30	15	3-7	28-		adenomyosis		No	No	No			No	No					39	Good	2022-06-14
115			36			Zhejiang Province	Shanghai	Postgraduate Education	Skilled Professionals	2022-06-14	2022-06-14	2022-04-13	2023-01-18	8weeks6days	2	0	162.50			69	130	56.00			33	10	3-5	27-29	No						No		No	No		Pregnancy Monitoring for Advanced Maternal Age Primiparous Women		Age≥35	33	Good	2022-06-14
116			28			Jiangsu Province	Non-local permanent residents	Undergraduate degree	Skilled Professionals	2022-06-14	2022-06-14	2022-04-15	2023-01-20	8weeks4days	1	0	168.00			90	156	80.00			27	13	7-	30-	No		No				No		No	No		Pregnancy complicated by chronic hypertension,Uterine leiomyoma		Hypertensive disorders of pregnancy, excluding high-risk (red and orange) categories.,BMI≥28	28	Good	2022-06-14
117			40				Shanghai	Postgraduate Education	Unclassified Workers	2022-06-15	2022-06-15	2022-04-14	2023-01-19	8weeks6days	1	0	171.00			64	114	60.00			38	14	6-	28-		papilloma of the mammary duct					No		No	No				Age≥35	35	Good	2022-06-15
118			32			Jiangsu Province	Shanghai	Undergraduate degree	Office Personnel and Related Workers	2022-06-15	2022-06-15	2022-04-04	2023-01-09	10weeks2days	1	0	166.00			70	116	50.00			30	14	7-	30-		Polycystic ovary syndrome (PCOS) for 2 years (treated with dydrogesterone for 4 months)	No				No		No	No		High-risk pregnancy careBMI≤18.5		BMI＜18.5	34	Fair	2022-06-15
119			33			Anhui Province	Non-local permanent residents	Postgraduate Education	Skilled Professionals	2022-06-15	2022-06-15	2022-04-09	2023-01-14	9weeks4days	1	0	160.00			68	113	46.00	Denial of Common Medical History	No	27	13	5-7	32-35	No		No				No		No	No		High-risk pregnancy careBMI＜18.5）		BMI＜18.5	31	Good	2022-06-15
120			30			Shanghai	Shanghai	Undergraduate degree	Unclassified Workers	2022-06-15	2022-06-15	2022-04-18	2023-01-23	8weeks2days	2	0	163.50			76	121	60.00	Denial of Common Medical History	Aspirin,Dydrogesterone Tablets	28	12	7-	30-	No		0				No		No	No		Routine prenatal care		Normal	31	Fair	2022-06-15
121			31			Shanghai	Shanghai	Undergraduate degree	Skilled Professionals	2022-06-15	2022-06-15	2022-04-10	2023-01-15	9weeks3days	2	1	170.00			113	129	57.50	Denial of Common Medical History	No	26	14	7-	28-	No		No				No		No	No				Normal	30	Good	2022-06-15
122			32			Jiangsu Province	Shanghai	Undergraduate degree	Unclassified Workers	2022-06-15	2022-06-15	2022-04-10	2023-01-15	9weeks3days	2	0	178.50			76	125	60.00	Denial of Common Medical History		24	13	7-	28-30	No		No				No		No	No		Routine prenatal care		Normal	32	Good	2022-06-15
123			33			Fujian Province	Shanghai	Undergraduate degree	Office Personnel and Related Workers	2022-06-15	2022-06-15	2022-04-28	2023-02-02	6weeks6days	1	0	170.00			75	120	48.00			31	11	7-	32-	No		No				No		No	No				BMI＜18.5,Ovarian cyst≥5cm	31	Good	2022-06-15
124			33			Shanghai	Shanghai	Vocational Secondary Education	Office Personnel and Related Workers	2022-06-15	2022-06-15	2022-04-09	2023-01-14	9weeks4days	2	0	160.00			71	112	57.00	Denial of Common Medical History	No	29	13	15-30	32-	No		0	No	No	No	No		No	No		Routine prenatal care		Normal	35	Good	2022-06-15
125			33			Jiangsu Province	Shanghai	Postgraduate Education	Office Personnel and Related Workers	2022-06-15	2022-06-15	2022-04-09	2023-01-14	9weeks4days	1	0	163.00			62	105	55.00	Denial of Common Medical History	No	25	13	4-6	32-	No		No				No		No	No		Routine prenatal care		Normal	32	Good	2022-06-15
126			35			Jiangsu Province	Non-local permanent residents	Undergraduate degree	Office Personnel and Related Workers	2022-06-15	2022-06-15	2022-04-03	2023-01-08	10weeks3days	2	1	158.00			63	108	59.00			30	15	5-	30-	No			No	No	No	No		No	No		Routine prenatal care		Normal	32	Good	2022-06-15
127			29			Heilongjiang Province	Shanghai	Postgraduate Education	Office Personnel and Related Workers	2022-06-15	2022-06-15	2022-03-20	2022-12-25	12weeks3days	2	0	166.00			71	109	57.00			26	15	4-6	28-30	No		No				No		No	No		Routine prenatal care		Normal	30	Good	2022-06-15
128			32			Jiangxi Province	Shanghai	Undergraduate degree	Office Personnel and Related Workers	2022-06-15	2022-06-15	2022-04-02	2023-01-07	10weeks4days	1	0	160.00			79	146	70.00			28	13	5-	28-32	No		No				No		No	No		High-risk pregnancy care BMI≥24		BMI≥24,Prior pelvic surgery	33	Good	2022-06-15
129			32			Hubei Province	Non-local permanent residents	Undergraduate degree	Office Personnel and Related Workers	2022-06-15	2022-06-15	2022-03-24	2022-12-29	11weeks6days	1	0	158.00			60	108	53.00			30	13	-	20-	0	Chronic gastritis for 8 years (currently not on medication).	No				No		No	No		Routine prenatal care		Normal	33	Good	2022-06-15
130			31			Heilongjiang Province	Shanghai	Postgraduate Education	Office Personnel and Related Workers	2022-06-15	2022-06-15	2022-04-09	2023-01-14	9weeks4days	1	0	154.50			81	123	48.00	Denial of Common Medical History	No	29	11	4-6	28-30	No		No				No		No	No		Routine prenatal care		Normal	30	Good	2022-06-15
131			35			Shanghai	Shanghai	Undergraduate degree	Office Personnel and Related Workers	2022-06-15	2022-06-15	2022-04-21	2023-01-26	7weeks6days	1	0	160.00			62	99	58.00			31	12	7-	35-	No						No		No	No				Normal	34	Good	2022-06-15
132			40			Anhui Province	Non-local permanent residents	Senior Secondary Education	Office Personnel and Related Workers	2022-06-15	2022-06-15	2022-04-01	2023-01-06	10weeks5days	2	1	153.00			57	94	48.00			38	16	5-	28-	No		No				No		No	No		Pregnancy Monitoring for Advanced Maternal Age Multiparous Women		Age≥35	40	Good	2022-06-15
133			33			Jiangsu Province	Shanghai	Undergraduate degree	Office Personnel and Related Workers	2022-06-15	2022-06-15	2022-03-30	2023-01-04	11weeks	1	0	169.00			64	100	55.00	Denial of Common Medical History	No	29	15	4-6	34-36	0	No	0	No	No	No	0	Unclear	No	No		Routine prenatal care		Normal	32	Good	2022-06-15
134			36			Shanghai	Shanghai	Undergraduate degree	Unclassified Workers	2022-06-15	2022-06-15	2022-04-29	2023-02-03	6weeks5days	1	0	165.00			71	131	57.00			5	12	5-	30-	No						No		No	No				Age≥35	30	Good	2022-06-15
135			31			Inner Mongolia Autonomous Region	Non-local permanent residents	Undergraduate degree	Office Personnel and Related Workers	2022-06-16	2022-06-16	2022-03-10	2022-12-15	14weeks	1	0	155.50			66	112	56.50			26	13	6-7	40-60		PCOS	No	No	No		No		No	No		Routine prenatal care,PCOS		Normal	32	Good	2022-06-16
136			36			Jiangsu Province	Shanghai	Postgraduate Education	Public Servants	2022-06-16	2022-06-16	2022-04-03	2023-01-08	10weeks4days	3	1	160.50			67	110	51.00			28	12	3-	30-60	No		No				No		No	No		Pregnancy monitoring for advanced maternal age in multiparous women with a history of hypothyroidism, requiring high-risk pregnancy care.		Age≥35	34		2022-06-16
137			31			Shanghai	Shanghai	Undergraduate degree	Unclassified Workers	2022-06-16	2022-06-16	2022-04-23	2023-01-28	7weeks5days	1	0	158.00			66	111	50.00			29	14	3-5	27-30	No		No				No		No	No				Normal	33	Good	2022-06-16
138			30			Anhui Province	Non-local permanent residents	Undergraduate degree	Unclassified Workers	2022-06-16	2022-06-16	2022-04-17	2023-01-22	8weeks4days	1	0	172.00			84	117	63.00			27	14	7-	35-38	No		No	No	No				No	No		Routine prenatal care,Pregnancy with ovarian cyst left 48*33*32mm		Normal	30	Good	2022-06-16
139			35			Jiangsu Province	Shanghai	Postgraduate Education	Office Personnel and Related Workers	2022-06-16	2022-06-16	2022-04-15	2023-01-20	8weeks6days	1	0	165.50			66	114	50.00			33	12	7-8	28-30	No		Serious genetic disease (hemophilia)				No		Other Situations	No		High-risk pregnancy careBMI<18.5,Uterine Leiomyomas（ diameter 3cm）,Ovarian cyst（ diameter 23mm)		BMI＜18.5	35	Good	2022-06-16
140			34			Liaoning Province	Shanghai	Postgraduate Education	Unclassified Workers	2022-06-16	2022-06-16	2022-04-14	2023-01-19	9weeks	1	0	176.00			67	112	58.00	Denial of Common Medical History		27	12	5-	28-	No		No				No		No	No		Routine prenatal care		Normal	32	Good	2022-06-16
141			35			Jiangsu Province	Non-local permanent residents	Undergraduate degree	Office Personnel and Related Workers	2022-06-16	2022-06-16	2022-04-10	2023-01-15	9weeks4days	2	1	155.50			83	128	77.00			25	13	3-5	37-	No			No	No	No	No		No	No		High-risk pregnancy care BMI>28,Scarred uterus		Scarred uterus,BMI≥28	35	Good	2022-06-16
142			30			139900000000	Non-local permanent residents	Undergraduate degree	Office Personnel and Related Workers	2022-06-16	2022-06-16	2022-04-17	2023-01-22	8weeks4days	1	0	171.50			58	93	60.00			28	28	4-6	30-	No		No				No		No	No		Routine prenatal care		Normal	30	Good	2022-06-16
143			32			Jiangsu Province	Shanghai	Postgraduate Education	Unclassified Workers	2022-06-16	2022-06-16	2022-04-08	2023-01-13	9weeks6days	1	0	154.50			68	109	45.00	Denial of Common Medical History		25	14	-	28-		Hashimoto's thyroiditis in 2020, took half a tablet of Levothyroxine until around December 2021. During the pregnancy preparation period, switched to 1 tablet, and on March 1, increased to 1.25 tablets. On June 3, due to elevated TSH, switched to 1.5 tablets.							No	No		High-risk pregnancy care,Pregnancy complicated by hypothyroidism		Uncomplicated hypothyroidism requiring medication	31	Good	2022-06-16
144			31			Shanghai	Shanghai	Undergraduate degree	Skilled Professionals	2022-06-17	2022-06-17	2022-04-28	2023-02-02	7weeks1days			158.00			82	120	68.00			29	15	5-6	28-	No		No				No		No	No		High-risk pregnancy care		BMI≥24			2022-06-17
145			32			Hunan Province	Non-local permanent residents	Postgraduate Education	Office Personnel and Related Workers	2022-06-17	2022-06-17	2022-04-20	2023-01-25	8weeks2days	5	1	159.00			57	103	48.00			23	11	10-15	28-	No		No				No		No	No		Recurrent miscarriage,High-risk pregnancy care		Various types of miscarriage ≥3	31	Good	2022-06-17
146			36			Henan Province	Non-local permanent residents	Postgraduate Education	Skilled Professionals	2022-06-17	2022-06-17	2022-04-23	2023-01-28	7weeks6days	2	1	161.00			62	103	53.00			29	13	3-5	26-	No						No		No	No		Pregnancy Monitoring for Advanced Maternal Age Multiparous Women,High-risk pregnancy care Previous pregnancy Gestational diabetesA1		Age≥35	33	Good	2022-06-17
147			29			Hunan Province	Non-local permanent residents	Junior Secondary Education	Unclassified Workers	2022-06-17	2022-06-17	2022-03-25	2022-12-30	12weeks	3	1	159.00			63	99	46.00			24	12	5-	30-37	No			No	No	No	No		No	No		High-risk pregnancy careBMI<18.5		BMI＜18.5	37	Good	2022-06-17
148			34			Hubei Province	Non-local permanent residents	Postgraduate Education	Office Personnel and Related Workers	2022-06-17	2022-06-17	2022-04-08	2023-01-13	10weeks	1	0	166.00			55	110	54.00	Denial of Common Medical History	JianWeiXiaoShiPian	31	15	7-	28-	No		Serious genetic diseases （Genetic hyperlipidemia）	No	No	No	No		Alcohol	No		Routine prenatal care, Low-grade squamous intraepithelial lesion (LSIL)		Normal	34	Good	2022-06-17
149			30			Sichuan Province	Shanghai	Undergraduate degree	Office Personnel and Related Workers	2022-06-17	2022-06-17	2022-04-10	2023-01-15	9weeks5days	1	0	160.50			60	105	52.50			26	13	6-	29-		No		No	No	Mother and grandmother have thrombocytopenia		No	No	No		Routine prenatal care		Normal	29	Good	2022-06-17
150			32			Shanghai	Shanghai	Postgraduate Education	Office Personnel and Related Workers	2022-06-17	2022-06-17	2022-04-14	2023-01-19	9weeks1days	1	0	165.50			62	110	57.00			31	14	7-	28-		Gastric polyp removal surgery 3 years ago.		No	No	No		No	No	No		High-risk pregnancy care,Multiple uterine leiomyomas, with the largest measuring 62 mm x 56 mm x 53 mm.		Uterine Leiomyomas≥5cm	33	Good	2022-06-17
151			39			Shanghai	Shanghai	Undergraduate degree	Office Personnel and Related Workers	2022-06-17	2022-06-17	2022-04-10	2023-01-15	9weeks5days	3	1	167.00			68	124	60.00	Denial of Common Medical History	No	27	16	10-15	34-	0	Gastric polyp removal surgery 3 years ago.	0	No	No	No	0	No	No	No		Pregnancy Monitoring for Advanced Maternal Age Multiparous Women		Age≥35	40	Good	2022-06-17
152			31			Shanghai	Shanghai	Undergraduate degree	Office Personnel and Related Workers	2022-06-17	2022-06-17	2022-04-10	2023-01-15	9weeks5days	1	0	165.00			67	117	64.00	Denial of Common Medical History	No	28	13	7-	30-90	No		0	No	No	No	0	No	No	No		Routine prenatal care		Normal	34	Good	2022-06-17
153			31			Anhui Province	Non-local permanent residents	Undergraduate degree	Office Personnel and Related Workers	2022-06-17	2022-06-17	2022-04-30	2023-02-04	6weeks6days	3	1	164.00			56	98	52.00		Folic acid	26	16	7-	28-	No		0				No		No	No		Routine prenatal care		Normal	31	Good	2022-06-17
154			35			Jiangsu Province	Non-local permanent residents	Undergraduate degree	Office Personnel and Related Workers	2022-06-17	2022-06-17	2022-04-15	2023-01-20	9weeks	1	0	156.50			77	123	45.00			30	14	7-	45-60	No		No	No	No		No		No	No		High-risk pregnancy care，BMI<18.5		BMI＜18.5	35	Good	2022-06-17
155			35			Anhui Province	Non-local permanent residents	Undergraduate degree	Office Personnel and Related Workers	2022-06-17	2022-06-17	2022-05-03	2023-02-07	6weeks3days	1	0	163.00			62	100	53.00			32	18	4-	28-		No		No	No	No	No		No	No		Routine prenatal care		Normal	36	Good	2022-06-17
156			36			Shanghai	Shanghai	Postgraduate Education	Office Personnel and Related Workers	2022-06-17	2022-06-17	2022-04-11	2023-01-16	9weeks4days	1	0	171.50			70	118	67.50	Denial of Common Medical History	No	32	12	5-	28-	0	Lumbar spine and muscle strain for 5 years, with regular physical therapy	0	No	No	No	0	hydrogen peroxide	No	No		High-risk pregnancy care,Pregnancy Monitoring for Advanced Maternal Age Primiparous Women		Age≥35	39	Good	2022-06-17
157			29			Fujian Province	Non-local Migrant Population	Undergraduate degree	Office Personnel and Related Workers	2022-06-17	2022-06-17	2022-04-17	2023-01-22	8weeks5days	1	0	159.50			65	95	43.00	Denial of Common Medical History	No		14	4-	30-	0	History of allergic purpura and nephritis 14 years ago (self-reported as cured)	No				No		No	No		High-risk pregnancy careBMI<18.5;History of Henoch-Schönlein purpura (HSP)、History of resolved nephritis		BMI＜18.5	31	Fair	2022-06-17
158			31			Zhejiang Province	Shanghai	Postgraduate Education	Office Personnel and Related Workers	2022-06-17	2022-06-17	2022-04-16	2023-01-21	8weeks6days	1	0	158.00			67	111	46.00	Denial of Common Medical History	Dydrogesterone Tablets，ZiShenYuTaiWan	27	13	15-30	31-	0	Positive IgM for cytomegalovirus one year ago, discontinued medication for six months.	0	No	No	No	No		No	No		High-risk pregnancy careBMI<18.5，Cytomegalovirus IgM positive		BMI＜18.5	29	Good	2022-06-17
159			34				Non-local permanent residents	Other Situations		2022-06-17	2022-06-17	2022-04-03	2023-01-08	10weeks5days			168.00			59	113	51.00	Denial of Common Medical History	ProgesteroneAllylestrenol	32	14	4-5	30-	No		No				No		No	No		Cervical neoplasms,High-risk pregnancy care,Trichomoniasis		BMI＜18.5			2022-06-17
160			40			Jiangsu Province	Non-local permanent residents	Vocational Secondary Education	Commercial and Service Industry Personnel	2022-06-17	2022-06-17	2022-04-22	2023-01-27	8weeks	2	1	158.00			73	113	65.00	Denial of Common Medical History	No	26	15	4-	28-30	No		No				No		No	No		High-risk pregnancy care，Rhnegative ，BMI>24,Pregnancy Monitoring for Advanced Maternal Age Multiparous Women,Scarred uterusOne cesarean section		Age≥35,BMI≥24,Scarred uterus,2|4|Other Situations Yellow alert classification ;Assessment Other Situations:RHnegative Blood Type	44	Good	2022-06-17
161			32			Hubei Province	Non-local permanent residents	Undergraduate degree	Unclassified Workers	2022-06-17	2022-06-17	2022-04-09	2023-01-14	9weeks6days	4	1	169.00			70	117	58.00			25	13	4-6	35-37	No		No				No		No	No		Routine prenatal care		Normal	31	Fair	2022-06-17
162			36			Anhui Province	Non-local permanent residents	Vocational Secondary Education	Unclassified Workers	2022-06-17	2022-06-17	2022-04-14	2023-01-19	9weeks1days	2	1	173.50			58	104	60.00			29	16	7-	28-		Hashimoto's thyroiditis 10 years，not taking medication，Regular follow-up		No	No	No		No	No	No		Pregnancy Monitoring for Advanced Maternal Age Multiparous Women,Scarred uterus 1 time CS, Hashimoto's thyroiditis, not on medication.		Age≥35,Thyroid disease that does not require medication,Scarred uterus	42	Good	2022-06-17
163			35			Jiangsu Province	Shanghai	Undergraduate degree	Office Personnel and Related Workers	2022-06-17	2022-06-17	2022-04-07	2023-01-12	10weeks1days	1	0	177.50			69	132	75.00			32	12	5-7	28-	No			No	No	No	No		No	No		Routine prenatal care,Uterine Leiomyomas		Normal	31	Good	2022-06-17
164			37			Shanghai	Shanghai	Undergraduate degree	Office Personnel and Related Workers	2022-06-17	2022-06-17	2022-04-06	2023-01-11	10weeks2days			160.00			97	159	85.00			29	13	7-	38-	No						No		No	No		High-risk pregnancy care,Hypertension,Obesity,Pregnancy Monitoring for Advanced Maternal Age Primiparous Women		Age≥35,Hypertensive disorders of pregnancy, excluding high-risk (red and orange) categories.,BMI≥28	35	Good	2022-06-17
165			36				Shanghai	Other Situations	Unclassified Workers	2022-06-20	2022-06-20	2022-04-20	2023-01-25	8weeks5days	1	0	160.00			69	120	55.00			29	13	7-	30-	No						No		No	No				Age≥35,Assisted reproductive pregnancy	33	Good	2022-06-20
166			35			Henan Province	Non-local permanent residents	Postgraduate Education	Office Personnel and Related Workers	2022-06-20	2022-06-20	2022-05-02	2023-02-06	7weeks	2	0	156.00			72	102	48.00			31	13	5-	30-40	No					No	No		No	No				Normal	33	Good	2022-06-20
167			37			Shanghai	Shanghai	Undergraduate degree	Office Personnel and Related Workers	2022-06-20	2022-06-20	2022-04-11	2023-01-16	10weeks	2	0	152.00			63	102	41.50			33	13	6-	30-	No		No				No		No	No				Age≥35,BMI＜18.5	33	Fair	2022-06-20
168			31			Henan Province	Non-local permanent residents	Undergraduate degree	Unclassified Workers	2022-06-20	2022-06-20	2022-03-07	2022-12-12	15weeks	1	0	159.00			72	124	50.00	Denial of Common Medical History	Dydrogesterone Tablets	27	16	5-7	40-60	0	Polycystic ovary syndrome for 2 years (stopped Finasteride until 21-09)	0	No	father with hepatitis B	No	No		No	No		Routine prenatal care,PCOS		Normal	31	Good	2022-06-20
169			33				Shanghai	Postgraduate Education	Office Personnel and Related Workers	2022-06-20	2022-06-20	2022-05-05	2023-02-09	6weeks4days	2	1	167.00			61	117	59.00			25	13	5-	28-30	No		No				No		No	No				Normal	32	Good	2022-06-20
170			29			Shanghai	Shanghai	Postgraduate Education	Unclassified Workers	2022-06-20	2022-06-20	2022-04-14	2023-01-19	9weeks4days	1	0	174.00			66	106	65.00	Denial of Common Medical History		24	14	7-	40-	No		No				No		No	No		High-risk pregnancy care,Pregnancy with ovarian cystright 52*47*39mm， left 9mm		Ovarian cyst≥5cm	29	Good	2022-06-20
171			33			Zhejiang Province	Non-local permanent residents	Undergraduate degree	Skilled Professionals	2022-06-20	2022-06-20	2022-05-13	2023-02-17	5weeks3days	2	0	163.00			66	109	50.00			29	15	6-7	28-30		History of hyperthyroidism for 15 years (currently not taking medication), reports being cured		No	No	No		No	No	No		High-risk pregnancy care， Post-myomectomy ，History of hyperthyroidism，Self-reported as cured.		Prior pelvic surgery	25	Good	2022-06-20
172			29			Shanghai	Shanghai	College Diploma	Office Personnel and Related Workers	2022-06-20	2022-06-20	2022-03-24	2022-12-29	12weeks4days	1	0	169.00			85	130	63.00		Chinese herbal supplement for pregnancy support, Dydrogesterone Tablets	26	15	6-7	40-	No		No				No		No	No		Insulin Resistance		Normal	28	Good	2022-06-20
173			37			Shanghai	Shanghai	Undergraduate degree	Office Personnel and Related Workers	2022-06-20	2022-06-20	2022-04-06	2023-01-11	10weeks5days	1	0	166.50			81	127	59.00	Denial of Common Medical History	ZiShenYuTaiWan、Folic acid	33	11	7-10	25-32	No		No				No		No	No		High-risk pregnancy care,Pregnancy Monitoring for Advanced Maternal Age Primiparous Women		Age≥35	32		2022-06-20
174			30			Jiangsu Province	Shanghai	Undergraduate degree	Unclassified Workers	2022-06-20	2022-06-20	2022-04-18	2023-01-23	9weeks	1	0	160.50			68	117	49.00			27	13	6-	25-		Childhood history of pneumonia		No	No	grandmother diabetes	No		No	No		Routine prenatal care		Normal	29	Good	2022-06-20
175			36			Shanghai	Shanghai	Undergraduate degree	Office Personnel and Related Workers	2022-06-20	2022-06-20	2022-03-24	2022-12-29	12weeks4days	4	0	160.00			61	99	60.00			32	12	-	30-		Uterine fibroids for over 7 years		No	No	No	No		No	No		History of multiple miscarriages, Multiple Uterine Leiomyomas( largest one 7cm),High-risk pregnancy care： Post-myomectomy ,Pregnancy Monitoring for Advanced Maternal Age Primiparous Women		Age≥35,Uterine Leiomyomas≥5cm, Various types of miscarriage ≥3	35	Good	2022-06-20
176			35			Shanghai	Shanghai	Undergraduate degree	Unclassified Workers	2022-06-20	2022-06-20	2022-04-26	2023-01-31	7weeks6days	1	0	173.50			79	104	56.00			32	15	5-	30-	No		No				No		No	No				Normal	37	Good	2022-06-20
177			31			Anhui Province	Non-local permanent residents	College Diploma	Office Personnel and Related Workers	2022-06-20	2022-06-20	2022-03-30	2023-01-04	11weeks5days	1	0	155.50			76	109	52.00			29	16	6-7	30-99	No		No				No		No	No		Routine prenatal care,PCOS		Normal	30	Good	2022-06-20
178			37			Hunan Province	Shanghai	Postgraduate Education	Skilled Professionals	2022-06-20	2022-06-20	2022-04-18	2023-01-23	9weeks	2	1	164.50			58	98	57.00			30	15	6-	28-		Hashimoto's hypothyroidism for 7 years (currently taking Euthyrox 75ug qd)		No	No	maternal grandmother with diabetes、 maternal grandfather with heart disease		No	No	No		Pregnancy Monitoring for Advanced Maternal Age Multiparous Women,High-risk pregnancy care,Hypothyroidism Hypothyroidism 7年（ Levothyroxine 75ug qd）		Age≥35,Uncomplicated hypothyroidism requiring medication	36	Good	2022-06-20
179			31			Zhejiang Province	Shanghai	Undergraduate degree	Unclassified Workers	2022-06-20	2022-06-20	2022-04-14	2023-01-19	9weeks4days	1	0	168.00			80	104	54.00			29	14	5-	30-	No		No				No		No	No		Routine prenatal care		Normal	30	Good	2022-06-20
180			35			Jiangxi Province	Non-local permanent residents	Undergraduate degree	Office Personnel and Related Workers	2022-06-20	2022-06-20	2022-04-16	2023-01-21	9weeks2days	1	0	165.00			52	102	51.50			28	16	5-	30-	No		No				No		No	No				Ovarian cyst≥5cm	34	Good	2022-06-20
181			31			Hubei Province	Shanghai	Postgraduate Education	Skilled Professionals	2022-06-20	2022-06-20	2022-04-24	2023-01-29	8weeks1days	1	0	162.00			64	98	57.00			28	12	7-	30-	No		No				No		No	No				Normal	29	Good	2022-06-20
182			30			Zhejiang Province	Non-local permanent residents	Undergraduate degree	Office Personnel and Related Workers	2022-06-20	2022-06-20	2022-04-10	2023-01-15	10weeks1days	1	0	160.00			65	115	49.00	Denial of Common Medical History	No	26	10	7-	30-	0	No	0	No	No	No	No		No	No		Routine prenatal care		Normal	27	Good	2022-06-20
183			29			519900000000	Non-local permanent residents	Undergraduate degree	Office Personnel and Related Workers	2022-06-20	2022-06-20	2022-03-30	2023-01-04	11weeks5days	1	0	166.00			70	109	50.00			27	12	4-6	28-	No		No				No		No	No		High-risk pregnancy care，BMI＜18.5		BMI＜18.5	30	Good	2022-06-20
184			36			Inner Mongolia Autonomous Region	Non-local permanent residents	Undergraduate degree	Office Personnel and Related Workers	2022-06-21	2022-06-21	2022-04-17	2023-01-22	9weeks2days	3	1	165.00			66	110	56.00			26	13	5-6	35-	No		No				No		No	No		High-risk pregnancy care,Pregnancy with Uterine Scar,Pregnancy Monitoring for Advanced Maternal Age Multiparous Women		Age≥35,Scarred uterus	36	Good	2022-06-21
185			31			Hunan Province	Non-local permanent residents	Undergraduate degree	Office Personnel and Related Workers	2022-06-21	2022-06-21	2022-04-06	2023-01-11	10weeks6days	1	0	165.50			71	120	64.00			27	14	7-	31-	No		No				No		No	No		left Possible ovarian cyst，20*20*24mm,Routine prenatal care		Normal	29	Good	2022-06-21
186			34			Jiangsu Province	Non-local permanent residents	Senior Secondary Education	Unclassified Workers	2022-06-21	2022-06-21	2022-04-26	2023-01-31	8weeks	1	0	162.00			59	99	60.00	Denial of Common Medical History	Levothyroxine	32	13	3-5	30-	0	Six months after thyroid cancer removal surgery, currently taking 1.5 to 2 tablets of Euthyrox every other day, with follow-up thyroid function tests normal	No	No	No		No		No	No		High-risk pregnancy care,History of thyroid cancer： Oral levothyroxine		No metastasis or recurrence after treatment of malignant tumor	43	Good	2022-06-21
187			33			Hunan Province	Non-local permanent residents	Undergraduate degree	Unclassified Workers	2022-06-21	2022-06-21	2022-04-14	2023-01-19	9weeks5days	3	1	158.00			52	94	51.50			26	13	7-	33-	No		No				No		No	No		High-risk pregnancy care,Pregnancy with Uterine Scar		Scarred uterus	33	Good	2022-06-21
188			39			Shanghai	Shanghai	Undergraduate degree	Skilled Professionals	2022-06-21	2022-06-21	2022-04-05	2023-01-10	11weeks	2	0	162.00			61	118	67.50			37	12	4-	28-30	No			No	No	No	No		No	No		High-risk pregnancy careBMI>24,Pregnancy Monitoring for Advanced Maternal Age Primiparous Women,Uterine Leiomyomaspossible，14mm		Age≥35,BMI≥24	40	Good	2022-06-21
189			44			Anhui Province	Non-local permanent residents	Senior Secondary Education	Unclassified Workers	2022-06-21	2022-06-21	2022-04-05	2023-01-10	11weeks	4	1	155.00			61	106	70.00		Folic acid	42	15	7-10	30-	No		No				No		No	No		High-risk pregnancy care,Pregnancy Monitoring for Advanced Maternal Age Multiparous Women,Pregnancy complicated byObesity,Uterine leiomyoma,Pregnancy with Uterine Scar		BMI≥28,Age≥40,Scarred uterus	46	Good	2022-06-21
190			33			Shanxi Province	Non-local permanent residents	Postgraduate Education		2022-06-21	2022-06-21	2022-04-11	2023-01-16	10weeks1days	1	0	168.00			62	106	55.00			28	13	5-7	28-30	No		No				No		No	No		Routine prenatal care		Normal			2022-06-21
191			35			Anhui Province	Non-local permanent residents	Undergraduate degree	Unclassified Workers	2022-06-21	2022-06-21	2022-04-15	2023-01-20	9weeks4days	3	0	165.50			64	102	72.00	Denial of Common Medical History		32	11	7-	30-	No		No				No		No	No		High-risk pregnancy care，BMI>24，Smoking: 10 years (cigarette smoking for 1 year). Diffuse thyroid disease: 5 years (not on medication).,Uterine Leiomyomaspossible，21*20*17mm		BMI≥24,Thyroid disease that does not require medication	33	Good	2022-06-21
192			34			Henan Province	Non-local Migrant Population	Senior Secondary Education	Unclassified Workers	2022-06-21	2022-06-21	2022-04-13	2023-01-18	9weeks6days	2	0	160.00			70	108	51.00			33	12	7-	23-28	No					No		shrimp、mango	No	No		Routine prenatal care, Multiple uterine leiomyomas, the largest measuring 17 mm.		Normal	29	Good	2022-06-21
193			35			Henan Province	Non-local permanent residents	College Diploma	Unclassified Workers	2022-06-21	2022-06-21	2022-04-04	2023-01-09	11weeks1days	3	1	158.50			75	113	50.00			26	12	3-4	28-	No			No	No	No		No	No	No		High-risk pregnancy care,Pregnancy supervision with a history of ectopic pregnancy		2|4|Other Situations Yellow alert classification ;Assessment Other Situations: History of Ectopic Pregnancy.	33	Good	2022-06-21
194			34				Shanghai	Postgraduate Education	Unclassified Workers	2022-06-21	2022-06-21	2022-04-18	2023-01-23	9weeks1days	1	0	163.00			73	103	46.00			24	13	5-7	30-	No						No		No	No		High-risk pregnancy care		BMI＜18.5	35	Good	2022-06-21
195			39			Shanghai	Shanghai	Undergraduate degree	Office Personnel and Related Workers	2022-06-21	2022-06-21	2022-04-20	2023-01-25	8weeks6days	1	0	157.00			51	106	75.00			37	15	3-	30-40	No		No				No		No	No		High-risk pregnancy careBMI>28,Pregnancy Monitoring for Advanced Maternal Age Primiparous Women,Uterine Leiomyomas		Age≥35,BMI≥28	41	Fair	2022-06-21
196			36			Shanghai	Shanghai	Undergraduate degree	Office Personnel and Related Workers	2022-06-21	2022-06-21	2022-04-17	2023-01-22	9weeks2days	1	0	171.00			58	110	59.00		No	28	14	5-	24-	No		0	No	No	My grandmother has diabetes	No		No	No		Left Possible ovarian cyst，48*43*37mm,Uterine Leiomyomaspossible，23mm,Pregnancy Monitoring for Advanced Maternal Age Primiparous Women,High-risk pregnancy care		Age≥35	36	Good	2022-06-21
197			30			Jiangsu Province	Shanghai	College Diploma	Office Personnel and Related Workers	2022-06-21	2022-06-21	2022-04-12	2023-01-17	10weeks	1	0	156.50			72	117	50.00	Denial of Common Medical History	No	24	13	7-	32-	No		No				No		No	No		Routine prenatal care		Normal	30	Good	2022-06-21
198			36			Shanghai	Shanghai	Postgraduate Education	Unclassified Workers	2022-06-21	2022-06-21	2022-04-26	2023-01-31	8weeks	2	1	158.00			55	120	56.00			28	13	7-	28-	No						No		No	No		Pregnancy Monitoring for Advanced Maternal Age Multiparous Women,Hepatitis B surface antigen carriers		Age≥35,Hepatitis B virus surface antigen positive and liver function Normal	35	Good	2022-06-21
199			35				Shanghai	Other Situations	Unclassified Workers	2022-06-22	2022-06-22	2022-04-16	2023-01-21	9weeks4days	2	1	169.00			65	111	56.00			26	12	5-6	28-	No		No				No		No	No		Routine prenatal care		Normal	35	Good	2022-06-22
200			37			Zhejiang Province	Shanghai	Postgraduate Education	Office Personnel and Related Workers	2022-06-22	2022-06-22	2022-04-17	2023-01-22	9weeks3days	2	1	167.50			60	120	61.00	Denial of Common Medical History	No	26	14	3-5	28-	0	Hashimoto's thyroiditis 2 years (Reports normal thyroid function, not taking medication, regular check-ups).	0	No	No	No	0	No	No	No		Pregnancy Monitoring for Advanced Maternal Age Multiparous Women,Hashimoto's thyroiditis, with normal thyroid function tests, not on medication, and undergoing regular check-ups.		Age≥35,Thyroid disease that does not require medication	35	Good	2022-06-22
201			31			Anhui Province	Non-local permanent residents	College Diploma	Unclassified Workers	2022-06-22	2022-06-22	2022-04-17	2023-01-22	9weeks3days	3	1	170.00			58	102	61.00			30	15	10-15	32-	No			No	No	No	No		No	No		Routine prenatal care		Normal	31	Good	2022-06-22
202			31			Jiangsu Province	Non-local permanent residents	College Diploma	Unclassified Workers	2022-06-22	2022-06-22	2022-04-22	2023-01-27	8weeks5days	2	0	161.50			70	118	66.00	Denial of Common Medical History	No	27	14	7-	28-	No		0	No	No	No	0	No	No	No		High-risk pregnancy careBMI≥24,Pregnancy supervision with a history of ectopic pregnancy		BMI≥24,2|4|Other Situations Yellow alert classification ;Assessment Other Situations:Ectopic pregnancy	32	Good	2022-06-22
203			41				Shanghai	Undergraduate degree	Unclassified Workers	2022-06-22	2022-06-22	2022-04-17	2023-01-22	9weeks3days	1	0	160.00			68	127	55.00	Denial of Common Medical History		39	13	4-5	28-	0	Right ovarian cyst discovered in November 2021.	0				No		No	No				Ovarian cyst≥5cm,Age≥40	29	Good	2022-06-22
204			33			Anhui Province	Non-local permanent residents	Postgraduate Education	Unclassified Workers	2022-06-22	2022-06-22	2022-04-21	2023-01-26	8weeks6days	1	0	157.50			70	106	61.00	Denial of Common Medical History	No	28	12	4-6	29-	No		No	No	No		0	No	No	No		High-risk pregnancy careBMI≥24		BMI≥24	30	Good	2022-06-22
205			23			Shanghai	Shanghai	College Diploma	Commercial and Service Industry Personnel	2022-06-22	2022-06-22	2022-04-01	2023-01-06	11weeks5days	1	0	168.00			68	101	50.00			22	13	7-	28-	No		No				No		No	No				BMI＜18.5	32	Good	2022-06-22
206			37				Shanghai	Undergraduate degree	Unclassified Workers	2022-06-22	2022-06-22	2022-04-18	2023-01-23	9weeks2days	2	1	168.00			67	101	60.00			26	13	7-	35-40	No						No		No	No				Age≥35	40	Good	2022-06-22
207			33			Shanghai	Shanghai	College Diploma	Unclassified Workers	2022-06-22	2022-06-22	2022-04-26	2023-01-31	8weeks1days	3	0	168.00			77	125	63.00			25	18	5-	30-	No		No				No		No	No				Adverse obstetric history	34	Good	2022-06-22
208			40			Shaanxi Province	Non-local permanent residents	Junior Secondary Education	Operational Staff and Associated Individuals	2022-06-22	2022-06-22	2022-04-28	2023-02-02	7weeks6days	5	1	159.00			69	115	51.00			20	16	4-5	28-	No		No				No		No	No				Age≥35, Various types of miscarriage ≥3	39	Good	2022-06-22
209			36			Jiangsu Province	Shanghai	Undergraduate degree	Unclassified Workers	2022-06-22	2022-06-22	2022-04-08	2023-01-13	10weeks5days	1	0	162.00			59	115	52.00			32	14	6-	28-	No		No				No		No	No		Pregnancy Monitoring for Advanced Maternal Age Primiparous Women,High-risk pregnancy care		Age≥35	34	Good	2022-06-22
210			31			Shaanxi Province	Non-local permanent residents	Undergraduate degree	Unclassified Workers	2022-06-22	2022-06-22	2022-03-29	2023-01-03	12weeks1days	1	0	162.50			75	114	52.50			30	14	5-6	30-	No		No				No		No	No		Routine prenatal care		Normal	32	Good	2022-06-22
211			35			Zhejiang Province	Shanghai	Undergraduate degree	Unclassified Workers	2022-06-22	2022-06-22	2022-04-15	2023-01-20	9weeks5days	1	0	156.00			64	100	48.00	Denial of Common Medical History	No	28	14	8-	30-	No		No				No		No	No		Possible bilateral ovarian mesenteric cysts,Routine prenatal care		Normal	33	Good	2022-06-22
212			34			Anhui Province	Non-local permanent residents	Undergraduate degree	Skilled Professionals	2022-06-22	2022-06-22	2022-04-18	2023-01-23	9weeks2days	2	1	160.00			64	104	57.00			28	11	5-	28-	No		No				No		No	No				Normal	32	Good	2022-06-22
213			34				Non-local permanent residents	Undergraduate degree	Unclassified Workers	2022-06-22	2022-06-22	2022-04-29	2023-02-03	7weeks5days											31	14	5-	28-	No						No		No	No		Routine prenatal care		Normal	32	Good	2022-06-22
214			32			Liaoning Province	Shanghai	Postgraduate Education	Office Personnel and Related Workers	2022-06-22	2022-06-22	2022-04-16	2023-01-21	9weeks4days	2	0	167.00			83	118	52.50			27	15	7-	33-	No			father has Marfan syndrome	No	No	No		No	No				Arrhythmia	32	Good	2022-06-22
215			35			Shanghai	Shanghai	Undergraduate degree	Office Personnel and Related Workers	2022-06-22	2022-06-22	2022-05-06	2023-02-10	6weeks5days	2	1	166.00			57	116	54.00			28	14	5-	31-		No	No	No	No				No	No				Normal	39	Good	2022-06-22
216			33			Hubei Province	Non-local permanent residents	College Diploma	Office Personnel and Related Workers	2022-06-22	2022-06-22	2022-03-30	2023-01-04	12weeks	1	0	160.00			77	133	54.00			30	13	7-	30-	No		No				No		No	No				Normal			2022-06-22
217			36			Jiangsu Province	Shanghai	Postgraduate Education	Office Personnel and Related Workers	2022-06-22	2022-06-22	2022-04-20	2023-01-25	9weeks	1	0	165.50			59	111	54.00			31	12	7-	29-	No						No		No	No		High-risk pregnancy care,Pregnancy Monitoring for Advanced Maternal Age Primiparous Women		Age≥35	39	Good	2022-06-22
218			34			Shanghai	Shanghai	Undergraduate degree	Office Personnel and Related Workers	2022-06-22	2022-06-22	2022-04-18	2023-01-23	9weeks2days	3	1	167.50			86	126	62.00	Denial of Common Medical History	No	33	16	7-	35-	No		No				No		No	No		High-risk pregnancy care,Scarred uterus 1time CS,HPV infectionHPV16 infection		Scarred uterus	33	Good	2022-06-22
219			31			Anhui Province	Shanghai	Undergraduate degree	Office Personnel and Related Workers	2022-06-22	2022-06-22	2022-04-05	2023-01-10	11weeks1days	1	0	157.00			81	128	57.00	Denial of Common Medical History		30	14	7-	28-	No		No				No		No	No		Routine prenatal care		Normal	35	Good	2022-06-22
220			30			Heilongjiang Province	Non-local permanent residents	Undergraduate degree	Office Personnel and Related Workers	2022-06-22	2022-06-22	2022-04-13	2023-01-18	10weeks	1	0	159.00			56	101	47.00	Denial of Common Medical History		27	16	4-	30-	No		0	No	No	My mother has heart disease	No		No	No		left Possible ovarian cyst，31*29*25mm,Routine prenatal care		Normal	28	Good	2022-06-22
221			32			321100000000	Non-local permanent residents	Postgraduate Education	Skilled Professionals	2022-06-22	2022-06-22	2022-04-06	2023-01-11	11weeks	1	0	172.00			67	107	65.00			30	12	6-	22-			No				No		No	No				Uterine Leiomyomas≥5cm,Endocrine system diseases,Scarred uterus	30	Good	2022-06-22
222			35			Shanghai	Shanghai	College Diploma	Unclassified Workers	2022-06-23	2022-06-23	2022-04-06	2023-01-11	11weeks1days	3	1	171.50			65	111	50.00			22	14	7-	28-	No		No				No		No	No		High-risk pregnancy careBMI＜18.5;,Scarred uterus 1 time CS		BMI＜18.5,Scarred uterus	34	Good	2022-06-23
223			29			Zhejiang Province	Shanghai	Postgraduate Education	Office Personnel and Related Workers	2022-06-23	2022-06-23	2022-04-23	2023-01-28	8weeks5days	1	0	159.00			59	96	57.00			28	12	5-7	28-	No		No				No		No	No				Blood system diseases	28	Good	2022-06-23
224			32			Jiangsu Province	Non-local permanent residents	College Diploma	Office Personnel and Related Workers	2022-06-23	2022-06-23	2022-04-20	2023-01-25	9weeks1days	3	1	165.00			66	116	65.00			27	16	7-	40-		Induced labor in 2018 due to the absence of the fetal corpus callosum		No	No	No			No	No		High-risk pregnancy care，Induced abortion in 2018 due to fetal agenesis of the corpus callosum, followed by pregnancy during lactation.		Adverse obstetric history	32	Good	2022-06-23
225			33			Shanghai	Shanghai	Undergraduate degree	Office Personnel and Related Workers	2022-06-23	2022-06-23	2022-04-16	2023-01-21	9weeks5days	2	1	171.00			78	131	65.00	Denial of Common Medical History	No	31	14	4-6	35-	No		No				No		No	No		High-risk pregnancy care：History of gestational hypertension in previous pregnancy、Previous history of preeclampsia		Normal	35	Good	2022-06-23
226			33			Shandong Province	Shanghai	Undergraduate degree	Office Personnel and Related Workers	2022-06-23	2022-06-23	2022-04-19	2023-01-24	9weeks2days	1	0	164.00			59	123	52.50			26	12	15-30	28-	No		No				No		No	No				Normal	34	Good	2022-06-23
227			43			Shanghai	Shanghai	Undergraduate degree	Unclassified Workers	2022-06-23	2022-06-23	2022-04-05	2023-01-10	11weeks2days	1	0	161.50			60	104	51.00	Denial of Common Medical History	Dydrogesterone Tablets	35	13	7-	30-	No		No				No		No	No		Pregnancy Monitoring for Advanced Maternal Age Primiparous Women,Scarred uterus：A history of one myomectomy		Scarred uterus,Age≥40	41	Good	2022-06-23
228			37				Shanghai	Undergraduate degree	Unclassified Workers	2022-06-23	2022-06-23	2022-04-25	2023-01-30	8weeks3days	2	0	160.00			67	108	45.00			29	12	10-15	28-		No	No					No	No	No		Uterine Leiomyomas		Age≥35	40		2022-06-23
229			28			Shanghai	Shanghai	College Diploma	Office Personnel and Related Workers	2022-06-23	2022-06-23	2022-04-25	2023-01-30	8weeks3days	1	0	160.50			69	107	45.00	Denial of Common Medical History		27	13	-	28-	0	Hashimoto's thyroiditis 3 years，not taking medication，Regular follow-up；adenomyosis+history of ovarian cysts	0	No	No	No	0		No	No		High-risk pregnancy care，BMI<18.5,Adenomyosis,Hashimoto's thyroiditis，Untreated		BMI＜18.5,Prior pelvic surgery,Thyroid disease that does not require medication	30	Good	2022-06-23
230			37			Shanghai	Shanghai	Undergraduate degree	Public Servants	2022-06-23	2022-06-23	2022-04-27	2023-02-01	8weeks1days	1	0	160.00			63	95	50.00	Denial of Common Medical History	No	29	14	-	28-	Cardiovascular disease	Left breast fibroadenoma removal surgery in 2004.	Family history of hypertension and the current blood pressure of the pregnant woman.≥1Serious genetic diseases （Genetic hyperlipidemia）0/Other Situations0mmHg	No	No		penicillin	No	Radiation	No		Pregnancy Monitoring for Advanced Maternal Age Primiparous Women Fracture of the right metatarsal:		Age≥35	36	Good	2022-06-23
231			33			Shandong Province	Shanghai	Postgraduate Education	Unclassified Workers	2022-06-23	2022-06-23	2022-04-16	2023-01-21	9weeks5days	1	0	164.00			71	124	59.00	Denial of Common Medical History	No	27	12	7-	26-	0	High myopia in both eyes (1000 degrees), fundus examination shows no abnormalities	0				No		No	No		Routine prenatal care		Normal	33	Good	2022-06-23
232			38				Shanghai	Other Situations	Unclassified Workers	2022-06-23	2022-06-23	2022-04-21	2023-01-26	9weeks	3	1	165.00			72	127	52.50			26	14	7-	35-	No		No				No		No	No		Uterine Leiomyomas,Intrauterine fluid,|Uterine Leiomyomas		Age≥35,Scarred uterus	36	Good	2022-06-23
233			27			Henan Province	Non-local permanent residents	Undergraduate degree	Unclassified Workers	2022-06-23	2022-06-23	2022-04-23	2023-01-28	8weeks5days	2	0	166.00			69	109	52.00	Denial of Common Medical History	No	25	13	5-7	35-	No		No				No		No	No				Normal	23	Good	2022-06-23
234			27			Heilongjiang Province	Non-local permanent residents	Senior Secondary Education	Office Personnel and Related Workers	2022-06-23	2022-06-23	2022-03-29	2023-01-03	12weeks2days	2	0	166.00			61	113	51.00	Denial of Common Medical History	No	34	13	4-6	21-30	No		No				No		Alcohol	No		Routine prenatal care		Normal	38	Good	2022-06-23
235			36			Jiangsu Province	Non-local permanent residents	Undergraduate degree	Unclassified Workers	2022-06-23	2022-06-23	2022-05-03	2023-02-07	7weeks2days	2	1	165.00			63	97	65.00			27	13	5-7	28-		No						No	No	No				Age≥35	42	Fair	2022-06-23
236			36			Zhejiang Province	Non-local permanent residents	Undergraduate degree	Office Personnel and Related Workers	2022-06-23	2022-06-23	2022-04-23	2023-01-28	8weeks5days	3	2	167.00			74	112	68.00			26	12	5-	32-	No						No		No	No		Scarred uterus		Age≥35,BMI≥24,Scarred uterus	35	Good	2022-06-23
237			34			Shanghai	Shanghai	Undergraduate degree	Unclassified Workers	2022-06-24	2022-06-24	2022-04-16	2023-01-21	9weeks6days	1	0	168.00			68	108	60.00	Denial of Common Medical History		29	14	6-	30-	No		No				No		No	No		Scarred uterus，2020Laparoscopic myomectomy,High-risk pregnancy care		Scarred uterus	40	Good	2022-06-24
238			29			Jiangsu Province	Non-local permanent residents	College Diploma	Office Personnel and Related Workers	2022-06-24	2022-06-24	2022-04-10	2023-01-15	10weeks5days	4	1	174.50			60	106	58.00	Denial of Common Medical History	No	23	14	7-	30-	No		No				No		No	No		Routine prenatal care		Normal	29	Good	2022-06-24
239			37			Jiangsu Province	Shanghai	Undergraduate degree	Office Personnel and Related Workers	2022-06-24	2022-06-24	2022-04-23	2023-01-28	8weeks6days	2	0	164.50			54	101	49.00	Denial of Common Medical History	No	30	13	5-	30-	No		0	No	No	No	0		No	No		High-risk pregnancy careBMI＜18.5,Multiple Uterine Leiomyomas (14mm),Pregnancy Monitoring for Advanced Maternal Age Primiparous Women		Age≥35,BMI＜18.5	35	Good	2022-06-24
240			33			Jiangsu Province	Shanghai	Postgraduate Education	Unclassified Workers	2022-06-24	2022-06-24	2022-04-25	2023-01-30	8weeks4days	2	0	161.00			52	99	57.00			31	14	5-	31-	No		No				No		No	No				Normal	33	Good	2022-06-24
241			31			Zhejiang Province	Shanghai	Postgraduate Education	Skilled Professionals	2022-06-24	2022-06-24	2022-04-11	2023-01-16	10weeks4days	1	0	166.50			62	92	50.00	Denial of Common Medical History	No	26	13	7-	28-35	No		0	No	No	No	0	No	No	No		High-risk pregnancy care，BMI＜18.5		BMI＜18.5	28	Good	2022-06-24
242			33			Jiangxi Province	Non-local permanent residents	Undergraduate degree	Office Personnel and Related Workers	2022-06-24	2022-06-24	2022-05-12	2023-02-16	6weeks1days			150.00			62	107	47.00			31	13	6-7	32-	No		No				No		No	No		High-risk pregnancy care		Prior pelvic surgery	35	Good	2022-06-24
243			34			Hubei Province	Non-local permanent residents	Undergraduate degree	Office Personnel and Related Workers	2022-06-24	2022-06-24	2022-05-06	2023-02-10	7weeks	2	1	160.00			69	111	45.00	Denial of Common Medical History	No	26	12	5-7	35-	No		No				No		No	No		High-risk pregnancy care		BMI＜18.5	32	Good	2022-06-24
244			35			Shanghai	Shanghai	Postgraduate Education	Office Personnel and Related Workers	2022-06-24	2022-06-24	2022-04-22	2023-01-27	9weeks	1	0	164.50			53	101	54.50			29	14	6-8	32-35	No		No				No		No	No		High-risk pregnancy care,Scarred uterus，2019-12 Laparoscopic myomectomy		Scarred uterus	34	Good	2022-06-24
245			33			Jiangsu Province	Non-local permanent residents	Postgraduate Education	Skilled Professionals	2022-06-24	2022-06-24	2022-04-23	2023-01-28	8weeks6days	2	0	156.00			64	109	45.00			27	13	4-5	28-29	No		No				No		No	No		Pregnancy surveillance in women with a history of molar pregnancy,High-risk pregnancy care：BMI＜18.5;,Hepatitis B surface antigen (HBsAg) positive, anti-HBe positive, and anti-HBc positive10余年，Untreated，Lack of regular follow-up:		BMI＜18.5,Hepatitis B virus surface antigen positive and liver function Normal	33	Good	2022-06-24
246			31			Shandong Province	Shanghai	Postgraduate Education	Office Personnel and Related Workers	2022-06-24	2022-06-24	2022-04-25	2023-01-30	8weeks4days	2	1	170.50			69	124	54.00			25	14	4-	30-	No		No				No		No	No		High-risk pregnancy care, History of Henoch-Schönlein purpura (HSP) in childhood (cured for 20 years, no recurrence), gestational diabetes mellitus (GDM) (A1) in the previous pregnancy, history of precipitous delivery.		2|4|Other Situations Yellow alert classification ;Assessment Other Situations:History of Rapid Delivery	29	Good	2022-06-24
247			32			Liaoning Province	Shanghai	Postgraduate Education	Skilled Professionals	2022-06-24	2022-06-24	2022-04-11	2023-01-16	10weeks4days	1	0	167.00			72	122	57.00	Denial of Common Medical History	No	27		3-5	30-	No		No				No		No	No		Routine prenatal care		Normal	30	Good	2022-06-24
248			34			Zhejiang Province	Non-local permanent residents	Undergraduate degree	Office Personnel and Related Workers	2022-06-24	2022-06-24	2022-05-01	2023-02-05	7weeks5days	2	1	164.00			59	119	72.00			31	14	7-	30-37	No			No	No	father Hyperglycemia		No	No	No		High-risk pregnancy care，BMI≥24		BMI≥24	31	Good	2022-06-24
249			33			Zhejiang Province	Non-local Migrant Population	Undergraduate degree	Office Personnel and Related Workers	2022-06-24	2022-06-24	2022-04-26	2023-01-31	8weeks3days	1	0	157.00			57	111	51.00	Denial of Common Medical History	No	30	13	-	30-	0	History of chronic urticaria for over 20 years, with recurrent episodes. Experienced an episode at 8 weeks of pregnancy.	0	No	No		0		No	No		Routine prenatal care		Normal	34	Good	2022-06-24
250			31			Shanghai	Shanghai	Undergraduate degree	Office Personnel and Related Workers	2022-06-24	2022-06-24	2022-04-13	2023-01-18	10weeks2days	1	0	161.50			62	106	67.00	Denial of Common Medical History	No	26	11	7-	30-90	0	Chronic Nephritis:Diagnosed in 2016 and treated with Jinshuibao for one year, reporting current recovery.	0				0	No	No	No		High-risk pregnancy careBMI≥24， Chronic nephritis ，Claims to be completely cured.		BMI≥24	34	Good	2022-06-24
251			38			Shanghai	Shanghai	Undergraduate degree	Office Personnel and Related Workers	2022-06-24	2022-06-24	2022-04-29	2023-02-03	8weeks			173.00			86	148	77.00			35		10-15	39-	No		No				No		No	No		High-risk pregnancy care,Pregnancy Monitoring for Advanced Maternal Age Primiparous Women,Hypothyroidism		Age≥35,BMI≥24,Uncomplicated hypothyroidism requiring medication	34	Good	2022-06-24
252			39			Shanghai	Shanghai	Undergraduate degree	Office Personnel and Related Workers	2022-06-24	2022-06-24	2022-04-15	2023-01-20	10weeks			159.00			83	130	50.00			37	13	5-	26-	No		No				No		No	No		Pregnancy Monitoring for Advanced Maternal Age Primiparous Women		Age≥35	37	Good	2022-06-24
253			27			Jiangxi Province	Non-local permanent residents	Undergraduate degree	Skilled Professionals	2022-06-24	2022-06-24	2022-04-18	2023-01-23	9weeks4days	1	0	172.00			68	116	62.50			25	12	7-	28-		Hepatitis B (Small Three Yang): Diagnosed for 5 years, no medication taken, and not regularly monitored.		No	No	husband father with diabetes		No	No	No		Hepatitis B surface antigen (HBsAg) positive, anti-HBe positive, and anti-HBc positive small three Yang 5 years（Untreated，Lack of regular follow-up）,High-risk pregnancy care		Hepatitis B virus surface antigen positive and liver function Normal	27	Good	2022-06-24
254			34			Hebei Province	Non-local permanent residents	Postgraduate Education	Office Personnel and Related Workers	2022-06-24	2022-06-24	2022-04-08	2023-01-13	11weeks	1	0	169.50			59	103	60.00			31	13	4-5	34-38	No			No	No	No	No		No	No		Routine prenatal care		Normal	31	Good	2022-06-24
255			38			Jilin Province	Non-local permanent residents	Undergraduate degree	Office Personnel and Related Workers	2022-06-24	2022-06-24	2022-03-24	2022-12-29	13weeks1days	2	1	162.50			85	132	69.00			26	18	4-6	30-35		Thyroid Cancer:Underwent surgery in February 2022, no radiation or chemotherapy afterward. Currently taking 2 tablets of Levothyroxine (Euthyrox) daily. Experienced GDM (A1) in a previous pregnancy and had pregnancy-induced hypertension (not treated with medication).					No		No	No		Pregnancy Monitoring for Advanced Maternal Age Multiparous Women,Scarred uterus 1 time CS,High-risk pregnancy careBMI≥24， Previous pregnancy GDM（A1）， Pregnancy hypertension（Untreated）, left History of thyroid cancer ， Levothyroxine 2# qd		Age≥35,BMI≥24,Scarred uterus,No metastasis or recurrence after treatment of malignant tumor	40	Good	2022-06-24
256			34			Shandong Province	Non-local permanent residents	Undergraduate degree	Office Personnel and Related Workers	2022-06-24	2022-06-24	2022-04-10	2023-01-15	10weeks5days	3	0	165.00			64	119	54.00	Denial of Common Medical History	Progesterone，Folic acid，Vitamin D3	27	15	7-	28-	0	Ovarian Mucinous Cystadenoma: Underwent two surgeries for removal. In 2019, at 24 weeks of pregnancy, had an induced labor due to fetal cleft lip and palate (amniocentesis showed no abnormalities). In May 2021, had a missed miscarriage at 11 weeks, with chromosomal analysis revealing a chromosomal deletion.	0	No	No	No	No		No	No		High-risk pregnancy care,Monitoring of pregnancy with a history of fetal malformation 1 time . Fetal cleft lip and palate Induction of labor ,A missed miscarriage at 11 weeks of pregnancy requiring dilation and curettage (with sex chromosome deletion).Pregnancy supervision with a history of embryonic arrest		Prior pelvic surgery,Adverse obstetric history	33	Good	2022-06-24
257			41			Zhejiang Province	Non-local permanent residents	Senior Secondary Education	Office Personnel and Related Workers	2022-06-24	2022-06-24	2022-04-05	2023-01-10	11weeks3days	4	1	163.00			48	101	56.00			23	16	7-	30-	No		No				No		No	No		High-risk pregnancy care,Pregnancy Monitoring for Advanced Maternal Age Multiparous Women		Age≥40	33	Good	2022-06-24
258			34			Jiangxi Province	Non-local permanent residents	Undergraduate degree	Office Personnel and Related Workers	2022-06-24	2022-06-24	2022-04-17	2023-01-22	9weeks5days	4	1	156.00			65	114	52.00			27	12	3-4	28-29	No			Hypertension	No	No		No	No	No		High-risk pregnancy care,Pregnancy supervision with a history of embryonic arrest		Adverse obstetric history	34	Good	2022-06-24
259			38			Shandong Province	Non-local permanent residents	Other Situations	Office Personnel and Related Workers	2022-06-27	2022-06-27	2022-04-25	2023-01-30	9weeks	3	0	166.00			63	107	60.00			28	16	7-	35-	No		No				No		No	No		IVF pregnancy status,Pregnancy Monitoring for Advanced Maternal Age Primiparous Women		Age≥35,Assisted reproductive pregnancy,Uncomplicated hypothyroidism requiring medication	39	Good	2022-06-27
260			29			Shanghai	Shanghai	Undergraduate degree	Office Personnel and Related Workers	2022-06-27	2022-06-27	2022-04-24	2023-01-29	9weeks1days	1	0	166.00			59	104	50.00			27	15	6-7	35-	No			Father has a history of hepatitis B				Compound Paracetamol and Amantadine Hydrochloride Capsules (brand cold-relief capsules)	No	No		High-risk pregnancy care，BMI＜18.5		BMI＜18.5	32	Good	2022-06-27
261			34			Shanghai	Shanghai	College Diploma	Office Personnel and Related Workers	2022-06-27	2022-06-27	2022-04-21	2023-01-26	9weeks4days	3	0	170.00			72	112	55.00			28		4-5	30-		History of hyperthyroidism in 2017, previously treated with Levothyroxine. Cured after I131 radioactive treatment in 2020, currently not following up regularly.					No		No	No		High-risk pregnancy care: In June 2019, a missed miscarriage at 8 weeks of pregnancy required dilation and curettage. In June 2021, at 5 weeks of pregnancy, there was abnormal embryo development, also requiring dilation and curettage. Pregnancy supervision with a history of embryonic arrest and hyperthyroidism.		Adverse obstetric history	36	Good	2022-06-27
262			33			Anhui Province	Non-local permanent residents	Postgraduate Education	Skilled Professionals	2022-06-27	2022-06-27	2022-04-13	2023-01-18	10weeks5days	3	1	160.00			54	92	53.00			28	14	7-10	30-		Uterine Fibroids: Discovered in 2016.		No	No	No	No		No	No				Uterine Leiomyomas≥5cm	35	Good	2022-06-27
263			35			Shaanxi Province	Non-local permanent residents	Postgraduate Education	Unclassified Workers	2022-06-27	2022-06-27	2022-05-04	2023-02-08	7weeks5days	2	0	154.00			59	104	42.00	Denial of Common Medical History		31	15	7-	32-60	No		No				No		No	No				BMI＜18.5	30	Good	2022-06-27
264			29			Jiangsu Province	Shanghai	Undergraduate degree	Skilled Professionals	2022-06-27	2022-06-27	2022-04-23	2023-01-28	9weeks2days	1	0	162.50			73	102	55.00			26	14	7-	31-	No								No	No		Routine prenatal care		Normal	33	Good	2022-06-27
265			37			Sichuan Province Ziyang	Shanghai	Postgraduate Education	Unclassified Workers	2022-06-27	2022-06-27	2022-04-25	2023-01-30	9weeks			168.00			78	113	44.00			26	12	5-	30-	No		No				No		No	No		IVF pregnancy status,Pregnancy Monitoring for Advanced Maternal Age Primiparous Women		Age≥35,BMI＜18.5,Assisted reproductive pregnancy	35	Good	2022-06-27
266			41			Zhejiang Province	Shanghai	Undergraduate degree	Office Personnel and Related Workers	2022-06-27	2022-06-27	2022-04-12	2023-01-17	10weeks6days	2	1	166.00			73	116	66.00			32	14	7-	28-	No						No		No	No				Age≥40,BMI≥24,Scarred uterus,Endocrine system diseases	42	Good	2022-06-27
267			34			Shanghai	Shanghai	College Diploma	Office Personnel and Related Workers	2022-06-27	2022-06-27	2022-04-24	2023-01-29	9weeks1days	1	0	160.00			64	115	55.00			25	15	7-	32-	No		No				No		No	No				Normal	32	Good	2022-06-27
268			32			Jiangsu Province	Shanghai	Undergraduate degree	Office Personnel and Related Workers	2022-06-27	2022-06-27	2022-04-22	2023-01-27	9weeks3days	1	0	159.00			112	131	57.50			29	10	8-	30-	No		No				No		No	No		High-risk pregnancy care，History of pituitary microadenoma 2 years		Normal	33	Good	2022-06-27
269			33			Shandong Province	Non-local Migrant Population	Undergraduate degree	Unclassified Workers	2022-06-27	2022-06-27	2022-04-02	2023-01-07	12weeks2days	1	0	159.00			85	133	70.00				13	7-	32-		No		No	No	No		No	No	No		High-risk pregnancy care BMI≥24		BMI≥24	31	Good	2022-06-27
270			36				Shanghai	Postgraduate Education	Unclassified Workers	2022-06-27	2022-06-27	2022-04-03	2023-01-08	12weeks1days	3	0	157.00			65	107	51.00			34	15	3-4	28-	No		No	No	No		No		No	No				Age≥35	40	Good	2022-06-27
271			33			Zhejiang Province	Non-local permanent residents	Postgraduate Education	Office Personnel and Related Workers	2022-06-27	2022-06-27	2022-04-28	2023-02-02	8weeks4days	1	0	162.00			66	109	47.50			28	14	6-	28-		History of chronic cold-induced hives (urticaria) for over 20 years.	No				No		No	No				BMI＜18.5	32	Fair	2022-06-27
272			29			Jiangsu Province	Non-local permanent residents	Senior Secondary Education	Office Personnel and Related Workers	2022-06-27	2022-06-27	2022-04-13	2023-01-18	10weeks5days	1	0	171.00			61	106	75.00		No	27	12	4-6	28-30	No		Family history of hypertension, and the current blood pressure of the pregnant woman ≥1 Serious genetic diseases （Genetic hyperlipidemia）0/Other Situations0mmHg	No	No	No	No		Radiation	No		High-risk pregnancy care BMI≥24		BMI≥24	27	Good	2022-06-27
273			31			Jiangsu Province	Non-local permanent residents	Undergraduate degree	Office Personnel and Related Workers	2022-06-27	2022-06-27	2022-04-29	2023-02-03	8weeks3days	2	0	167.00			74	125	55.00	Denial of Common Medical History	Progesterone，Heparin	29	15	4-6	28-	No		No				No		No	No		Routine prenatal care		Normal	31	Good	2022-06-27
274			28			Jiangsu Province	Non-local permanent residents	Postgraduate Education	Unclassified Workers	2022-06-27	2022-06-27	2022-04-15	2023-01-20	10weeks3days	1	0	164.00			57	95	51.50			25	14	7-	40-	No		No				No		No	No				Normal	30	Good	2022-06-27
275			32			Shanghai	Shanghai	Undergraduate degree	Office Personnel and Related Workers	2022-06-27	2022-06-27	2022-04-26	2023-01-31	8weeks6days	2	0	164.50			65	118	62.00	Denial of Common Medical History	No	28	12	5-	30-	0	Duodenal ulcer for 1 year (currently not taking medication, reports being cured).	No	No	No		0	No	No	No		Routine prenatal care		Normal	32	Good	2022-06-27
276			33			Jiangsu Province Nantong	Non-local permanent residents	Undergraduate degree	Unclassified Workers	2022-06-27	2022-06-27	2022-04-20	2023-01-25	9weeks5days	2	0	163.00			68	118	59.00			30		5-	27-	No								No	No				Endocrine system diseases,Hepatitis B virus surface antigen positive and liver function Normal	33	Good	2022-06-27
277			36			Shanghai	Shanghai	Undergraduate degree	Unclassified Workers	2022-06-28	2022-06-28	2022-04-04	2023-01-09	12weeks1days	3	1	159.00			82	121	58.00			25	14	4-	35-	No						No		No	No		Pregnancy Monitoring for Advanced Maternal Age Multiparous Women,Pregnancy with Uterine Scar		Age≥35,Scarred uterus	37	Good	2022-06-28
278			34			Zhejiang Province	Shanghai	Undergraduate degree	Unclassified Workers	2022-06-28	2022-06-28	2022-04-10	2023-01-15	11weeks2days	3	1	172.00			73	115	48.00	Denial of Common Medical History		27	16	7-	35-40	0	Examination revealed a liver cyst for 1 year, approximately 1 cm; in 2020, a natural miscarriage at 5 weeks of pregnancy.	0				No		No	No		High-risk pregnancy care BMI＜18.5		BMI＜18.5	36	Good	2022-06-28
279			31			Gansu Province	Shanghai	Postgraduate Education	Skilled Professionals	2022-06-28	2022-06-28	2022-04-24	2023-01-29	9weeks2days	1	0	159.50			51	95	57.00			28	14	6-7	28-34	No						No		No	No		Routine prenatal care		Normal	31	Good	2022-06-28
280			30			329900000000	Shanghai	Undergraduate degree	Unclassified Workers	2022-06-28	2022-06-28	2022-04-30	2023-02-04	8weeks3days	1	0	170.00			74	117	80.00			26	15	5-7	40-	No						No		No	No		High-risk pregnancy care		BMI≥24	35	Good	2022-06-28
281			38			Jiangsu Province	Shanghai	College Diploma	Office Personnel and Related Workers	2022-06-28	2022-06-28	2022-04-24	2023-01-29	9weeks2days	1	0	165.00			75	118	50.00			34	14	7-	31-			No				No		No	No		Pregnancy Monitoring for Advanced Maternal Age Primiparous Women,Personal history of respiratory disease		Age≥35,BMI＜18.5	37	Good	2022-06-28
282			48			Shanghai	Shanghai	Undergraduate degree	Unclassified Workers	2022-06-28	2022-06-28	2022-04-10	2023-01-15	11weeks2days	3	1	160.00			48	108	58.00			28	15	7-	30-	No						No		No	No		Pregnancy Monitoring for Advanced Maternal Age Multiparous Women,Uterine leiomyoma		Age≥40	46	Good	2022-06-28
283			34			Zhejiang Province	Shanghai	Postgraduate Education	Skilled Professionals	2022-06-28	2022-06-28	2022-04-21	2023-01-26	9weeks5days	2	1	177.00			76	111	65.00			26	14	7-	28-	No		No				No		No	No		Pregnancy with Uterine Scar		Scarred uterus	32	Good	2022-06-28
284			34			Hubei Province	Non-local permanent residents	Undergraduate degree	Unclassified Workers	2022-06-28	2022-06-28	2022-04-12	2023-01-17	11weeks	2	1	158.00			74	112	53.50			25	13	6-	36-	No		No				No		No	No		Routine prenatal care		Normal	32	Good	2022-06-28
285			30			Ningxia Hui Autonomous Region	Non-local permanent residents	Undergraduate degree	Unclassified Workers	2022-06-28	2022-06-28	2022-04-25	2023-01-30	9weeks1days	2	0	160.00			63	100	48.00			24	12	6-	32-37		fetal demise or stillbirth	No						No	No		Routine prenatal care		Normal	32	Good	2022-06-28
286			31			Gansu Province	Shanghai	Postgraduate Education	Skilled Professionals	2022-06-28	2022-06-28	2022-04-25	2023-01-30	9weeks1days	1	0	167.50			63	94	54.00			26	14	5-7	27-		appendectomy		No	No	No		No	No	No		Routine prenatal care		Normal	29	Good	2022-06-28
287			33			Hunan Province	Shanghai	Postgraduate Education	Unclassified Workers	2022-06-28	2022-06-28	2022-04-24	2023-01-29	9weeks2days	1	0	168.00			66	125	71.80			30	15	7-	30-	No		No				No		No	No		PCOS,Pregnancy with ovarian cyst		Ovarian cyst≥5cm	31	Good	2022-06-28
288			32			Jiangsu Province	Shanghai	Postgraduate Education	Office Personnel and Related Workers	2022-06-28	2022-06-28	2022-04-26	2023-01-31	9weeks	1	0	172.50			72	120	53.00			29		5-	29-		Thoracoscopic lung bulla resection surgery 15 years ago.		No	No	grandfather hypertension、diabetes	No		No	No		High-risk pregnancy care BMI＜18.5, Possible ovarian cyst，Mixed structures in the left ovary20mm		BMI＜18.5	31	Good	2022-06-28
289			34			Jiangsu Province	Shanghai	Postgraduate Education	Skilled Professionals	2022-06-28	2022-06-28	2022-04-04	2023-01-09	12weeks1days	1	0	170.00			68	107	55.00			28	13	4-6	28-	No		No				No		No	No		High-risk pregnancy care,Hyperthyroidism 3 years，Stopped medication 1.5 years ago		Thyroid disease that does not require medication	33	Good	2022-06-28
290			32			Shanghai	Shanghai	Undergraduate degree	Office Personnel and Related Workers	2022-06-28	2022-06-28	2022-04-04	2023-01-09	12weeks1days	1	0	145.00			93	135	48.00			31	13	6-	28-	No		No				No		No	No		Uterine leiomyoma		Normal	32	Good	2022-06-28
291			32			Shanghai	Shanghai	Undergraduate degree	Office Personnel and Related Workers	2022-06-28	2022-06-28	2022-04-15	2023-01-20	10weeks4days	1	0	165.00			73	101	65.30			28	14	5-	30-	No								No	No		Pregnancy with ovarian cyst		BMI≥24	31	Good	2022-06-28
292			37			Zhejiang Province	Shanghai	Undergraduate degree	Unclassified Workers	2022-06-28	2022-06-28	2022-04-19	2023-01-24	10weeks	1	0	166.00			93	137	55.00			31	12	7-8	28-	No		No					Xiyanping	No	No		Pregnancy Monitoring for Advanced Maternal Age Primiparous Women		Age≥35	37	Good	2022-06-28
293			28			Jiangsu Province	Non-local permanent residents	Undergraduate degree	Office Personnel and Related Workers	2022-06-28	2022-06-28	2022-04-29	2023-02-03	8weeks4days	1	0	160.00			53	104	56.50			27	11	7-	30-37		Nose augmentation surgery in August 2021	No	No	No		No		No	No		Routine prenatal care		Normal	25	Good	2022-06-28
294			41			419900000000	Shanghai	Undergraduate degree	Unclassified Workers	2022-06-28	2022-06-28	2022-04-17	2023-01-22	10weeks2days	2	1	167.00			76	115	53.00	Denial of Common Medical History	Orthomol	39	14	7-	30-	0	appendectomy	0	No	No	No	0	No	No	No		High-risk pregnancy care，Increased nuchal translucency (NT):3.9mm,Pregnancy Monitoring for Advanced Maternal Age Multiparous Women		2|4|Other Situations Yellow alert classification ;Assessment Other Situations:B超提示embryos 颈后皮肤增厚,Age≥40	38	Good	2022-06-28
295			32			Jiangsu Province Nantong	Non-local permanent residents	Other Situations	Office Personnel and Related Workers	2022-06-29	2022-06-29	2022-04-23	2023-01-28	9weeks4days	1	0	161.00			55	108	52.00			30	12	7-	30-	No						No		No	No				Normal	28	Good	2022-06-29
296			35			Jiangsu Province	Non-local permanent residents	Postgraduate Education	Skilled Professionals	2022-06-29	2022-06-29	2022-03-19	2022-12-24	14weeks4days	2	0	162.00			63	120	55.00			27	13	7-	30-60		Immunotherapy with blocking antibodies in July 2021 (received cyclosporine from May 2018 to June 2010), polycystic for 2 years, insulin resistance for 1 year (took metformin from February 2022 to June 4, 2022). Breast nodules for 2 years, regular follow-up.		Unclear	Unclear	Unclear	No		No	No		High-risk pregnancy care，21-07 Blocking antibody（05-18 Cyclosporine to 06-10）,Insulin Resistance 1 years（Taking metformin biguanide 22-02 to 22-06-04）,PCOS 2 years,Pregnancy supervision with a history of embryonic arrest		Normal	34	Good	2022-06-29
297			32			Anhui Province	Shanghai	Undergraduate degree	Office Personnel and Related Workers	2022-06-29	2022-06-29	2022-04-16	2023-01-21	10weeks4days	1	0	180.50			81	139	67.00	Denial of Common Medical History		26	12	6-	30-50	0	IgA nephropathy for 5 years (regular follow-up, normal kidney function, currently not on medication). In March 2021, the female partner tested positive for sperm antibodies and turned negative after taking traditional Chinese medication for 3 months. PCOS for 1 year (ovulation induction treatment from October 2021 to March 2022).	0			Maternal grandfather has hypertension	No		No	No		High-risk pregnancy care，IgA nephropathy 5 years（Normal renal function，Normal renal function，Untreated）,PCOS 1 year		Urinary system diseases，Kidney disease（The current condition is stable and the renal function is normal）	33	Good	2022-06-29
298			34			Henan Province	Non-local permanent residents	Junior Secondary Education	Unclassified Workers	2022-06-29	2022-06-29	2022-04-28	2023-02-02	8weeks6days	3	1	157.00			71	115	44.00			26	14	3-5	28-	No		No				No		No	No		High-risk pregnancy careBMI＜18.5		BMI＜18.5	30	Good	2022-06-29
299			24			Shanghai	Shanghai	College Diploma	Office Personnel and Related Workers	2022-06-29	2022-06-29	2022-04-18	2023-01-23	10weeks2days	1	0	169.00			75	137	60.00			22	14	-	35-	No		No				No		No	No		Routine prenatal care		Normal	22	Good	2022-06-29
300			31			Jiangsu Province	Non-local permanent residents	College Diploma	Unclassified Workers	2022-06-29	2022-06-29	2022-04-23	2023-01-28	9weeks4days			163.00			86	132	92.00	Denial of Common Medical History		28	14	4-5	31-	No		No				No		No	No				BMI≥28	30	Good	2022-06-29
301			28			Anhui Province	Shanghai	Postgraduate Education	Public Servants	2022-06-29	2022-06-29	2022-05-06	2023-02-10	7weeks5days	1	0	171.50			51	100	59.00	Denial of Common Medical History		26	14	6-	28-30	No		No				No		No	No		Routine prenatal care		Normal	26	Good	2022-06-29
302			32			Shanghai	Shanghai	Undergraduate degree	Office Personnel and Related Workers	2022-06-29	2022-06-29	2022-04-23	2023-01-28	9weeks4days	1	0	173.00			63	111	64.00	Denial of Common Medical History	Dydrogesterone Tablets	27	12	5-	30-	No		No				No		No	No		Routine prenatal care		Normal	29	Good	2022-06-29
303			30			Shanghai	Shanghai	Undergraduate degree	Office Personnel and Related Workers	2022-06-29	2022-06-29	2022-04-30	2023-02-04	8weeks4days	1	0	173.50			69	111	58.00			26	13	7-	28-29	No		No	No	No		No		No	No		Routine prenatal care		Normal	33	Good	2022-06-29
304			32			Shandong Province	Shanghai	Postgraduate Education	Unclassified Workers	2022-06-29	2022-06-29	2022-04-19	2023-01-24	10weeks1days	1	0	172.00			68	108	53.00	Denial of Common Medical History	Folic acid	29	15	7-	30-	No		No				No		No	No		High-risk pregnancy care,BMI＜18.5;		BMI＜18.5	29	Good	2022-06-29
305			34			Henan Province	Non-local permanent residents	Postgraduate Education	Skilled Professionals	2022-06-29	2022-06-29	2022-04-23	2023-01-28	9weeks4days	1	0	161.00			60	101	56.50	Denial of Common Medical History	Elevit，Elevit DHA，Levothyroxine	30		5-	33-	No		No				No		No	No		High-risk pregnancy care,History of thyroid cancer，Underwent total thyroidectomy for papillary thyroid carcinoma in 2014, with regular thyroid function tests. Currently taking levothyroxine 112.5 mcg orally once daily.		No metastasis or recurrence after treatment of malignant tumor	34	Good	2022-06-29
306			32			Chongqing municipality	Non-local permanent residents	Undergraduate degree	Office Personnel and Related Workers	2022-06-29	2022-06-29	2022-04-13	2023-01-18	11weeks	1	0	167.50			59	101	57.00			27		7-	32-	No		No		Hepatitis B virus carrier		No		No	No				Prior pelvic surgery	31	Good	2022-06-29
307			38			Shanghai	Shanghai	Undergraduate degree	Office Personnel and Related Workers	2022-06-29	2022-06-29	2022-04-12	2023-01-17	11weeks1days	3	1	167.00			64	102	68.00			28	18	3-5	45-50	No		No				No		No	No				Age≥35,BMI≥24	34	Good	2022-06-29
308			30			Hebei Province	Shanghai	Postgraduate Education	Skilled Professionals	2022-06-29	2022-06-29	2022-05-10	2023-02-14	7weeks1days	1	0	163.00			66	112	52.50			26	12	4-6	40-60		Polycystic ovary syndrome for 1 year (treated with acupuncture and traditional Chinese medication until November 2021).					No		No	No		Routine prenatal care,PCOS 1 year（Acupuncture and Chinese herbal medicine treatment until November 2021.）		Normal	32	Good	2022-06-29
309			31			Heilongjiang Province	Non-local permanent residents	Other Situations	Unclassified Workers	2022-06-29	2022-06-29	2022-05-01	2023-02-05	8weeks3days	1	0	162.00			59	80	52.00			28	12	3-5	28-	No						No		No	No				Normal	30	Good	2022-06-29
310			31			Hubei Province	Shanghai	Postgraduate Education	Office Personnel and Related Workers	2022-06-29	2022-06-29	2022-05-13	2023-02-17	6weeks5days	1	0	160.00			65	98	48.00			29	14	7-	29-	No		No	No	No		No		No	No				Normal	34	Good	2022-06-29
311			39				Shanghai	Undergraduate degree	Unclassified Workers	2022-06-30	2022-06-30	2022-04-29	2023-02-03	8weeks6days	7	1	170.00			71	121	67.50			27	14	5-7	28-		Thyroid malignant tumor	No					Erythromycin	No	No				Age≥35,Adverse obstetric history,No metastasis or recurrence after treatment of malignant tumor	39	Good	2022-06-30
312			28			Anhui Province	Non-local permanent residents	Vocational Secondary Education	Office Personnel and Related Workers	2022-06-30	2022-06-30	2022-04-21	2023-01-26	10weeks	4	1	164.00			70	108	57.00			24	15	4-5	28-	No			No	No	No	No		No	No		Pregnancy complicated by Fungal vaginitis		Prior pelvic surgery	27	Good	2022-06-30
313			35			329900000000	Shanghai	College Diploma	Office Personnel and Related Workers	2022-06-30	2022-06-30	2022-04-12	2023-01-17	11weeks2days	2	0	161.50			70	123	62.00			30		6-	26-		History of conservative treatment for ectopic pregnancy in 2019					No		No	No		Pregnancy supervision with a history of ectopic pregnancy		2|4|Other Situations Yellow alert classification ;Assessment Other Situations:Ectopic pregnancy	34	Good	2022-06-30
314			35				Shanghai	Other Situations	Unclassified Workers	2022-06-30	2022-06-30	2022-05-02	2023-02-06	8weeks3days	1	0	160.00			79	104	62.50			31	13	4-5	26-	No						No		No	No		Pregnancy complicated by cervical polyps		BMI≥24	34	Good	2022-06-30
315			31			Hunan Province	Non-local permanent residents	Postgraduate Education	Office Personnel and Related Workers	2022-06-30	2022-06-30	2022-05-07	2023-02-11	7weeks5days			163.00			72	119	53.00			29	14	5-6	28-	No		No				No		No	No		Pregnancy with ovarian cyst		Normal	29	Good	2022-06-30
316			28			Henan Province	Non-local Migrant Population	Postgraduate Education	Unclassified Workers	2022-06-30	2022-06-30	2022-04-25	2023-01-30	9weeks3days	1	0	162.00			67	116	57.00			25	14	5-	28-	No			No	No	Maternal grandmother has hypertension	No		No	No		Routine prenatal care		Normal	29	Good	2022-06-30
317			36				Shanghai	Undergraduate degree	Unclassified Workers	2022-06-30	2022-06-30	2022-04-24	2023-01-29	9weeks4days	2	1	163.00			72	118	50.00			28	15	7-	28-	No		No				No		No	No				Age≥35,Scarred uterus,Other Situations Pregnancy and childbirth complications	34	Good	2022-06-30
318			34			Jiangsu Province	Shanghai	Postgraduate Education	Unclassified Workers	2022-06-30	2022-06-30	2022-05-11	2023-02-15	7weeks1days	1	0	173.00			82	138	59.00	Denial of Common Medical History	No	32	14	5-7	28-30	No		0				No		No	No				Normal	40	Good	2022-06-30
319			30			Chongqing municipality	Shanghai	Postgraduate Education	Office Personnel and Related Workers	2022-06-30	2022-06-30	2022-04-22	2023-01-27	9weeks6days	1	0	164.50			56	100	58.00			28	15	3-4	28-	No		No				No		No	No		Routine prenatal care		Normal	27	Good	2022-06-30
320			37			509900000000	Shanghai	Postgraduate Education	Office Personnel and Related Workers	2022-07-01	2022-07-01	2022-05-05	2023-02-09	8weeks1days	1	0	161.50			67	103	52.00	Denial of Common Medical History	No	34	14	7-	28-	No		No				No		No	No		Pregnancy Monitoring for Advanced Maternal Age Primiparous Women,High-risk pregnancy care		Age≥35	38	Good	2022-07-01
321			38			Shanghai	Shanghai	Undergraduate degree	Office Personnel and Related Workers	2022-07-01	2022-07-01	2022-04-10	2023-01-15	11weeks5days	2	1	167.00			68	114	50.00	Denial of Common Medical History	No	26	14	6-	35-	No		No				No		No	No		High-risk pregnancy careBMI＜18.5， NT shows a cystic mass in the right fetal abdomen11*11*10mm。,Pregnancy Monitoring for Advanced Maternal Age Multiparous Women		Age≥35,BMI＜18.5	36	Good	2022-07-01
322			37			Jiangxi Province	Shanghai	Postgraduate Education	Unclassified Workers	2022-07-01	2022-07-01	2022-05-02	2023-02-06	8weeks4days	5	2	162.00			60	108	60.00			27	13	-	28-		History of hysteroscopy; in January 2019, induced labor at 4 months of pregnancy due to fetal brain nerve development abnormalities (chromosomal analysis not performed).		No	No	No		No	No	No		Pregnancy Monitoring for Advanced Maternal Age Multiparous Women,High-risk pregnancy care,Pregnancy with Possible ovarian cyst，left ovary ：inner hypoechoic 24*21*20mm,Monitoring of pregnancy with a history of fetal malformation. In January 2019, induced labor history at 4 months of pregnancy due to fetal brain neural development anomaly (chromosomal analysis not performed)		Age≥35,Adverse obstetric history	34	Good	2022-07-01
323			32			Anhui Province	Non-local permanent residents	Undergraduate degree	Unclassified Workers	2022-07-01	2022-07-01	2022-05-04	2023-02-08	8weeks2days	2	1	160.00			63	99	53.00	Denial of Common Medical History		27	14	5-	26-	0	Right ovarian mucinous carcinoma, stage IC, underwent 6 cycles of chemotherapy after surgery (completed in April 2020).	No				No		No	No		High-risk pregnancy care, Personal history of ovarian malignancy: Right ovarian mucinous carcinoma stage Ic, 6 chemotherapy sessions after surgery (ended in April 2020)		No metastasis or recurrence after treatment of malignant tumor	30	Good	2022-07-01
324			30				Non-local permanent residents	Undergraduate degree	Unclassified Workers	2022-07-01	2022-07-01	2022-04-19	2023-01-24	10weeks3days	2	0	164.00			65	111	45.00			23	14	5-7	45-60	No		No				No		No	No		High-risk pregnancy care		BMI＜18.5			2022-07-01
325			30			519900000000	Non-local permanent residents	Undergraduate degree	Unclassified Workers	2022-07-01	2022-07-01	2022-05-02	2023-02-06	8weeks4days	1	0	165.50			63	105	50.00			27	15	5-	29-	No						No		No	No		High-risk pregnancy care，BMI＜18.5;,Possible left tuboovarian ligament cyst，35*35*30mm		BMI＜18.5	42	Good	2022-07-01
326			23			Hunan Province	Non-local permanent residents	Undergraduate degree	Skilled Professionals	2022-07-01	2022-07-01	2022-04-17	2023-01-22	10weeks5days	1	0	156.50			58	93	60.00			21	12	6-7	28-	No		No				No		No	No		High-risk pregnancy careBMI≥24,Hyperprolactinemia		BMI≥24,Endocrine system diseases	33		2022-07-01
327			30			Zhejiang Province	Shanghai	College Diploma	Office Personnel and Related Workers	2022-07-01	2022-07-01	2022-04-21	2023-01-26	10weeks1days			155.00			83	103	49.00			25	13	6-7	30-	No		No				No		No	No		Routine prenatal care		Normal	27	Good	2022-07-01
328			34			Anhui Province	Non-local permanent residents	College Diploma	Office Personnel and Related Workers	2022-07-01	2022-07-01	2022-04-04	2023-01-09	12weeks4days	2	1	162.00			81	132	67.00		No	23	13	5-7	30-	0	History of cesarean section; hypertension during the previous pregnancy	0	No		No	No		No	No		High-risk pregnancy careBMI≥24,Scarred uterus 1 time CS		BMI≥24,Scarred uterus	34	Good	2022-07-01
329			30				Non-local permanent residents	Other Situations		2022-07-01	2022-07-01	2022-04-11	2023-01-16	11weeks4days			169.00			77	115	60.00	Denial of Common Medical History	No	27	14	7-	30-	No		No				No		No	No		High-risk pregnancy care		Prior pelvic surgery			2022-07-01
330			37			Guangdong Province	Shanghai	Undergraduate degree	Unclassified Workers	2022-07-01	2022-07-01	2022-05-04	2023-02-08	8weeks2days	1	0	159.50			71	127	56.00			34	13	6-7	27-28		Right breast nodule discovered in 2018, with regular follow-up examinations.		No	No	No	No		No	No		High-risk pregnancy care,Pregnancy Monitoring for Advanced Maternal Age Primiparous Women		Age≥35	35	Good	2022-07-01
331			35			Zhejiang Province	Non-local permanent residents	Undergraduate degree	Unclassified Workers	2022-07-01	2022-07-01	2022-04-24	2023-01-29	9weeks5days	1	0	164.00			74	114	49.00	Denial of Common Medical History	No	33	13	7-	35-40	No		No				No		No	No		High-risk pregnancy careBMI＜18.5		BMI＜18.5	30	Good	2022-07-01
332			33				Shanghai	Postgraduate Education	Unclassified Workers	2022-07-01	2022-07-01	2022-04-25	2023-01-30	9weeks4days	1	0	170.00			53	101	62.00			30	12	5-7	28-30	No		No				No		No	No				Normal	32	Good	2022-07-01
333			31				Non-local permanent residents	Undergraduate degree	Unclassified Workers	2022-07-01	2022-07-01	2022-04-25	2023-01-30	9weeks4days			160.00			69	106	54.00			29	12	5-7	30-	No						No		No	No		Routine prenatal care		Normal	33	Good	2022-07-01
334			34			Jiangsu Province	Shanghai	Undergraduate degree	Office Personnel and Related Workers	2022-07-01	2022-07-01	2022-04-27	2023-02-01	9weeks2days	1	0	159.50			65	104	48.00			31	13	6-7	30-32	No			No	No	No	No		No	No		Routine prenatal care		Normal	38	Good	2022-07-01
335			28			Anhui Province	Non-local permanent residents	College Diploma	Office Personnel and Related Workers	2022-07-01	2022-07-01	2022-04-23	2023-01-28	9weeks6days	3	1	173.00			63	116	73.00			23	14	7-	28-	No		No				No		No	No		High-risk pregnancy care		BMI≥24	28		2022-07-01
336			36			Shanghai	Shanghai	Undergraduate degree	Skilled Professionals	2022-07-01	2022-07-01	2022-04-28	2023-02-02	9weeks1days	2	1	162.50			60	110	60.00			26	12	6-	30-		Left lung nodule resection via thoracoscopy in 2021 (postoperative adenocarcinoma, no adjuvant therapy required, regular follow-up).	No						No	No		High-risk pregnancy care,Scarred uterus 1 time CS,Pregnancy Monitoring for Advanced Maternal Age Multiparous Women,Lung malignant tumor. Personal history includes left pulmonary nodules resection via thoracoscopy in 2021 (postoperative adenocarcinoma, no adjuvant therapy needed, regular follow-up).		Age≥35,Scarred uterus,No metastasis or recurrence after treatment of malignant tumor	34	Good	2022-07-01
337			32				Shanghai	Undergraduate degree	Unclassified Workers	2022-07-01	2022-07-01	2022-04-22	2023-01-27	10weeks			159.00			63	108	52.00			29	12	5-6	30-	No		No				No		No	No		Routine prenatal care		Normal	31	Good	2022-07-01
338			33			Jiangxi Province	Shanghai	Postgraduate Education	Office Personnel and Related Workers	2022-07-01	2022-07-01	2022-04-22	2023-01-27	10weeks	1	0	159.00			58	110	53.00			31	28	3-5	30-	No			No	No	No		Allergy to hemostatic and anti-inflammatory drugs (specific allergen unclear)	No	No		Routine prenatal care		Normal	33	Good	2022-07-01
339			26			Fujian Province	Non-local permanent residents	Other Situations	Office Personnel and Related Workers	2022-07-01	2022-07-01	2022-04-07	2023-01-12	12weeks1days			155.00			73	112	49.50			24	13	5-6	30-	No						No		No	No		Routine prenatal care		Normal	25	Good	2022-07-01
340			32			Jiangsu Province	Shanghai	Postgraduate Education	Skilled Professionals	2022-07-01	2022-07-01	2022-04-16	2023-01-21	10weeks6days	2	0	162.50			65	117	56.00			29	13	4-6	27-28	No		No				No		No	No		Routine prenatal care		Normal	31	Good	2022-07-01
341			32			Zhejiang Province	Shanghai	Postgraduate Education	Office Personnel and Related Workers	2022-07-01	2022-07-01	2022-04-28	2023-02-02	9weeks1days	1	0	162.50			68	109	55.00			30	12	6-8	28-30	No		No				No		No	No		Routine prenatal care,Pregnancy with Possible ovarian cyst，Left ovary: no echo inside 30*28*28mm		Normal	33	Good	2022-07-01
342			33			Shanxi Province	Non-local permanent residents	Undergraduate degree	Office Personnel and Related Workers	2022-07-01	2022-07-01	2022-04-28	2023-02-02	9weeks1days			159.00			73	121	53.00			31	15	5-7	33-	No						No		No	No		Routine prenatal care		Normal	29	Good	2022-07-01
343			33			Jiangsu Province	Non-local permanent residents	College Diploma	Office Personnel and Related Workers	2022-07-01	2022-07-01	2022-04-17	2023-01-22	10weeks5days	2	0	172.00			75	126	66.00			25	14	5-7	30-	No		No				No		No	No		Routine prenatal care,|Cervical neoplasms		Normal	32	Good	2022-07-01
344			31			Anhui Province Shuzhou	Non-local permanent residents	College Diploma	Skilled Professionals	2022-07-01	2022-07-01	2022-04-21	2023-01-26	10weeks1days	1	0	166.50			78	118	72.00			28	13	5-6	30-31	No		No				No		No	No		High-risk pregnancy care		BMI≥24	31	Fair	2022-07-01
345			31			Henan Province	Non-local permanent residents	College Diploma	Skilled Professionals	2022-07-01	2022-07-01	2022-04-30	2023-02-04	8weeks6days	2	0	160.00			62	89	52.00	Denial of Common Medical History	No	26	14	6-	30-	No		No				No		No	No		High-risk pregnancy care, monitoring of pregnancy with a history of fetal malformation. Previous pregnancy: In June 2021, there was a history of induction due to NT 6.1 mm (sent for fetal chromosome analysis showing duplication of chromosome 18 segment; both parents' chromosomes were normal).		Adverse obstetric history	33	Good	2022-07-01
346			34			Anhui Province	Shanghai	Postgraduate Education	Office Personnel and Related Workers	2022-07-01	2022-07-01	2022-04-30	2023-02-04	8weeks6days	1	0	152.50			58	110	45.00			30	16	7-	30-		On June 6, 2022, TSH: 4.75 uIU/ml. Consulted at Fudan University Zhongshan Hospital, prescribed Euthyrox 12.5 µg once daily, ongoing treatment.		maternal family history of epistaxis	No	No	No		No	No		High-risk pregnancy care,Pregnancy complicated by subclinical HypothyroidismTSH：4.75 uIU/L予 Levothyroxine 12.5ug qd		Endocrine system diseases	28	Good	2022-07-01
347			35			Inner Mongolia Autonomous Region	Shanghai	Postgraduate Education	Unclassified Workers	2022-07-01	2022-07-01	2022-05-05	2023-02-09	8weeks1days	2	0	167.50			55	96	74.00			27	12	5-	25-	No		No				No		No	No		High-risk pregnancy careBMI≥24，Antinuclear antibody positive,Hypothyroidism Levothyroxine 12.5ugqd,Pregnancy supervision with a history of embryonic arrest		BMI≥24,Uncomplicated hypothyroidism requiring medication,2|4|Other Situations Yellow alert classification ;Assessment Other Situations: Antinuclear Antibodies (ANAs) +	31	Good	2022-07-01
348			28			Shanghai	Shanghai	Undergraduate degree	Skilled Professionals	2022-07-02	2022-07-02	2022-05-02	2023-02-06	8weeks5days	1	0	160.00			74	125	81.00	Denial of Common Medical History		25	13	6-7	60-	0		No				No		No	No		Uterine leiomyoma		BMI≥28	30	Good	2022-07-02
349			37			Jiangsu Province	Non-local permanent residents	Undergraduate degree	Unclassified Workers	2022-07-02	2022-07-02	2022-04-28	2023-02-02	9weeks2days	3	1	154.00			60	109	55.00			26	13	5-	30-	No		No				No		No	No		Pregnancy Monitoring for Advanced Maternal Age Multiparous Women,Pregnancy with Uterine Scar		Age≥35,Scarred uterus	36	Good	2022-07-02
350			36			Chongqing municipality	Shanghai	Postgraduate Education	Office Personnel and Related Workers	2022-07-02	2022-07-02	2022-05-03	2023-02-07	8weeks4days	2	1	153.00			61	105	51.00			26	16	5-7	28-	No						No		No	No		Pregnancy Monitoring for Advanced Maternal Age Multiparous Women		Age≥35	34	Good	2022-07-02
351			35			Shanghai	Shanghai	Postgraduate Education	Office Personnel and Related Workers	2022-07-02	2022-07-02	2022-04-23	2023-01-28	10weeks	2	0	160.00			72	112	53.00			27	12	4-5	30-	No		No						No	No		Routine prenatal care		Normal			2022-07-02
352			30			Sichuan Province	Shanghai	Undergraduate degree	Office Personnel and Related Workers	2022-07-04	2022-07-04	2022-04-23	2023-01-28	10weeks2days	2	1	150.00			58	96	43.00	Denial of Common Medical History	Levothyroxine	27	12	7-	30-	0	Hashimoto's hypothyroidism for 5 years, currently on Euthyrox 75 µg once daily.	0	No	No	No	0	No	No	No		High-risk pregnancy care,HypothyroidismHashimoto's thyroiditis 5 years， Levothyroxine 75ug qd now		Uncomplicated hypothyroidism requiring medication	30	Good	2022-07-04
353			30				Non-local permanent residents	Undergraduate degree	Unclassified Workers	2022-07-04	2022-07-04	2022-05-14	2023-02-18	7weeks2days	1	0	156.00			71	106	51.00	Denial of Common Medical History	No	28	12	15-30	28-	0	No	0	No	No	No	0	No	No	No		Routine prenatal care		Normal	28	Good	2022-07-04
354			35				Non-local permanent residents	Undergraduate degree	Unclassified Workers	2022-07-04	2022-07-04	2022-05-15	2023-02-19	7weeks1days	3	0	163.00			70	100	60.00			31	13	5-5	30-	No		No				No		No	No				Prior pelvic surgery			2022-07-04
355			33			Anhui Province	Non-local permanent residents	College Diploma	Unclassified Workers	2022-07-04	2022-07-04	2022-04-22	2023-01-27	10weeks3days	2	0	160.00			69	122	67.50	Denial of Common Medical History	Estradiol Valerate Tablets，Dydrogesterone Tablets，Chinese herbal supplement for pregnancy support,	26	12	4-5	30-	No		No				No		No	No		High-risk pregnancy care		BMI≥24	33	Good	2022-07-04
356			31			Anhui Province Hefei	Non-local permanent residents	Vocational Secondary Education	Unclassified Workers	2022-07-04	2022-07-04	2022-05-08	2023-02-12	8weeks1days	1	0	162.00			119	145	50.00	Denial of Common Medical History	No	23	17	6-	30-	0	Left inguinal hernia repair surgery in 2011	0	No	No	No	No		No	No				Scarred uterus	40	Good	2022-07-04
357			35			Shanghai	Shanghai	Undergraduate degree	Skilled Professionals	2022-07-04	2022-07-04	2022-05-14	2023-02-18	7weeks2days	1	0	158.00			64	109	51.50			30	13	6-	32-	No		No				No		No	No				Normal	33	Good	2022-07-04
358			33			Zhejiang Province	Non-local permanent residents	College Diploma	Office Personnel and Related Workers	2022-07-04	2022-07-04	2022-04-30	2023-02-04	9weeks2days	2	0	157.00			68	118	54.00			29	15	3-5	28-	No			No	No	No		No	No	No		Routine prenatal care		Normal	32	Good	2022-07-04
359			36			Chongqing municipality	Non-local permanent residents	Undergraduate degree	Unclassified Workers	2022-07-04	2022-07-04	2022-04-15	2023-01-20	11weeks3days	2	1	163.00			60	111	55.00			27	14	10-15	26-	No			No			No		No	No		High-risk pregnancy care:Self-reported hypothyroidism during the previous pregnancy,Pregnancy Monitoring for Advanced Maternal Age Multiparous Women		Age≥35	41	Good	2022-07-04
360			35			Zhejiang Province	Shanghai	Postgraduate Education	Office Personnel and Related Workers	2022-07-04	2022-07-04	2022-04-04	2023-01-09	13weeks	1	0	164.00			71	117	57.00			27	16	7-	37-45		PCOS for 10 years, insulin resistance for 1 year (stopped metformin until March 2022).		No	No	No	No		No	No		Routine prenatal care,Insulin Resistance 1 years（metforminBiguanide was discontinued until 22-03 months）,PCOS 10 years		Endocrine system diseases	34	Good	2022-07-04
361			33			Zhejiang ProvinceHangzhou	Non-local permanent residents	Undergraduate degree	Office Personnel and Related Workers	2022-07-04	2022-07-04	2022-04-26	2023-01-31	9weeks6days	1	0	153.00			69	114	49.00	Denial of Common Medical History	No	29	13	7-10	28-	No		No				No		No	No				Other SituationsKidney disease，The current condition is stable and the renal function is normal	30	Good	2022-07-04
362			28			Zhejiang Province	Non-local permanent residents	Senior Secondary Education	Commercial and Service Industry Personnel	2022-07-04	2022-07-04	2022-04-23	2023-01-28	10weeks2days	3	0	164.00			66	95	60.00	Denial of Common Medical History	No	25	13	7-	37-	0	History of LEEP procedure and history of rib cartilage rhinoplasty	0	No	No	No	0	No	No	No		High-risk pregnancy care，HPV52 positive, biopsy CIN3 grade LEEP in an external hospital in 2021（Chronic pathological cervicitis），Self-reported HPV turned negative		2|4|Other Situations Yellow alert classification ;Assessment Other Situations:Loop Electrosurgical Excision Procedure	26	Good	2022-07-04
363			34			Henan Province	Non-local permanent residents	Undergraduate degree	Unclassified Workers	2022-07-04	2022-07-04	2022-04-15	2023-01-20	11weeks3days	1	0	165.00			63	109	64.00	Denial of Common Medical History	Levothyroxine	28	13	5-7	30-35	No		No				No		No	No		High-risk pregnancy care,Subclinical^Hypothyroidism^Euthyrox oral		Endocrine system diseases	32	Good	2022-07-04
364			35			Anhui Province	Non-local permanent residents	Undergraduate degree	Unclassified Workers	2022-07-04	2022-07-04	2022-04-14	2023-01-19	11weeks4days	1	0	163.00			63	104	50.00			31	14	6-7	33-	No		No				No		No	No				Normal	42	Good	2022-07-04
365			30			Jiangsu Province	Shanghai	Postgraduate Education	Office Personnel and Related Workers	2022-07-04	2022-07-04	2022-05-05	2023-02-09	8weeks4days	2	0	171.00			65	110	82.00			24	13	6-7	30-	No		No	No	No		No		No	No				BMI≥28	27	Good	2022-07-04
366			33			Jilin Province	Shanghai	Postgraduate Education	Skilled Professionals	2022-07-04	2022-07-04	2022-04-30	2023-02-04	9weeks2days	1	0	161.00			63	109	72.00			29	13	4-	30-	No		No				No		No	No		High-risk pregnancy care,BMI≥24,Uterine Leiomyomas11mm		BMI≥24	29	Good	2022-07-04
367			30			Henan Province	Non-local permanent residents	Undergraduate degree	Skilled Professionals	2022-07-04	2022-07-04	2022-04-28	2023-02-02	9weeks4days	1	0	164.50			74	110	70.00	Denial of Common Medical History		26	12	5-	30-	No		No				No		No	No		High-risk pregnancy care,BMI≥24		BMI≥24	31	Good	2022-07-04
368			34			Hunan Province	Non-local permanent residents	Postgraduate Education		2022-07-04	2022-07-04	2022-05-10	2023-02-14	7weeks6days	2	1	161.00			62	101	52.00	Denial of Common Medical History	No	29	12	5-7	33-	Urinary system diseases	leep	No				No		Alcohol	No		High-risk pregnancy care,2019 Biopsy HSIL with LEEP (Pathological LSIL)，Regular follow-up，Colposcopy Biopsy in 2020（Chronic pathological cervicitis）		Normal	36		2022-07-04
369			36			Shanghai	Shanghai	Undergraduate degree	Office Personnel and Related Workers	2022-07-05	2022-07-05	2022-04-08	2023-01-13	12weeks4days	1	0	155.00			72	108	50.00			26	10	4-6	25-	No		No				No		No	No		High-risk pregnancy care,Insulin Resistance 2年，Self-reported normal blood sugar, currently taking Gehuazhi 2# qd		Prior pelvic surgery	38	Good	2022-07-05
370			37			Sichuan Province	Non-local permanent residents	Undergraduate degree	Office Personnel and Related Workers	2022-07-05	2022-07-05	2022-04-28	2023-02-02	9weeks5days	2	1	157.00			52	110	62.50			28	15	7-	30-	No			No	No		No		No	No		High-risk pregnancy careBMI≥24,Pregnancy Monitoring for Advanced Maternal Age Multiparous Women		Age≥35,BMI≥24	41	Good	2022-07-05
371			33				Shanghai	Postgraduate Education	Unclassified Workers	2022-07-05	2022-07-05	2022-04-26	2023-01-31	10weeks	1	0	178.00			69	126	65.00	Denial of Common Medical History	No	29	13	5-7	28-	0	hpv58+	0	No	No	No	0	No	No	No		Routine prenatal care		Normal	30	Good	2022-07-05
372			32			Jiangxi Province	Non-local permanent residents	Undergraduate degree	Unclassified Workers	2022-07-05	2022-07-05	2022-04-30	2023-02-04	9weeks3days	2	1	160.00			73	111	57.00			27	15	7-	28-	No		No				No		No	No		Routine prenatal care		Normal	34	Good	2022-07-05
373			36			Henan Province	Non-local permanent residents	Undergraduate degree	Office Personnel and Related Workers	2022-07-05	2022-07-05	2022-04-16	2023-01-21	11weeks3days	1	0	155.50			57	111	46.00	Denial of Common Medical History	Chinese herbal supplement for pregnancy support,	33	14	6-	28-	No		No				No		No	No		High-risk pregnancy care,Pregnancy Monitoring for Advanced Maternal Age Primiparous Women		Age≥35	37	Good	2022-07-05
374			28			Jiangxi Province	Non-local permanent residents	Senior Secondary Education	Unclassified Workers	2022-07-05	2022-07-05	2022-04-24	2023-01-29	10weeks2days	3	1	163.00			56	104	50.00	Denial of Common Medical History	Magnesium aluminum carbonate chewable tablets,	21	12	7-	30-	No		No				No		No	No		Routine prenatal care		Normal	30	Good	2022-07-05
375			33			Henan Province	Non-local permanent residents	Postgraduate Education	Office Personnel and Related Workers	2022-07-05	2022-07-05	2022-04-15	2023-01-20	11weeks4days	1	0	160.00			79	122	90.00	Denial of Common Medical History	No	31	12	-7	35-	No		No				0		No	No		High-risk pregnancy care,Obesity		BMI≥28	35	Good	2022-07-05
376			29			Henan Province	Non-local permanent residents	Undergraduate degree	Skilled Professionals	2022-07-05	2022-07-05	2022-05-10	2023-02-14	8weeks	1	0	164.00			71	106	45.00			26	12	7-	25-27	No		No				No		No	No				BMI＜18.5	30	Good	2022-07-05
377			31			Anhui Province	Non-local permanent residents	Undergraduate degree	Skilled Professionals	2022-07-05	2022-07-05	2022-04-10	2023-01-15	12weeks2days	2	0	169.00			67	98	54.00	Denial of Common Medical History	Ibuprofen、Lianhua Qingwen Capsul	26	14	7-	32-	No		No				No		No	3		High-risk pregnancy care,Hepatitis B surface antigen (HBsAg) positive, anti-HBe positive, and anti-HBc positive,Pregnancy supervision with a history of embryonic arrest		Hepatitis B virus surface antigen positive and liver function Normal	31	Good	2022-07-05
378			32			Zhejiang Province	Shanghai	Undergraduate degree	Office Personnel and Related Workers	2022-07-05	2022-07-05	2022-04-20	2023-01-25	10weeks6days	1	0	165.00			68	126	58.00	Denial of Common Medical History	No	29	12	8-	30-	0	No	0	No	No	No	No		No	No		Routine prenatal care		Normal	33	Good	2022-07-05
379			30			Henan Province	Non-local permanent residents	Undergraduate degree	Unclassified Workers	2022-07-05	2022-07-05	2022-05-03	2023-02-07	9weeks	2	0	166.00			74	125	60.00				12	4-7	28-30	No		No				No		No	No		Routine prenatal care		Normal	31	Good	2022-07-05
380			31			Zhejiang Province	Shanghai	Postgraduate Education	Office Personnel and Related Workers	2022-07-05	2022-07-05	2023-01-26	2023-11-02	0days	1	0	161.50			75	126	42.90			28	13	7-	30-	No		No				No		No	No		High-risk pregnancy care，BMI＜18.5		BMI＜18.5	27	Good	2022-07-05
381			31			Yunnan Province	Shanghai	Postgraduate Education	Unclassified Workers	2022-07-05	2022-07-05	2022-04-15	2023-01-20	11weeks4days	1	0	164.50			77	100	53.00			29	12	5-	28-	No			No	No	No	No		No	No		Routine prenatal care		Normal	32	Good	2022-07-05
382			33			Anhui Province	Non-local permanent residents	Undergraduate degree	Skilled Professionals	2022-07-05	2022-07-05	2022-04-09	2023-01-14	12weeks3days	2	0	165.00			68	120	60.00	Denial of Common Medical History	No	31	16	5-	30-	0	2021-04因TSH偏高，服Euthyrox12.5mg/qd,自诉现Thyroid function is normal	0	No	No		0	No	No	No		High-risk pregnancy care，In April 2021, the patient started taking levothyroxine 12.5mg daily due to elevated TSH levels. The patient now reports that thyroid function is normal.. IVF pregnancy status,IVF pregnancy statusPregnancy supervision with a history of embryonic arrest		Assisted reproductive pregnancy	32	Good	2022-07-05
383			36			China	Shanghai	Postgraduate Education	Unclassified Workers	2022-07-05	2022-07-05	2022-04-27	2023-02-01	9weeks6days	2	1	167.00			64	119	63.00			33	12	7-	30-	No						No		No	No		High-risk pregnancy care,Scarred uterus,Pregnancy Monitoring for Advanced Maternal Age Multiparous Women		Age≥35,Scarred uterus	35	Good	2022-07-05
384			38			Shandong Province	Shanghai	Postgraduate Education	Skilled Professionals	2022-07-05	2022-07-05	2022-04-21	2023-01-26	10weeks5days	2	0	175.50			55	88	70.00			33	15	4-	31-	No			No	No	No		No	No	No		High-risk pregnancy care,Pregnancy Monitoring for Advanced Maternal Age Primiparous Women		Age≥35	32	Good	2022-07-05
385			32			Shanghai	Shanghai	Other Situations	Office Personnel and Related Workers	2022-07-06	2022-07-06	2022-05-04	2023-02-08	9weeks	2	0	167.00			68	117	56.00	Denial of Common Medical History	No	25	10	10-15	31-	No		0			father with diabetes	No		No	No				Normal	35	Good	2022-07-06
386			33			Anhui Province	Non-local permanent residents	College Diploma	Unclassified Workers	2022-07-06	2022-07-06	2022-05-17	2023-02-21	7weeks1days	1	0	161.00			64	97	64.00			29	12	6-	28-30		No		No	No	No		No	No	No				BMI≥24	29	Good	2022-07-06
387			31			Jiangsu Province	Non-local permanent residents	Undergraduate degree	Office Personnel and Related Workers	2022-07-06	2022-07-06	2022-05-06	2023-02-10	8weeks5days	2	1	152.00			60	97	53.00			24	14	5-7	27-	No		No				No		No	No				Scarred uterus,Other SituationsNeurological disorders	36	Good	2022-07-06
388			34			Anhui Province	Non-local permanent residents	Senior Secondary Education	Unclassified Workers	2022-07-06	2022-07-06	2022-04-22	2023-01-27	10weeks5days	3	1	174.50			65	109	70.00			20	13	5-	30-	No		No	No	No		No		No	No		Routine prenatal care		Normal	34	Good	2022-07-06
389			35			Shanghai	Shanghai	Undergraduate degree	Unclassified Workers	2022-07-06	2022-07-06	2022-04-22	2023-01-27	10weeks5days	2	1	168.00			63	111	55.00	Denial of Common Medical History	Elevit	24	15	5-7	28-30	0	ectopic pregnancy	0	No	No	No	No		No	No				Scarred uterus,Endocrine system diseases,No metastasis or recurrence after treatment of malignant tumor	39	Good	2022-07-06
390			30			Zhejiang Province	Non-local permanent residents	Undergraduate degree	Unclassified Workers	2022-07-06	2022-07-06	2022-04-12	2023-01-17	12weeks1days	1	0	170.00			75	128	53.00	Denial of Common Medical History		25	14	6-	45-60	No		0	No	No		No		No	No		High-risk pregnancy careBMI<18.5		BMI＜18.5	30	Good	2022-07-06
391			34			Liaoning Province	Shanghai	Postgraduate Education	Office Personnel and Related Workers	2022-07-06	2022-07-06	2022-05-14	2023-02-18	7weeks4days	3	1	164.00			81	138	84.50			25	14	7-	32-		No					No		No	No		High-risk pregnancy care,Obesity		BMI≥28	34	Good	2022-07-06
392			33			Heilongjiang Province	Non-local permanent residents	Undergraduate degree	Unclassified Workers	2022-07-06	2022-07-06	2022-04-25	2023-01-30	10weeks2days	1	0	173.50			65	121	49.50	Denial of Common Medical History	No	30	14	-	28-	No		No				No		No	No		High-risk pregnancy careBMI<18.5		BMI＜18.5	38	Good	2022-07-06
393			29			329900000000	Shanghai	Undergraduate degree	Office Personnel and Related Workers	2022-07-06	2022-07-06	2022-05-11	2023-02-15	8weeks			167.00			57	110	62.50		No	27	14	7-	30-	No		No				No		No	No		Routine prenatal care		Normal	34	Good	2022-07-06
394			30			Guangxi Zhuang Autonomous Region	Non-local permanent residents	Undergraduate degree	Office Personnel and Related Workers	2022-07-06	2022-07-06	2022-05-06	2023-02-10	8weeks5days	2	0	162.00			60	104	56.00	Denial of Common Medical History	Elevit	27	14	6-	30-	0	Hashimoto's thyroiditis 5 years，Regular monitoring of thyroid function ，no medication taken。	No	No	No		0	No	No	No		High-risk pregnancy careHashimoto's thyroiditis		Thyroid disease that does not require medication	32	Good	2022-07-06
395			34			Jilin Province	Non-local permanent residents	Undergraduate degree	Unclassified Workers	2022-07-06	2022-07-06	2022-05-11	2023-02-15	8weeks	2	0	157.00			70	112	60.00			29	12	5-	30-		Euthyrox0.25 tablets po					No		No	No		High-risk pregnancy care,Hashimoto's thyroiditis BMI≥24		BMI≥24,Uncomplicated hypothyroidism requiring medication	33	Good	2022-07-06
396			35			Hainan Province	Non-local permanent residents	Undergraduate degree	Office Personnel and Related Workers	2022-07-06	2022-07-06	2022-04-24	2023-01-29	10weeks3days	4	0	164.00			68	120	60.00	Denial of Common Medical History	Antiabortifacient	32	12	3-5	23-25	0	发现right ovarian cyst1+年，untreated。	No	Unclear	Unclear		0	No	No	No		High-risk pregnancy care,Pregnancy with a history of multiple induced abortions,Pregnancy with ovarian cyst		Various types of miscarriage ≥3 times	32	Good	2022-07-06
397			35			Jiangsu Province	Shanghai	Undergraduate degree	Unclassified Workers	2022-07-06	2022-07-06	2022-04-23	2023-01-28	10weeks4days	3	2	170.00			65	115	53.00	Denial of Common Medical History	No	25	12	4-7	28-35	No		No	No	No		0	No	No	No		High-risk pregnancy care^BMI<18.5,Scarred uterus^ 2 times CS,Candidal vaginitis		BMI＜18.5, History of various uterine surgeries （ C-S、 Cornual Pregnancy 、 Uterine Leiomyomas myomectomy）≥2	34	Good	2022-07-06
398			30			319900000000	Shanghai	Postgraduate Education	Office Personnel and Related Workers	2022-07-06	2022-07-06	2022-04-12	2023-01-17	12weeks1days	1	0	166.00			58	122	52.00			27	13	5-7	28-	No		No				No		No	No		High-risk pregnancy careHashimoto's thyroiditis		Uncomplicated hypothyroidism requiring medication	31	Good	2022-07-06
399			30			Zhejiang Province	Shanghai	Other Situations		2022-07-06	2022-07-06	2022-05-05	2023-02-09	8weeks6days	1	0	153.00			77	114	45.00			26	12	6-	30-	No		No				No		No	No							2022-07-06
400			30			Zhejiang Province	Non-local permanent residents	Postgraduate Education	Unclassified Workers	2022-07-06	2022-07-06	2022-05-04	2023-02-08	9weeks	1	0	166.00			79	136	50.00	Denial of Common Medical History	No	27	13	7-	28-	No		No				No		No	No		High-risk pregnancy care		BMI＜18.5	29	Good	2022-07-06
401			30			Henan Province	Non-local permanent residents	Undergraduate degree	Office Personnel and Related Workers	2022-07-06	2022-07-06	2022-04-01	2023-01-06	13weeks5days	1	0	170.00			56	110	64.00			27	12	5-	28-	No		No				No		No	No		Routine prenatal care		Normal	29	Good	2022-07-06
402			29			Henan Province	Non-local Migrant Population	Undergraduate degree	Office Personnel and Related Workers	2022-07-06	2022-07-06	2022-05-21	2023-02-25	6weeks4days	1	0	164.50			62	103	52.00			25	14	7-	28-	No		No				No		No	No		Routine prenatal care		Normal	27	Good	2022-07-06
403			27			Jiangxi Province	Non-local permanent residents	Undergraduate degree	Skilled Professionals	2022-07-06	2022-07-06	2022-04-13	2023-01-18	12weeks	1	0	165.00			70	118	53.00			26	13	4-6	29-	No		No				No		No	No		Routine prenatal care		Normal	27	Good	2022-07-06
404			26			Jiangxi Province	Non-local permanent residents	Junior Secondary Education	Unclassified Workers	2022-07-06	2022-07-06	2022-04-11	2023-01-16	12weeks2days	1	0	154.50			55	112	47.00	Denial of Common Medical History	No	24	14	3-5	28-30	No		No				No		No	No		Routine prenatal care		Normal	26	Good	2022-07-06
405			34			Hubei Province	Non-local permanent residents	Undergraduate degree	Office Personnel and Related Workers	2022-07-06	2022-07-06	2022-04-10	2023-01-15	12weeks3days	1	0	163.50			75	120	55.00	Denial of Common Medical History	Levothyroxine	27	14	3-	30-	No		No				No		No	No		Pregnancy complicated by hypothyroidism		Uncomplicated hypothyroidism requiring medication	32	Good	2022-07-06
406			37			Tianjin Municipality	Non-local permanent residents	Postgraduate Education	Skilled Professionals	2022-07-06	2022-07-06	2022-05-03	2023-02-07	9weeks1days	1	0	158.50			76	130	62.00	Denial of Common Medical History	Progesterone	29	14	3-	28-	No		No				No		No	No		Pregnancy Monitoring for Advanced Maternal Age Primiparous Women,High-risk pregnancy careBMI>24		Age≥35,BMI≥24	37	Good	2022-07-06
407			33			Jiangsu Province	Non-local Migrant Population	Undergraduate degree	Skilled Professionals	2022-07-06	2022-07-06	2022-05-03	2023-02-07	9weeks1days	2	0	157.00			55	108	68.00			27	13	3-5	30-		History of adverse pregnancy outcomes in 2019, induced labor at 23 weeks of gestationHistory of adverse pregnancy outcomes in 2019, induced labor at 23 weeks of gestation					No		No	No				BMI≥24,Adverse obstetric history	32	Fair	2022-07-06
408			36			Jiangsu Province	Shanghai	Undergraduate degree	Office Personnel and Related Workers	2022-07-07	2022-07-07	2022-04-22	2023-01-27	10weeks6days	1	0	162.00			63	99	75.00			34	11	5-7	33-40	No		No				No		No	No		Pregnancy Monitoring for Advanced Maternal Age Primiparous Women,High-risk pregnancy careBMI≥28		Age≥35,BMI≥28	38	Good	2022-07-07
409			36			Shandong Province	Non-local Migrant Population	College Diploma	Unclassified Workers	2022-07-07	2022-07-07	2022-04-21	2023-01-26	11weeks	6	1	163.00			68	107	60.00			11	19	10-15	30-	No		No				No		No	No		High-risk pregnancy care,Cesarean section incision pregnancy?		Scarred uterus,2|4|Other Situations Yellow alert classification ;Assessment Other Situations: C-S切口妊娠？	34	Good	2022-07-07
410			36				Shanghai	Postgraduate Education	Unclassified Workers	2022-07-07	2022-07-07	2022-05-08	2023-02-12	8weeks4days	2	1	168.00			64	98	50.00			28	14	7-	30-		lumbar disc protrusion	No						No	No		Routine prenatal care		Normal	33	Good	2022-07-07
411			36			Shanghai	Shanghai	Undergraduate degree	Office Personnel and Related Workers	2022-07-07	2022-07-07	2022-05-04	2023-02-08	9weeks1days	2	1	163.00			70	115	62.00			30	14	7-	30-	No		No				No		No	No		Pregnancy Monitoring for Advanced Maternal Age Multiparous Women,Scarred uterus 1 time CS,High-risk pregnancy care支气管 Asthma.20余年，每年反recurrence 作，发作时激素喷剂使用		Age≥35,Scarred uterus, Respiratory system diseases	38	Good	2022-07-07
412			35			339900000000	Shanghai	Undergraduate degree	Office Personnel and Related Workers	2022-07-07	2022-07-07	2022-04-14	2023-01-19	12weeks	3	1	163.50			74	105	53.00			25	14	7-	28-30	No			No	No	No		No	No	No		A woman with a history of one cesarean section and one myomectomy is currently undergoing high-risk pregnancy care due to her scarred uterus.		History of various uterine surgeries （ C-S、 Cornual Pregnancy 、 Uterine Leiomyomas myomectomy）≥2	41	Good	2022-07-07
413			32			Jiangsu Province	Shanghai	Undergraduate degree	Office Personnel and Related Workers	2022-07-07	2022-07-07	2022-04-26	2023-01-31	10weeks2days	1	0	178.00			68	117	60.00	Denial of Common Medical History	No	27	14	5-	34-	No		0	No	No	No	0		No	No		Routine prenatal care		Normal	30	Good	2022-07-07
414			29			Shandong Province	Non-local permanent residents	Undergraduate degree	Office Personnel and Related Workers	2022-07-07	2022-07-07	2022-05-20	2023-02-24	6weeks6days			156.00			55	102	49.00	Denial of Common Medical History	No	27	13	5-7	45-60	0	No	0	No	No	No	0	No	No	No		Early pregnancy		Normal	28	Good	2022-07-07
415			27			Shandong Province	Non-local permanent residents	College Diploma	Office Personnel and Related Workers	2022-07-07	2022-07-07	2022-05-09	2023-02-13	8weeks3days	1	0	167.50			72	110	56.00	Denial of Common Medical History	No	23	12	7-	22-23	Endocrine system diseases	Chronic hives (urticaria) since childhood, recurring until now, currently not taking medication	Serious genetic disease (hemophilia)	No	No	No	No		Other Situations	No		Routine prenatal care		Normal	26	Good	2022-07-07
416			35			Jiangsu Province	Shanghai	Postgraduate Education	Office Personnel and Related Workers	2022-07-07	2022-07-07	2022-05-17	2023-02-21	7weeks2days	2	0	167.00			70	110	59.00			27	13	5-7	30-		adenomyosis 7 years +	No				No		No	No		Adenomyosis		Uterine Leiomyomas≥5cm	33	Good	2022-07-07
417			36			Anhui Province	Non-local Migrant Population	Vocational Secondary Education	Office Personnel and Related Workers	2022-07-07	2022-07-07	2022-04-02	2023-01-07	13weeks5days	3	1	163.00			60	106	56.00			27	14	5-7	28-	No		No				No		No	No		Early pregnancy,Pregnancy Monitoring for Advanced Maternal Age Multiparous Women		Age≥35	33	Good	2022-07-07
418			38			Jiangxi Province	Shanghai	Postgraduate Education	Public Servants	2022-07-07	2022-07-07	2022-05-11	2023-02-15	8weeks1days			155.00			65	108	49.50	Denial of Common Medical History	Yanlishuang，lifespace，Doppelherz Lutein，Swisserelax&sleep,Apply Piyanping Ointment 2 times, Apply Ma Yinglong Hemorrhoids Ointment 3-5 times	33	13	6-	36-			No						No	No				Age≥35	44	Good	2022-07-07
419			33			Anhui Province	Non-local permanent residents	College Diploma	Office Personnel and Related Workers	2022-07-07	2022-07-07	2022-04-09	2023-01-14	12weeks5days	1	0	170.00			64	108	61.00			29	14	7-	28-	No		No				No		No	No		Routine prenatal care		Normal	31	Good	2022-07-07
420			30			Hubei Province	Non-local permanent residents	Undergraduate degree	Unclassified Workers	2022-07-07	2022-07-07	2022-04-07	2023-01-12	13weeks	1	0	156.00			52	96	42.50			28	13	4-7	28-	No		No				No		No	No		High-risk pregnancy care BMI＜18.5		BMI＜18.5	32	Good	2022-07-07
421			30			Heilongjiang Province	Non-local permanent residents	Undergraduate degree	Unclassified Workers	2022-07-07	2022-07-07	2022-05-06	2023-02-10	8weeks6days	3	0	163.00			62	104	46.00	Denial of Common Medical History	No	28	14	4-6	28-30	No		0	No	No	No	0	No	No	No		High-risk pregnancy care BMI＜18.5		BMI＜18.5	29	Good	2022-07-07
422			38			Jiangxi Province	Non-local permanent residents	College Diploma	Unclassified Workers	2022-07-07	2022-07-07	2022-05-07	2023-02-11	8weeks5days	8	3	164.00			61	97	74.00			23	14	7-	28-	No		No				No		No	No		High-risk pregnancy care,Early pregnancy,Scarred uterus		Age≥35,BMI≥24,Scarred uterus,Adverse obstetric history, Various types of miscarriage ≥3			2022-07-07
423			41			Shanghai	Shanghai	Other Situations	Unclassified Workers	2022-07-07	2022-07-07	2022-05-11	2023-02-15	8weeks1days			160.00			73	122	59.00			40	16	5-7	28-	No		No				No		No	No		Pregnancy Monitoring for Advanced Maternal Age Primiparous Women,IVF pregnancy status		Assisted reproductive pregnancy,Age≥40			2022-07-07
424			39			Shanghai	Shanghai	Undergraduate degree	Office Personnel and Related Workers	2022-07-07	2022-07-07	2022-05-06	2023-02-10	8weeks6days	3	1	156.00			56	101	46.00	Denial of Common Medical History	Vitamin	36	12	6-	30-40	No		No	No	No		0	No	No	No		Pregnancy Monitoring for Advanced Maternal Age Multiparous Women		Age≥35	33	Good	2022-07-07
425			37			Heilongjiang Province	Non-local permanent residents	Postgraduate Education	Office Personnel and Related Workers	2022-07-07	2022-07-07	2022-05-03	2023-02-07	9weeks2days	5	2	162.00			71	114	50.00			24	12	5-6	28-	No		No				No		No	No		Pregnancy Monitoring for Advanced Maternal Age Multiparous Women		Age≥35	34	Good	2022-07-07
426			33			Hubei Province	Non-local permanent residents	College Diploma	Office Personnel and Related Workers	2022-07-07	2022-07-07	2022-05-05	2023-02-09	9weeks	4	1	165.00			65	113	55.00	Denial of Common Medical History	No	23	16	6-7	30-	No		No				No		No	No		HPV infection52,High-risk pregnancy care		2|4|Other Situations Yellow alert classification ;Assessment Other Situations:Cervix HPV Infection	32	Good	2022-07-07
427			31				Non-local permanent residents	Other Situations		2022-07-08	2022-07-08	2022-05-12	2023-02-16	8weeks1days			153.00			69	112	56.00			26	13	4-	30-	No		No				No		No	No		High-risk pregnancy care,Scarred uterus,Ovarian cyst,|Right renal clear cell carcinoma		Ovarian cyst≥5cm,Scarred uterus,No metastasis or recurrence after treatment of malignant tumor			2022-07-08
428			32			Jiangxi Province	Non-local Migrant Population	Undergraduate degree	Office Personnel and Related Workers	2022-07-08	2022-07-08	2022-05-02	2023-02-06	9weeks4days	1	0	160.00			73	123	52.00			31	12	5-7	28-30	No		No					Suspected allergy to cephalosporin	No	No		Routine prenatal care		Normal			2022-07-08
429			36			Jiangsu Province	Shanghai	College Diploma	Office Personnel and Related Workers	2022-07-08	2022-07-08	2022-04-20	2023-01-25	11weeks2days	2	1	160.50			75	102	50.00	Denial of Common Medical History	Ohta's Isan, Bilin Gastralgia Granules (A traditional Chinese medicine for treating stomach pain)	27	15	6-7	25-30	No		No	No	No		0	No	No	No		Uterine Leiomyomaspossible (15mm),Pregnancy Monitoring for Advanced Maternal Age Multiparous Women		Age≥35	35	Good	2022-07-08
430			36			Jiangxi Province	Non-local permanent residents	Postgraduate Education	Skilled Professionals	2022-07-08	2022-07-08	2022-04-22	2023-01-27	11weeks	1	0	165.00			53	92	56.00			33	13	5-	30-	No		No	No	No			Unclear	No	No		Pregnancy Monitoring for Advanced Maternal Age Primiparous Women		Age≥35	34	Good	2022-07-08
431			34			Shanghai	Shanghai	Postgraduate Education	Skilled Professionals	2022-07-08	2022-07-08	2022-04-21	2023-01-26	11weeks1days			162.00			62	104	52.50	Denial of Common Medical History	No	25	14	6-	40-	No		0				No		No	No		Routine prenatal care		Normal	31	Good	2022-07-08
432			36			Zhejiang Province	Shanghai	Postgraduate Education	Office Personnel and Related Workers	2022-07-08	2022-07-08	2022-04-28	2023-02-02	10weeks1days	2	0	163.00			61	98	57.00			27	13	6-	40-48	No						No		No	No		High-risk pregnancy care,Pregnancy Monitoring for Advanced Maternal Age Primiparous Women		Age≥35	36	Good	2022-07-08
433			34			Shandong Province	Non-local permanent residents	Undergraduate degree	Skilled Professionals	2022-07-08	2022-07-08	2022-05-04	2023-02-08	9weeks2days	2	0	168.50			63	96	56.00	Denial of Common Medical History	Dydrogesterone Tablets	32	15	15-30	28-	No		No				No		No	week 4		HPV infection^52+，In November 2021, HPV52+ underwent colposcopy at an external hospital, pathology indicated LSIL. In March 2022, LCT (-).		Normal	33	Good	2022-07-08
434			36			Sichuan Province	Non-local permanent residents	Postgraduate Education	Unclassified Workers	2022-07-08	2022-07-08	2022-04-18	2023-01-23	11weeks4days			163.00			82	115	60.00			31	12	5-	28-35	No						No		No	No		High-risk pregnancy care,Pregnancy Monitoring for Advanced Maternal Age Primiparous Women		Age≥35			2022-07-08
435			34			Jiangsu Province	Shanghai	Postgraduate Education	Office Personnel and Related Workers	2022-07-08	2022-07-08	2022-05-10	2023-02-14	8weeks3days	1	0	163.00			59	105	59.00	Denial of Common Medical History	Propylthiouracil	28	13	3-5	26-28	0	Hyperthyroidism for over 10 years, regular follow-up, currently taking propylthiouracil 1# daily, reports irregular medication adherence.	0	father 肝癌，叔父肺癌， grandmother 癌症Unclear	father hepatitis B	癌症	0	Ornidazole	No	week 5		Bilateral Ovarian cystright anechoic ：60*48*48mm。 left hypoechoic ：39*34*33mm,Hyperthyroidism for over 10 years, regular follow-up, currently taking Propylthiouracil 1# qd, reports irregular medication adherence. ,High-risk pregnancy care,Scarred uterus Post-myomectomy ， diameter0.8cm		Ovarian cyst≥5cm,Prior pelvic surgery,Scarred uterus	31	Good	2022-07-08
436			26			Shanghai	Shanghai	Undergraduate degree	Unclassified Workers	2022-07-08	2022-07-08	2022-05-02	2023-02-06	9weeks4days	1	0	170.00			67	119	55.00			25	13	7-7	30-	No		No						No	No		Routine prenatal care		Normal	26	Good	2022-07-08
437			36			Shanghai	Shanghai	Undergraduate degree	Skilled Professionals	2022-07-08	2022-07-08	2022-05-04	2023-02-08	9weeks2days	1	0	159.00			73	122	55.00	Denial of Common Medical History	No	32	14	5-6	28-	No		No				No		No	No		Pregnancy Monitoring for Advanced Maternal Age Primiparous Women		Age≥35	36	Good	2022-07-08
438			36			Jiangsu Province	Shanghai	College Diploma	Office Personnel and Related Workers	2022-07-08	2022-07-08	2022-05-01	2023-02-05	9weeks5days	1	0	173.00			59	111	56.00			35	15	5-6	28-30		Uterine fibroids found during a physical examination for 2 years, specifics unclear.	No	No	No		No		No	No		Pregnancy complicated byUterine Leiomyomas47*41*36mm,Pregnancy Monitoring for Advanced Maternal Age Primiparous Women,High-risk pregnancy careHistory of Spinal Surgery		Age≥35	34	Good	2022-07-08
439			34			Shanxi Province	Non-local permanent residents	Undergraduate degree	Office Personnel and Related Workers	2022-07-08	2022-07-08	2022-05-02	2023-02-06	9weeks4days	1	0	163.50			52	101	65.00			30	14	6-7	30-	No		No				No		No	No		High-risk pregnancy care,BMI≥24		BMI≥24	34	Good	2022-07-08
440			33			China	Non-local permanent residents	Other Situations	Unclassified Workers	2022-07-08	2022-07-08	2022-05-15	2023-02-19	7weeks5days	1	0	159.00			81	126	65.00	Denial of Common Medical History	Combined Vitamin Vitamin E	27	11	7-	25-	No		No				0		No	No		High-risk pregnancy care,Monitoring of pregnancy with a history of fetal malformation		BMI≥24,Prior pelvic surgery,Adverse obstetric history	33	Good	2022-07-08
441			32			Shandong Province	Shanghai	Postgraduate Education	Skilled Professionals	2022-07-08	2022-07-08	2022-05-05	2023-02-09	9weeks1days	1	0	158.50			64	101	48.00			29	13	4-6	28-	No		No				No		No	No		Major Depressive Disorder		3|4|Other Situations Orange Warning Classification	31	Good	2022-07-08
442			34			Henan Province	Shanghai	Postgraduate Education	Office Personnel and Related Workers	2022-07-08	2022-07-08	2022-05-06	2023-02-10	9weeks			160.00			59	114	47.00	Denial of Common Medical History	Progesterone ZiShenYuTaiWan	28	11	6-	30-	0		No				No		No	No		High-risk pregnancy care		BMI＜18.5	33	Good	2022-07-08
443			28			Anhui Province	Non-local permanent residents	College Diploma	Unclassified Workers	2022-07-08	2022-07-08	2022-04-13	2023-01-18	12weeks2days	1	0	159.00			74	120	48.00			25	14	7-	26-	No		No				No		No	No		High-risk pregnancy care^：Low lying placenta？		Placenta previa	27	Good	2022-07-08
444			33			Shanghai	Non-local permanent residents	College Diploma	Office Personnel and Related Workers	2022-07-08	2022-07-08	2022-05-12	2023-02-16	8weeks1days	3	1	154.00			62	101	45.00			31	16	6-	28-	No		No				No		No	No		Routine prenatal care		Normal	29	Good	2022-07-08
445			37			Hunan Province	Non-local permanent residents	Undergraduate degree	Office Personnel and Related Workers	2022-07-09	2022-07-09	2022-05-10	2023-02-14	8weeks4days	2	0	155.00			61	107	55.00			35	14	7-	90-	No		No				No		No	No		Pregnancy Monitoring for Advanced Maternal Age Primiparous Women		Age≥35	30	Good	2022-07-09
446			28			Hubei Province	Non-local Migrant Population	College Diploma	Unclassified Workers	2022-07-09	2022-07-09	2022-05-05	2023-02-09	9weeks2days	1	0	159.50			73	117	53.00			26	12	5-	28-	No		No				No		No	No		Routine prenatal care		Normal	27	Good	2022-07-09
447			33			Jiangsu Province	Non-local permanent residents	Undergraduate degree	Office Personnel and Related Workers	2022-07-09	2022-07-09	2022-05-02	2023-02-06	9weeks5days	3	0	169.50			69	106	65.00			30	14	3-5	30-	No		0	No	No		No		No	No		Pregnancy supervision with a history of ectopic pregnancy 1 time， Medication therapy		2|4|Other Situations Yellow alert classification ;Assessment Other Situations:Ectopic pregnancy	33	Good	2022-07-09
448			29			Anhui Province	Non-local permanent residents	Undergraduate degree	Unclassified Workers	2022-07-09	2022-07-09	2022-04-17	2023-01-22	11weeks6days	1	0	166.50			58	93	51.50			27	17	3-4	30-	No		No				No		No	No		Routine prenatal care		Normal	31	Good	2022-07-09
449			30			Anhui Province	Non-local permanent residents	Undergraduate degree	Office Personnel and Related Workers	2022-07-09	2022-07-09	2022-04-22	2023-01-27	11weeks1days	2	0	161.00			58	93	53.00			26	13	5-	30-	No		No				No		No	No		High-risk pregnancy carePossible subclinical hypothyroidism:		Uncomplicated hypothyroidism requiring medication	28	Good	2022-07-09
450			35			Shanghai	Shanghai	Undergraduate degree	Office Personnel and Related Workers	2022-07-09	2022-07-09	2022-05-05	2023-02-09	9weeks2days	2	1	159.50			67	117	59.00			25	13	5-6	35-		During the previous pregnancy, had hypothyroidism, took Euthyrox during pregnancy, and postpartum follow-up showed normal thyroid function; had high cholesterol for 2 years (reported high cholesterol), was on statin medication until discontinuation on June 20, 2022					No		No	No		High-risk pregnancy care Hyperlipidemia		Normal	33	Good	2022-07-09
451			34			Jiangsu Province	Shanghai	Postgraduate Education	Office Personnel and Related Workers	2022-07-09	2022-07-09	2022-04-28	2023-02-02	10weeks2days	2	1	160.00			63	100	53.50			26	12	7-	31-60	No		No				No		No	No		Pregnancy with Uterine Scar,Pregnancy with ovarian cyst		Scarred uterus,Ovarian cyst≥5cm	34	Good	2022-07-09
452			27			Shanxi Province	Non-local permanent residents	Undergraduate degree	Office Personnel and Related Workers	2022-07-09	2022-07-09	2022-04-29	2023-02-03	10weeks1days	1	0	166.00			75	117	61.00	Denial of Common Medical History	Progesterone capsule ZiShenYuTaiWan	24	13	7-	31-	No		No				No		No	No		Twin pregnancy dichorionic twins		Twin pregnancy	35	Good	2022-07-09
453			32			Anhui Province	Shanghai	Postgraduate Education	Skilled Professionals	2022-07-09	2022-07-09	2022-04-30	2023-02-04	10weeks	1	0	154.00			55	105	61.00	Denial of Common Medical History	Combined Vitamin	30	14	4-5	34-	No		No				No		No	No		High-risk pregnancy care,BMI≥24		BMI≥24	31	Good	2022-07-09
454			33			Jiangsu Province	Shanghai	Undergraduate degree	Unclassified Workers	2022-07-09	2022-07-09	2022-05-10	2023-02-14	8weeks4days	1	0	160.00			82	121	48.50	Denial of Common Medical History	Progesterone	31	12	7-	28-	No		No	No	No		No		No	No		Routine prenatal care		Normal	29	Good	2022-07-09
455			31			Jiangsu Province盐城	Non-local permanent residents	Undergraduate degree	Unclassified Workers	2022-07-09	2022-07-09	2022-04-29	2023-02-03	10weeks1days	1	0	176.00			78	113	58.50			27	14	9-	35-	No		No				No		No	No		Pregnancy complicated by Thrombocytopenia		Pregnancy complicated by thrombocytopenia （50×10^9/L＜=PLT＜100×10^9/L）without hemorrhage trendy			2022-07-09
456			31			Jiangsu Province	Shanghai	Postgraduate Education	Skilled Professionals	2022-07-09	2022-07-09	2022-04-22	2023-01-27	11weeks1days	1	0	163.00			76	116	54.00			26	13	5-7	30-60	No		No	No	No		No		No	No		Routine prenatal care		Normal	31	Good	2022-07-09
457			35				Shanghai	Undergraduate degree	Unclassified Workers	2022-07-09	2022-07-09	2022-04-19	2023-01-24	11weeks4days	2	0	174.50			64	118	54.00			29	14	7-	28-	No		No				No		No	No		Uterine Leiomyomaspossible，37*32*31mm,High-risk pregnancy careBMI<18.5		BMI＜18.5	33	Good	2022-07-09
458			33			Jiangxi Province	Shanghai	Undergraduate degree	Skilled Professionals	2022-07-09	2022-07-09	2022-05-01	2023-02-05	9weeks6days	1	0	169.00			55	92	52.50			28	14	6-7	30-35	No		No				No		No	No		High-risk pregnancy careBMI＜18.5		BMI＜18.5	32	Good	2022-07-09
459			36				Non-local permanent residents	Postgraduate Education	Unclassified Workers	2022-07-09	2022-07-09	2022-04-28	2023-02-02	10weeks2days	1	0	165.50			69	124	52.50	Denial of Common Medical History	Hydroxychloroquine sulfate，Prednisone acetate tablets，Folic acid	26	15	5-	27-	0	Sjögren's syndrome for 3 years, regular check-ups, currently taking hydroxychloroquine sulfate 200 mg daily and prednisone acetate 5 mg daily until now.	0	No	No	mother hyperlipidemia	No		No	No		High-risk pregnancy care,Pregnancy complicated bySjögrens syndrome for 3 years		without clinical active manifestations Sjögren's Syndrome	32	Good	2022-07-09
460			35			Henan Province	Non-local permanent residents	Undergraduate degree	Skilled Professionals	2022-07-09	2022-07-09	2022-05-13	2023-02-17	8weeks1days	1	0	161.00			55	103	54.00			32	14	4-5	28-	No		No				No		No	No		Pregnancy complicated by Thyroid dysfunction Hashimoto's thyroiditis， Medication therapy ,Uterine Leiomyomas2cm		Uncomplicated hypothyroidism requiring medication	41		2022-07-09
461			29			Shanghai浦东新区	Shanghai	Postgraduate Education	Office Personnel and Related Workers	2022-07-09	2022-07-09	2022-04-29	2023-02-03	10weeks1days	1	0	156.00			74	107	47.00			26	13	5-7	30-	No		No				No		No	No		Routine prenatal care		Normal	33	Good	2022-07-09
462			37			Jiangsu Province Nantong市	Non-local permanent residents	Undergraduate degree	Unclassified Workers	2022-07-09	2022-07-09	2022-05-13	2023-02-17	8weeks1days	1	0	160.00			75	126	60.00			35	11	3-5	35-40	No						No		No	No		High-risk pregnancy care,Uterine leiomyoma,Adenomyosis		Age≥35			2022-07-09
463			36			Shanghai	Shanghai	Postgraduate Education	Skilled Professionals	2022-07-09	2022-07-09	2022-05-16	2023-02-20	7weeks5days	2	1	171.50			68	99	57.50			27	14	5-7	30-	No						No		No	No		Pregnancy Monitoring for Advanced Maternal Age Multiparous Women		Age≥35	36		2022-07-09
464			39				Shanghai	Undergraduate degree	Unclassified Workers	2022-07-09	2022-07-09	2022-05-03	2023-02-07	9weeks4days	1	0	166.00			71	117	54.00			28	12	5-7	28-	No		No				No		No	No		Pregnancy Monitoring for Advanced Maternal Age Primiparous Women		Age≥35	42	Good	2022-07-09
465			37			Shanghai	Shanghai	Undergraduate degree	Unclassified Workers	2022-07-09	2022-07-09	2022-05-14	2023-02-18	8weeks	1	0	162.00			69	102	58.00			35	14	7-	25-	No						No		No	No		High-risk pregnancy care		Age≥35	34	Good	2022-07-09
466			33				Non-local permanent residents	Postgraduate Education	Unclassified Workers	2022-07-09	2022-07-09	2022-04-11	2023-01-16	12weeks5days	2	0	169.00			74	110	50.00		Dienogest Progesterone	28	13	5-7	40-	No		No				No		No	No		High-risk pregnancy care, BMI＜18.5,PCOS 2 years		BMI＜18.5	32		2022-07-09
467			33			Hunan Province	Non-local permanent residents	Postgraduate Education	Unclassified Workers	2022-07-11	2022-07-11	2022-05-03	2023-02-07	9weeks6days	2	1	165.50			72	123	50.00			27	12	5-6	35-	No		No	No	No				No	No		Uterine Leiomyomas15mm		Normal	38	Good	2022-07-11
468			30			Jiangsu Province	Non-local Migrant Population	Undergraduate degree	Office Personnel and Related Workers	2022-07-11	2022-07-11	2022-04-13	2023-01-18	12weeks5days	1	0	159.50			58	104	53.00	Denial of Common Medical History		28	12	7-	28-	0	No	0	No	No	No	No		No	No		Routine prenatal care Right uterine artery notch		Normal	26	Good	2022-07-11
469			31			Sichuan Province	Non-local permanent residents	College Diploma	Office Personnel and Related Workers	2022-07-11	2022-07-11	2022-04-23	2023-01-28	11weeks2days	3	0	167.00			62	101	48.00			30	14	5-	35-	No			No	No	No		No	No	No		High-risk pregnancy care,BMI<18.5,Pregnancy 2 with a history of multiple artificial abortions		BMI＜18.5	36	Good	2022-07-11
470			31			Jiangsu Province	Shanghai	Undergraduate degree	Public Servants	2022-07-11	2022-07-11	2022-05-02	2023-02-06	10weeks	1	0	171.00			73	95	66.00	Denial of Common Medical History	Dydrogesterone	28	14	8-	30-	No		No				No		No	No		Routine prenatal care		Normal	32	Good	2022-07-11
471			30			Jiangsu Province	Non-local permanent residents	Undergraduate degree	Unclassified Workers	2022-07-11	2022-07-11	2022-05-15	2023-02-19	8weeks1days	1	0	170.50			59	121	77.00			30	13	4-	30-		No		No	No	No	No		No	No		High-risk pregnancy careBMI>24		BMI≥24	29	Good	2022-07-11
472			29				Non-local permanent residents	Other Situations	Unclassified Workers	2022-07-11	2022-07-11	2022-05-02	2023-02-06	10weeks	1	0	160.00			76	125	58.00			26	14	7-	28-	No		No				No		No	No				Normal			2022-07-11
473			32			Henan Province	Non-local permanent residents	Undergraduate degree	Office Personnel and Related Workers	2022-07-11	2022-07-11	2022-05-10	2023-02-14	8weeks6days	3	1	155.00			71	118	59.00	Denial of Common Medical History	No	22	14	5-	30-	0		0	No	No	No	0	No	No	No		Cervical neoplasms,High-risk pregnancy careBMI＞24, High-risk pregnancy History of hyperthyroidism		BMI≥24	32	Good	2022-07-11
474			30			Shanghai	Shanghai	Undergraduate degree	Office Personnel and Related Workers	2022-07-11	2022-07-11	2022-05-17	2023-02-21	7weeks6days			164.00			78	118	58.90			26	14	7-	30-	No		No				No		No	No				Normal	32	Good	2022-07-11
475			42			Shanghai	Non-local permanent residents	Senior Secondary Education	Unclassified Workers	2022-07-11	2022-07-11	2022-05-22	2023-02-26	7weeks1days	3	0	164.00			60	105	52.00			36	13	5-	26-	No		No				No		No	No				Age≥40,Adverse obstetric history			2022-07-11
476			37			Jiangsu Province	Non-local permanent residents	Junior Secondary Education	Operational Staff and Associated Individuals	2022-07-11	2022-07-11	2022-03-27	2023-01-01	15weeks1days	6	2	164.50			57	108	52.00			36	18	3-5	29-60	No		No	No	No				No	No		Pregnancy Monitoring for Advanced Maternal Age Multiparous Women, History of multiple miscarriages, including three instances of medical abortion.		Age≥35, Various types of miscarriage ≥3	39	Good	2022-07-11
477			34			Jiangsu Province	Non-local permanent residents	Undergraduate degree	Skilled Professionals	2022-07-11	2022-07-11	2022-04-17	2023-01-22	12weeks1days	4	1	152.50			58	94	53.00			28	15	6-	28-	No		No					No	No	No		Routine prenatal care,Scarred uterus		Scarred uterus	31	Good	2022-07-11
478			39			Anhui Province	Shanghai	Undergraduate degree	Unclassified Workers	2022-07-11	2022-07-11	2022-05-11	2023-02-15	8weeks5days	3	1	165.50			76	118	62.00	Denial of Common Medical History	Chinese herbal supplement for pregnancy support,	26	16	6-7	25-31	0		0	No	No	No	No		No	No		Pregnancy Monitoring for Advanced Maternal Age Multiparous Women,Scarred uterus,High-risk pregnancy care,Proteinuria during pregnancy		Age≥35,Scarred uterus,Thyroid disease that does not require medication	40	Good	2022-07-11
479			31			321000000000	Shanghai	Postgraduate Education	Office Personnel and Related Workers	2022-07-11	2022-07-11	2022-05-23	2023-02-27	7weeks	1	0	166.00			81	123	75.00	Denial of Common Medical History	Levothyroxine	27	14	3-4	30-	0		0	No	No		0	Unclear	No	No				BMI≥24,Endocrine system diseases	27	Good	2022-07-11
480			34			Shanghai	Shanghai	Undergraduate degree	Unclassified Workers	2022-07-11	2022-07-11	2022-05-23	2023-02-27	7weeks			160.00			71	114	52.00	Denial of Common Medical History	Folic acid，Combined Vitamin，Vitamin C，Lutein	28	14	5-	30-	0		0	血小板减少	No	长辈 Colon cancer	0	No	No	No				Normal	41	Good	2022-07-11
481			32			Hubei Province	Non-local permanent residents	Undergraduate degree	Office Personnel and Related Workers	2022-07-12	2022-07-12	2022-04-18	2023-01-23	12weeks1days	3	1	152.00			56	86	50.00			28	14	5-	30-		Hepatitis B 'small three positives' for over 7 years, with regular follow-up and normal liver function.		No	No	No		No	No	No		Hepatitis B surface antigen (HBsAg) positive, anti-HBe positive, and anti-HBc positive		Hepatitis B virus surface antigen positive and liver function Normal	32	Good	2022-07-12
482			32				Non-local permanent residents	Postgraduate Education	Unclassified Workers	2022-07-12	2022-07-12	2022-05-12	2023-02-16	8weeks5days	1	0	163.00			63	113	45.50			29	15	5-7	35-45	No		No				No		No	No		High-risk pregnancy care		BMI＜18.5	28	Good	2022-07-12
483			36			Shanghai	Shanghai	Undergraduate degree	Office Personnel and Related Workers	2022-07-12	2022-07-12	2022-05-19	2023-02-23	7weeks5days	1	0	158.00			83	129	66.00			33	12	5-7	30-	No						No		No	No		High-risk pregnancy care,Pregnancy Monitoring for Advanced Maternal Age Primiparous Women		Age≥35,BMI≥24	42	Good	2022-07-12
484			35			Henan Province	Shanghai	Postgraduate Education	Skilled Professionals	2022-07-12	2022-07-12	2022-05-07	2023-02-11	9weeks3days	1	0	166.00			77	126	54.00	Denial of Common Medical History	Tegretol Carbamazepine、Levetiracetam、Lexapro	26	12	7-	30-35	0	Has had epilepsy for over 19 years and is currently being treated with Lamotrigine, Carbamazepine, and Levetiracetam. In May 2020, there was a major seizure due to missed medication. Eighteen years ago, had thrombocytopenic purpura, which the patient reports has been cured	0				0	No	No	No		Pregnancy complicated by epilepsy ,Pregnancy with ovarian cyst Luteinized cyst may,High-risk pregnancy care Thrombocytopenia		Epilepsy (simple partial seizures)	34	Good	2022-07-12
485			30			Anhui Province	Shanghai	College Diploma	Unclassified Workers	2022-07-12	2022-07-12	2022-05-10	2023-02-14	9weeks	1	0	165.00			56	109	65.00	Denial of Common Medical History		28	12	7-	30-	No		No	No	No		0	No	No	No		Routine prenatal care		Normal	29	Good	2022-07-12
486			37			Henan Province	Non-local permanent residents	Junior Secondary Education	Commercial and Service Industry Personnel	2022-07-12	2022-07-12	2022-04-26	2023-01-31	11weeks	6	3	160.50			72	117	75.00			36	12	3-	30-	No		No				No		No	No		Scarred uterus 3 times CS,High-risk pregnancy care,BMI>28,Pregnancy Monitoring for Advanced Maternal Age Multiparous Women,Diabetes complicated with pregnancy		Age≥35,Prior pelvic surgery,BMI≥28, History of various uterine surgeries （ C-S、 Cornual Pregnancy 、 Uterine Leiomyomas myomectomy）≥2 , Diabetes requiring medication	32	Good	2022-07-12
487			33			Henan Province	Shanghai	Postgraduate Education	Office Personnel and Related Workers	2022-07-12	2022-07-12	2022-05-04	2023-02-08	9weeks6days	1	0	159.00			74	118	56.00			27	12	5-6	28-35	No		No				No		No	No		Hepatitis B surface antigen (HBsAg), hepatitis B e antigen (HBeAg), and anti-hepatitis B core antibody (anti-HBc) positive,Uterine Leiomyomas,Pregnancy complicated by Kidney stone		Hepatitis B virus surface antigen positive and liver function Normal,Uterine Leiomyomas≥5cm	30	Good	2022-07-12
488			30			Hubei Province	Non-local permanent residents	Undergraduate degree	Skilled Professionals	2022-07-12	2022-07-12	2022-05-03	2023-02-07	10weeks	1	0	165.50			66	113	50.00	Denial of Common Medical History	Folic acid	28	15	5-7	32-35	0	Thyroid antibodies have been elevated for over 1 year, with regular follow-up showing normal thyroid function, and no medication taken.	No	No	No		0	No	No	No		High-risk pregnancy care,BMI<18.5		BMI＜18.5	30	Good	2022-07-12
489			34			Hunan Province	Non-local permanent residents	Undergraduate degree	Unclassified Workers	2022-07-12	2022-07-12	2022-04-17	2023-01-22	12weeks2days	1	0	160.00			59	118	55.00			28	14	4-5	28-	No			Grandmother with diabetes				No	No	No		Routine prenatal care		Normal	37	Good	2022-07-12
490			35			Shanghai	Shanghai	Undergraduate degree	Unclassified Workers	2022-07-12	2022-07-12	2022-04-21	2023-01-26	11weeks5days			160.00			63	109	46.00					-	-	No		No				No		No	No		High-risk pregnancy care,Scarred uterus		BMI＜18.5,Uterine scar (interval from last uterine surgery <18 months)			2022-07-12
491			37			Shaanxi Province	Non-local permanent residents	Undergraduate degree	Skilled Professionals	2022-07-12	2022-07-12	2022-04-22	2023-01-27	11weeks4days	2	1	160.00			62	88	55.00			29	16	4-5	28-	No		No	No	No			No	No	No		Pregnancy Monitoring for Advanced Maternal Age Multiparous Women,Scarred uterus 1 time CS		Age≥35,Scarred uterus	35	Good	2022-07-12
492			33				Non-local permanent residents	Undergraduate degree	Unclassified Workers	2022-07-12	2022-07-12	2022-05-13	2023-02-17	8weeks4days			178.00			69	120	67.00			31	13	7-7	28-	No		No				No		No	No		Routine prenatal care		Normal	31	Good	2022-07-12
493			33			Jiangsu Province	Non-local permanent residents	College Diploma	Operational Staff and Associated Individuals	2022-07-12	2022-07-12	2022-05-09	2023-02-13	9weeks1days	1	0	158.50			67	119	78.00			26	15	7-	28-32	No		No				No		No	No		High-risk pregnancy careBMI>28		BMI≥28	32	Good	2022-07-12
494			38				Non-local permanent residents	Undergraduate degree	Unclassified Workers	2022-07-12	2022-07-12	2022-04-19	2023-01-24	12weeks	1	0	163.00			73	106	59.00			32	12	5-7	28-30	No		No				No		No	No		High-risk pregnancy care,Pregnancy Monitoring for Advanced Maternal Age Primiparous Women		Age≥35	34	Good	2022-07-12
495			31			Henan Province	Non-local permanent residents	Undergraduate degree	Office Personnel and Related Workers	2022-07-12	2022-07-12	2022-05-04	2023-02-08	9weeks6days	2	0	160.00			66	111	61.00	Denial of Common Medical History	No	29	12	5-7	30-	No		0				No		No	No		Routine prenatal care		Normal	31	Good	2022-07-12
496			33			419900000000	Shanghai	Undergraduate degree	Office Personnel and Related Workers	2022-07-12	2022-07-12	2022-05-01	2023-02-05	10weeks2days	2	0	167.00			54	99	52.50	Denial of Common Medical History	Allylestrenol Tablets	28	15	7-	30-	0	During pregnancy, TSH was found to be elevated, and Euthyrox 12.5 mg is taken once daily.	No	No	No		0		No	No		High-risk pregnancy carePossible subclinical hypothyroidism:		Uncomplicated hypothyroidism requiring medication	31	Good	2022-07-12
497			29			Shanghai	Shanghai	Undergraduate degree	Unclassified Workers	2022-07-12	2022-07-12	2022-04-21	2023-01-26	11weeks5days	1	0	155.00			81	125	48.90			26	12	5-7	28-30	No		No				No		No	No		High-risk pregnancy care,Post-right ovarian dermoid cyst removal surgery		Prior pelvic surgery	31	Good	2022-07-12
498			33			Shanghai	Shanghai	Postgraduate Education	Skilled Professionals	2022-07-12	2022-07-12	2022-04-27	2023-02-01	10weeks6days	2	1	158.00			61	96	51.00	Denial of Common Medical History	Progesterone，Hydroxychloroquine sulfate，Aspirin Enteric-coated Tablets，Heparin注射	25	15	5-7	30-45	No		No				No		No	No		High-risk pregnancy care,Scarred uterus		Scarred uterus,Prior pelvic surgery	32	Good	2022-07-12
499			39			Hubei Province	Non-local permanent residents	College Diploma	Office Personnel and Related Workers	2022-07-13	2022-07-13	2022-05-06	2023-02-10	9weeks5days	3	0	163.00			79	116	49.00	Denial of Common Medical History	Progesterone，Oral liquid	26	14	4-6	26-28	No		No				No		smooking	No		High-risk pregnancy careBMI＜18.5,Pregnancy Monitoring for Advanced Maternal Age Primiparous Women,Uterine Leiomyomaspossible，84*70*80mm,Pregnancy supervision with a history of embryonic arrest2		Age≥35,BMI＜18.5,Uterine Leiomyomas≥5cm	39	Good	2022-07-13
500			31			Anhui Province	Non-local permanent residents	College Diploma	Office Personnel and Related Workers	2022-07-13	2022-07-13	2022-04-28	2023-02-02	10weeks6days	1	0	161.00			69	113	56.00	Denial of Common Medical History	No	28	14	4-6	28-	No		0	No	No	No	No		No	No		Routine prenatal care		Normal	33	Good	2022-07-13
501			35			Anhui Province	Non-local permanent residents	Undergraduate degree	Office Personnel and Related Workers	2022-07-13	2022-07-13	2022-04-25	2023-01-30	11weeks2days	5	0	160.00			58	91	62.00	Denial of Common Medical History	Dydrogesterone Tablets，Aspirin Enteric-coated Tablets，Estradiol Valerate Tablets，Progesterone injection ，HCG injection solution，Chinese herbal supplement for pregnancy support,，Ciclosporin ，Hydroxychloroquine sulfate，Low Molecular Weight Heparin	27	14	6-7	30-	No		No				No		No	No				Assisted reproductive pregnancy, Various types of miscarriage ≥3 ,BMI≥24,Prior pelvic surgery	34	Good	2022-07-13
502			27			Hunan Province	Non-local permanent residents	College Diploma	Office Personnel and Related Workers	2022-07-13	2022-07-13	2022-04-27	2023-02-01	11weeks	1	0	158.00			70	120	58.00	Denial of Common Medical History	Antiabortifacient	27	14	6-7	30-	No		No				No		No	No				Normal			2022-07-13
503			36			Zhejiang Province	Non-local Migrant Population	Junior Secondary Education	Commercial and Service Industry Personnel	2022-07-13	2022-07-13	2022-04-29	2023-02-03	10weeks5days	4	1	156.00			50	90	52.50	Denial of Common Medical History	No	35	13	5-	33-	No		No				No		No	No		Pregnancy Monitoring for Advanced Maternal Age Multiparous Women,Scarred uterus 1 time CS,HPV infection81,Pregnancy supervision with a history of embryonic arrest一		Age≥35,Scarred uterus,2|4|Other Situations Yellow alert classification ;Assessment Other Situations:HPVInfection	40	Good	2022-07-13
504			35			Shaanxi Province	Shanghai	Postgraduate Education	Skilled Professionals	2022-07-13	2022-07-13	2022-04-22	2023-01-27	11weeks5days	2	0	156.50			75	119	63.00	Denial of Common Medical History	Dydrogesterone Tablets、Metformin tablets、Aspirin Enteric-coated Tablets、PlaquenilHydroxychloroquine sulfate	28	12	5-7	32-35	0	Since January 2022, due to abnormal tests for thrombophilia, taking aspirin 25 mg three times daily until now; insulin resistance for 6 months, taking metformin until 6 weeks of pregnancy; positive ANA for 6 months, taking SLE (Sinequan) since May 25 until now	0	No	No	No	0	No	No	No		High-risk pregnancy care^BMI≥24，Antinuclear antibody weakly positive,Insulin Resistance^ Half a year, Congenital transposition of kidney ^右肾		BMI≥24,2|4|Other Situations Yellow alert classification ;Assessment Other Situations: Antinuclear Antibodies (ANAs) 弱 + ，Insulin Resistance	35	Good	2022-07-13
505			36			Jiangxi Province	Non-local Migrant Population	College Diploma	Unclassified Workers	2022-07-13	2022-07-13	2022-04-25	2023-01-30	11weeks2days	4	1	162.00			59	118	44.00	Denial of Common Medical History	No	27	16	10-	45-	No		No				No		No	No		High-risk pregnancy careBMI＜18.5,Pregnancy Monitoring for Advanced Maternal Age Multiparous Women,Scarred uterus一 ,Hyperthyroidism ,Pregnancy supervision with a history of embryonic arrest一		Age≥35,BMI＜18.5,Scarred uterus,Endocrine system diseases	38	Good	2022-07-13
506			36			Inner Mongolia Autonomous Region古	Non-local permanent residents	Postgraduate Education	Skilled Professionals	2022-07-13	2022-07-13	2022-04-04	2023-01-09	14weeks2days	1	0	163.00			74	114	45.00		Progesterone	30	15	7-	28-	No		0				No		No	No		Routine prenatal care,Abnormal bilateral uterine artery notching on prenatal screening ultrasound		Normal	34	Good	2022-07-13
507			33			Shaanxi Province	Non-local permanent residents	Postgraduate Education	Skilled Professionals	2022-07-13	2022-07-13	2022-04-26	2023-01-31	11weeks1days	1	0	167.50			64	98	50.00			30	15	5-6	30-60	No		No				No		No	No		High-risk pregnancy care BMI＜18.5,PCOS 1 year		BMI＜18.5, that do not require medication Other SituationsEndocrine system diseases	32	Good	2022-07-13
508			29			Jiangsu Province	Non-local permanent residents	Senior Secondary Education	Unclassified Workers	2022-07-13	2022-07-13	2022-04-12	2023-01-17	13weeks1days	1	0	150.00			70	125	50.00	Denial of Common Medical History	No	27	15	7-	28-	0	Twenty years ago, underwent exploratory laparotomy due to liver contusion and laceration from trauma.	0	No	No	No	No		No	No		Routine prenatal care		Normal	33	Good	2022-07-13
509			34			Shanghai	Shanghai	Undergraduate degree	Office Personnel and Related Workers	2022-07-13	2022-07-13	2022-04-19	2023-01-24	12weeks1days	1	0	167.00			72	121	75.00	Denial of Common Medical History	Levothyroxine	30	13	5-7	28-30	No		No				No		No	No				BMI≥24,Endocrine system diseases,Assisted reproductive pregnancy	36	Good	2022-07-13
510			37			Jiangxi Province	Non-local permanent residents	Undergraduate degree	Commercial and Service Industry Personnel	2022-07-13	2022-07-13	2022-05-11	2023-02-15	9weeks	2	0	166.00			50	91	51.00			33	12	5-	25-	No		No				No		No	No		Uterine Leiomyomaspossible，16*15*15mm,Pregnancy Monitoring for Advanced Maternal Age Primiparous Women, High-grade squamous intraepithelial lesion of the cervix Post-LEEP procedure		Age≥35,2|4|Other Situations Yellow alert classification ;Assessment Other Situations:Post-conization of the Cervix.	41	Good	2022-07-13
511			31			Jiangsu Province	Non-local permanent residents	Undergraduate degree	Office Personnel and Related Workers	2022-07-13	2022-07-13	2022-04-30	2023-02-04	10weeks4days	2	0	163.50			82	129	57.00		Dydrogesterone Tablets	28	16	5-	30-	No		No				No		No	No		Routine prenatal care		Normal	28	Good	2022-07-13
512			42			Hubei Province	Shanghai	Postgraduate Education	Office Personnel and Related Workers	2022-07-13	2022-07-13	2022-05-02	2023-02-06	10weeks2days	6	1	165.00			70	106	53.50	Denial of Common Medical History	Elevit Progesterone	28	13	3-5	30-	0	Has had Hepatitis B 'big three positives' since childhood, reports normal liver function, currently not taking medication, and undergoes regular check-ups.	0	No	mother with hepatitis B.史		0	No	No	No		High-risk pregnancy care,Pregnancy Monitoring for Advanced Maternal Age Multiparous Women,Pregnancy supervision with a history of embryonic arrest^2 ,Scarred uterus^1 , Uterine diverticulum ^ Cesarean section 切口,Hepatitis B surface antigen carriers,History of multiple miscarriages		Scarred uterus,Hepatitis B virus surface antigen positive and liver function Normal,Age≥40, Various types of miscarriage ≥3 ,2|4|Other Situations Yellow alert classification ;Assessment Other Situations: C-S incision diverticulum	43	Good	2022-07-13
513			36			Shanghai	Shanghai	Undergraduate degree	Skilled Professionals	2022-07-13	2022-07-13	2022-05-20	2023-02-24	7weeks5days	3	1	160.00			67	121	46.00			35	14	6-7	40-			No	No	No			No	No	No				Age≥35,BMI＜18.5,Scarred uterus	35	Good	2022-07-13
514			31			Jiangsu Province	Shanghai	Undergraduate degree	Public Servants	2022-07-14	2022-07-14	2022-04-20	2023-01-25	12weeks1days	1	0	176.50			68	123	74.00			27	13	6-7	25-	No		No				No		No	No		IVF pregnancy status,Uterine Leiomyomas2cm		Assisted reproductive pregnancy,Prior pelvic surgery	28	Good	2022-07-14
515			35			Jiangsu Province	Non-local permanent residents	Other Situations	Unclassified Workers	2022-07-14	2022-07-14	2022-04-18	2023-01-23	12weeks3days	3	0	165.00			78	125	50.00			31	16	5-	28-	No		No	No	No			No	No	No		High-risk pregnancy care, BMI<18.5		BMI＜18.5	32	Good	2022-07-14
516			30			Jiangsu Province	Non-local permanent residents	Undergraduate degree	Office Personnel and Related Workers	2022-07-14	2022-07-14	2022-05-18	2023-02-22	8weeks1days	1	0	152.00			64	113	38.00			27	12	6-7	33-			No				No		No	No		BMI＜18.5		BMI＜18.5	33	Good	2022-07-14
517			32			Fujian Province	Non-local permanent residents	College Diploma	Office Personnel and Related Workers	2022-07-14	2022-07-14	2022-04-17	2023-01-22	12weeks4days	3	2	167.00			58	112	52.00	Denial of Common Medical History	Da Xi for stomach	24	16	7-8	31-	No		Serious genetic diseases （Genetic hyperlipidemia）	No	No	No	Procaine	No	Alcohol	No		Routine prenatal care		Normal	33	Good	2022-07-14
518			31			329900000000	Shanghai	Undergraduate degree	Skilled Professionals	2022-07-14	2022-07-14	2022-05-03	2023-02-07	10weeks2days			170.00			58	97	60.00	Denial of Common Medical History	No	25	14	6-7	30-	0	/	0	No	No	No	0	Air dust mites	No	No				Normal	30	Good	2022-07-14
519			30			Shanghai	Shanghai	Undergraduate degree	Skilled Professionals	2022-07-14	2022-07-14	2022-05-09	2023-02-13	9weeks3days	1	0	170.50			62	106	64.00			28	15	6-	28-	No			No	No			No	No	No		Routine prenatal care		Prior pelvic surgery	30	Good	2022-07-14
520			37			Henan Province	Shanghai	Postgraduate Education	Office Personnel and Related Workers	2022-07-14	2022-07-14	2022-04-13	2023-01-18	13weeks1days	2	1	168.00			63	98	56.00			36	14	7-	28-	No		No				No		No	No		Pregnancy Monitoring for Advanced Maternal Age Multiparous Women		Age≥35	29	Good	2022-07-14
521			35			Zhejiang Province	Shanghai	Undergraduate degree	Office Personnel and Related Workers	2022-07-14	2022-07-14	2022-05-20	2023-02-24	7weeks6days	2	0	148.50			76	116	46.00	Denial of Common Medical History	No	34	13	5-6	29-	No		No	No	No		0	No	No	No		Routine prenatal care		Normal	39	Good	2022-07-14
522			32			Zhejiang Province	Shanghai	Vocational Secondary Education	Office Personnel and Related Workers	2022-07-14	2022-07-14	2022-05-07	2023-02-11	9weeks5days			160.00			91	148	70.00	Denial of Common Medical History		24	13	5-30	27-	No		No				No		No	No		IVF pregnancy status,|BMI≥24		BMI≥24	33	Good	2022-07-14
523			32			Shanghai	Shanghai	Undergraduate degree	Unclassified Workers	2022-07-14	2022-07-14	2022-05-03	2023-02-07	10weeks2days	2	0	158.50			65	125	62.50	Denial of Common Medical History		28	15	5-6	25-58	No		No				No		No	No		High-risk pregnancy careBMI>24		BMI≥24,Prior pelvic surgery	31	Good	2022-07-14
524			32			Heilongjiang Province	Shanghai	Postgraduate Education	Skilled Professionals	2022-07-14	2022-07-14	2022-04-21	2023-01-26	12weeks	1	0	168.00			68	118	56.00	Denial of Common Medical History	No	28	12	4-6	28-	No		No				No		No	No		Routine prenatal care		Normal	32	Good	2022-07-14
525			34			Jiangsu Province	Non-local permanent residents	Undergraduate degree	Office Personnel and Related Workers	2022-07-14	2022-07-14	2022-04-15	2023-01-20	12weeks6days	1	0	158.00			72	110	50.00			31	12	7-	32-35	No		No				No		No	No		Cervical neoplasms		Normal	31	Good	2022-07-14
526			32			Shanghai	Shanghai	Undergraduate degree	Unclassified Workers	2022-07-14	2022-07-14	2022-04-17	2023-01-22	12weeks4days	2	0	163.00			67	129	51.00	Denial of Common Medical History		29	15	9-	28-	No		No				No		No	No		Pregnancy complicated by Hashimoto's thyroiditis，Not taking medicine		Thyroid disease that does not require medication	28	Good	2022-07-14
527			32			Shanghai	Shanghai	College Diploma	Office Personnel and Related Workers	2022-07-14	2022-07-14	2022-05-14	2023-02-18	8weeks5days	1	0	171.00			72	131	53.00			30	14	7-	26-	No		No				No		No	No		High-risk pregnancy care,BMI<18.5		BMI＜18.5	41	Good	2022-07-14
528			30			Shanghai	Shanghai	Undergraduate degree	Unclassified Workers	2022-07-14	2022-07-14	2022-04-24	2023-01-29	11weeks4days	1	0	160.00			63	98	52.00			27	13	6-	40-	No							No	No	No		Routine prenatal care		Normal	28	Good	2022-07-14
529			38			Shanghai	Shanghai	Undergraduate degree	Office Personnel and Related Workers	2022-07-14	2022-07-14	2022-04-29	2023-02-03	10weeks6days	1	0	169.00			73	122	57.50			36		7-	28-30	No		No				No		No	No		Pregnancy Monitoring for Advanced Maternal Age Primiparous Women		Age≥35	41	Good	2022-07-14
530			35			Shanghai	Shanghai	Undergraduate degree	Office Personnel and Related Workers	2022-07-15	2022-07-15	2022-05-27	2023-03-03	7weeks	1	0	165.00			74	118	56.00			27	12	5-7	28-30	No			No	No	No	No		No	No		Routine prenatal care		Normal	37	Good	2022-07-15
531			36			Tianjin Municipality	Shanghai	Undergraduate degree	Office Personnel and Related Workers	2022-07-15	2022-07-15	2022-05-05	2023-02-09	10weeks1days	1	0	164.50			56	114	55.00	Denial of Common Medical History	No	33	16	5-6	30-35	No		No				No		No	No		Pregnancy Monitoring for Advanced Maternal Age Primiparous Women		Age≥35	39	Good	2022-07-15
532			33			Anhui Province	Non-local permanent residents	Undergraduate degree	Unclassified Workers	2022-07-15	2022-07-15	2022-05-24	2023-02-28	7weeks3days	3	1	162.00			58	118	50.50			29	15	6-	30-		History of hypothyroidism during pregnancy, with postpartum thyroid function re-examination showing no abnormalities. In January 2022, underwent bilateral cataract surgery, and in May 2018, received medication treatment for ectopic pregnancy.	No	No	No			No	No	No		High-risk pregnancy care,Hypothyroidism,Pregnancy complicated by Fungal vaginitis		Uncomplicated hypothyroidism requiring medication	45	Good	2022-07-15
533			39			Jiangsu Province	Non-local permanent residents	Postgraduate Education	Skilled Professionals	2022-07-15	2022-07-15	2022-05-08	2023-02-12	9weeks5days	1	0	160.00			60	118	52.00			32	14	5-7	28-30	No		No				No		No	No		High-risk pregnancy care,Pregnancy Monitoring for Advanced Maternal Age Primiparous Women		Age≥35	43	Good	2022-07-15
534			33			Henan Province	Non-local permanent residents	Postgraduate Education	Office Personnel and Related Workers	2022-07-15	2022-07-15	2022-05-09	2023-02-13	9weeks4days	1	0	174.00			62	102	57.00			28	14	3-5	28-	No							No	No	No		Routine prenatal care		Normal	34	Good	2022-07-15
535			32			Jiangsu Province	Shanghai	Undergraduate degree	Office Personnel and Related Workers	2022-07-15	2022-07-15	2022-05-21	2023-02-25	7weeks6days	2	0	166.00			58	99	53.00	Denial of Common Medical History	No	30	15	8-9	30-	No		No				No		No	No		Routine prenatal care		Normal	31	Good	2022-07-15
536			34				Non-local permanent residents	Undergraduate degree	Unclassified Workers	2022-07-15	2022-07-15	2022-05-16	2023-02-20	8weeks4days	2	0	160.00			60	95	60.00			32		15-30	28-	No		No				No		No	No		Routine prenatal care		Normal			2022-07-15
537			33			Shanghai	Shanghai	College Diploma	Office Personnel and Related Workers	2022-07-15	2022-07-15	2022-05-09	2023-02-13	9weeks4days	3	0	165.50			64	111	85.00			31	14	3-5	30-	No		No				No		No	No		High-risk pregnancy care,BMI>28,History of high-grade squamous intraepithelial lesion (HSIL) of the cervix		2|4|Other Situations Yellow alert classification ;Assessment Other Situations:Post-LEEP ,BMI≥28	25	Good	2022-07-15
538			34				Shanghai	Postgraduate Education	Unclassified Workers	2022-07-15	2022-07-15	2022-05-25	2023-03-01	7weeks2days	3	0	168.00			55	86	58.00	Denial of Common Medical History		28	15	5-	30-	No		No				0		No	No				Adverse obstetric history	33	Good	2022-07-15
539			33			Shanghai	Shanghai	Undergraduate degree	Commercial and Service Industry Personnel	2022-07-15	2022-07-15	2022-04-22	2023-01-27	12weeks	1	0	168.50			65	106	66.60			28	14	4-	21-	No		No				No		No	No		Routine prenatal care		Normal	35	Good	2022-07-15
540			33			Shanghai	Shanghai	Undergraduate degree	Office Personnel and Related Workers	2022-07-15	2022-07-15	2022-04-30	2023-02-04	10weeks6days	2	0	172.50			78	128	67.00	Denial of Common Medical History	Elevit	30	16	6-	28-	No		No				No		No	No		Routine prenatal care		Normal	26	Good	2022-07-15
541			29			Shanghai	Shanghai	Postgraduate Education	Office Personnel and Related Workers	2022-07-15	2022-07-15	2022-04-23	2023-01-28	11weeks6days	1	0	176.00			73	118	75.00			26	12	7-	30-40		Previously found to have abnormal glucose tolerance. Since December 2021, took metformin for 4 months, discontinued medication in March, and has not had regular follow-up for blood glucose				maternal grandmother hypertensiondiabetes		No	No	No		High-risk pregnancy care,BMI>24		BMI≥24	28	Good	2022-07-15
542			34			Shanghai	Shanghai	Undergraduate degree	Office Personnel and Related Workers	2022-07-15	2022-07-15	2022-04-27	2023-02-01	11weeks2days	1	0	180.50			69	123	78.00	Denial of Common Medical History	No	32	14	6-	26-28	No		0				0	No	No	No		Routine prenatal care		Normal	35	Good	2022-07-15
543			30			Shanghai	Shanghai	Undergraduate degree	Office Personnel and Related Workers	2022-07-15	2022-07-15	2022-05-06	2023-02-10	10weeks	1	0	160.00			67	110	56.20	Denial of Common Medical History	Progesterone capsule 、Dydrogesterone Tablets	27	13	7-	30-	No		No				No		No	No		Pregnancy with ovarian cyst		Ovarian cyst≥5cm	31	Good	2022-07-15
544			29			Shanxi Province	Non-local permanent residents	Postgraduate Education	Unclassified Workers	2022-07-15	2022-07-15	2022-04-20	2023-01-25	12weeks2days	1	0	160.00			89	145	55.00	Denial of Common Medical History		26	12	-	28-	No		No				No		No	No		Routine prenatal care		Normal	27	Good	2022-07-15
545			35			Anhui Province	Non-local permanent residents	Undergraduate degree	Public Servants	2022-07-15	2022-07-15	2022-05-09	2023-02-13	9weeks4days	2	1	159.00			53	88	48.00	Denial of Common Medical History	No,	25	10	2-3	31-	No		No				No		No	0		Routine prenatal care		Normal	32	Good	2022-07-15
546			33			Jiangsu Province	Non-local permanent residents	College Diploma	Office Personnel and Related Workers	2022-07-15	2022-07-15	2022-05-17	2023-02-21	8weeks3days	1	0	162.50			72	127	54.00			30	13	5-	30-	No		No				No		No	No		Routine prenatal care		Normal	32	Good	2022-07-15
547			38				Non-local permanent residents	Other Situations	Unclassified Workers	2022-07-15	2022-07-15	2022-05-11	2023-02-15	9weeks2days	4	1	148.00			66	112	52.00	Denial of Common Medical History	Progesterone	27	16	7-10	24-	No		No				No		No	No		High-risk pregnancy care,Pregnancy Monitoring for Advanced Maternal Age Multiparous Women,Pregnancy complicated by Connective tissue disorders		Age≥35,Immune system disorders	38	Fair	2022-07-15
548			31			Henan Province	Non-local permanent residents	Undergraduate degree	Office Personnel and Related Workers	2022-07-15	2022-07-15	2022-05-05	2023-02-09	10weeks1days	2	1	162.50			76	129	74.00			26	12	5-	27-35	No		No				No		No	No		High-risk pregnancy care,BMI>28		BMI≥28	28	Good	2022-07-15
549			35			Henan Province	Shanghai	Undergraduate degree	Office Personnel and Related Workers	2022-07-15	2022-07-15	2022-05-20	2023-02-24	8weeks	1	0	163.00			66	99	47.00			33	14	5-7	34-		No	No	No	No		No		No	No		High-risk pregnancy care		BMI＜18.5	37	Good	2022-07-15
550			35			Zhejiang Province	Shanghai	Undergraduate degree	Office Personnel and Related Workers	2022-07-15	2022-07-15	2022-05-06	2023-02-10	10weeks	1	0	164.50			51	91	54.00	Denial of Common Medical History	Scrianen Folic acid	30	14	4-5	30-32	No		No				No		No	No		Routine prenatal care		Normal	31	Good	2022-07-15
551			33			Anhui Province	Non-local permanent residents	Undergraduate degree	Skilled Professionals	2022-07-15	2022-07-15	2022-05-10	2023-02-14	9weeks3days	1	0	168.00			60	111	57.00		quetiapine fumarate	24	13	4-6	25-28	No		No				No		Alcohol	No		Pregnancy complicated byMajor Depressive Disorder		Other SituationsNeurological disorders	32	Good	2022-07-15
552			44			Shanghai	Shanghai	Undergraduate degree	Skilled Professionals	2022-07-15	2022-07-15	2022-04-24	2023-01-29	11weeks5days	3	1	168.00			84	129	68.00			26	12	7-	45-	No						No		No	No		High-risk pregnancy care,Pregnancy Monitoring for Advanced Maternal Age Multiparous Women		BMI≥24,Age≥40	43	Good	2022-07-15
553			33				Shanghai	Undergraduate degree	Office Personnel and Related Workers	2022-07-16	2022-07-16	2022-05-08	2023-02-12	9weeks6days	3	0	164.00			76	108	51.00			33	14	6-7	35-		History of partial molar pregnancy			No			No	No	No		History of partial hydatidiform mole,High-risk pregnancy care		Prior pelvic surgery,Adverse obstetric history	36	Good	2022-07-16
554			32			Shanghai	Shanghai	Undergraduate degree	Unclassified Workers	2022-07-16	2022-07-16	2022-05-11	2023-02-15	9weeks3days	1	0	163.00			66	93	61.50			27	15	7-	28-	No		No				No		No	No		Uterine leiomyoma		Normal			2022-07-16
555			36			Anhui Province	Shanghai	Postgraduate Education	Unclassified Workers	2022-07-16	2022-07-16	2022-04-21	2023-01-26	12weeks2days	3	1	153.00			68	110	49.50			26	16	6-7	30-35	No		No				No		No	No		Pregnancy Monitoring for Advanced Maternal Age Multiparous Women		Age≥35	41	Good	2022-07-16
556			32				Non-local permanent residents	Undergraduate degree	Office Personnel and Related Workers	2022-07-16	2022-07-16	2022-05-12	2023-02-16	9weeks2days	2	1	159.00			76	113	49.00			25	12	5-	35-				No	No	No			No	No		Scarred uterus 1 time CS,High-risk pregnancy care		Scarred uterus	32	Good	2022-07-16
557			37			Jiangsu Province	Non-local permanent residents	Postgraduate Education	Office Personnel and Related Workers	2022-07-16	2022-07-16	2022-05-20	2023-02-24	8weeks1days	2	1	156.50			57	101	49.00			29	13	6-7	30-	No		No	No	No			No	No	No		Pregnancy Monitoring for Advanced Maternal Age Multiparous Women		Age≥35	36	Good	2022-07-16
558			28			Shanghai	Shanghai	Undergraduate degree	Unclassified Workers	2022-07-16	2022-07-16	2022-05-13	2023-02-17	9weeks1days	1	0	158.00			63	105	57.00			26	13	5-7	28-	No		No				No		No	No		Uterine incomplete septate		Reproductive tract malformations	34	Good	2022-07-16
559			39			Shandong Province	Non-local permanent residents	Undergraduate degree	Office Personnel and Related Workers	2022-07-16	2022-07-16	2022-05-04	2023-02-08	10weeks3days	2	0	156.00			77	141	60.00			31	13	6-	45-90		Ankylosing spondylitis.		hereditary 强制性脊柱炎			No		No	No		High-risk pregnancy care,| Advanced age ,BMI≥24，Ankylosing spondylitis		Age≥35,BMI≥24,Immune system disorders	32	Good	2022-07-16
560			37			Shanghai	Shanghai	Undergraduate degree	Office Personnel and Related Workers	2022-07-16	2022-07-16	2022-05-10	2023-02-14	9weeks4days	2	0	165.00			72	114	55.00			34	12	4-	28-				No	No	No	No		No	No		High-risk pregnancy care,| Advanced age ，Post-lung cancer surgery		Age≥35	39	Good	2022-07-16
561			31			Henan Province	Shanghai	Postgraduate Education	Unclassified Workers	2022-07-16	2022-07-16	2022-05-13	2023-02-17	9weeks1days	1	0	167.00			63	106	50.00			29	12	7-	30-	No		No				No		No	No		High-risk pregnancy care		BMI＜18.5	30	Good	2022-07-16
562			25			Henan Province	Non-local permanent residents	College Diploma	Unclassified Workers	2022-07-16	2022-07-16	2022-05-07	2023-02-11	10weeks	1	0	163.50			78	110	49.50	Denial of Common Medical History	No	23	13	7-	32-	No		No	No	No		0	No	No	No		Routine prenatal care		Normal	31	Good	2022-07-16
563			31			Liaoning Province	Non-local permanent residents	Undergraduate degree	Office Personnel and Related Workers	2022-07-16	2022-07-16	2022-05-07	2023-02-11	10weeks	2	0	154.50			84	138	60.00	Denial of Common Medical History	No			5-	28-	No		No				No		No	No		High-risk pregnancy care,BMI>24		BMI≥24	28	Good	2022-07-16
564			38			Hebei Province	Non-local permanent residents	Postgraduate Education	Office Personnel and Related Workers	2022-07-16	2022-07-16	2022-05-15	2023-02-19	8weeks6days	1	0	160.00			71	123	60.00	Denial of Common Medical History	No	36	15	3-7	30-35	No		No				No		No	0		Pregnancy Monitoring for Advanced Maternal Age Primiparous Women		Age≥35	43	Good	2022-07-16
565			30			Fujian Province	Shanghai	Postgraduate Education	Office Personnel and Related Workers	2022-07-16	2022-07-16	2022-04-25	2023-01-30	11weeks5days	1	0	155.00			57	104	41.00			27	15	5-6	28-30	No		No				No		No	No		High-risk pregnancy careBMI<18.5,Pregnancy with ovarian cyst？		BMI＜18.5	28	Good	2022-07-16
566			30			Shaanxi Province	Shanghai	Postgraduate Education	Skilled Professionals	2022-07-16	2022-07-16	2022-04-29	2023-02-03	11weeks1days	1	0	160.00			71	106	50.00	Denial of Common Medical History	No	28		7-10	34-	No		No	No	No		0	No	No	No		Pregnancy with ovarian cyst Teratoma ？		Normal	29	Good	2022-07-16
567			32			320800000000	Non-local permanent residents	Undergraduate degree	Office Personnel and Related Workers	2022-07-16	2022-07-16	2022-05-24	2023-02-28	7weeks4days	1	0	168.50			68	106	55.00	Denial of Common Medical History	No	30	14	4-5	28-	No		No				No		Radiation	No		Routine prenatal care		Normal	31	Good	2022-07-16
568			34			Hubei Province	Non-local permanent residents	Vocational Secondary Education	Office Personnel and Related Workers	2022-07-16	2022-07-16	2022-05-18	2023-02-22	8weeks3days	3	0	159.50			67	112	50.50			33	14	3-4	28-	No		No	No	No			No	No	No		Routine prenatal care		Normal	36	Good	2022-07-16
569			31			Hubei Province	Shanghai	Postgraduate Education	Office Personnel and Related Workers	2022-07-16	2022-07-16	2022-05-05	2023-02-09	10weeks2days	1	0	160.50			65	110	64.00			27	14	7-	28-	No		No	No	No			No	No	No		High-risk pregnancy care,BMI>24		BMI≥24	34	Good	2022-07-16
570			36			230600000000	Non-local permanent residents	Undergraduate degree	Unclassified Workers	2022-07-16	2022-07-16	2022-06-02	2023-03-09	6weeks2days	2	0	160.50			76	127	88.00	Denial of Common Medical History	Progesterone	27	14	5-7	28-30	No		No	No	No		0		No	No		High-risk pregnancy care,BMI>24,Pregnancy Monitoring for Advanced Maternal Age Primiparous Women,Post-mucinous ovarian cyst surgery		Age≥35,Prior pelvic surgery,BMI≥28	39	Good	2022-07-16
571			32			Jiangsu Province	Non-local permanent residents	Postgraduate Education	Skilled Professionals	2022-07-16	2022-07-16	2022-05-09	2023-02-13	9weeks5days	1	0	158.00			64	105	50.00	Denial of Common Medical History	No	27	14	4-5	30-	No		No				No		No	No		Pregnancy with ovarian cyst luteinized cyst ？		Normal	34	Good	2022-07-16
572			36			Shandong Province	Shanghai	Postgraduate Education	Skilled Professionals	2022-07-16	2022-07-16	2022-05-17	2023-02-21	8weeks4days	2	0	163.00			58	91	66.00	Denial of Common Medical History	No	33	12	5-6	28-	No		No				No		No	No		Pregnancy Monitoring for Advanced Maternal Age Primiparous Women,High-risk pregnancy careBMI>24,Hashimoto's thyroiditis		Age≥35,BMI≥24,Thyroid disease that does not require medication	39	Good	2022-07-16
573			34			Hebei Province	Shanghai	Postgraduate Education	Skilled Professionals	2022-07-16	2022-07-16	2022-05-17	2023-02-21	8weeks4days	1	0	154.50			70	115	43.50			29	16	7-	30-	No		No				No		No	No		High-risk pregnancy careBMI<18.5		BMI＜18.5	34	Good	2022-07-16
574			36			Zhejiang Province	Shanghai	Undergraduate degree	Office Personnel and Related Workers	2022-07-16	2022-07-16	2022-05-18	2023-02-22	8weeks3days	1	0	166.00			77	121	52.00	Denial of Common Medical History		34	14	7-	30-	0	Premature beats	0	No	No	No	No		No	No		High-risk pregnancy care,| Advanced age		Age≥35	36	Good	2022-07-16
575			28			Anhui Province	Non-local permanent residents	Postgraduate Education	Office Personnel and Related Workers	2022-07-16	2022-07-16	2022-06-01	2023-03-08	6weeks3days	1	0	160.00			66	128	55.00	Denial of Common Medical History	Levothyroxine	27	14	6-	29-	Respiratory diseases	In 2021, underwent right thyroid lobectomy for thyroid cancer.	coagulation factor deficiency	No	No	No	Sulfonamides	No	smooking	No		Pregnancy with ovarian cyst		Ovarian cyst≥5cm,Uncomplicated hypothyroidism requiring medication	27	Good	2022-07-16
576			33			Shandong Province	Shanghai	Postgraduate Education	Office Personnel and Related Workers	2022-07-16	2022-07-16	2022-05-27	2023-03-03	7weeks1days	1	0	174.50			81	111	53.50	Denial of Common Medical History	No	27	14	-	30-	No		No				0	No	No	No		High-risk pregnancy care<18.5,Uterine Leiomyomas8mm		BMI＜18.5	34	Good	2022-07-16
577			38			Zhejiang Province	Shanghai	Undergraduate degree	Unclassified Workers	2022-07-16	2022-07-16	2022-05-02	2023-02-06	10weeks5days	2	0	180.00			84	137	68.00	Denial of Common Medical History	No	34	16	5-7	28-45	No		No				No		No	No		Pregnancy Monitoring for Advanced Maternal Age Primiparous Women		Age≥35	36	Good	2022-07-16
578			33			Jiangsu Province	Shanghai	Postgraduate Education	Skilled Professionals	2022-07-16	2022-07-16	2022-04-28	2023-02-02	11weeks2days	1	0	163.50			66	124	57.00		Folic acid	28	18	5-7	28-30	No		No				No		No	Not clear		Hepatitis B surface antigen carriers,Pregnancy with ovarian cyst^ luteinized cyst ？,High-risk pregnancy care		Hepatitis B virus surface antigen positive and liver function Normal,Ovarian cyst≥5cm	30	Good	2022-07-16
579			35			Jiangsu Province	Shanghai	Postgraduate Education	Unclassified Workers	2022-07-16	2022-07-16	2022-04-15	2023-01-20	13weeks1days	3	0	174.00			63	130	65.00	Denial of Common Medical History	No	32	13	5-	32-	No		No	No	No		0	No	No	No		Routine prenatal care		Normal	33	Good	2022-07-16
580			30			Sichuan Province	Non-local permanent residents	Undergraduate degree	Operational Staff and Associated Individuals	2022-07-16	2022-07-16	2022-05-08	2023-02-12	9weeks6days	2	1	174.50			62	88	56.00	Denial of Common Medical History	No	24	13	5-	25-	No		No				No		Alcohol	No		High-risk pregnancy care,BMI<18.5,Pregnancy with ovarian cyst luteinized cyst ？		BMI＜18.5,Ovarian cyst≥5cm	30	Good	2022-07-16
581			35			Shanghai	Non-local permanent residents	Postgraduate Education	Skilled Professionals	2022-07-16	2022-07-16	2022-05-16	2023-02-20	8weeks5days	1	0	158.00			59	109	77.00			28	14	5-6	30-40	No		No				No		No	No		Uterine Leiomyomas,High-risk pregnancy care,Pregnancy complicated byObesity,|BMI≥28;		BMI≥28	34	Good	2022-07-16
582			44			Shanghai	Shanghai	Postgraduate Education	Unclassified Workers	2022-07-16	2022-07-16	2022-04-17	2023-01-22	12weeks6days	3	1	165.00			71	115	65.00			26	16	6-	30-	No		No				No		No	No		Pregnancy Monitoring for Advanced Maternal Age Multiparous Women, mild anemia		Age≥40	49	Good	2022-07-16
583			41				Shanghai	Undergraduate degree	Office Personnel and Related Workers	2022-07-18	2022-07-18	2022-05-22	2023-02-26	8weeks1days	1	0	168.00			109	167	93.00			33	12	5-7	31-									No	No				BMI≥28,Age≥40	39	Good	2022-07-18
584			32			Zhejiang Province	Non-local permanent residents	Postgraduate Education	Unclassified Workers	2022-07-18	2022-07-18	2022-05-16	2023-02-20	9weeks	1	0	166.50			69	106	51.50			25	14	7-	28-		history of cholecystitis		No	No	No			No	No		Routine prenatal care		Normal	31	Good	2022-07-18
585			42			Jiangsu Province	Shanghai	Postgraduate Education	Skilled Professionals	2022-07-18	2022-07-18	2022-04-28	2023-02-02	11weeks4days	2	0	175.00			70	110	55.00			40	17	10-15	26-		Had one induction of labor in 2020		No	No	No		No	No	No				Adverse obstetric history,BMI＜18.5,Age≥40	37	Good	2022-07-18
586			28			Jiangsu Province	Non-local permanent residents	Undergraduate degree	Unclassified Workers	2022-07-18	2022-07-18	2022-05-14	2023-02-18	9weeks2days	2	1	166.00			60	105	49.00	Denial of Common Medical History	No	24	14	7-	30-	No		No				No		No	No		High-risk pregnancy careBMI＜18.5		BMI＜18.5	27	Good	2022-07-18
587			41				Shanghai	Other Situations	Office Personnel and Related Workers	2022-07-18	2022-07-18	2022-05-20	2023-02-24	8weeks3days			168.00			68	99	61.50			38	15	6-7	35-	No		No				No		No	No				Age≥40			2022-07-18
588			36			Shanghai	Shanghai	Postgraduate Education	Office Personnel and Related Workers	2022-07-18	2022-07-18	2022-05-25	2023-03-01	7weeks5days	2	1	163.00			86	137	63.00			26	14	5-7	30-	No						No		No	No				Age≥35	35	Good	2022-07-18
589			35			Guangxi Zhuang Autonomous Region	Non-local Migrant Population	Undergraduate degree	Office Personnel and Related Workers	2022-07-18	2022-07-18	2022-05-10	2023-02-14	9weeks6days	1	0	154.00			61	100	40.00	Denial of Common Medical History	ZiShenYuTaiWan	31	14	5-	28-30	No		No	No	No		0	No	No	No		High-risk pregnancy careBMI＜18.5		BMI＜18.5	31	Good	2022-07-18
590			27			230100000000	Non-local permanent residents	Undergraduate degree	Commercial and Service Industry Personnel	2022-07-18	2022-07-18	2022-05-25	2023-03-01	7weeks5days	2	0	162.00			68	106	52.00			25	15	5-7	35-	No			No	No	No		No	No	No				Normal	28	Good	2022-07-18
591			38			Jiangsu Province	Shanghai	Postgraduate Education	Office Personnel and Related Workers	2022-07-18	2022-07-18	2022-05-17	2023-02-21	8weeks6days	3	2	169.00			53	103	53.00			26	14	7-	30-	No		No				No		No	No		Pregnancy Monitoring for Advanced Maternal Age Multiparous Women		Age≥35	38	Good	2022-07-18
592			38			361100000000	Non-local permanent residents	Undergraduate degree	Unclassified Workers	2022-07-18	2022-07-18	2022-05-24	2023-02-28	7weeks6days	3	1	160.00			64	108	56.00			35	14	4-	26-	No		No				No		No	No				Age≥35,Prior pelvic surgery	35	Good	2022-07-18
593			40			Heilongjiang Province	Shanghai	Postgraduate Education	Office Personnel and Related Workers	2022-07-18	2022-07-18	2022-05-21	2023-02-25	8weeks2days	4	2	160.00			64	110	60.00			25	13	7-	30-	No		No				No		No	No		Pregnancy Monitoring for Advanced Maternal Age Multiparous Women,Pregnancy surveillance in women with a history of neonatal death		Age≥35,2|4|Other Situations Yellow alert classification ;Assessment Other Situations:History of Neonatal Death	39	Good	2022-07-18
594			45			Shanghai	Shanghai	Senior Secondary Education	Unclassified Workers	2022-07-18	2022-07-18	2022-05-07	2023-02-11	10weeks2days	2	0	164.50			69	126	75.00			43	13	4-6	30-	No		No				No		No	No		Multiple Uterine Leiomyomaspossible，largest one 24*26*19mm,Pregnancy Monitoring for Advanced Maternal Age Primiparous Women,High-risk pregnancy careBMI≥24， smoking 20+ years，Cigarette smoking 1 month		BMI≥24,Age≥40	40	Good	2022-07-18
595			33			Henan Province	Non-local permanent residents	Undergraduate degree	Office Personnel and Related Workers	2022-07-18	2022-07-18	2022-05-15	2023-02-19	9weeks1days	2	0	167.50			70	116	51.00			29	13	6-	30-	No		No	No	No		No		No	No		High-risk pregnancy care BMI＜18.5		BMI＜18.5	29	Good	2022-07-18
596			29			Jiangsu Province	Shanghai	Postgraduate Education	Unclassified Workers	2022-07-18	2022-07-18	2022-04-27	2023-02-01	11weeks5days	1	0	161.50			67	106	57.50			26	12	7-8	28-	No						No		No	No		Routine prenatal care		Normal	34	Good	2022-07-18
597			40			310100000000	Shanghai	Undergraduate degree	Office Personnel and Related Workers	2022-07-18	2022-07-18	2022-04-22	2023-01-27	12weeks3days	1	0	160.00			80	128	71.00		Elevit		13	4-	30-		Has had Wolff-Parkinson-White syndrome since childhood, reports no discomfort							No	No		Pregnancy Monitoring for Advanced Maternal Age Primiparous Women,High-risk pregnancy care BMI≥24		Age≥35,BMI≥24	43	Good	2022-07-18
598			29			Anhui Province	Non-local Migrant Population	College Diploma	Office Personnel and Related Workers	2022-07-18	2022-07-18	2022-05-07	2023-02-11	10weeks2days	1	0	165.00			76	122	53.00			26	13	7-	28-	No			No	No	No		No	No	No				Normal	29	Good	2022-07-18
599			26			Liaoning Province	Non-local permanent residents	College Diploma	Office Personnel and Related Workers	2022-07-18	2022-07-18	2022-05-01	2023-02-05	11weeks1days	3	0	166.50			75	119	80.00			22	15	5-	30-		Right ovarian cyst for 1 year, 2 cm before pregnancy; incomplete uterine septum for 1 year, untreated. On June 14, 2022, Rh(D) blood type: negative. TSH: 5.38 uIU/ml.					No		No	No		High-risk pregnancy careBMI≥28，Rh Dnegative ,right Ovarian cyst35*27*23mm		2|4|Other Situations Yellow alert classification ;Assessment Other Situations:RHnegative Blood Type ,BMI≥28	28	Good	2022-07-18
600			36			Shanghai	Shanghai	Undergraduate degree	Skilled Professionals	2022-07-19	2022-07-19	2022-05-05	2023-02-09	10weeks5days	4	2	168.00			80	120	63.00			30	14	6-	28-	No		No				No		No	No		High-risk pregnancy care,Pregnancy Monitoring for Advanced Maternal Age Multiparous Women		Age≥35	40	Good	2022-07-19
601			40			Shaanxi Province	Shanghai	College Diploma	Office Personnel and Related Workers	2022-07-19	2022-07-19	2022-05-03	2023-02-07	11weeks	2	1	164.00			67	119	52.00			33	14	4-	28-	No						No		No	No		Pregnancy Monitoring for Advanced Maternal Age Multiparous Women,Pregnancy surveillance in a woman with a history of neonatal hemolytic disease due to ABO incompatibility in a previous pregnancy		Age≥35,2|4|Other Situations Yellow alert classification ;Assessment Other Situations:Previous pregnancy ABO hemolytic disease of the newborn.	35	Good	2022-07-19
602			39			Anhui Province	Non-local permanent residents	Junior Secondary Education	Unclassified Workers	2022-07-19	2022-07-19	2022-05-13	2023-02-17	9weeks4days	2	1	157.50			79	113	60.00			23	13	7-	30-60	No		No				No		No	No		High-risk pregnancy care, BMI≥24,PCOS 1 years ,Scarred uterus 1 times,Pregnancy Monitoring for Advanced Maternal Age Multiparous Women		Age≥35,BMI≥24,Scarred uterus	38	Fair	2022-07-19
603			38			Guangdong Province	Non-local permanent residents	Junior Secondary Education	Office Personnel and Related Workers	2022-07-19	2022-07-19	2022-05-14	2023-02-18	9weeks3days	5	3	159.50			63	107	52.00			29	13	7-	30-	No		No	No	No			No	No	No		Pregnancy Monitoring for Advanced Maternal Age Multiparous Women, Birth 3 times		Age≥35,2|4|Other Situations Yellow alert classification ;Assessment Other Situations:D3	37	Good	2022-07-19
604			31			Shanghai	Shanghai	Undergraduate degree	Unclassified Workers	2022-07-19	2022-07-19	2022-04-25	2023-01-30	12weeks1days	2	0	152.00			67	105	50.00	Denial of Common Medical History	Yes	26	13	5-	28-	No		No				No		No	No		Routine prenatal care		Normal	31	Good	2022-07-19
605			32			211000000000	Shanghai	Postgraduate Education	Office Personnel and Related Workers	2022-07-19	2022-07-19	2022-05-25	2023-03-01	7weeks6days	1	0	169.00			61	118	65.00			26	13	5-	28-	No					father Coronary heart disease (CHD)	No		No	No		left Ovarian cyst37*35*33mm,Routine prenatal care		Normal	31	Good	2022-07-19
606			35			Guangxi Zhuang Autonomous Region	Non-local permanent residents	Undergraduate degree	Office Personnel and Related Workers	2022-07-19	2022-07-19	2022-05-07	2023-02-11	10weeks3days	2	1	158.00			57	100	62.00	Denial of Common Medical History	No	30	13	5-	28-	No		No				No		No	No		High-risk pregnancy care		BMI≥24	32	Good	2022-07-19
607			30			Shanghai	Shanghai	Undergraduate degree	Office Personnel and Related Workers	2022-07-19	2022-07-19	2022-05-13	2023-02-17	9weeks4days	1	0	162.00			55	99	48.00			26	15	4-	28-	No		No				No		No	No		High-risk pregnancy careBMI＜18.5		BMI＜18.5	30	Good	2022-07-19
608			32			379900000000	Non-local permanent residents	Undergraduate degree	Unclassified Workers	2022-07-19	2022-07-19	2022-05-10	2023-02-14	10weeks	4	0	164.00			60	110	67.00			30	14	6-	30-	No		No				No		No	No		High-risk pregnancy careBMI≥24,Pregnancy with a history of multiple induced abortions Two induced abortions and one dilation and curettage (D&C) for a missed abortion ,Pregnancy supervision with a history of embryonic arrest1		BMI≥24, Various types of miscarriage ≥3 times	26	Good	2022-07-19
609			33			Jiangsu Province	Non-local permanent residents	Undergraduate degree	Office Personnel and Related Workers	2022-07-19	2022-07-19	2022-04-29	2023-02-03	11weeks4days			170.00			64	102	51.00			31	16	6-	30-	No						No		No	No		High-risk pregnancy care		BMI＜18.5	31	Good	2022-07-19
610			31				Shanghai	Postgraduate Education	Skilled Professionals	2022-07-19	2022-07-19	2022-05-24	2023-02-28	8weeks			165.00			64	105	62.00			27	14	5-6	32-	No						No		No	No		Routine prenatal care		Normal	33	Good	2022-07-19
611			29			Shanghai	Shanghai	Undergraduate degree	Unclassified Workers	2022-07-19	2022-07-19	2022-05-03	2023-02-07	11weeks	1	0	162.50			62	90	62.00	Denial of Common Medical History	Dydrogesterone Tablets，Vitamin D，Folic acid，Metformin Hydrochloride Sustained Release Tablets ，Levothyroxine	25	10	10-	40-	0	Subclinical hypothyroidism for 2 years, taking Euthyrox 1 tablet once daily to date; insulin resistance for 6 months, taking metformin 2 tablets twice daily to date	0	No	No	No	No		No	No		Insulin Resistance Half a year, Subclinical hypothyroidism 2 years,High-risk pregnancy care		Uncomplicated hypothyroidism requiring medication	31	Fair	2022-07-19
612			40			310100000000	Shanghai	Undergraduate degree	Unclassified Workers	2022-07-19	2022-07-19	2022-05-25	2023-03-01	7weeks6days	3	1	160.00			72	121	65.00			30	14	5-6	25-	No						No		No	No		High-risk pregnancy care,Pregnancy Monitoring for Advanced Maternal Age Multiparous Women,Scarred uterus		Age≥35,BMI≥24,Scarred uterus	39	Good	2022-07-19
613			34			419900000000	Shanghai	Postgraduate Education	Unclassified Workers	2022-07-19	2022-07-19	2022-05-03	2023-02-07	11weeks			170.00			68	122	57.00			31	13	7-	30-	No		No				No		No	No		Routine prenatal care		Normal	35	Good	2022-07-19
614			37			Shanghai	Shanghai	Undergraduate degree	Unclassified Workers	2022-07-19	2022-07-19	2022-06-01	2023-03-08	6weeks6days	1	0	166.50			58	99	65.00			26	14	3-4	28-		History of coccyx fracture					No		No	No		Routine prenatal care		Normal	40	Good	2022-07-19
615			40			Shanghai	Shanghai	Postgraduate Education	Unclassified Workers	2022-07-19	2022-07-19	2022-05-01	2023-02-05	11weeks2days	3	1	171.00			95	151	90.00	Denial of Common Medical History	No	27	16	4-5	28-	No		0				No		No	No		High-risk pregnancy care,Obesity,Pregnancy Monitoring for Advanced Maternal Age Multiparous Women		Age≥35,BMI≥28	41	Good	2022-07-19
616			34			Zhejiang Province	Shanghai	Undergraduate degree	Office Personnel and Related Workers	2022-07-19	2022-07-19	2022-05-19	2023-02-23	8weeks5days			156.00			64	106	61.00	Denial of Common Medical History	Folic acid	31	14	5-	26-	0	Chronic hives (urticaria) allergy history, allergens include dust mites and pollen	0				No		No	No		High-risk pregnancy care		BMI≥24	35	Good	2022-07-19
617			36			Hunan Province	Non-local permanent residents	College Diploma	Office Personnel and Related Workers	2022-07-19	2022-07-19	2022-05-15	2023-02-19	9weeks2days	2	0	165.50			69	114	61.00			30	30	4-5	28-30	No			No	No	No	No		No	No		Uterine Leiomyomas 42*40*37mm,Pregnancy Monitoring for Advanced Maternal Age Primiparous Women, Congenital uterine malformation, incomplete uterine septum		Age≥35, Reproductive tract malformations	48	Good	2022-07-19
618			29			Jiangxi Province	Shanghai	Postgraduate Education	Skilled Professionals	2022-07-19	2022-07-19	2022-05-06	2023-02-10	10weeks4days			153.00			73	106	47.00			26	14	7-	30-	No		No				No		No	No		Routine prenatal care		Normal	30	Good	2022-07-19
619			36			Hunan Province	Non-local permanent residents	Undergraduate degree	Office Personnel and Related Workers	2022-07-19	2022-07-19	2022-05-10	2023-02-14	10weeks	2	0	150.50			66	112	46.00			29	11	5-6	26-28	No		No				No		No	No		Pregnancy Monitoring for Advanced Maternal Age Primiparous Women,HPV infection53,58+Pregnancy supervision with a history of embryonic arrest15号 chromosomal abnormalities		Age≥35,Other SituationsAdverse obstetric history,2|4|Other Situations Yellow alert classification ;Assessment Other Situations:HPVInfection	36	Good	2022-07-19
620			34			Shandong Province	Shanghai	Postgraduate Education	Public Servants	2022-07-20	2022-07-20	2022-04-21	2023-01-26	12weeks6days	2	1	161.50			55	86	51.00			28	14	5-7	30-	No		No				No		No	No		Routine prenatal care		Normal	37	Good	2022-07-20
621			40			Shanxi Province	Shanghai	Postgraduate Education	Skilled Professionals	2022-07-20	2022-07-20	2022-05-08	2023-02-12	10weeks3days	3	1	166.50			64	115	60.00			10	12	3-5	24-26	No		No				No		No	No		Pregnancy Monitoring for Advanced Maternal Age Multiparous Women,Pregnancy complicated by cervical polyps		Age≥35	38	Good	2022-07-20
622			32			Jiangsu Province	Non-local permanent residents	Undergraduate degree	Office Personnel and Related Workers	2022-07-20	2022-07-20	2022-05-11	2023-02-15	10weeks	3	0	155.00			60	107	55.00			28	13	4-6	28-	No			No	No	No	No		No	No		High-risk pregnancy care		Normal	29	Good	2022-07-20
623			33			320900000000	Shanghai	Postgraduate Education	Unclassified Workers	2022-07-20	2022-07-20	2022-05-17	2023-02-21	9weeks1days	1	0	164.00			67	128	90.00			27	13	7-	30-	No						No		No	No				BMI≥28	33	Good	2022-07-20
624			35			Jiangsu Province	Non-local permanent residents	College Diploma	Unclassified Workers	2022-07-20	2022-07-20	2022-05-09	2023-02-13	10weeks2days	1	0	160.00			62	100	49.00			32	15	4-6	30-	No		No					No	No	No		Routine prenatal care		Normal	30	Good	2022-07-20
625			32			Hunan Province	Non-local Migrant Population	Vocational Secondary Education	Unclassified Workers	2022-07-20	2022-07-20	2022-05-20	2023-02-24	8weeks5days	4	0	150.00			72	132	53.00	Denial of Common Medical History	Antiabortifacient	22	14	7-	30-	0		No				No		No	No				Adverse obstetric history	37	Good	2022-07-20
626			39			Zhejiang Province	Shanghai	Undergraduate degree	Office Personnel and Related Workers	2022-07-20	2022-07-20	2022-04-15	2023-01-20	13weeks5days	3	1	165.00			70	119	83.00			25	14	5-	30-90		Has had thyroiditis for 8 years, with regular follow-up of thyroid function, no medication taken; experienced an acute gout attack 3 years ago, treated with colchicine and febuxostat for control, followed by regular follow-up.							No	No		Pregnancy Monitoring for Advanced Maternal Age Multiparous Women,Scarred uterus 1 time CS,High-risk pregnancy careBMI>28		Age≥35,Scarred uterus,BMI≥28	40	Good	2022-07-20
627			30			Shanghai	Shanghai	Undergraduate degree	Office Personnel and Related Workers	2022-07-20	2022-07-20	2022-05-21	2023-02-25	8weeks4days	1	0	159.00			54	100	49.00	Denial of Common Medical History	Dydrogesterone Tablets	27	12	4-	35-	No		No				No		No	No		Routine prenatal care, History of asthma		Normal	32	Good	2022-07-20
628			35			Anhui Province	Non-local permanent residents	College Diploma	Unclassified Workers	2022-07-20	2022-07-20	2022-05-13	2023-02-17	9weeks5days	1	0	156.50			58	99	73.00	Denial of Common Medical History	No	33	13	3-5	28-	0	On June 25, 2022, an ultrasound examination at an outside hospital revealed a right ovarian cyst	0	No	No	Mother post-operative for breast cancer.	No		No	No		High-risk pregnancy care History of pelvic surgery，BMI＞28		Prior pelvic surgery,BMI≥28	31	Good	2022-07-20
629			31			Shanxi Province	Non-local permanent residents	Undergraduate degree	Office Personnel and Related Workers	2022-07-20	2022-07-20	2022-05-16	2023-02-20	9weeks2days	1	0	154.50			70	101	59.00	Denial of Common Medical History	Euthyrox Elevit	29	13	6-	29-	0	At 35 days of pregnancy, came to the hospital for examination and found hypothyroidism, currently on medication	0	Hypertension	No	No	No		No	No fever		High-risk pregnancy care, Pregnancy subclinical Hypothyroidism ；BMI＞24		BMI≥24, Hypothyroidism with complications requiring medication	31	Good	2022-07-20
630			30			Jiangsu Province	Non-local permanent residents	Undergraduate degree	Office Personnel and Related Workers	2022-07-20	2022-07-20	2022-05-06	2023-02-10	10weeks5days	1	0	163.00			55	96	47.50			29	12	7-	28-	No		No				No		No	No				BMI＜18.5	28	Good	2022-07-20
631			31			Sichuan Province	Shanghai	Postgraduate Education	Office Personnel and Related Workers	2022-07-20	2022-07-20	2022-05-10	2023-02-14	10weeks1days	1	0	158.00			56	88	52.00	Denial of Common Medical History	No	27	12	5-7	28-	0	No	0	No	No	No	0	No	No	No				Normal	32	Good	2022-07-20
632			31			Gansu Province	Shanghai	Undergraduate degree	Skilled Professionals	2022-07-20	2022-07-20	2022-04-29	2023-02-03	11weeks5days	1	0	160.00			86	120	47.50			28	14	4-6	28-	No		No				No		No	No		IVF pregnancy status,High-risk pregnancy care History of pelvic cyst puncture		Assisted reproductive pregnancy,Prior pelvic surgery	45	Good	2022-07-20
633			33			Shanghai	Shanghai	Postgraduate Education	Office Personnel and Related Workers	2022-07-20	2022-07-20	2022-05-15	2023-02-19	9weeks3days	1	0	166.50			57	111	55.00			26	14	5-6	28-		Uterine fibroids were discovered 1 month ago; an ultrasound on July 20 showed a medium to high echogenicity mass on the left uterine wall measuring 27 x 25 x 24 mm.		No	No	No	No		No	No		Pregnancy complicated by Uterine Leiomyomas Left uterine wall with a high echo measuring 27*25*24 mm.		Prior pelvic surgery	36	Good	2022-07-20
634			30			Jiangsu Province	Shanghai	Postgraduate Education	Skilled Professionals	2022-07-20	2022-07-20	2022-05-07	2023-02-11	10weeks4days	2	0									27	12	7-	35-		No		No	No			No	No	No				BMI≥24	29	Good	2022-07-20
635			36			239900000000	Shanghai	Undergraduate degree	Office Personnel and Related Workers	2022-07-20	2022-07-20	2022-05-11	2023-02-15	10weeks	1	0	171.00			81	139	62.00	Denial of Common Medical History	Dydrogesterone Tablets	30	11	5-	28-	No		No	No	No		0	No	No	No		Routine prenatal care		Normal	35	Good	2022-07-20
636			25				Non-local permanent residents	Other Situations	Unclassified Workers	2022-07-21	2022-07-21	2022-05-17	2023-02-21	9weeks2days	2	1	176.00			88	131	75.00			23	13	5-7	28-	No		No				No		No	No				BMI≥24	23	Good	2022-07-21
637			33			Shandong Province	Shanghai	Postgraduate Education	Skilled Professionals	2022-07-21	2022-07-21	2022-05-13	2023-02-17	9weeks6days	1	0	168.50			78	126	60.00			28	13	4-6	28-	No		No				No		No	No		Routine prenatal care		Normal	30	Good	2022-07-21
638			32			Jiangsu Province	Shanghai	Undergraduate degree	Office Personnel and Related Workers	2022-07-21	2022-07-21	2022-05-13	2023-02-17	9weeks6days	1	0	159.00			79	136	59.50			26	12	5-7	28-30		No		No	No	No		No	No	No				Normal	31	Good	2022-07-21
639			38			Jiangsu Province	Shanghai	Postgraduate Education	Office Personnel and Related Workers	2022-07-21	2022-07-21	2022-05-04	2023-02-08	11weeks1days	1	0	160.00			84	131	59.00	Denial of Common Medical History	Dydrogesterone Tablets，Chinese herbal supplement for pregnancy support,	29	10	7-	28-30	No		0	No	No	grandmother diabetes	No		No	No		Uterine Leiomyomas25*24*21mm,Pregnancy Monitoring for Advanced Maternal Age Primiparous Women		Age≥35	43	Fair	2022-07-21
640			33				Non-local permanent residents	Other Situations	Unclassified Workers	2022-07-21	2022-07-21	2022-05-04	2023-02-08	11weeks1days	1	0	160.00			63	94	51.50			28	12	7-	28-	No						No		No	No				Normal			2022-07-21
641			34			Jiangxi Province	Non-local permanent residents	Undergraduate degree	Office Personnel and Related Workers	2022-07-21	2022-07-21	2022-05-01	2023-02-05	11weeks4days	5	1	155.50			70	111	50.00			26	18	4-6	28-	No		No				No		No	No		High-risk pregnancy care,Pregnancy supervision with a history of embryonic arrest ,Scarred uterus 1 time, CS Cesarean section for fetal extraction.,Monitoring of pregnancy with a history of fetal malformation		Scarred uterus, Various types of miscarriage ≥3 ,2|1.7.7|Other SituationsAdverse obstetric history;Assessment Other Situations:History of induced labor due to fetal chromosomal abnormalities in the past, History of various uterine surgeries （ C-S、 Cornual Pregnancy 、 Uterine Leiomyomas myomectomy）≥2	30	Good	2022-07-21
642			32				Non-local permanent residents	Other Situations		2022-07-21	2022-07-21	2022-06-03	2023-03-10	6weeks6days			160.00			78	136	65.00	Denial of Common Medical History	No	29	12	7-	30-	No		Family history of hypertension Serious genetic diseases （Genetic hyperlipidemia）0/Other Situations0mmHg				No		Radiation	No		High-risk pregnancy care		BMI≥24			2022-07-21
643			40			Anhui Province	Non-local permanent residents	Undergraduate degree	Unclassified Workers	2022-07-21	2022-07-21	2022-05-29	2023-03-05	7weeks4days	3	1	161.00			66	112	60.00	Denial of Common Medical History		22	14	5-	28-	No		0				No		No	No					44	Good	2022-07-21
644			32			Hubei Province	Non-local permanent residents	Undergraduate degree	Skilled Professionals	2022-07-21	2022-07-21	2022-05-06	2023-02-10	10weeks6days	1	0	156.50			58	98	52.00			30	15	4-	30-35	No		No				No		No	No		Routine prenatal care, Cervical polyps2cm		Normal	29	Good	2022-07-21
645			33			Liaoning Province	Shanghai	Postgraduate Education	Skilled Professionals	2022-07-21	2022-07-21	2022-05-02	2023-02-06	11weeks3days	2	0	169.00			70	108	65.00			30	13	5-	30-	No		No				No		No	No		Routine prenatal care		Normal	32	Good	2022-07-21
646			32			Jiangsu Province	Shanghai	Postgraduate Education	Skilled Professionals	2022-07-21	2022-07-21	2022-05-07	2023-02-11	10weeks5days	1	0	158.00			77	120	48.00	Denial of Common Medical History	Progesterone capsule ，Yun Kang Oral Liquid，Dydrogesterone Tablets，ZiShenYuTaiWan	28	13	3-5	28-	No		No				No		No	No		Routine prenatal care		Normal	30	Good	2022-07-21
647			31			Shanghai	Shanghai	Undergraduate degree	Operational Staff and Associated Individuals	2022-07-21	2022-07-21	2022-05-26	2023-03-02	8weeks	1	0	157.00			75	129	72.00			29	14	4-6	30-	No		No				No		No	No		High-risk pregnancy care, BMI≥28, Subclinical Hypothyroidism 1 month		Uncomplicated hypothyroidism requiring medication,BMI≥28	32	Good	2022-07-21
648			38			Shanghai	Shanghai	Undergraduate degree	Office Personnel and Related Workers	2022-07-21	2022-07-21	2022-04-25	2023-01-30	12weeks3days			161.00			85	142	70.00	Denial of Common Medical History		36	14	3-4	28-30	No		No				No		No	No		Pregnancy Monitoring for Advanced Maternal Age Primiparous Women, Uterine surgery scar maternal medical treatment		Age≥35,BMI≥24	36	Good	2022-07-21
649			30			Jiangsu Province	Non-local permanent residents	College Diploma	Office Personnel and Related Workers	2022-07-21	2022-07-21	2022-05-10	2023-02-14	10weeks2days	1	0	168.00			70	125	52.00	Denial of Common Medical History		27	14	5-6	28-30	No		No				No		No	No		Pregnancy complicated by frequent Premature ventricular contractions,Pregnancy with ovarian cystleft ovary 29*23*27mm,High-risk pregnancy careBMI＜18.5		BMI＜18.5	31	Good	2022-07-21
650			29			Sichuan Province	Non-local permanent residents	College Diploma	Office Personnel and Related Workers	2022-07-21	2022-07-21	2022-05-17	2023-02-21	9weeks2days	2	0	155.00			72	119	70.00			26	13	5-	28-30				No	No	No		No	No	No		bradycardia,Pregnancy complicated byObesity		BMI≥28	26	Good	2022-07-21
651			34			Anhui Province	Non-local permanent residents	College Diploma	Office Personnel and Related Workers	2022-07-21	2022-07-21	2022-05-08	2023-02-12	10weeks4days	5	1	159.00			63	99	58.00			24	15	5-	30-	No		No				No		No	No		Pregnancy surveillance with a history of surgically treated ectopic pregnancy, pulmonary tuberculosis, and a status post left salpingo-oophorectomy.		Prior pelvic surgery,2|4|Other Situations Yellow alert classification ;Assessment Other Situations:既往肺History of tuberculosis (TB).	38	Good	2022-07-21
652			35			Shanghai	Shanghai	Postgraduate Education	Office Personnel and Related Workers	2022-07-21	2022-07-21	2022-05-16	2023-02-20	9weeks3days	2	1	172.00			65	114	65.00	Denial of Common Medical History	No	28	12	6-	32-	No		No				No		No	No		Routine prenatal care		Normal	34	Good	2022-07-21
653			32			Anhui Province	Non-local permanent residents	Senior Secondary Education	Commercial and Service Industry Personnel	2022-07-21	2022-07-21	2022-04-25	2023-01-30	12weeks3days	4	1	160.50			67	119	55.00			25	12	7-	30-	No		No				No		No	No		Pregnancy monitoring in a patient with a history of fetal malformation (induced abortion at 6 months' gestation due to fetal cardiac malformation), cesarean section scar, and positive hepatitis B surface antigen, anti-HBe, and anti-HBc.		Adverse obstetric history,Scarred uterus,Hepatitis B virus surface antigen positive and liver function Normal	33	Good	2022-07-21
654			33			Jilin Province	Non-local permanent residents	Undergraduate degree	Office Personnel and Related Workers	2022-07-21	2022-07-21	2022-04-23	2023-01-28	12weeks5days	1	0	162.50			73	112	48.00			30	12	7-	30-	No		No				No		No	No		High-risk pregnancy careBMI＜18.5，Chest tightness to be investigated, scarred uterus from myomectomy surgery.		BMI＜18.5,Prior pelvic surgery	33	Good	2022-07-21
655			31			Jiangsu Province	Shanghai	Postgraduate Education	Office Personnel and Related Workers	2022-07-22	2022-07-22	2022-05-28	2023-03-04	7weeks6days	2	0	173.00			55	105	60.00	Denial of Common Medical History	No	27	13	5-	32-	No		No	No	No		0	No	No	No		High-risk pregnancy careHistory of partial hydatidiform mole		Adverse obstetric history	29	Good	2022-07-22
656			31			Shanghai	Shanghai	Undergraduate degree	Office Personnel and Related Workers	2022-07-22	2022-07-22	2022-05-04	2023-02-08	11weeks2days	1	0	152.50			89	143	49.00	Denial of Common Medical History	No	27	14	10-15	30-	No		No				No		No	No		Routine prenatal care		Normal	33	Good	2022-07-22
657			35			Shandong Province	Shanghai	Postgraduate Education	Unclassified Workers	2022-07-22	2022-07-22	2022-05-19	2023-02-23	9weeks1days	2	0	171.00			56	90	56.00	Denial of Common Medical History	Folic acid	31	13	5-	30-		Hepatitis B 'small three positives' carrier for over 20 years, with regular follow-up of liver function and viral load		No	No	No		No	No	No		Hepatitis B surface antigen carriers,High-risk pregnancy care		Hepatitis B virus surface antigen positive and liver function Normal,Prior pelvic surgery	32	Fair	2022-07-22
658			39			Shaanxi Province	Non-local permanent residents	Undergraduate degree	Skilled Professionals	2022-07-22	2022-07-22	2022-04-26	2023-01-31	12weeks3days	5	1	158.00			51	104	50.00			28	13	6-	28-	No		No				No		No	No		Pregnancy Monitoring for Advanced Maternal Age Multiparous Women,History of multiple miscarriages Spontaneous abortion 、 Missed abortion 、One instance of fetal .,High-risk pregnancy care Blocking antibodies （+）,Hepatitis B surface antigen carriers		Age≥35, Various types of miscarriage ≥3 ,Adverse obstetric history,Hepatitis B virus surface antigen positive and liver function Normal	40	Good	2022-07-22
659			31			Shanghai	Shanghai	Undergraduate degree	Office Personnel and Related Workers	2022-07-22	2022-07-22	2022-05-01	2023-02-05	11weeks5days	2	0	176.00			74	119	70.00	Denial of Common Medical History	No	26	12	6-	30-	0	Antinuclear antibodies (positive) were found in March 2022	0	No	No		0	No	No	No		High-risk pregnancy careAntinuclear antibody positive,Monitoring of pregnancy with a history of fetal malformation Previous pregnancy miscarriage analysis indicated embryo 16-trisomy.		Adverse obstetric history,2|4|Other Situations Yellow alert classification ;Assessment Other Situations: Antinuclear Antibodies (ANAs) +	33	Good	2022-07-22
660			34			Shandong Province	Shanghai	Postgraduate Education	Office Personnel and Related Workers	2022-07-22	2022-07-22	2022-06-01	2023-03-08	7weeks2days	2	0	165.00			82	127	56.00	Denial of Common Medical History	No	32	13	6-	28-	0	No	0	No	No	No	No		No	No		High-risk pregnancy care, Unicornuate uterus , Congenital rudimentary uterine horn		Reproductive tract malformations	32	Good	2022-07-22
661			32			Anhui Province	Non-local permanent residents	Undergraduate degree	Unclassified Workers	2022-07-22	2022-07-22	2022-05-20	2023-02-24	9weeks	2	0	168.00			73	129	50.00	Denial of Common Medical History	Progesterone	26	14	7-	30-	No		No				Alcohol	No	Other Situations	No		High-risk pregnancy careBMI<18.5		BMI＜18.5	31	Good	2022-07-22
662			28			Anhui Province	Non-local permanent residents	Other Situations	Office Personnel and Related Workers	2022-07-22	2022-07-22	2022-05-19	2023-02-23	9weeks1days			158.00			66	99	53.00			26	13	7-	28-	No		No				No		No	No		Routine prenatal care		Normal	32	Good	2022-07-22
663			33			Jiangsu Province	Shanghai	Postgraduate Education	Skilled Professionals	2022-07-22	2022-07-22	2022-04-30	2023-02-04	11weeks6days	1	0	173.50			59	98	67.00			29	14	5-	38-	No		No				No		No	No		Routine prenatal care		Normal	31	Good	2022-07-22
664			31			Sichuan Province	Non-local permanent residents	Undergraduate degree	Office Personnel and Related Workers	2022-07-22	2022-07-22	2022-05-03	2023-02-07	11weeks3days			161.00			58	86	49.00	Denial of Common Medical History	No	25	14	5-	25-	0		No				No		No	No		Pregnancy complicated by thyroiditis,Hyperthyroidism		Hyperthyroidism requiring medication.	36	Fair	2022-07-22
665			37			Henan Province	Non-local permanent residents	Undergraduate degree	Office Personnel and Related Workers	2022-07-22	2022-07-22	2022-04-30	2023-02-04	11weeks6days	2	1	167.00			70	112	60.00			25	12	10-15	29-	No		No				No		No	No		Scarred uterus 1 time CS,Pregnancy Monitoring for Advanced Maternal Age Multiparous Women		Age≥35,Scarred uterus	42	Good	2022-07-22
666			32			Anhui Province	Non-local permanent residents	Undergraduate degree	Office Personnel and Related Workers	2022-07-22	2022-07-22	2022-05-03	2023-02-07	11weeks3days	1	0	172.50			73	109	50.00			30	12	3-4	28-	No		No				No		No	No		High-risk pregnancy care BMI<24,Pregnancy complicated by cervical polyps		BMI＜18.5	30	Good	2022-07-22
667			37			Jiangsu Province	Shanghai	Postgraduate Education	Office Personnel and Related Workers	2022-07-22	2022-07-22	2022-05-26	2023-03-02	8weeks1days	2	1	163.00			71	103	50.00			28	17	4-5	40-	No						No		No	No		High-risk pregnancy care,Pregnancy Monitoring for Advanced Maternal Age Multiparous Women,Hypothyroidism		Age≥35,Uncomplicated hypothyroidism requiring medication	38	Good	2022-07-22
668			38			Jiangsu Province	Non-local permanent residents	Senior Secondary Education	Office Personnel and Related Workers	2022-07-22	2022-07-22	2022-04-19	2023-01-24	13weeks3days	4	1	158.50			76	123	48.00			23	12	7-	28-30	No			No	No			No	No	No		Pregnancy Monitoring for Advanced Maternal Age Multiparous Women,Scarred uterus 1 time CS		Age≥35,Scarred uterus	39	Good	2022-07-22
669			30			Jilin Province	Shanghai	Postgraduate Education	Office Personnel and Related Workers	2022-07-22	2022-07-22	2022-05-20	2023-02-24	9weeks	1	0	162.50			72	119	46.00	Denial of Common Medical History	No	27	12	5-	28-30	No		No				No		No	7		Twin pregnancy^ Dichorionic diamniotic twins ,High-risk pregnancy care^BMI<18.5		BMI＜18.5,Twin pregnancy	30	Good	2022-07-22
670			29			Henan Province	Non-local permanent residents	Undergraduate degree	Office Personnel and Related Workers	2022-07-22	2022-07-22	2022-05-14	2023-02-18	9weeks6days	1	0	168.00			62	107	55.00			28	12	7-	28-30	No								No	No		Pregnancy complicated byHPV infection53（+）		Normal	30	Fair	2022-07-22
671			40			Jiangsu Province	Non-local permanent residents	College Diploma	Office Personnel and Related Workers	2022-07-22	2022-07-22	2022-05-04	2023-02-08	11weeks2days	4	2	173.50			50	115	64.00	Denial of Common Medical History	No	27	16	10-15	25-	No		No				No		No	No		Pregnancy Monitoring for Advanced Maternal Age Multiparous Women,Scarred uterus 2 times CS		Age≥35,Scarred uterus, History of various uterine surgeries （ C-S、 Cornual Pregnancy 、 Uterine Leiomyomas myomectomy）≥2	36	Good	2022-07-22
672			37			Henan Province	Non-local permanent residents	Undergraduate degree	Office Personnel and Related Workers	2022-07-22	2022-07-22	2022-05-14	2023-02-18	9weeks6days	2	0	162.00			64	108	70.00	Denial of Common Medical History	No	29	12	5-6	28-	No		No				No		No	No		High-risk pregnancy care, BMI>24		BMI≥24	29	Good	2022-07-22
673			34			Gansu Province	Non-local permanent residents	Postgraduate Education	Office Personnel and Related Workers	2022-07-22	2022-07-22	2022-05-29	2023-03-05	7weeks5days	1	0	172.00			71	116	70.50	Denial of Common Medical History	Folic acid，Dydrogesterone Tablets	24		5-	28-	0	Thyroid nodule，Follow-up thyroid function is normal.	0	No	No	mother has thyroid cancer	0	medicated plaster	No	No		Routine prenatal care,Thyroid nodules		Normal	43	Good	2022-07-22
674			33			Hunan Province	Non-local permanent residents	Postgraduate Education	Office Personnel and Related Workers	2022-07-22	2022-07-22	2022-05-02	2023-02-06	11weeks4days	2	0	162.00			65	105	48.00		Progesterone capsule	32	13	7-	30-	No		No				No		No	No		High-risk pregnancy careBMI<18.5		BMI＜18.5	33	Good	2022-07-22
675			36				Non-local permanent residents	Postgraduate Education	Unclassified Workers	2022-07-22	2022-07-22	2022-05-22	2023-02-26	8weeks5days	2	1	161.00			73	116	56.00	Denial of Common Medical History	Folic acid，VB6，D3	28	14	7-	30-	0		0	No	No	No	0		No	No		High-risk pregnancy care,Pregnancy Monitoring for Advanced Maternal Age Multiparous Women		Age≥35	36	Good	2022-07-22
676			39			Jilin Province	Shanghai	Postgraduate Education	Office Personnel and Related Workers	2022-07-22	2022-07-22	2022-04-30	2023-02-04	11weeks6days			164.00			63	125	62.00			33	12	10-15	28-	No						No		No	No		High-risk pregnancy care,Pregnancy Monitoring for Advanced Maternal Age Primiparous Women		Age≥35	35	Good	2022-07-22
677			34			239900000000	Shanghai	Postgraduate Education	Skilled Professionals	2022-07-22	2022-07-22	2022-04-15	2023-01-20	14weeks	2	1	170.50			62	109	65.00			28	15	7-	30-	No		No				No		No	No		Routine prenatal care		Normal	33	Good	2022-07-22
678			36			320600000000	Shanghai	Postgraduate Education	Office Personnel and Related Workers	2022-07-22	2022-07-22	2022-05-26	2023-03-02	8weeks1days	4	1	160.00			56	96	54.00			28	14	5-7	28-	No		No				No		No	No		h		Normal	35	Good	2022-07-22
679			34			Jiangsu Province	Non-local permanent residents	Undergraduate degree	Unclassified Workers	2022-07-23	2022-07-23	2022-05-06	2023-02-10	11weeks1days			160.00			79	113	56.00			30	14	7-	45-50				No	No	No	No		No	No				Normal	32	Good	2022-07-23
680			33			Shandong Province	Shanghai	Postgraduate Education	Unclassified Workers	2022-07-23	2022-07-23	2022-05-29	2023-03-05	7weeks6days			168.00			60	107	56.00			31	16	7-	30-	No		No				No		No	No		Uterine Leiomyomas		Normal			2022-07-23
681			32			Shanghai	Shanghai	Undergraduate degree	Unclassified Workers	2022-07-23	2022-07-23	2022-05-06	2023-02-10	11weeks1days	1	0	163.50			72	124	55.00			29	16	6-7	30-60	No		No				No		No	No		PCOS,Hyperprolactinemia,Routine prenatal care		Normal	34	Good	2022-07-23
682			31			350700000000	Non-local permanent residents	College Diploma	Office Personnel and Related Workers	2022-07-23	2022-07-23	2022-05-24	2023-02-28	8weeks4days			163.00			67	111	46.00			28	15	7-	28-		No		No	No	No		No	No	No				Normal	31	Good	2022-07-23
683			31			Guangdong Province	Non-local permanent residents	Undergraduate degree	Office Personnel and Related Workers	2022-07-23	2022-07-23	2022-05-10	2023-02-14	10weeks4days	3	1	164.50			70	119	53.00	Denial of Common Medical History	Levothyroxine	27	16	5-	28-	No		No				No		No	No		High-risk pregnancy care, History of COVID-19 positive, currently negative. Subclinical hypothyroidism for 4 weeks, taking Levothyroxine; last week had mild hypothyroidism.		Uncomplicated hypothyroidism requiring medication	35	Good	2022-07-23
684			31			341100000000	Non-local permanent residents	Undergraduate degree	Office Personnel and Related Workers	2022-07-23	2022-07-23	2022-05-25	2023-03-01	8weeks3days	1	0	160.00			60	99	54.50	Infectious hepatitis	No	28	14	7-8	30-	No		No				No		No	No		Hepatitis B surface antigen (HBsAg) positive, anti-HBe positive, and anti-HBc positive 7 years ,High-risk pregnancy care		Hepatitis B virus surface antigen positive and liver function Normal	28	Good	2022-07-23
685			37			Anhui Province	Non-local permanent residents	Undergraduate degree	Operational Staff and Associated Individuals	2022-07-23	2022-07-23	2022-05-08	2023-02-12	10weeks6days	1	0	154.00			58	98	51.00	Denial of Common Medical History	No	33	13	3-5	28-	0	A right ovarian cyst was discovered 1 year ago, self-reported as 6 cm, with regular follow-up	0	Unclear	Unclear		0	No	No	Not clear		Pregnancy Monitoring for Advanced Maternal Age Primiparous Women,Pregnancy with ovarian cyst,Pregnancy with Uterine Scar		Age≥35,Scarred uterus	33	Good	2022-07-23
686			33			Shanghai	Shanghai	Postgraduate Education	Office Personnel and Related Workers	2022-07-23	2022-07-23	2022-05-20	2023-02-24	9weeks1days			170.00			76	117	60.00			32	14	10-15	28-		No		No	No	No	No		No	No		Uterine Leiomyomas,Ovarian cyst		Normal	31	Good	2022-07-23
687			32			Hubei Province	Non-local permanent residents	Undergraduate degree	Skilled Professionals	2022-07-23	2022-07-23	2022-05-04	2023-02-08	11weeks3days	1	0	166.00			76	105	50.00	Denial of Common Medical History	No	26		5-7	29-	No		No	No	No		0	No	No	No		High-risk pregnancy careBMI<18.5		BMI＜18.5	30	Good	2022-07-23
688			36			Shanghai	Shanghai	Vocational Secondary Education	Office Personnel and Related Workers	2022-07-23	2022-07-23	2022-05-12	2023-02-16	10weeks2days	1	0	164.00			96	133	84.00			26	13	4-	30-		PCOS for 5 years, no medication taken. Insulin resistance treated with metformin until 2019. In June 2021, underwent myomectomy and curettage, and has been taking Duphaston since then. Hypertension for 3 years, currently taking nifedipine 1 mg twice daily.		No	No	No			No	No		Pregnancy complicated by chronic hypertension 3 years ,Pregnancy Monitoring for Advanced Maternal Age Primiparous Women,PCOS,Insulin Resistance, Subclinical hypothyroidism ,Scarred uterus Post-myotomy,High-risk pregnancy careBMI≥28		Age≥35,Hypertensive disorders of pregnancy, excluding high-risk (red and orange) categories.,Uncomplicated hypothyroidism requiring medication,BMI≥28,Uterine scar (interval from last uterine surgery <18 months)	38	Good	2022-07-23
689			34			Anhui Province	Non-local permanent residents	Undergraduate degree	Unclassified Workers	2022-07-23	2022-07-23	2022-06-03	2023-03-10	7weeks1days	3	0	168.00			80	128	63.00			28	15	7-	28-30	No		No				No		No	No				Normal	32	Good	2022-07-23
690			30			Shanghai	Shanghai	Undergraduate degree	Unclassified Workers	2022-07-23	2022-07-23	2022-05-16	2023-02-20	9weeks5days	1	0	167.00			68	115	52.50	Denial of Common Medical History	Cetirizine hydrochloride	25	14	7-	37-60	No		No				No		No	No		Routine prenatal care		Normal	28	Good	2022-07-23
691			30			Jiangsu Province	Non-local permanent residents	Other Situations		2022-07-23	2022-07-23	2022-05-02	2023-02-06	11weeks5days			164.00			83	125	51.50			28	14	5-7	-28	No		No				No		No	No				Normal			2022-07-23
692			33			Shandong Province	Shanghai	Postgraduate Education	Unclassified Workers	2022-07-23	2022-07-23	2022-05-28	2023-03-04	8weeks			163.00			73	130	70.00			31	13	6-7	33-	No			No	No	No	No		No	No		2012, left Ovarian cystectomy		Normal	31	Good	2022-07-23
693			33			310100000000	Shanghai	Undergraduate degree	Office Personnel and Related Workers	2022-07-23	2022-07-23	2022-05-13	2023-02-17	10weeks1days	1	0	156.50			51	101	51.50	Denial of Common Medical History		29	12	5-7	27-46	No		No				No		No	No		Routine prenatal care		Normal	34	Good	2022-07-23
694			32			Shanghai	Shanghai	Postgraduate Education	Unclassified Workers	2022-07-23	2022-07-23	2022-05-15	2023-02-19	9weeks6days	2	0	160.00			67	110	56.00			26	14	5-7	30-60	No		No				No		No	No				Normal			2022-07-23
695			30			Gansu Province	Shanghai	Postgraduate Education	Skilled Professionals	2022-07-23	2022-07-23	2022-05-20	2023-02-24	9weeks1days	1	0	174.00			65	105	61.00	Denial of Common Medical History	Levothyroxine	27	12	5-	40-	No		No				No		No	Fever on July 8		High-risk pregnancy care, Subclinical hypothyroidism		Uncomplicated hypothyroidism requiring medication	26	Good	2022-07-23
696			31			Shanghai	Shanghai	Postgraduate Education	Skilled Professionals	2022-07-23	2022-07-23	2022-05-22	2023-02-26	8weeks6days			168.00			74	130	59.00	Denial of Common Medical History	No	27	14	5-7	35-	No		No				No		No	No				Normal			2022-07-23
697			34			421100000000	Non-local permanent residents	Undergraduate degree	Office Personnel and Related Workers	2022-07-23	2022-07-23	2022-05-23	2023-02-27	8weeks5days	3	1	160.00			63	119	65.00			24	13	5-7	26-27	No		No	No	No			No	No	No		High-risk pregnancy care, BMI>24,Scarred uterus 1 time CS		BMI≥24,Scarred uterus	31	Good	2022-07-23
698			31			Shanghai	Shanghai	Postgraduate Education	Unclassified Workers	2022-07-23	2022-07-23	2022-05-08	2023-02-12	10weeks6days	1	0	157.00			52	89	56.00		Progesterone Pregnancy-nourishing pills	28	13	3-5	28-	No		Serious genetic disease (hemophilia)	Unclear	No	Gastric cancer	No		Other Situations	No				Normal	31	Good	2022-07-23
699			32			Hubei Province	Non-local Migrant Population	Vocational Secondary Education	Office Personnel and Related Workers	2022-07-23	2022-07-23	2022-05-18	2023-02-22	9weeks3days	2	1	156.50			59	104	48.00	Denial of Common Medical History	No	27	15	5-	30-	No		No				No		No	No		Routine prenatal care		Normal	31	Good	2022-07-23
700			37				Shanghai	Postgraduate Education	Skilled Professionals	2022-07-23	2022-07-23	2022-05-30	2023-03-06	7weeks5days	2	1	161.50			82	136	62.00		No	25	12	3-5	28-	No		No				No		No	No		Scarred uterus 1 time CS,Pregnancy Monitoring for Advanced Maternal Age Multiparous Women,Multiple Uterine Leiomyomaspossible，3.8*2.3cm		Scarred uterus,Age≥35	36	Good	2022-07-23
701			36			Shanghai	Shanghai	College Diploma	Unclassified Workers	2022-07-23	2022-07-23	2022-06-09	2023-03-16	6weeks2days	3	1	156.00			62	114	85.00			26	14	5-7	35-	No		No				No		No	No		Advanced age ，BMI≥28		Age≥35,BMI≥28	36	Good	2022-07-23
702			37			Shanghai	Shanghai	College Diploma	Unclassified Workers	2022-07-23	2022-07-23	2022-05-24	2023-02-28	8weeks4days	3	1	156.00			61	110	62.50			28		3-5	37-	No		No				No		No	No		High-risk pregnancy careBMI≥24,Pregnancy Monitoring for Advanced Maternal Age Multiparous Women		Age≥35,BMI≥24	34	Good	2022-07-23
703			29			Shanghai	Shanghai	Postgraduate Education	Office Personnel and Related Workers	2022-07-23	2022-07-23	2022-04-04	2023-01-09	15weeks5days			158.00			70	103	50.00			27	14	5-	28-	No		No				No		No	No		Ventricular septal defect		Congenital heart disease: ventricular septal defect without pulmonary hypertension.	28	Good	2022-07-23
704			28			Shanghai	Shanghai	College Diploma	Office Personnel and Related Workers	2022-07-23	2022-07-23	2022-04-30	2023-02-04	12weeks	1	0	160.00			70	126	61.00			24	13	3-4	30-	No		No	No	No		No		No	No		Twin pregnancy Dichorionic diamniotic twins		Twin pregnancy	32	Good	2022-07-23
705			35			Hubei Province	Non-local permanent residents	Postgraduate Education	Skilled Professionals	2022-07-23	2022-07-23	2022-06-01	2023-03-08	7weeks3days	1	0	153.50			48	91	48.00			32	13	7-	31-32	No		No				No		No	No		Routine prenatal care		Normal	36	Good	2022-07-23
706			29			Jiangsu Province	Non-local permanent residents	Undergraduate degree	Office Personnel and Related Workers	2022-07-23	2022-07-23	2022-05-26	2023-03-02	8weeks2days	2	0	163.00			69	116	52.00			26	14	6-	30-		Mammary gland hyperplasia		No	No	No	No		No	No				Normal	27	Good	2022-07-23
707			31			Anhui Province	Non-local permanent residents	Postgraduate Education	Office Personnel and Related Workers	2022-07-23	2022-07-23	2022-05-18	2023-02-22	9weeks3days	2	0	164.00			66	98	56.00			28	12	4-	25-	No		No				No		No	No		Pregnancy complicated by Kidney stone , thyroiditis		Thyroid disease that does not require medication	33	Good	2022-07-23
708			30			Jiangsu Province泰兴	Non-local permanent residents	Undergraduate degree		2022-07-25	2022-07-25	2022-04-28	2023-02-02	12weeks4days			168.00			68	101	50.00			25	17	5-6	28-	No		No				No		No	No				BMI＜18.5,Uterine scar (interval from last uterine surgery <18 months)	29	Good	2022-07-25
709			31			Shanghai	Shanghai	Other Situations	Office Personnel and Related Workers	2022-07-25	2022-07-25	2022-05-12	2023-02-16	10weeks4days	1	0	172.00			68	117	75.00			27	13	5-7	34-			No	No	No		No		No	No				BMI≥24,Cardiovascular system diseases（No medication is required after diagnosis and treatment by cardiologist、Heart functionNormal）	28	Good	2022-07-25
710			35			Jiangsu Province	Shanghai	Postgraduate Education	Office Personnel and Related Workers	2022-07-25	2022-07-25	2022-05-01	2023-02-05	12weeks1days	2	1	162.00			67	100	43.00	Denial of Common Medical History	打过新冠疫苗第一针	31	13	5-7	30-	0	No	0	No	No	No	0	No	No	No				BMI＜18.5	33	Good	2022-07-25
711			34			Shanghai	Shanghai	Postgraduate Education	Office Personnel and Related Workers	2022-07-25	2022-07-25	2022-06-06	2023-03-13	7weeks	1	0	170.00			62	116	63.00			29	12	5-7	28-45	No						No	h	No	No				Normal	36	Good	2022-07-25
712			30			Shanghai	Shanghai	Undergraduate degree	Unclassified Workers	2022-07-25	2022-07-25	2022-05-17	2023-02-21	9weeks6days	1	0	150.50			65	97	42.50	Denial of Common Medical History	Dydrogesterone Tablets	25	12	5-	30-31	No		0	No	No		0	No	No	No		Routine prenatal care		Normal	29	Good	2022-07-25
713			33			Shanghai	Shanghai	Undergraduate degree	Unclassified Workers	2022-07-25	2022-07-25	2022-06-02	2023-03-09	7weeks4days	1	0	157.00			78	122	47.00	Denial of Common Medical History	No	29	13	5-7	30-	No		0	No	No	No	No		No	No				Normal	31	Good	2022-07-25
714			33			Shanghai	Shanghai	Undergraduate degree	Office Personnel and Related Workers	2022-07-25	2022-07-25	2022-06-03	2023-03-10	7weeks3days	1	0	159.00			69	119	49.00			29	12	7-	30-	No							Amoxicillin	No	No				Normal	39	Good	2022-07-25
715			34			Shanghai	Shanghai	Undergraduate degree	Office Personnel and Related Workers	2022-07-25	2022-07-25	2022-05-24	2023-02-28	8weeks6days	1	0	157.50			81	113	61.00			30	14	10-15	28-	No								No	No				Uterine Leiomyomas≥5cm	33		2022-07-25
716			32			510100000000	Non-local permanent residents	Undergraduate degree	Office Personnel and Related Workers	2022-07-25	2022-07-25	2022-05-21	2023-02-25	9weeks2days	2	1	168.00			67	99	63.00			24	14	5-7	26-		No		grandmother had Parkinson's disease	No	No		No	No	No				Normal	31	Good	2022-07-25
717			32			520300000000	Shanghai	Postgraduate Education	Office Personnel and Related Workers	2022-07-25	2022-07-25	2022-05-25	2023-03-01	8weeks5days	2	0	158.00			64	101	46.00	Denial of Common Medical History	No	28	13	10-15	28-	0	No	0	No	No	No	0		No	No				BMI＜18.5	31	Fair	2022-07-25
718			31			Sichuan Province	Non-local permanent residents	Postgraduate Education	Office Personnel and Related Workers	2022-07-25	2022-07-25	2022-04-30	2023-02-04	12weeks2days	1	0	161.00			61	118	67.00	Denial of Common Medical History	No	28	14	4-6	28-30	No		No				No		No	No		High-risk pregnancy careBMI≥24		BMI≥24	29	Good	2022-07-25
719			30			Jiangsu Province	Non-local permanent residents	College Diploma	Office Personnel and Related Workers	2022-07-25	2022-07-25	2022-05-28	2023-03-04	8weeks2days	1	0	163.00			65	98	44.00			28	14	5-7	28-		No		No	No	No			No	No				BMI＜18.5	30	Good	2022-07-25
720			42			411600000000	Shanghai	College Diploma	Unclassified Workers	2022-07-25	2022-07-25	2022-05-28	2023-03-04	8weeks2days	8	1	163.00			86	131	63.00			28	13	7-10	28-	No		No				No		No	No				Age≥40			2022-07-25
721			31				Shanghai	Other Situations	Unclassified Workers	2022-07-25	2022-07-25	2022-05-23	2023-02-27	9weeks	1	0	165.00			75	133	65.00			30	12	5-	28-	No						No		No	No		Routine prenatal care		Normal	32	Good	2022-07-25
722			34			Hubei Province	Shanghai	Postgraduate Education	Office Personnel and Related Workers	2022-07-25	2022-07-25	2022-05-16	2023-02-20	10weeks	2	0	160.00			88	146	65.00	Denial of Common Medical History	Dydrogesterone Tablets、Chinese herbal supplement for pregnancy support,	29	12	7-	30-	0	A teratoma was discovered over six months ago, with regular follow-up	0	No	No	No	0		No	No		High-risk pregnancy careBMI≥24,Pregnancy with ovarian cyst Teratoma ？		BMI≥24	32	Good	2022-07-25
723			31			Anhui Province	Non-local permanent residents	Undergraduate degree	Office Personnel and Related Workers	2022-07-25	2022-07-25	2022-05-24	2023-02-28	8weeks6days	1	0	166.00			71	118	58.50	Denial of Common Medical History	No	27	12	6-	28-	No		No				No		No	No		High-risk pregnancy care LEEP		2|4|Other Situations Yellow alert classification ;Assessment Other Situations:Post-conization of the Cervix.	30	Good	2022-07-25
724			41				Shanghai	Undergraduate degree	Unclassified Workers	2022-07-25	2022-07-25	2022-05-20	2023-02-24	9weeks3days	3	1	170.00			67	100	51.00	Denial of Common Medical History		32	14	5-6	27-	No		0			mother has heart disease	No		No	No				BMI＜18.5,Age≥40	34	Good	2022-07-25
725			28				Shanghai	Other Situations	Unclassified Workers	2022-07-25	2022-07-25	2022-06-01	2023-03-08	7weeks5days	3	0	168.00			77	116	60.00			25	14	7-	30-60	No		No				No		No	No				Assisted reproductive pregnancy	31	Good	2022-07-25
726			36			Anhui Province	Non-local permanent residents	Vocational Secondary Education	Office Personnel and Related Workers	2022-07-26	2022-07-26	2022-04-30	2023-02-04	12weeks3days	2	1	165.00			63	115	58.00	Denial of Common Medical History	No	24	14	7-	28-	No		0	No	No		0	No	No	No		Scarred uterus 1 time CS		Scarred uterus	33	Good	2022-07-26
727			34			Anhui Province	Non-local permanent residents	Senior Secondary Education	Commercial and Service Industry Personnel	2022-07-26	2022-07-26	2022-05-15	2023-02-19	10weeks2days	4	1	155.00			64	121	45.00			32	15	7-	30-	No		No				No		No	No		Scarred uterus 1 time CS		Scarred uterus	34	Good	2022-07-26
728			25			Shandong Province	Non-local permanent residents	Vocational Secondary Education	Unclassified Workers	2022-07-26	2022-07-26	2022-04-29	2023-02-03	12weeks4days	3	0	163.00			71	112	46.00			22	14	5-7	32-	No		No				No		No	No					23	Good	2022-07-26
729			32			Henan Province	Non-local permanent residents	Undergraduate degree	Skilled Professionals	2022-07-26	2022-07-26	2022-05-06	2023-02-10	11weeks4days	1	0	158.50			65	96	60.00	Denial of Common Medical History	Folic acid	30	13	5-6	28-	No		No				No		No	with		Routine prenatal care		Normal	31	Good	2022-07-26
730			28			Shanghai	Shanghai	Undergraduate degree	Office Personnel and Related Workers	2022-07-26	2022-07-26	2022-05-15	2023-02-19	10weeks2days	2	0	166.50			68	114	57.00			25	12	3-5	30-		No		No	No	No		No	No	No		Routine prenatal care		Normal	28	Good	2022-07-26
731			32			Hebei Province	Shanghai	Postgraduate Education	Office Personnel and Related Workers	2022-07-26	2022-07-26	2022-05-29	2023-03-05	8weeks2days	1	0	165.00			64	108	54.00	Denial of Common Medical History		29	13	7-	32-	No		0	No	No	No	0	Gentamicin	No	No		Routine prenatal care		Normal	29	Good	2022-07-26
732			27			Anhui Province	Non-local permanent residents	Senior Secondary Education	Office Personnel and Related Workers	2022-07-26	2022-07-26	2022-05-09	2023-02-13	11weeks1days	2	0	165.00			69	100	57.50			25	14	5-6	28-30	No		No				No		No	No		Scarred uterus with one myometrial resection.		Uterine scar (interval from last uterine surgery <18 months)	33	Good	2022-07-26
733			30			Jiangsu Province	Non-local permanent residents	Postgraduate Education	Office Personnel and Related Workers	2022-07-26	2022-07-26	2022-05-12	2023-02-16	10weeks5days	1	0	160.00			58	102	61.00	Denial of Common Medical History	No	27	13	3-4	28-	No		No				No		No	No		Routine prenatal care		Normal	32	Fair	2022-07-26
734			35			320900000000	Shanghai	Undergraduate degree	Office Personnel and Related Workers	2022-07-26	2022-07-26	2022-05-29	2023-03-05	8weeks2days	1	0	169.00			66	106	82.00	Denial of Common Medical History	Levothyroxine	30	12	5-7	28-30	No		No				No		No	No		High-risk pregnancy care,Obesity,Hypothyroidism		BMI≥28,Uncomplicated hypothyroidism requiring medication	33	Good	2022-07-26
735			35			Anhui Province	Non-local Migrant Population	Undergraduate degree	Unclassified Workers	2022-07-26	2022-07-26	2022-04-12	2023-01-17	15weeks	3	1	148.50			49	128	48.00			27	15	2-	28-	No		No				No		No	No		Scarred uterus 1 time CS		Scarred uterus	36	Good	2022-07-26
736			29			Jiangxi Province	Shanghai	Postgraduate Education	Office Personnel and Related Workers	2022-07-26	2022-07-26	2022-05-28	2023-03-04	8weeks3days	1	0	163.50			67	103	47.00	Denial of Common Medical History	Progesterone	28	14	4-6	35-	Urinary system diseases	Hives (urticaria) for over 2 years, previously treated with antihistamines, but medication was discontinued after discovering pregnancy.	Serious genetic diseases （Genetic hyperlipidemia）	No	No		Procaine		Alcohol	No		High-risk pregnancy careBMI<18.5		BMI＜18.5	30	Good	2022-07-26
737			41				Shanghai	Undergraduate degree	Unclassified Workers	2022-07-26	2022-07-26	2022-05-06	2023-02-10	11weeks4days	2	0	163.00			63	103	53.00		Dydrogesterone Tablets	37	13	5-7	30-	No						No		No	No		High-risk pregnancy care,Pregnancy Monitoring for Advanced Maternal Age Primiparous Women,IVF pregnancy status		Assisted reproductive pregnancy,Age≥40	44	Good	2022-07-26
738			27			Anhui Province	Non-local permanent residents	College Diploma	Office Personnel and Related Workers	2022-07-26	2022-07-26	2022-05-05	2023-02-09	11weeks5days	1	0	170.50			72	114	65.00	Denial of Common Medical History	Progesterone，Kidney-nourishing and yin-tonifying pills	25	12	10-15	28-	No		No				No		No	No		Routine prenatal care		Normal	27	Good	2022-07-26
739			30			Shanghai	Shanghai	Undergraduate degree	Public Servants	2022-07-26	2022-07-26	2022-05-20	2023-02-24	9weeks4days	1	0	167.00			66	112	76.00	Denial of Common Medical History	Nifuratel tablets，hpv interferon ，Nifuratel suppositories	29	14	6-7	30-31	No		0	No	No	No	0	No	No	No		Pregnancy complicated byHPV infection39（+）,High-risk pregnancy careBMI>24		BMI≥24	35	Good	2022-07-26
740			41			Zhejiang Province	Shanghai	Undergraduate degree	Skilled Professionals	2022-07-26	2022-07-26	2022-05-09	2023-02-13	11weeks1days	1	0	167.00			84	120	50.00		Folic acid	37	13	6-7	30-60	No		0	No	No	No	0	No	No	No		Pregnancy Monitoring for Advanced Maternal Age Primiparous Women,High-risk pregnancy careBMI<18.5		BMI＜18.5,Age≥40	32	Good	2022-07-26
741			32			Anhui Province	Non-local permanent residents	Undergraduate degree	Office Personnel and Related Workers	2022-07-27	2022-07-27	2022-05-15	2023-02-19	10weeks3days	1	0	160.50			76	119	72.50			30	12	5-	30-		Right breast nodule, excised in August 2021, diagnosed as a fibroma		No	No	No		No	No	No				BMI≥28	32	Good	2022-07-27
742			33			Shaanxi Province	Shanghai	Postgraduate Education	Commercial and Service Industry Personnel	2022-07-27	2022-07-27	2022-05-04	2023-02-08	12weeks	2	1	165.00			65	101	49.00			30	13	10-12	30-	No		No				No		No	No		High-risk pregnancy careBMI<18.5。 Previous pregnancy with hyperthyroidism, no medication taken. History of smoking.		BMI＜18.5,2|4|Other Situations Yellow alert classification ;Assessment Other Situations:History of smoking, hyperthyroidism during the previous pregnancy	42	Good	2022-07-27
743			35			Anhui Province	Non-local permanent residents	Undergraduate degree	Unclassified Workers	2022-07-27	2022-07-27	2022-05-03	2023-02-07	12weeks1days	1	0	162.00			62	96	69.00			30	12	5-	30-	No		No				No		No	No				BMI≥24			2022-07-27
744			28			Anhui Province	Non-local permanent residents	College Diploma	Skilled Professionals	2022-07-27	2022-07-27	2022-05-19	2023-02-23	9weeks6days	1	0	165.00			65	103	65.00	Denial of Common Medical History	Dydrogesterone Tablets	26	14	5-	30-	No		0	No	No	No	No		No	No				Normal	31	Good	2022-07-27
745			33			Sichuan Province	Non-local permanent residents	Vocational Secondary Education	Operational Staff and Associated Individuals	2022-07-27	2022-07-27	2022-05-31	2023-03-07	8weeks1days	3	0	164.50			67	112	48.00	Denial of Common Medical History	Antiabortifacient	32	13	7-	28-37	No		No	No	No		0	No	No	No		High-risk pregnancy careBMI＜18.5		BMI＜18.5	37	Good	2022-07-27
746			35			Shanghai	Shanghai	Undergraduate degree	Unclassified Workers	2022-07-27	2022-07-27	2022-05-09	2023-02-13	11weeks2days	2	0	160.00			74	106	63.00			33	13	5-7	28-30	No		No				No		No	No				BMI≥24	35	Good	2022-07-27
747			34			Shanghai	Shanghai	Undergraduate degree	Office Personnel and Related Workers	2022-07-27	2022-07-27	2022-05-31	2023-03-07	8weeks1days	3	0	154.00			79	123	57.00	Denial of Common Medical History		26	13	7-9	30-	0	Uterine adenomyosis for 2 years, untreated	0				No		No	No		High-risk pregnancy careBMI≥24		BMI≥24	32	Good	2022-07-27
748			29			Jiangsu Province	Shanghai	Postgraduate Education	Skilled Professionals	2022-07-27	2022-07-27	2022-06-01	2023-03-08	8weeks	1	0	165.00			53	105	51.00			26	13	7-	30-		Hashimoto's thyroiditis for 1 year, with elevated TPO and Tg antibodies. Treated with selenium yeast for 1 month, but medication was discontinued on their own. Reports that thyroid function is good during follow-up.		No	No	No		No	No	No		Hashimoto's thyroiditis,High-risk pregnancy care		Thyroid disease that does not require medication	32	Good	2022-07-27
749			26			509900000000	Non-local permanent residents	Undergraduate degree	Unclassified Workers	2022-07-27	2022-07-27	2022-04-27	2023-02-01	13weeks	2	0	166.00			68	107	48.00			25	16	7-	28-		Smoked for 1 year, reporting 1 cigarette per month, and has quit smoking for 1 year	No				No		No	No		High-risk pregnancy careBMI＜18.5		BMI＜18.5	33	Fair	2022-07-27
750			31			Anhui Province	Non-local permanent residents	Undergraduate degree	Office Personnel and Related Workers	2022-07-27	2022-07-27	2022-05-21	2023-02-25	9weeks4days	2	0	162.00			64	105	50.00	Denial of Common Medical History	Dienogest Progesterone、Conservation Pill	28	14	5-	30-	0	Candidiasis infection, HPV 52 (now negative)	0	No	No	No	0	No	No	No				Normal	30	Good	2022-07-27
751			31			Gansu Province	Non-local permanent residents	Undergraduate degree	Office Personnel and Related Workers	2022-07-27	2022-07-27	2022-04-17	2023-01-22	14weeks3days	1	0	162.00			80	112	51.00			29	13	3-	28-	No		No				No		No	No		High-risk pregnancy care,Hepatitis B surface antigen (HBsAg) positive, anti-HBe positive, and anti-HBc positive		Hepatitis B virus surface antigen positive and liver function Normal	28	Good	2022-07-27
752			29			Jiangsu Province	Non-local permanent residents	Undergraduate degree	Office Personnel and Related Workers	2022-07-27	2022-07-27	2022-05-22	2023-02-26	9weeks3days	1	0	161.00			72	121	70.00	Denial of Common Medical History	No	26	12	4-6	34-35	No		No	No	No		No		No	No		High-risk pregnancy careBMI≥24		BMI≥24	28	Good	2022-07-27
753			31			Jiangsu Province	Non-local permanent residents	Undergraduate degree	Skilled Professionals	2022-07-27	2022-07-27	2022-05-21	2023-02-25	9weeks4days	1	0	160.00			68	116	51.00	Denial of Common Medical History	Stomach medicine	29	15	15-30	35-	No		No				No		Radiation	No				Normal	29	Good	2022-07-27
754			35			Hunan Province	Non-local permanent residents	Undergraduate degree	Office Personnel and Related Workers	2022-07-27	2022-07-27	2022-05-15	2023-02-19	10weeks3days	3	1	159.50			77	120	57.00	Denial of Common Medical History	Dydrogesterone Tablets	27	13	5-	30-31	0	Gestational diabetes mellitus (A1) in the previous pregnancy, with normal blood sugar postpartum.	0	No	No	No	No		No	No		Pregnancy supervision with a history of embryonic arrest 1 time,High-risk pregnancy care Previous pregnancy GDM（A1）		2|4|Other Situations Yellow alert classification ;Assessment Other Situations:Previous pregnancy with GDM (A1), post-hysteroscopy	34	Good	2022-07-27
755			31			Hebei Province	Non-local permanent residents	Undergraduate degree	Skilled Professionals	2022-07-28	2022-07-28	2022-05-23	2023-02-27	9weeks3days	1	0	154.00			65	100	44.00			26	14	6-7	30-	No		No				No		No	No		Routine prenatal care		Normal	35	Good	2022-07-28
756			30			Shaanxi Province	Non-local permanent residents	College Diploma	Office Personnel and Related Workers	2022-07-28	2022-07-28	2022-06-01	2023-03-08	8weeks1days	3	0	172.00			75	113	45.00			28	13	7-	30-	No						No		No	No		High-risk pregnancy care		BMI＜18.5	37	Good	2022-07-28
757			34			Hebei Province	Non-local permanent residents	Undergraduate degree	Unclassified Workers	2022-07-28	2022-07-28	2022-05-22	2023-02-26	9weeks4days	1	0	160.50			74	114	63.90			28	12	5-	37-	No		No				No		No	No		High-risk pregnancy careBMI≥24		BMI≥24	34	Good	2022-07-28
758			33			Shanghai	Shanghai	Other Situations	Unclassified Workers	2022-07-28	2022-07-28	2022-06-08	2023-03-15	7weeks1days			161.00			66	126	52.00	Denial of Common Medical History	No	31	14	5-	30-	0	No	0	No	No	No	No		No	No				Normal	31	Good	2022-07-28
759			29			Shanghai	Shanghai	Undergraduate degree	Skilled Professionals	2022-07-28	2022-07-28	2022-05-22	2023-02-26	9weeks4days	2	0	157.00			77	125	50.00			25	16	7-	28-	No		No				No		No	No		High-risk pregnancy care, post-operative care for patients with serous cystadenoma of the ovary.		Prior pelvic surgery	29	Good	2022-07-28
760			29			Guizhou Province	Non-local permanent residents	Undergraduate degree	Office Personnel and Related Workers	2022-07-28	2022-07-28	2022-06-03	2023-03-10	7weeks6days	1	0	166.50			62	107	53.00	Denial of Common Medical History	No	27	14	3-4	37-	No		No	No	No		Procaine		Alcohol	No		Routine prenatal care		Normal	35	Good	2022-07-28
761			28			Jiangsu Province	Non-local permanent residents	Undergraduate degree	Office Personnel and Related Workers	2022-07-28	2022-07-28	2022-05-25	2023-03-01	9weeks1days	1	0	162.50			52	99	50.00	Denial of Common Medical History	Dydrogesterone Tablets，Chinese herbal supplement for pregnancy support,，Metformin hydrochloride	26	14	3-4	30-	0	Endometrial-like carcinoma stage I, 3 years post-surgery. Currently taking metformin 2 tablets three times a day; after removing the Mirena IUD in January 2022, has been taking Daflon 1 tablet three times a day until now	0	No	No	grandmother with hypertension Cerebral vascular malformationCerebral vascular malformation	No		No	No		Personal history of malignant tumor, post-operative endometrial cancer, high-risk pregnancy care.		Prior pelvic surgery,2|4|Other Situations Yellow alert classification ;Assessment Other Situations: hysteroscopic surgery ,No metastasis or recurrence after treatment of malignant tumor	26	Good	2022-07-28
762			32			Hunan Province	Shanghai	Postgraduate Education	Skilled Professionals	2022-07-28	2022-07-28	2022-06-10	2023-03-17	6weeks6days	2	0	155.00			45	112	48.00			30	14	7-8	30-	No			No	No	No	No		No	No		Routine prenatal care		Normal	31	Good	2022-07-28
763			31			Jiangsu Province	Shanghai	Undergraduate degree	Office Personnel and Related Workers	2022-07-28	2022-07-28	2022-06-09	2023-03-16	7weeks	1	0	164.00			55	95	55.00			29	16	4-	35-	No							Clindamycin	No	No		Routine prenatal care		Normal	35	Good	2022-07-28
764			40			411700000000	Non-local Migrant Population	Postgraduate Education	Skilled Professionals	2022-07-28	2022-07-28	2022-05-08	2023-02-12	11weeks4days	6	2	166.50			62	108	52.00			28	13	5-	26-	No		No				No		No	No		Pregnancy Monitoring for Advanced Maternal Age Multiparous Women,Pregnancy supervision with a history of embryonic arrest,Monitoring of pregnancy with a history of fetal malformation Missed abortion of embryo in 2020 with chromosomal analysis showing trisomy 15 ,History of multiple miscarriages3		Various types of miscarriage ≥3 times,Adverse obstetric history,2|1.7.7|Other SituationsAdverse obstetric history; Other Situations:History of previous placenta implantation may,Age≥40	42	Good	2022-07-28
765			32			341000000000	Shanghai	Postgraduate Education	Unclassified Workers	2022-07-28	2022-07-28	2022-05-20	2023-02-24	9weeks6days	1	0	172.00			80	123	55.00	Denial of Common Medical History	Progesterone	27	11	7-	30-	No		No	No	No		No		No	No		Routine prenatal care		Normal	30	Good	2022-07-28
766			26			Henan Province	Non-local permanent residents	Senior Secondary Education	Unclassified Workers	2022-07-28	2022-07-28	2022-05-13	2023-02-17	10weeks6days	1	0	158.00			70	118	72.00	Denial of Common Medical History	No	23	13	6-7	25-30	No		No				No		No	No		High-risk pregnancy care		BMI≥28			2022-07-28
767			30			Shanghai	Shanghai	College Diploma	Office Personnel and Related Workers	2022-07-28	2022-07-28	2022-06-12	2023-03-19	6weeks4days	1	0	167.00			72	118	54.00	Denial of Common Medical History	No	28	12	5-	30-	0		0	No	No	No	0	No	No	No		Routine prenatal care		Normal	31	Good	2022-07-28
768			27				Non-local permanent residents	Undergraduate degree	Unclassified Workers	2022-07-28	2022-07-28	2022-05-10	2023-02-14	11weeks2days	1	0	163.00			65	111	51.50		Folic acid，DHA	25	14	5-7	30-	No		No				No		No	No		Routine prenatal care		Normal	35	Good	2022-07-28
769			35			Shanghai	Shanghai	Postgraduate Education	Unclassified Workers	2022-07-28	2022-07-28	2022-05-30	2023-03-06	8weeks3days	1	0	176.00			67	102	64.00				12	4-5	23-	No		No				No		No	No		Routine prenatal care,Uterine Leiomyomaspossible，34*22*29mm		Normal			2022-07-28
770			30			Hunan Province	Non-local permanent residents	Postgraduate Education	Skilled Professionals	2022-07-28	2022-07-28	2022-05-07	2023-02-11	11weeks5days	1	0	160.50			69	112	52.00			27	15	6-	30-50	No		No				No		No	No		Routine prenatal care		Normal	30	Good	2022-07-28
771			29			219900000000	Non-local permanent residents	Undergraduate degree	Office Personnel and Related Workers	2022-07-28	2022-07-28	2022-06-01	2023-03-08	8weeks1days	1	0	168.00			86	129	86.00			26	12	3-5	32-40		PCOS (Polycystic Ovary Syndrome) for 9 years, with no medication taken in the past 2 years.	No						No	No		High-risk pregnancy careBMI≥28,PCOS		Prior pelvic surgery,BMI≥28	31		2022-07-28
772			45			Shandong Province	Shanghai	Postgraduate Education	Skilled Professionals	2022-07-28	2022-07-28	2022-05-05	2023-02-09	12weeks	5	2	168.00			76	123	62.00	Denial of Common Medical History	Antiabortifacient	26	14	6-	28-	No		0	No	No	No	No		No	No		Pregnancy Monitoring for Advanced Maternal Age Multiparous Women,Scarred uterus2 CS,Monitoring of pregnancy with a history of fetal malformation		Scarred uterus,2|1.7.7|Other SituationsAdverse obstetric history;Assessment Other Situations:History of death 2 months postpartum in the first pregnancy,Age≥40, History of various uterine surgeries （ C-S、 Cornual Pregnancy 、 Uterine Leiomyomas myomectomy）≥2	45	Good	2022-07-28
773			36			Jiangsu Province	Non-local permanent residents	Undergraduate degree	Unclassified Workers	2022-07-28	2022-07-28	2022-05-18	2023-02-22	10weeks1days	5	2	157.00			79	131	70.00			26	13	5-	35-		GDM	No				No		No	No		Pregnancy Monitoring for Advanced Maternal Age Multiparous Women,Diabetes complicated with pregnancy,High-risk pregnancy careBMI≥28,Scarred uterus2 CS,Multiple Uterine Leiomyomas		Age≥35,Scarred uterus,BMI≥28, History of various uterine surgeries （ C-S、 Cornual Pregnancy 、 Uterine Leiomyomas myomectomy）≥2 , Diabetes requiring medication	37	Good	2022-07-28
774			33			Jiangsu Province	Non-local permanent residents	Undergraduate degree	Unclassified Workers	2022-07-29	2022-07-29	2022-05-26	2023-03-02	9weeks1days	2	1	160.50			55	90	60.00			25	14	5-	28-	No		No	No	No	No	No		No	No		High-risk pregnancy care^ History of pelvic surgery		Prior pelvic surgery	33	Good	2022-07-29
775			32			Anhui Province	Non-local permanent residents	Undergraduate degree	Office Personnel and Related Workers	2022-07-29	2022-07-29	2022-05-10	2023-02-14	11weeks3days	1	0	159.50			57	95	48.00			27	13	5-	35-	No		No				No		No	No		Routine prenatal care		Normal	30	Good	2022-07-29
776			33			Jiangsu Province	Shanghai	Postgraduate Education	Skilled Professionals	2022-07-29	2022-07-29	2022-05-06	2023-02-10	12weeks	4	1	173.50			61	109	70.00	Denial of Common Medical History	No	27	15	6-	30-	No		No				No		No	No		Routine prenatal care		Normal	31	Good	2022-07-29
777			32			Hunan Province	Non-local Migrant Population	Undergraduate degree	Office Personnel and Related Workers	2022-07-29	2022-07-29	2022-04-19	2023-01-24	14weeks3days			158.00			52	97	45.00			28	13	3-4	30-	No		No				No		No	No					34	Good	2022-07-29
778			31				Non-local permanent residents	Undergraduate degree	Unclassified Workers	2022-07-29	2022-07-29	2022-05-20	2023-02-24	10weeks	3	1	159.00			57	101	57.00	Denial of Common Medical History		26	12	5-7	30-	No		No				No		No	No		High-risk pregnancy care,Scarred uterus		Scarred uterus	29	Good	2022-07-29
779			35			Anhui Province	Non-local permanent residents	College Diploma	Office Personnel and Related Workers	2022-07-29	2022-07-29	2022-05-15	2023-02-19	10weeks5days	1	0	151.50			67	124	44.00			30	13	4-6	32-		06-29 TSH：4.21 uIU/ml，07-13 Euthyrox0.5# qd，The pregnant woman has been taking medication irregularly due to severe vomiting.		No	No	No	No		No	No		Cervical polyps, Subclinical hypothyroidism ,Pregnancy Monitoring for Advanced Maternal Age Primiparous Women		Uncomplicated hypothyroidism requiring medication,Age≥35	30	Good	2022-07-29
780			35			Shanxi Province	Shanghai	Postgraduate Education	Unclassified Workers	2022-07-29	2022-07-29	2022-06-06	2023-03-13	7weeks4days	1	0	169.00			77	128	68.00	Denial of Common Medical History		28	12	5-	35-	No		No				No		No	No		Subclinical hypothyroidism ,High-risk pregnancy care		Uncomplicated hypothyroidism requiring medication	33	Good	2022-07-29
781			32			510700000000	Non-local permanent residents	Vocational Secondary Education	Office Personnel and Related Workers	2022-07-29	2022-07-29	2022-05-27	2023-03-03	9weeks	4	1	160.50			62	100	51.50			30	12	5-7	28-	No		No				No		No	No		Pregnancy supervision with a history of ectopic pregnancy Unilateral salpingectomy，Detail not clear,Scarred uterus 1 time CS		Scarred uterus,Prior pelvic surgery	32	Good	2022-07-29
782			30			Henan Province	Shanghai	Postgraduate Education	Office Personnel and Related Workers	2022-07-29	2022-07-29	2022-05-17	2023-02-21	10weeks3days	1	0	167.50			52	91	58.00			27	13	5-7	28-30		Uterine adenomyosis for 1 year, with severe dysmenorrhea, treated with dispersing and analgesic capsules until May 2022. Reports high Anti-TPO for 4 years, untreated, with regular check-ups, and states thyroid function is good. In July 2022, Anti-TPO was 106.40 IU/ml.		No	No	No			No	No		PDA Claims to be completely cured.,Adenomyosis,Routine prenatal care		ongenital heart disease: atrial septal defect, ventricular septal defect, patent ductus arteriosus without pulmonary hypertension.	31	Good	2022-07-29
783			30				Non-local permanent residents	Other Situations	Unclassified Workers	2022-07-29	2022-07-29	2022-06-08	2023-03-15	7weeks2days			164.00			69	104	61.50		Vitamin B6	27	12	7-	30-	No		0				No		No	No		Routine prenatal care		Normal	32	Good	2022-07-29
784			32			341800000000	Shanghai	Postgraduate Education	Office Personnel and Related Workers	2022-07-29	2022-07-29	2022-05-17	2023-02-21	10weeks3days	1	0	163.50			65	118	51.00	Denial of Common Medical History	???	26	15	6-7	30-	No		0	No	No	No	No		No	No		Routine prenatal care		Normal	34	Good	2022-07-29
785			29			429000000000	Non-local permanent residents	Postgraduate Education	Office Personnel and Related Workers	2022-07-29	2022-07-29	2022-05-27	2023-03-03	9weeks	2	0	161.00			81	122	50.00			27	16	6-	30-	No		No	No	No			No	No	No		Routine prenatal care		Normal	27	Good	2022-07-29
786			32			Hunan Province	Shanghai	Postgraduate Education	Office Personnel and Related Workers	2022-07-29	2022-07-29	2022-05-20	2023-02-24	10weeks	1	0	165.00			60	89	60.00	Denial of Common Medical History		28	12	6-	31-	No		No				No		No	No		Routine prenatal care		Normal	32	Good	2022-07-29
787			32			Henan Province	Non-local permanent residents	Undergraduate degree	Unclassified Workers	2022-07-29	2022-07-29	2022-05-06	2023-02-10	12weeks	1	0	162.50			71	127	55.00	Denial of Common Medical History	No	24	14	6-7	30-	No		No				No		No	No		Routine prenatal care		Normal	34	Good	2022-07-29
788			32			Shanghai	Shanghai	Postgraduate Education	Office Personnel and Related Workers	2022-07-29	2022-07-29	2022-05-29	2023-03-05	8weeks5days	2	0	171.50			67	117	64.00			28	15	3-5	28-	No			No	No		No		No	No		Pregnancy supervision with a history of embryonic arrest		Normal	30	Good	2022-07-29
789			28			Jiangsu Province	Non-local permanent residents	Undergraduate degree	Office Personnel and Related Workers	2022-07-29	2022-07-29	2022-05-08	2023-02-12	11weeks5days	1	0	164.00			59	97	60.00			30	13	4-5	28-	No		No				No		No	No		Routine prenatal care		Normal	34	Good	2022-07-29
790			36				Non-local permanent residents	Other Situations		2022-07-29	2022-07-29	2022-05-18	2023-02-22	10weeks2days			155.00			78	105	45.00	Denial of Common Medical History	femibion , Folic acid	35	14	3-	28-	No		No				No		No	No		High-risk pregnancy care,Pregnancy Monitoring for Advanced Maternal Age Primiparous Women		Age≥35			2022-07-29
791			33			Jiangsu Province	Shanghai	Undergraduate degree	Office Personnel and Related Workers	2022-07-29	2022-07-29	2022-05-27	2023-03-03	9weeks	2	0	160.50			58	91	51.00			29	14	6-7	30-	No		No	No	No		No		No	No		Routine prenatal care		Normal	32	Good	2022-07-29
792			29			Shanghai	Shanghai	Postgraduate Education	Office Personnel and Related Workers	2022-07-29	2022-07-29	2022-05-31	2023-03-07	8weeks3days	1	0	165.00			56	103	53.00	Denial of Common Medical History	Folic acid	27	13	7-	28-	0	Over 20 years ago, had severe myasthenia gravis, specifics unclear, reports that it is now cured	0	No	No	No	No		No	No		Myasthenia gravis ^?		Ocular myasthenia gravis	42	Good	2022-07-29
793			25			Jiangxi Province	Non-local permanent residents	College Diploma	Unclassified Workers	2022-07-29	2022-07-29	2022-04-30	2023-02-04	12weeks6days	1	0	166.50			73	100	44.00			23	14	-	30-	No		No	No	No			Essential oil allergy	No	No		High-risk pregnancy care		BMI＜18.5	31	Good	2022-07-29
794			35			Jiangsu Province	Shanghai	Postgraduate Education	Office Personnel and Related Workers	2022-07-29	2022-07-29	2022-04-30	2023-02-04	12weeks6days	2	1	165.50			57	88	48.00			26	12	7-	30-	No		No	No	No		No		No	No		High-risk pregnancy careBMI＜18.5		BMI＜18.5	35	Good	2022-07-29
795			38			Hunan Province	Non-local permanent residents	College Diploma	Unclassified Workers	2022-07-29	2022-07-29	2022-05-19	2023-02-23	10weeks1days	1	0	151.00			75	120	45.00	Denial of Common Medical History	DHA,Folic acid	36	13	5-7	23-45	No		No				No		No	No		High-risk pregnancy care,Pregnancy Monitoring for Advanced Maternal Age Primiparous Women		Age≥35	37	Good	2022-07-29
796			31			321300000000	Non-local permanent residents	Undergraduate degree	Office Personnel and Related Workers	2022-07-29	2022-07-29	2022-05-06	2023-02-10	12weeks	1	0	168.00			64	111	60.00	Denial of Common Medical History	No	30	12	6-	28-	0	Smoked for 1 year, reporting a small amount of 1 cigarette per month, and has quit smoking for 5 months.	No	No	No		0	No	No	No		Routine prenatal care		Normal	31	Good	2022-07-29
797			30			Shanghai	Shanghai	College Diploma	Office Personnel and Related Workers	2022-07-29	2022-07-29	2022-06-05	2023-03-12	7weeks5days			160.00			65	105	48.00			29	13	6-	30-	No		No				No		No	No		Routine prenatal care		Normal	31	Good	2022-07-29
798			32			Zhejiang Province	Shanghai	Postgraduate Education	Office Personnel and Related Workers	2022-07-29	2022-07-29	2022-04-30	2023-02-04	12weeks6days	1	0	163.00			80	112	62.00		Dydrogesterone Tablets	28	14	6-7	45-60	No		0	No	No		No		No	No		Routine prenatal care		Normal	32	Good	2022-07-29
799			36			Shanghai	Shanghai	Undergraduate degree	Office Personnel and Related Workers	2022-07-29	2022-07-29	2022-05-18	2023-02-22	10weeks2days	2	1	156.00			63	110	50.00	Denial of Common Medical History	No	27	15	7-	30-	No		No				No		Alcohol	No		Pregnancy Monitoring for Advanced Maternal Age Multiparous Women		Age≥35	37	Good	2022-07-29
800			28			Shanghai	Shanghai	Undergraduate degree	Office Personnel and Related Workers	2022-07-29	2022-07-29	2022-05-27	2023-03-03	9weeks	1	0	164.00			57	101	47.50	Denial of Common Medical History	No	24	12	7-	31-	No		No	No	No		No		No	No		High-risk pregnancy careBMI＜18.5		BMI＜18.5	30	Good	2022-07-29
801			35			Shanghai	Shanghai	College Diploma	Office Personnel and Related Workers	2022-07-30	2022-07-30	2022-06-03	2023-03-10	8weeks1days	3	1	161.00			63	108	54.00			34	14	5-	28-	No		No				No		No	No				Scarred uterus			2022-07-30
802			33			Shandong Province	Non-local permanent residents	Postgraduate Education	Unclassified Workers	2022-07-30	2022-07-30	2022-06-11	2023-03-18	7weeks	1	0	160.00			78	122	51.00			31	14	5-	30-	No						No		No	No				Normal	32	Good	2022-07-30
803			36			Jiangsu Province	Shanghai	Postgraduate Education	Skilled Professionals	2022-07-30	2022-07-30	2022-05-23	2023-02-27	9weeks5days	2	1	170.50			65	97	58.00			27	14	5-	28-	No		No				No		No	No		Pregnancy Monitoring for Advanced Maternal Age Multiparous Women		Age≥35	34	Good	2022-07-30
804			34			Anhui Province	Non-local permanent residents	Undergraduate degree	Unclassified Workers	2022-07-30	2022-07-30	2022-05-28	2023-03-04	9weeks	2	0	156.00			65	108	52.00			30	14	7-	30-	No		No				No		No	No		Uterine Leiomyomas		Normal	37	Good	2022-07-30
805			34			Jiangsu Province	Non-local permanent residents	Undergraduate degree	Office Personnel and Related Workers	2022-07-30	2022-07-30	2022-05-23	2023-02-27	9weeks5days	1	0	158.00			70	113	48.00	Denial of Common Medical History	No	30	14	7-	28-39	No		0	No	No		No		No	No		Routine prenatal care		Normal	33	Good	2022-07-30
806			34			Shanghai	Shanghai	Other Situations	Unclassified Workers	2022-07-30	2022-07-30	2022-05-28	2023-03-04	9weeks			150.00			83	110	46.00			32	13	5-	30-	No						No		No	No				Normal	31		2022-07-30
807			33				Non-local permanent residents	Undergraduate degree	Unclassified Workers	2022-07-30	2022-07-30	2022-05-22	2023-02-26	9weeks6days	1	0	157.00			85	146	65.00			26	14	4-6	35-				Hypertension	No		No		No	No		High-risk pregnancy careBMI≥24,hypertensionpossible,Candidal vaginitis		BMI≥24	34	Good	2022-07-30
808			33			Jiangsu Province	Shanghai	Postgraduate Education	Unclassified Workers	2022-07-30	2022-07-30	2022-05-29	2023-03-05	8weeks6days	1	0	166.00			73	128	55.00	Denial of Common Medical History	No	28	13	6-7	29-30	No		No	No	No		No		No	No		Routine prenatal care		Normal	31	Good	2022-07-30
809			30			Henan Province	Non-local permanent residents	Undergraduate degree	Unclassified Workers	2022-07-30	2022-07-30	2022-05-29	2023-03-05	8weeks6days	2	0	163.00			75	116	55.00	Denial of Common Medical History	No	26	14	5-7	30-	No		No				No		No	No				Normal	29	Good	2022-07-30
810			33			Shanghai	Shanghai	Undergraduate degree	Unclassified Workers	2022-07-30	2022-07-30	2022-05-14	2023-02-18	11weeks	3	1	163.50			69	104	53.50			27	15	3-5	29-	No		No				No		No	No		Routine prenatal careHPV52 infection		Normal	36	Good	2022-07-30
811			33			Shandong Province	Shanghai	Postgraduate Education	Office Personnel and Related Workers	2022-07-30	2022-07-30	2022-06-02	2023-03-09	8weeks2days	1	0	168.00			60	104	55.00	Denial of Common Medical History	Levothyroxine	29	13	6-	26-28	0	Hypothyroidism for 6 months, taking Euthyrox 0.5 tablets once daily from July to August until now.	No	No	No		No		No	No		Hypothyroidism,High-risk pregnancy care		Uncomplicated hypothyroidism requiring medication	31	Good	2022-07-30
812			25			Jiangsu Province	Non-local permanent residents	College Diploma	Office Personnel and Related Workers	2022-07-30	2022-07-30	2022-06-01	2023-03-08	8weeks3days	1	0	159.50			76	131	56.00			24	18	7-	14-30	No		No				No		No	No		Routine prenatal care,PCOS		Normal	31	Good	2022-07-30
813			32				Non-local permanent residents	Vocational Secondary Education	Unclassified Workers	2022-07-30	2022-07-30	2022-05-13	2023-02-17	11weeks1days	2	1	159.00			59	99	47.00				15	8-	28-30	No		No				No		No	No		Scarred uterus^ 1 time CS,HPV infection^33,High-risk pregnancy care, Low-grade squamous intraepithelial lesion (LSIL)^Post-laser surgery		Scarred uterus,2|4|Other Situations Yellow alert classification ;Assessment Other Situations:HPV33+，Postoperative status after LSIL (Low-Grade Squamous Intraepithelial Lesion) laser treatment.	31	Good	2022-07-30
814			34			Jiangsu Province	Non-local permanent residents	Other Situations	Unclassified Workers	2022-07-30	2022-07-30	2022-05-29	2023-03-05	8weeks6days	2	0	160.00			67	119	48.00			33	15	7-10	27-	No		No				0		No	No		Uterine Leiomyomas,|Intrauterine band possible		Normal	28	Good	2022-07-30
815			32			Hubei Province	Shanghai	Postgraduate Education	Office Personnel and Related Workers	2022-07-30	2022-07-30	2022-06-13	2023-03-20	6weeks5days	1	0	161.00			58	91	55.00	Denial of Common Medical History	Dydrogesterone Tablets	29	12	5-6	27-28	No		No	No	No		No		No	No		Routine prenatal care		Normal	32	Good	2022-07-30
816			26			Zhejiang Province	Non-local permanent residents	Undergraduate degree	Office Personnel and Related Workers	2022-07-30	2022-07-30	2022-05-29	2023-03-05	8weeks6days	1	0	167.00			60	102	58.00	Denial of Common Medical History	No	26	13	4-	28-35	0	History of gastric antrum inflammation	No	No	No		No		No	No		Routine prenatal care		Normal	32	Good	2022-07-30
817			33			Shanghai	Shanghai	Undergraduate degree	Skilled Professionals	2022-07-30	2022-07-30	2022-05-19	2023-02-23	10weeks2days	1	0	172.50			74	117	58.60			27	14	7-8	30-60		Hypothyroidism 2 years， irrIrregular medication use， Euthyrox0.5# qd		No	No	No		Pioneer Metamrol	No	No		Hypothyroidism,High-risk pregnancy care		Uncomplicated hypothyroidism requiring medication	33	Good	2022-07-30
818			38			Fujian Province	Non-local permanent residents	Undergraduate degree	Office Personnel and Related Workers	2022-07-30	2022-07-30	2022-06-08	2023-03-15	7weeks3days	1	0	159.00			74	126	54.00	Denial of Common Medical History	No	36	14	5-	28-	No		0	No	No	No	No		No	No		Pregnancy Monitoring for Advanced Maternal Age Primiparous Women		Age≥35	42	Good	2022-07-30
819			28			Jiangsu Province	Non-local permanent residents	Undergraduate degree	Office Personnel and Related Workers	2022-07-30	2022-07-30	2022-06-05	2023-03-12	7weeks6days	1	0	163.00			63	127	76.00			25	12	5-	30-	No		No				No		No	No		Uterine Leiomyomas		BMI≥28	27	Good	2022-07-30
820			33			Fujian Province	Non-local permanent residents	College Diploma	Office Personnel and Related Workers	2022-07-30	2022-07-30	2022-05-11	2023-02-15	11weeks3days	1	0	164.00			67	120	55.00	Denial of Common Medical History	No	30	13	5-6	28-	No		No				No		No	No		Congenital cleft lip, surgical treatment. High-risk pregnancy care		2|4|Other Situations Yellow alert classification ;Assessment Other Situations:Congenital cleft lip, treated with surgery	30	Good	2022-07-30
821			33			Jiangsu Province	Non-local permanent residents	Undergraduate degree	Unclassified Workers	2022-07-30	2022-07-30	2022-06-03	2023-03-10	8weeks1days	1	0	163.00			66	105	49.00	Denial of Common Medical History		31	12	5-7	28-	No		No	No	No		No		No	No				BMI＜18.5	33	Good	2022-07-30
822			29			Henan Province	Non-local permanent residents	Undergraduate degree	Unclassified Workers	2022-07-30	2022-07-30	2022-05-22	2023-02-26	9weeks6days	1	0	160.00			76	114	44.00			24	14	5-7	30-50	No		No				No		No	No				BMI＜18.5	25	Good	2022-07-30
823			31			Anhui Province	Non-local permanent residents	Postgraduate Education	Office Personnel and Related Workers	2022-07-30	2022-07-30	2022-05-26	2023-03-02	9weeks2days	1	0	159.50			65	106	48.00	Denial of Common Medical History	No	28	26	6-7	30-	No		No				No		No	No		Routine prenatal care		Normal	36	Good	2022-07-30
824			30			Shanghai	Shanghai	Undergraduate degree	Unclassified Workers	2022-07-30	2022-07-30	2022-05-24	2023-02-28	9weeks4days	1	0	163.00			70	101	50.00		Dydrogesterone Tablets	26	14	7-10	30-	No		0				0		No	No				Normal	30	Good	2022-07-30
825			31			Hubei Province	Non-local permanent residents	College Diploma	Office Personnel and Related Workers	2022-07-30	2022-07-30	2022-05-26	2023-03-02	9weeks2days	1	0	166.00			67	110	62.00	Denial of Common Medical History	Levothyroxine	29	13	6-	27-30	No		No				No		No	No		Hypothyroidism,High-risk pregnancy care		Uncomplicated hypothyroidism requiring medication	30	Good	2022-07-30
826			31			Shanghai	Shanghai	Postgraduate Education	Office Personnel and Related Workers	2022-07-30	2022-07-30	2022-05-01	2023-02-05	12weeks6days	1	0	165.50			71	119	72.00	Denial of Common Medical History	Niuhuangjiedu Tablets	23	11	5-7	30-90	No		No	No	No		No		No	No		High-risk pregnancy careBMI≥24		BMI≥24	32	Good	2022-07-30
827			30			Shanxi Province	Non-local permanent residents	Other Situations	Office Personnel and Related Workers	2022-07-30	2022-07-30	2022-05-10	2023-02-14	11weeks4days	2	0	159.00			71	123	71.50	Denial of Common Medical History	Levothyroxine	26	13	4-6	33-40	0	Post-operative for papillary thyroid cancer for 3 years, regular follow-up, currently taking Euthyrox 2.5# daily.	No	No	No		No		No	No		High-risk pregnancy careBMI≥28,History of thyroid cancer Postoperative papillary thyroid carcinoma		BMI≥28,No metastasis or recurrence after treatment of malignant tumor	32	Good	2022-07-30
828			31			Jilin Province	Shanghai	Postgraduate Education	Unclassified Workers	2022-07-30	2022-07-30	2022-05-31	2023-03-07	8weeks4days	3	0	153.50			70	104	44.00	Denial of Common Medical History	No	28	14	5-	28-	No		No	No	No		No		smooking	0		Routine prenatal care		Normal	31	Good	2022-07-30
829			30				Non-local permanent residents	College Diploma	Unclassified Workers	2022-07-30	2022-07-30	2022-04-26	2023-01-31	13weeks4days	1	0	162.00			64	107	51.50			27	13	3-7	28-30	No		No	No	No		No		No	No		Routine prenatal care		Diabetes without medication	37	Good	2022-07-30
830			34			Jiangsu Province	Non-local permanent residents	Undergraduate degree	Unclassified Workers	2022-07-30	2022-07-30	2022-05-25	2023-03-01	9weeks3days	1	0	162.00			51	85	49.00			32	13	5-	30-	No		No				No		No	No				Normal	33	Good	2022-07-30
831			29			Jiangsu Province	Non-local permanent residents	College Diploma	Unclassified Workers	2022-07-30	2022-07-30	2022-05-18	2023-02-22	10weeks3days	1	0	160.00			80	117	80.00	Denial of Common Medical History	Progesterone，Pregnancy-nourishing pills	24	16	5-7	60-	0		No	mother having Congenital heart disease (atrial septal defect)			No		No	No		Pregnancy complicated byObesity		BMI≥28	28	Good	2022-07-30
832			35			Heilongjiang Province	Shanghai	Postgraduate Education	Skilled Professionals	2022-07-30	2022-07-30	2022-05-05	2023-02-09	12weeks2days	2	1	166.00			68	118	56.00	Denial of Common Medical History	Levothyroxine	28	13	5-7	26-28	Cardiovascular disease	Taking 1 tablet of Euthyrox orally per day, with normal thyroid function	Family history of hypertension, Serious genetic diseases （Genetic hyperlipidemia）0/Other Situations 0mmHg	No	No	No	No		Radiation	No		High-risk pregnancy care,Hypothyroidism		Uncomplicated hypothyroidism requiring medication	35	Good	2022-07-30
833			40			Jiangsu Province	Shanghai	Undergraduate degree	Office Personnel and Related Workers	2022-08-01	2022-08-01	2022-05-05	2023-02-09	12weeks4days	3	1	167.00			61	114	65.00			30	16	3-	28-	No		No				No		No	No		Pregnancy Monitoring for Advanced Maternal Age Multiparous Women		Age≥35	44	Good	2022-08-01
834			28			Henan Province	Non-local permanent residents	Undergraduate degree	Skilled Professionals	2022-08-01	2022-08-01	2022-05-07	2023-02-11	12weeks2days	1	0	165.00			70	99	53.50	Denial of Common Medical History	No	26	15	5-	30-40	No		No				No		No	No				Normal	30		2022-08-01
835			33			319900000000	Shanghai	College Diploma	Office Personnel and Related Workers	2022-08-01	2022-08-01	2022-05-11	2023-02-15	11weeks5days	3	1	173.00			63	110	70.00			27	13	7-	30-	No			No	No	No	No		No	No				Reproductive tract malformations	32	Good	2022-08-01
836			27			Henan Province	Non-local permanent residents	College Diploma	Office Personnel and Related Workers	2022-08-01	2022-08-01	2022-05-09	2023-02-13	12weeks	2	0	166.00			62	108	69.00	Denial of Common Medical History	No	23	14	7-10	28-	No		No				No		No	No		High-risk pregnancy careBMI＞24		BMI≥24,Adverse obstetric history	28	Good	2022-08-01
837			29			Jiangsu Province	Non-local permanent residents	Undergraduate degree	Office Personnel and Related Workers	2022-08-01	2022-08-01	2022-06-16	2023-03-23	6weeks4days	2	0	160.00			59	94	54.00	Denial of Common Medical History	No	28	14	3-5	30-34	No		No				No		No	No		Routine prenatal care		Normal	31	Good	2022-08-01
838			33			Jiangsu Province	Non-local permanent residents	College Diploma	Unclassified Workers	2022-08-01	2022-08-01	2022-05-21	2023-02-25	10weeks2days	3	0	160.50			66	102	48.50	Denial of Common Medical History	Antiabortifacient	28	12	5-6	35-40	0	Insulin resistance for 6 months, taking metformin 1# twice daily until 6 weeks of pregnancy; antiphospholipid antibody syndrome	0	Unclear	Unclear	Unclear	No		No	No		Insulin Resistance,Pregnancy complicated by Antiphospholipid antibody syndrome ,High-risk pregnancy care		2|4|Other Situations Yellow alert classification ;Assessment Other Situations:Positive antiphospholipid antibodies +	34	Good	2022-08-01
839			33			Henan Province	Non-local permanent residents	Undergraduate degree	Office Personnel and Related Workers	2022-08-01	2022-08-01	2022-04-04	2023-01-09	17weeks	1	0	169.00			75	119	73.00	Denial of Common Medical History	No	29	14	5-7	28-	0		0	Unclear	Unclear	Unclear	No		No	No				BMI≥24	31	Fair	2022-08-01
840			27				Shanghai	Other Situations		2022-08-01	2022-08-01	2022-06-05	2023-03-12	8weeks1days	1	0	173.00			49	97	72.00			24	13	5-6	30-40	No		No				No		No	No		High-risk pregnancy care		BMI≥24	27		2022-08-01
841			30				Non-local permanent residents	Postgraduate Education	Unclassified Workers	2022-08-01	2022-08-01	2022-05-12	2023-02-16	11weeks4days	1	0	160.00			73	113	61.00			27	15	15-30	32-	No		No				No		No	No				Normal	30	Good	2022-08-01
842			28			Shanghai	Shanghai	Undergraduate degree	Unclassified Workers	2022-08-01	2022-08-01	2022-05-28	2023-03-04	9weeks2days	1	0	177.50			97	130	62.00			26	16	5-7	28-	No						No		No	No				Normal	29	Good	2022-08-01
843			36			220200000000	Shanghai	Postgraduate Education	Office Personnel and Related Workers	2022-08-01	2022-08-01	2022-05-12	2023-02-16	11weeks4days	1	0	168.00			64	113	47.00	Denial of Common Medical History	No	34	14	15-30	27-	No		No				No		No	No		Pulmonary tuberculosis ^ medical history ,High-risk pregnancy care		Age≥35,BMI＜18.5	38	Good	2022-08-01
844			32			Jiangsu Province	Shanghai	Postgraduate Education	Office Personnel and Related Workers	2022-08-01	2022-08-01	2022-05-11	2023-02-15	11weeks5days	2	0	157.00			75	129	54.00	Denial of Common Medical History	Antiabortifacient	29	15	7-	30-	No		No	No	No		No		No	No		Pregnancy supervision with a history of embryonic arrest^ History of fetal loss due to chromosomal abnormalities		Normal	29	Good	2022-08-01
845			35			Shanghai	Shanghai	Undergraduate degree	Office Personnel and Related Workers	2022-08-01	2022-08-01	2022-05-03	2023-02-07	12weeks6days	1	0	172.00			75	109	64.00			27	12	7-	28-	No		No				No		No	No		Routine prenatal care		Normal	35	Good	2022-08-01
846			31			Jiangxi Province	Non-local permanent residents	Undergraduate degree	Office Personnel and Related Workers	2022-08-01	2022-08-01	2022-06-06	2023-03-13	8weeks			156.00			71	115	46.00			27	14	15-30	36-	No		No				No		No	No				Normal	33	Good	2022-08-01
847			35			Shanghai	Shanghai	Postgraduate Education	Office Personnel and Related Workers	2022-08-02	2022-08-02	2022-05-27	2023-03-03	9weeks4days	3	1	173.00			75	121	60.00	Denial of Common Medical History	Elevit	28	13	-	28-33	No		No				No		No	No		Scarred uterusOne cesarean section		Scarred uterus	34	Good	2022-08-02
848			30			Zhejiang Province	Shanghai	Undergraduate degree	Skilled Professionals	2022-08-02	2022-08-02	2022-05-21	2023-02-25	10weeks3days	1	0	162.00			72	119	53.00	Denial of Common Medical History	No	26	14	-	36-	No		No				No		No	No		thyroiditis,High-risk pregnancy care		Thyroid disease that does not require medication	34	Good	2022-08-02
849			36			Henan Province	Shanghai	Postgraduate Education	Office Personnel and Related Workers	2022-08-02	2022-08-02	2022-06-02	2023-03-09	8weeks5days	1	0	171.00			74	123	68.00	Denial of Common Medical History		31	14	10-15	27-	No			No	No	No	No		No	No		Pregnancy Monitoring for Advanced Maternal Age Primiparous Women		Age≥35	35	Good	2022-08-02
850			33			371000000000	Shanghai	Postgraduate Education	Skilled Professionals	2022-08-02	2022-08-02	2022-05-11	2023-02-15	11weeks6days	3	1	172.00			73	112	65.00			28	14	-	28-	0	Surgery for left ovarian cyst in 2020.	0	No	No	No	No		No	No		Routine prenatal care		Normal	31	Good	2022-08-02
851			31			Henan Province	Non-local permanent residents	College Diploma	Office Personnel and Related Workers	2022-08-02	2022-08-02	2022-06-05	2023-03-12	8weeks2days	1	0	162.50			59	105	47.00	Denial of Common Medical History	Chinese herbal supplement for pregnancy support,/Progesterone/金 Silian	29	14	10-15	-	No		Serious genetic diseases （Genetic hyperlipidemia）			No	No		Alcohol	No		High-risk pregnancy careBMI＜18.5		BMI＜18.5	28	Good	2022-08-02
852			31			Anhui Province	Non-local permanent residents	Undergraduate degree	Skilled Professionals	2022-08-02	2022-08-02	2022-05-09	2023-02-13	12weeks1days	1	0	163.50			53	97	56.00			30	12	10-15	33-	No		No				No		No	No		Routine prenatal care		Normal	34	Good	2022-08-02
853			28			Shanghai	Shanghai	College Diploma	Unclassified Workers	2022-08-02	2022-08-02	2022-05-10	2023-02-14	12weeks	2	0	164.50			76	118	67.00			23	15	5-7	30-		No				amblyopia	No		No	No		High-risk pregnancy careBMI≥24		BMI≥24,Prior pelvic surgery	25		2022-08-02
854			28			Anhui Province	Non-local permanent residents	Postgraduate Education	Office Personnel and Related Workers	2022-08-02	2022-08-02	2022-06-06	2023-03-13	8weeks1days	2	0	160.00			72	117	50.00	Denial of Common Medical History	No	26	21	-	28-	0	Left ureteral stricture, surgical treatment has been performed	0	No	No	No	0	No	No	No		Routine prenatal care		Normal	27	Good	2022-08-02
855			35			445200000000	Shanghai	Undergraduate degree	Office Personnel and Related Workers	2022-08-02	2022-08-02	2022-06-05	2023-03-12	8weeks2days	2	0	157.50			56	93	57.00	Infectious hepatitis	Hepatitis	32	13	15-30	30-	0	In February 2022, liver function abnormalities were detected, with positive hepatitis B surface antigen (HBsAg) indicating active hepatitis B infection. Treatment included liver protection and antiviral medication, and follow-up showed normal liver function.	0	No	No	No	0	Erythromycin	No	No		High-risk pregnancy care,Hepatitis B surface antigen (HBsAg), hepatitis B e antigen (HBeAg), and anti-hepatitis B core antibody (anti-HBc) positive		Hepatitis B virus surface antigen positive and liver function Normal	36	Good	2022-08-02
856			40			350700000000	Non-local permanent residents	College Diploma	Office Personnel and Related Workers	2022-08-02	2022-08-02	2022-05-28	2023-03-04	9weeks3days	2	1	147.50			52	91	56.00			26	13	3-	30-	No		0				No		No	No		High-risk pregnancy care,Pregnancy Monitoring for Advanced Maternal Age Multiparous Women,Scarred uterus		Age≥35,BMI≥24,Scarred uterus	43	Good	2022-08-02
857			28			329900000000	Shanghai	Undergraduate degree	Office Personnel and Related Workers	2022-08-02	2022-08-02	2022-05-26	2023-03-02	9weeks5days	1	0	154.00			67	107	50.00	Denial of Common Medical History	Allylestrenol Tablets，ZiShenYuTaiWan	26	14	-	30-60	No		No		No		0	No	No	No		Routine prenatal care		Normal	35	Good	2022-08-02
858			41			Shanghai	Shanghai	Postgraduate Education	Office Personnel and Related Workers	2022-08-02	2022-08-02	2022-05-18	2023-02-22	10weeks6days	1	0	167.50			83	133	57.50			39	16	7-10	30-34	No		No				No		No	No		Pregnancy Monitoring for Advanced Maternal Age Primiparous Women,Uterine Leiomyomas		Age≥40			2022-08-02
859			29			Zhejiang Province	Non-local permanent residents	College Diploma	Commercial and Service Industry Personnel	2022-08-02	2022-08-02	2022-03-28	2023-01-02	18weeks1days	4	2	160.50			72	118	72.00			20	12	10-15	30-	No		No				No		No	No		High-risk pregnancy care^BMI≥28		BMI≥28	31	Good	2022-08-02
860			27			Shanghai	Shanghai	College Diploma	Office Personnel and Related Workers	2022-08-02	2022-08-02	2022-05-25	2023-03-01	9weeks6days	3	0	177.00			63	113	61.90			23	13	5-	30-		No	No				No		No	No		High-risk pregnancy care,Early pregnancy,Pregnancy with a history of spontaneous abortion（ A single instance of chromosomal abnormality in an embryo.）		Adverse obstetric history	27	Good	2022-08-02
861			33			500100000000	Non-local permanent residents	Postgraduate Education	Skilled Professionals	2022-08-02	2022-08-02	2022-05-25	2023-03-01	9weeks6days	1	0	163.50			66	100	62.00	Denial of Common Medical History	No	29	12	15-30	36-	No		No				No		No	No		Routine prenatal care		Normal	31	Good	2022-08-02
862			32			Shandong Province	Shanghai	Postgraduate Education	Skilled Professionals	2022-08-02	2022-08-02	2022-05-21	2023-02-25	10weeks3days	1	0	177.00			65	110	64.00			28	12	15-30	26-	No		No				No		No	No		Routine prenatal care		Normal	31	Good	2022-08-02
863			36				Shanghai	Other Situations	Unclassified Workers	2022-08-02	2022-08-02	2022-05-30	2023-03-06	9weeks1days	2	1	163.00			67	110	58.00			27	14	5-	28-	No						No		No	No		High-risk pregnancy care,Pregnancy Monitoring for Advanced Maternal Age Multiparous Women		Age≥35,Prior pelvic surgery			2022-08-02
864			32			Shanghai	Shanghai	Postgraduate Education	Office Personnel and Related Workers	2022-08-02	2022-08-02	2022-05-23	2023-02-27	10weeks1days	1	0	171.50			67	99	54.00	Denial of Common Medical History	No	28	12	-	31-	No		No				No		Alcohol	No		High-risk pregnancy careBMI＜18.5,Uterine leiomyomas, multiple		BMI＜18.5	33	Good	2022-08-02
865			42			Zhejiang Province	Shanghai	Undergraduate degree	Unclassified Workers	2022-08-02	2022-08-02	2022-05-20	2023-02-24	10weeks4days	2	0	165.00			54	110	62.00	Denial of Common Medical History	Antiabortifacient	39	15	5-7	30-	No		0				No		No	No		High-risk pregnancy care,Pregnancy Monitoring for Advanced Maternal Age Primiparous Women		Age≥40	40	Good	2022-08-02
866			35			Jiangxi Province	Non-local permanent residents	College Diploma	Office Personnel and Related Workers	2022-08-03	2022-08-03	2022-06-07	2023-03-14	8weeks1days	4	1	167.00			80	156	62.00	Denial of Common Medical History	No	26	13	15-30	32-	0	Ectopic pregnancy diagnosed in 2017, treated conservatively with medication	0	No	No	No	0	No	No	No		Pregnancy supervision with a history of ectopic pregnancy,Pregnancy supervision with a history of embryonic arrest		2|4|Other Situations Yellow alert classification	35	Good	2022-08-03
867			38			320500000000	Shanghai	Postgraduate Education	Office Personnel and Related Workers	2022-08-03	2022-08-03	2022-05-21	2023-02-25	10weeks4days	2	1	161.00			62	101	50.00			25	14	10-15	25-	No		No				No		No	No		Pregnancy Monitoring for Advanced Maternal Age Multiparous Women		Age≥35	37	Good	2022-08-03
868			31			Jiangsu Province	Shanghai	Undergraduate degree	Office Personnel and Related Workers	2022-08-03	2022-08-03	2022-06-02	2023-03-09	8weeks6days	1	0	159.00			70	106	49.00			30	13	5-6	28-	No		No				No		No	No		Candidal vaginitis		Normal	28	Good	2022-08-03
869			28			Anhui Province	Non-local permanent residents	Other Situations	Unclassified Workers	2022-08-03	2022-08-03	2022-05-17	2023-02-21	11weeks1days	3	1	164.00			90	142	56.00			21	15	6-7	30-35	No		No				No		No	No				Scarred uterus	29	Fair	2022-08-03
870			35			Anhui Province	Non-local permanent residents	College Diploma	Office Personnel and Related Workers	2022-08-03	2022-08-03	2022-05-11	2023-02-15	12weeks	2	1	159.50			91	134	57.50	Denial of Common Medical History	No	24	14	10-15	33-	0	History of sinusitis	0	No	No	No	0	No	No	No		Scarred uterus^History of cesarean section in the previous pregnancy,High-risk pregnancy care^ Previous pregnancy Preeclampsia medical history , Cervical polyps		Scarred uterus,2|4|Other Situations Yellow alert classification ;Assessment Other Situations:History of Preeclampsia in Previous Pregnancy	32	Good	2022-08-03
871			33			341100000000	Shanghai	Postgraduate Education	Unclassified Workers	2022-08-03	2022-08-03	2022-05-29	2023-03-05	9weeks3days	1	0	172.00			65	117	68.60	Denial of Common Medical History	No	29	12	7-10	31-	No		No				No		No	No		Routine prenatal care		Diabetes without medication	32	Good	2022-08-03
872			24			Yunnan Province	Non-local permanent residents	Vocational Secondary Education	Office Personnel and Related Workers	2022-08-03	2022-08-03	2022-05-07	2023-02-11	12weeks4days	1	0	158.00			75	116	49.00			24	12	-	28-	No		No				No		No	No		Routine prenatal care		Normal	27	Good	2022-08-03
873			33			鲁	Shanghai	Postgraduate Education	Unclassified Workers	2022-08-03	2022-08-03	2022-05-15	2023-02-19	11weeks3days	1	0	156.50			65	109	49.00			30	12	-	32-		No		No	No	No	No		No	No				Normal	32	Good	2022-08-03
874			32			Hebei Province	Shanghai	Postgraduate Education	Skilled Professionals	2022-08-03	2022-08-03	2022-06-03	2023-03-10	8weeks5days	1	0	172.50			68	106	65.00	Denial of Common Medical History	Folic acid，Dydrogesterone Tablets	30	14	10-15	30-	0	No	0	No	No	No	0	No	No	No		Routine prenatal care		Normal	31	Good	2022-08-03
875			28			139900000000	Non-local permanent residents	College Diploma	Unclassified Workers	2022-08-03	2022-08-03	2022-05-21	2023-02-25	10weeks4days	1	0	170.00			79	127	58.00	Denial of Common Medical History		22		15-30	30-	No		No	No	No		No		No	No		Routine prenatal care		Normal	27	Good	2022-08-03
876			27			Jiangsu Province	Non-local permanent residents	Other Situations	Unclassified Workers	2022-08-03	2022-08-03	2022-06-13	2023-03-20	7weeks2days	1	0	165.00			64	103	53.00			23	15	10-15	30-	No		No						No	No				Normal	27	Good	2022-08-03
877			34			Sichuan Province	Non-local permanent residents	College Diploma	Unclassified Workers	2022-08-03	2022-08-03	2022-05-30	2023-03-06	9weeks2days	3	0	157.00			61	106	48.00			27	13	5-7	35-		History of breast nodules surgery. Mild left-sided tinnitus started in April 2022, treated with oral ginkgo biloba and mecobalamin. In 2019, induction of labor was performed due to fetal clubfoot (fetal chromosomal microdeletion).		No	No	No	No		No	No		Monitoring of pregnancy with a history of fetal malformation, with previous induced abortion due to fetal talipes equinovarus and amniocentesis showing a deletion of chromosome 16.		Adverse obstetric history	32	Good	2022-08-03
878			30			Henan Province	Shanghai	Postgraduate Education	Skilled Professionals	2022-08-03	2022-08-03	2022-05-26	2023-03-02	9weeks6days	1	0	165.00			67	108	49.00	Denial of Common Medical History	No	27	12	10-15	30-	No		No				No		No	No		Routine prenatal care		BMI＜18.5	27	Good	2022-08-03
879			38			Liaoning Province	Shanghai	Undergraduate degree	Office Personnel and Related Workers	2022-08-03	2022-08-03	2022-06-04	2023-03-11	8weeks4days	2	1	159.00			68	119	55.50	Denial of Common Medical History	Levothyroxine	28	14	-	28-	No		No				No		No	No		Pregnancy Monitoring for Advanced Maternal Age Multiparous Women,Pregnancy complicated by hypothyroidism		Age≥35,Uncomplicated hypothyroidism requiring medication	36	Good	2022-08-03
880			34			350700000000	Non-local permanent residents	Junior Secondary Education	Commercial and Service Industry Personnel	2022-08-03	2022-08-03	2022-06-06	2023-03-13	8weeks2days	1	0	158.00			42	91	53.50			23	14	-	30-			No					No	No	No		Routine prenatal care		Normal	45	Good	2022-08-03
881			29			Jiangsu Province	Shanghai	Undergraduate degree	Skilled Professionals	2022-08-03	2022-08-03	2022-05-18	2023-02-22	11weeks	1	0	153.00			65	96	54.00		No	25	14	15-30	33-	No		No				No		No	No		Routine prenatal care		Normal	31	Good	2022-08-03
882			32			Jiangsu Province	Shanghai	Postgraduate Education	Office Personnel and Related Workers	2022-08-03	2022-08-03	2022-05-20	2023-02-24	10weeks5days	1	0	167.00			61	111	57.00			28	12	10-15	28-	No		No				No		No	No		Routine prenatal care		Normal	29	Good	2022-08-03
883			25			310100000000	Shanghai	Other Situations	Unclassified Workers	2022-08-03	2022-08-03	2022-05-28	2023-03-04	9weeks4days	1	0	165.00			66	103	43.00			23	15	-	30-	No		No				No		No	No				BMI＜18.5	29	Good	2022-08-03
884			31			Jiangsu Province	Non-local permanent residents	Undergraduate degree	Office Personnel and Related Workers	2022-08-03	2022-08-03	2022-05-28	2023-03-04	9weeks4days	2	0	168.00			67	112	60.00			26	14	5-7	30-							No		No	No				Endocrine system diseases	32	Good	2022-08-03
885			41			Shanghai	Shanghai	College Diploma	Office Personnel and Related Workers	2022-08-04	2022-08-04	2022-05-14	2023-02-18	11weeks5days	6	1	158.00			71	133	64.00	Denial of Common Medical History	No	35	13	-	35-	No		No				No		No	No		Scarred uterus, cesarean section in 2019. Pregnancy Monitoring for Advanced Maternal Age Multiparous Women		Age≥35,BMI≥24,Scarred uterus, Various types of miscarriage ≥3	39	Good	2022-08-04
886			30			Jiangsu Province	Non-local permanent residents	Undergraduate degree	Skilled Professionals	2022-08-04	2022-08-04	2022-06-01	2023-03-08	9weeks1days	1	0	166.50			66	115	54.00			29	16	-	31-		Diagnosed with Hashimoto's thyroiditis in 2016. Had short-term medication, after which thyroid function returned to normal, and medication was discontinued as per doctor's advice.		No	No			Animal hair	No	No		Routine prenatal care		Normal	33	Good	2022-08-04
887			28			Shanghai	Shanghai	Vocational Secondary Education	Unclassified Workers	2022-08-04	2022-08-04	2022-06-08	2023-03-15	8weeks1days	3	0	168.50			88	108	80.00			23	12	-	20-25	Endocrine system diseases	No	No				Alcohol	No	Other Situations	No		High-risk pregnancy care BMI＞28		Uncomplicated hypothyroidism requiring medication,BMI≥28	34	Good	2022-08-04
888			31			Shanghai	Shanghai	Undergraduate degree	Office Personnel and Related Workers	2022-08-04	2022-08-04	2022-06-03	2023-03-10	8weeks6days	2	0	167.00			65	104	58.00			27	13	10-15	25-				No	No				No	No		Hashimoto's thyroiditis,High-risk pregnancy care^APS?		Uncomplicated hypothyroidism requiring medication,Immune system disorders	37	Good	2022-08-04
889			31				Non-local permanent residents	Vocational Secondary Education	Unclassified Workers	2022-08-04	2022-08-04	2022-05-17	2023-02-21	11weeks2days	5	1	166.00			68	104	65.00			29	13	7-	30-		History of cesarean section (CS), history of molar pregnancy, history of preterm birth, and history of gestational hypertension in previous pregnancy.	No				No		No	No				Adverse obstetric history,Scarred uterus	28	Fair	2022-08-04
890			34			Anhui Province	Non-local permanent residents	Other Situations	Office Personnel and Related Workers	2022-08-04	2022-08-04	2022-06-18	2023-03-25	6weeks5days	1	0	160.00			66	100	42.30			28	12	5-7	28-30	No						No		No	No				BMI＜18.5	32	Good	2022-08-04
891			42			Jilin Province	Non-local permanent residents	College Diploma	Unclassified Workers	2022-08-04	2022-08-04	2022-06-19	2023-03-26	6weeks4days	6	1	168.00			54	85	61.00		No	38	13	7-	24-	No		0	No	No	No	0	No	No	No		Pregnancy Monitoring for Advanced Maternal Age Multiparous Women		Age≥40	58	Good	2022-08-04
892			28			Shanghai	Shanghai	Undergraduate degree	Office Personnel and Related Workers	2022-08-04	2022-08-04	2022-05-20	2023-02-24	10weeks6days	1	0	169.50			72	115	66.00	Denial of Common Medical History	No	26	14	-	28-	No		No				No		No	No		Routine prenatal care		Normal	35	Good	2022-08-04
893			37			610300000000	Shanghai	Postgraduate Education	Office Personnel and Related Workers	2022-08-04	2022-08-04	2022-05-21	2023-02-25	10weeks5days	2	1	158.00			58	107	57.00			25	14	5-7	28-	No		No				No		No	No		Scarred uterus,Pregnancy Monitoring for Advanced Maternal Age Multiparous Women		Age≥35,Scarred uterus	40	Good	2022-08-04
894			34			Hubei Province	Non-local Migrant Population	College Diploma	Commercial and Service Industry Personnel	2022-08-04	2022-08-04	2022-05-21	2023-02-25	10weeks5days	5	1	168.50			69	109	50.00			26	14	6-7	26-		No		No	No	No		No	No	No		Pregnancy with a history of multiple induced abortions,Twin pregnancy^ Monochorionic diamniotic (MCDA) twins		BMI＜18.5,Twin pregnancy, Various types of miscarriage ≥3	36	Good	2022-08-04
895			32			Shanxi Province	Non-local permanent residents	College Diploma	Office Personnel and Related Workers	2022-08-04	2022-08-04	2022-06-08	2023-03-15	8weeks1days	1	0	157.00			59	121	53.00			29		5-7	30-		No	No	No	No	No		No	No	No		Routine prenatal care		Normal	31	Good	2022-08-04
896			35				Shanghai	Other Situations	Unclassified Workers	2022-08-04	2022-08-04	2022-06-05	2023-03-12	8weeks4days	1	0	168.00			71	108	56.00			29	13	5-	30-	No		No						No	No		IVF pregnancy status		Assisted reproductive pregnancy	35	Good	2022-08-04
897			31			Heilongjiang Province	Non-local permanent residents	Postgraduate Education	Commercial and Service Industry Personnel	2022-08-04	2022-08-04	2022-06-01	2023-03-08	9weeks1days	1	0	155.00			63	105	52.00	Denial of Common Medical History	No	29	16	7-10	30-	0	No	0	No	No	My father passed away from esophageal cancer	0	No	No	No		Routine prenatal care		Normal	31	Good	2022-08-04
898			35			Jiangsu Province	Shanghai	Undergraduate degree	Office Personnel and Related Workers	2022-08-04	2022-08-04	2022-05-21	2023-02-25	10weeks5days	2	0	167.00			79	105	53.00			33	14	5-	37-	No		No				No		No	No		Routine prenatal care		Normal	30	Good	2022-08-04
899			35				Shanghai	Undergraduate degree	Unclassified Workers	2022-08-04	2022-08-04	2022-06-03	2023-03-10	8weeks6days	1	0	160.00			72	114	47.00	Denial of Common Medical History		33	12	7-	33-35								tanshinone片	No	No		Routine prenatal care		Normal	33	Good	2022-08-04
900			37			Shanghai	Shanghai	Undergraduate degree	Office Personnel and Related Workers	2022-08-04	2022-08-04	2022-06-09	2023-03-16	8weeks	2	0	161.00			66	113	65.00			34	14	3-4	30-	No		No				No		No	No		High-risk pregnancy careBMI＞24,Pregnancy Monitoring for Advanced Maternal Age Primiparous Women		Age≥35,BMI≥24	36	Good	2022-08-04
901			35			Shanghai	Shanghai	Undergraduate degree	Office Personnel and Related Workers	2022-08-04	2022-08-04	2022-06-14	2023-03-21	7weeks2days	2	1	170.00			62	104	70.00			24	13	5-	28-							No		No	No				BMI≥24,Endocrine system diseases	33	Good	2022-08-04
902			38			Zhejiang Province	Shanghai	Undergraduate degree	Office Personnel and Related Workers	2022-08-05	2022-08-05	2022-05-13	2023-02-17	12weeks	1	0	166.50			80	144	68.70			30	15	6-	30-	No		No				No		No	No		Pregnancy Monitoring for Advanced Maternal Age Primiparous Women		Age≥35	41	Good	2022-08-05
903			27			Anhui Province	Non-local permanent residents	Undergraduate degree	Office Personnel and Related Workers	2022-08-05	2022-08-05	2022-05-28	2023-03-04	9weeks6days	1	0	168.00			64	104	53.00			22	16	5-6	35-	No		No				No		No	No		Routine prenatal care		Normal	29	Good	2022-08-05
904			41			Shanghai	Shanghai	Postgraduate Education	Office Personnel and Related Workers	2022-08-05	2022-08-05	2022-06-02	2023-03-09	9weeks1days	1	0	165.00			78	124	55.00	Denial of Common Medical History	Elevit	39	14	5-7	30-	No		0	No	No	No	0	Unclear	No	No				Age≥40	47	Good	2022-08-05
905			36			Henan Province	Non-local permanent residents	College Diploma	Office Personnel and Related Workers	2022-08-05	2022-08-05	2022-05-08	2023-02-12	12weeks5days	2	1	160.00			59	116	66.00	Denial of Common Medical History		28	12	5-6	28-	No		No				No		No	No		Pregnancy Monitoring for Advanced Maternal Age Multiparous Women,Scarred uterus, History of cesarean section ,High-risk pregnancy careBMI＞24, Uterine diverticulum		Age≥35,BMI≥24,Scarred uterus,2|4|Other Situations Yellow alert classification ;Assessment Other Situations:子宫憩室	34	Good	2022-08-05
906			27			Shandong Province	Non-local permanent residents	College Diploma	Unclassified Workers	2022-08-05	2022-08-05	2022-05-16	2023-02-20	11weeks4days	2	0	164.00			76	120	51.00	Denial of Common Medical History	Dydrogesterone Tablets	26	16	7-	21-	No		No				No		No	No		High-risk pregnancy careBMI＜18.5,Pregnancy complicated byHPV infection, Low-grade squamous intraepithelial lesion (LSIL),Vulvar low-grade squamous intraepithelial lesion		BMI＜18.5	45	Good	2022-08-05
907			32			Shanghai	Shanghai	Undergraduate degree	Office Personnel and Related Workers	2022-08-05	2022-08-05	2022-06-05	2023-03-12	8weeks5days	2	0	174.00			69	117	70.00			27	12	5-6	29-30	No			No	No	No	No		No	No		High-risk pregnancy careAntinuclear antibody positive		Normal	31	Good	2022-08-05
908			30			Jiangsu Province	Non-local permanent residents	Undergraduate degree	Office Personnel and Related Workers	2022-08-05	2022-08-05	2022-05-13	2023-02-17	12weeks	1	0	162.50			71	114	67.00	Denial of Common Medical History		25	15	6-	34-	No		No				No		No	No		High-risk pregnancy careBMI＞24,Scarred uterus Post-myomectomy		BMI≥24,Scarred uterus,Prior pelvic surgery	27	Good	2022-08-05
909			34			Anhui Province	Non-local permanent residents	Postgraduate Education	Skilled Professionals	2022-08-05	2022-08-05	2022-06-08	2023-03-15	8weeks2days			159.00			63	99	58.00	Denial of Common Medical History		28	14	7-	30-	No		No				No		No	No		Routine prenatal care		Normal	33	Good	2022-08-05
910			41			Inner Mongolia Autonomous Region	Non-local permanent residents	College Diploma	Unclassified Workers	2022-08-05	2022-08-05	2022-06-18	2023-03-25	6weeks6days	2	0	167.50			59	103	60.00		No	39	15	5-	28-	No		No				No		No	No		Pregnancy Monitoring for Advanced Maternal Age Primiparous Women		Age≥40	37	Good	2022-08-05
911			34			Shanghai	Shanghai	Postgraduate Education	Office Personnel and Related Workers	2022-08-05	2022-08-05	2022-05-21	2023-02-25	10weeks6days	1	0	166.00			72	107	55.50			28	14	7-	31-	No						No		No	No		IVF pregnancy status		Assisted reproductive pregnancy	36	Good	2022-08-05
912			35			Jiangxi Province	Non-local permanent residents	College Diploma	Office Personnel and Related Workers	2022-08-05	2022-08-05	2022-05-15	2023-02-19	11weeks5days	1	0	161.00			72	102	49.00			33	18	5-7	28-30	No		No				No		No	No		High-risk pregnancy care,|History of hyperthyroidism		Thyroid disease that does not require medication	32	Good	2022-08-05
913			36			Guizhou Province	Shanghai	Undergraduate degree	Office Personnel and Related Workers	2022-08-05	2022-08-05	2022-06-04	2023-03-11	8weeks6days	2	1	162.00			67	113	50.00	Denial of Common Medical History	Levothyroxine	23	16	10-15	30-	No		No				No		No	No		Pregnancy Monitoring for Advanced Maternal Age Multiparous Women,Scarred uterus One cesarean section		Age≥35,Scarred uterus	41	Good	2022-08-05
914			37			Hubei Province	Non-local permanent residents	College Diploma	Office Personnel and Related Workers	2022-08-05	2022-08-05	2022-05-22	2023-02-26	10weeks5days	3	1	175.00			69	110	62.00			26	14	6-7	30-			No				No		No	No		High-risk pregnancy care,Pregnancy Monitoring for Advanced Maternal Age Multiparous Women		Age≥35	36	Good	2022-08-05
915			35			Anhui Province	Non-local permanent residents	Undergraduate degree	Unclassified Workers	2022-08-05	2022-08-05	2022-05-16	2023-02-20	11weeks4days	1	0	159.50			80	123	57.00			32	13	10-15	-	No			No	No	No	No		No	No		Pregnancy complicated by^Uterine Leiomyomas,Severe anemia		Uterine Leiomyomas≥5cm, Severe anemia （Hb40-70g/L）	33	Good	2022-08-05
916			32			Shandong Province	Shanghai	Undergraduate degree	Office Personnel and Related Workers	2022-08-05	2022-08-05	2022-06-05	2023-03-12	8weeks5days	1	0	171.50			62	103	53.00	Denial of Common Medical History		29	14	10-15	30-	No		No				0	No	No	No		High-risk pregnancy care BMI＜18.5		BMI＜18.5	31	Good	2022-08-05
917			30			Shanxi Province	Non-local permanent residents	Postgraduate Education	Unclassified Workers	2022-08-05	2022-08-05	2022-05-24	2023-02-28	10weeks3days	1	0	173.50			73	126	51.00	Denial of Common Medical History	No	27	15	-	28-	0	No	0	No	No	No	0	No	No	No		High-risk pregnancy care BMI＜18.5		BMI＜18.5	28	Good	2022-08-05
918			37			Shanghai	Shanghai	Postgraduate Education	Unclassified Workers	2022-08-05	2022-08-05	2022-06-05	2023-03-12	8weeks5days	4	1	167.00			51	101	52.50	Denial of Common Medical History		30		4-	30-	0	Thyroid nodule	0	No	No		0		No	No		Pregnancy Monitoring for Advanced Maternal Age Multiparous Women		Age≥35	42	Good	2022-08-05
919			32				Shanghai	Postgraduate Education	Unclassified Workers	2022-08-05	2022-08-05	2022-06-02	2023-03-09	9weeks1days	1	0	156.00			74	117	50.00			23	12	7-	30-	No		No						No	No		Routine prenatal care		Normal		Good	2022-08-05
920			41			Shandong Province	Shanghai	Postgraduate Education	Unclassified Workers	2022-08-05	2022-08-05	2022-06-02	2023-03-09	9weeks1days	5	2	160.00			79	131	54.00	Denial of Common Medical History	Elevit	28	15	7-	35-	No		No				No		No	No		Scarred uterus 2 times. History of cesarean section ,Pregnancy Monitoring for Advanced Maternal Age Multiparous Women,Pregnancy supervision with history of intrauterine fetal deathPlacental abruption.		Scarred uterus,Adverse obstetric history,Age≥40	40	Good	2022-08-05
921			25			Shanghai	Shanghai	College Diploma	Skilled Professionals	2022-08-05	2022-08-05	2022-05-09	2023-02-13	12weeks4days	1	0	166.50			84	131	65.00	Denial of Common Medical History		24	14	7-	35-	No		No				No		No	No		Routine prenatal care		Normal	25	Good	2022-08-05
922			39			Sichuan Province	Non-local permanent residents	Undergraduate degree	Skilled Professionals	2022-08-05	2022-08-05	2022-05-15	2023-02-19	11weeks5days	3	1	153.00			75	120	56.50	Denial of Common Medical History	No	26	14	7-	30-	No		No				No		No	No		Scarred uterus, History of cesarean section ,Pregnancy Monitoring for Advanced Maternal Age Multiparous Women		Age≥35,BMI≥24,Scarred uterus	40	Good	2022-08-05
923			36			Liaoning Province	Shanghai	Postgraduate Education	Skilled Professionals	2022-08-05	2022-08-05	2022-05-23	2023-02-27	10weeks4days	2	1	157.50			61	106	64.00			35	14	6-7	28-		Gestational diabetes		No	No	No		No	No	No		Gestational diabetes,Pregnancy Monitoring for Advanced Maternal Age Multiparous Women		Age≥35,BMI≥24,Diabetes without medication	35	Good	2022-08-05
924			35			Shanghai	Shanghai	College Diploma	Unclassified Workers	2022-08-05	2022-08-05	2022-06-22	2023-03-29	6weeks2days	5	1	167.00			66	107	76.00			25	15	5-	33-	No						No		No	No				BMI≥24, Various types of miscarriage ≥3	33	Good	2022-08-05
925			29			Jiangxi Province	Non-local permanent residents	Senior Secondary Education	Commercial and Service Industry Personnel	2022-08-05	2022-08-05	2022-06-01	2023-03-08	9weeks2days	4	1	163.00			71	109	60.00	Denial of Common Medical History		21	12	6-	30-	No		No				No		Alcohol	No		Routine prenatal care,Uterine Leiomyomas		Normal	32	Good	2022-08-05
926			40			Anhui Province	Non-local permanent residents	Vocational Secondary Education	Unclassified Workers	2022-08-05	2022-08-05	2022-05-22	2023-02-26	10weeks5days	4	1	160.00			81	134	46.00			26	15	5-7	28-	No		No				No		No	No		High-risk pregnancy care,Pregnancy Monitoring for Advanced Maternal Age Multiparous Women,Scarred uterus		Age≥35,BMI＜18.5,Scarred uterus			2022-08-05
927			31			Anhui Province	Non-local permanent residents	Undergraduate degree	Office Personnel and Related Workers	2022-08-05	2022-08-05	2022-06-10	2023-03-17	8weeks	3	0	163.50			58	105	59.00			27	12	6-	30-		No		No	No			No	No	No		Routine prenatal care		Normal	32	Good	2022-08-05
928			35			Sichuan Province	Shanghai	Postgraduate Education	Office Personnel and Related Workers	2022-08-06	2022-08-06	2022-06-11	2023-03-18	8weeks	3	1	162.00			60	96	54.00	Denial of Common Medical History	No	28	12	5-	28-	No		No	No	No		No		smooking	No		Routine prenatal care,Cervical neoplasms		Normal	36	Good	2022-08-06
929			29			Anhui Province	Non-local permanent residents	Undergraduate degree	Office Personnel and Related Workers	2022-08-06	2022-08-06	2022-05-22	2023-02-26	10weeks6days	1	0	164.50			57	103	52.00	Denial of Common Medical History	No	25	13	6-7	31-	Endocrine system diseases	Flat warts	No		My father has flat warts		No		Other Situations	No		Routine prenatal care		Normal	27	Good	2022-08-06
930			33			Sichuan Province	Non-local permanent residents	Undergraduate degree	Office Personnel and Related Workers	2022-08-06	2022-08-06	2022-05-27	2023-03-03	10weeks1days	1	0	155.00			53	97	51.00	Denial of Common Medical History	No	31	13	5-7	32-	No		No	No	No		0		No	No		Routine prenatal care		Normal	28	Good	2022-08-06
931			35			Anhui Province	Non-local permanent residents	Postgraduate Education	Office Personnel and Related Workers	2022-08-06	2022-08-06	2022-05-29	2023-03-05	9weeks6days	2	0	157.50			76	123	45.00	Denial of Common Medical History	No	30	13	5-6	28-	No		0	No	No	No	No		No	0		Pregnancy supervision with a history of ectopic pregnancy,High-risk pregnancy care：BMI＜18.5		BMI＜18.5	32	Good	2022-08-06
932			34			Jiangsu Province	Shanghai	College Diploma	Office Personnel and Related Workers	2022-08-06	2022-08-06	2022-05-12	2023-02-16	12weeks2days	2	1	152.00			73	115	47.00			25	12	7-	30-	No			No	No		No		No	No				Normal	31	Good	2022-08-06
933			39			Shanghai	Shanghai	Undergraduate degree	Office Personnel and Related Workers	2022-08-06	2022-08-06	2022-06-06	2023-03-13	8weeks5days	3	1	167.50			54	101	66.00	Denial of Common Medical History	No	25	17	7-	28-	No		No				No		Other Situations	No		Pregnancy Monitoring for Advanced Maternal Age Multiparous Women^Cervical ASCUS ,Scarred uterus^History of cesarean section in the previous pregnancy,Pregnancy with ovarian cyst^ Teratoma possible		Age≥35,Scarred uterus,2|4|Other Situations Yellow alert classification ;Assessment Other Situations:Cervix ASCUS	45	Good	2022-08-06
934			26			Gansu Province	Non-local permanent residents	College Diploma	Office Personnel and Related Workers	2022-08-06	2022-08-06	2022-06-03	2023-03-10	9weeks1days	2	1	167.00			62	106	58.00			22	13	7-	28-	No		No				No		No	No		Routine prenatal care		Normal	25	Good	2022-08-06
935			34			Zhejiang Province	Shanghai	Undergraduate degree	Office Personnel and Related Workers	2022-08-06	2022-08-06	2022-06-06	2023-03-13	8weeks5days	4	0	164.00			67	115	52.00			26	10	7-	31-	No		No				No		No	No		Cervical neoplasms,Pregnancy supervision with a history of ectopic pregnancy,High-risk pregnancy care,Pregnancy surveillance in women with a history of molar pregnancy		Prior pelvic surgery,Adverse obstetric history	33	Good	2022-08-06
936			32			Jiangsu Province	Shanghai	Postgraduate Education	Skilled Professionals	2022-08-06	2022-08-06	2022-05-10	2023-02-14	12weeks4days	2	1	165.00			64	91	55.00	Denial of Common Medical History	No,	28	14	5-7	28-	No		No				No		Alcohol	0				Normal	28	Good	2022-08-06
937			29			Zhejiang Province	Shanghai	Postgraduate Education	Office Personnel and Related Workers	2022-08-06	2022-08-06	2022-06-17	2023-03-24	7weeks1days			168.00			63	113	62.00	Denial of Common Medical History		28	13	5-	28-	No		No	No	No		No		No	No				Normal	35	Good	2022-08-06
938			32			Chongqing municipality	Non-local permanent residents	Undergraduate degree	Office Personnel and Related Workers	2022-08-06	2022-08-06	2022-06-05	2023-03-12	8weeks6days	1	0	162.50			60	114	57.50	Denial of Common Medical History		28	15	5-7	30-35	0	History of myocarditis	No				No		No	No		Routine prenatal care		Normal	31	Good	2022-08-06
939			32			Shanghai	Shanghai	Undergraduate degree	Unclassified Workers	2022-08-06	2022-08-06	2022-06-10	2023-03-17	8weeks1days	1	0	165.00			77	120	75.00	Denial of Common Medical History	Dydrogesterone Tablets，Metformin hydrochloride	26	14	5-	28-	0	Endometrial atypical hyperplasia，PCOS	0	No	No	No	No		No	No		High-risk pregnancy care, BMI＞24,PCOS		BMI≥24,Endocrine system diseases,2|4|Other Situations Yellow alert classification ;Assessment Other Situations:History of multiple hysteroscopic surgeries, history of atypical endometrial hyperplasia and complex hyperplasia.	31	Good	2022-08-06
940			31			Anhui Province	Non-local Migrant Population	Undergraduate degree	Office Personnel and Related Workers	2022-08-06	2022-08-06	2022-06-04	2023-03-11	9weeks	4	0	168.50			62	108	53.00	Denial of Common Medical History	Consolidate Kidney and Stabilize Fetus Pills、Progesterone、Folic acid	29	15	7-	32-	No		No	No	No		0	Moxifloxacin hydrochloride	No	No		Routine prenatal care		Normal	29	Good	2022-08-06
941			34			Henan Province	Non-local permanent residents	Postgraduate Education	Office Personnel and Related Workers	2022-08-06	2022-08-06	2022-06-08	2023-03-15	8weeks3days	1	0	175.50			71	122	62.00	Denial of Common Medical History	Antiabortifacient	31	12	7-	32-	No		No				No		No	No		Routine prenatal care		Normal	30	Good	2022-08-06
942			31			Shanxi Province	Shanghai	Postgraduate Education	Office Personnel and Related Workers	2022-08-06	2022-08-06	2022-06-01	2023-03-08	9weeks3days	2	0	163.00			65	105	62.00	Denial of Common Medical History	Dydrogesterone Tablets	28	14	5-	31-	No		Family history of hypertension Serious genetic diseases （Genetic hyperlipidemia）0/Other Situations0mmHg	No	No		No		Radiation	No		Routine prenatal care		Normal	29	Good	2022-08-06
943			34				Non-local permanent residents	College Diploma	Unclassified Workers	2022-08-06	2022-08-06	2022-06-30	2023-04-06	5weeks2days	2	1	170.00			63	104	79.00			26	12	7-	30-	No		No				No		No	No				BMI≥24	36		2022-08-06
944			33			Jiangsu Province	Shanghai	Postgraduate Education	Office Personnel and Related Workers	2022-08-06	2022-08-06	2022-06-15	2023-03-22	7weeks3days			156.00			69	112	52.00	Denial of Common Medical History	Progesterone(shot)、Folic acid	31	14	7-	31-	0	No	0	with Hypertension	with hypertension	No	0	No	No	No				Normal	32	Good	2022-08-06
945			35			Shanghai	Shanghai	Undergraduate degree	Office Personnel and Related Workers	2022-08-06	2022-08-06	2022-05-31	2023-03-07	9weeks4days	1	0	165.00			75	114	50.00			33	13	7-	29-	No		No	No	No		No		No	No		High-risk pregnancy care：BMI＜18.5		BMI＜18.5	35	Good	2022-08-06
946			30			Hebei Province	Non-local permanent residents	Postgraduate Education	Unclassified Workers	2022-08-06	2022-08-06	2022-05-14	2023-02-18	12weeks	1	0	168.50			76	116	64.00	Denial of Common Medical History	No	26	12	7-	28-90	No		0	No	No		0		No	No		Routine prenatal care		Normal	28	Good	2022-08-06
947			29			Chongqing municipality	Shanghai	Postgraduate Education	Office Personnel and Related Workers	2022-08-06	2022-08-06	2022-06-07	2023-03-14	8weeks4days	1	0	173.50			62	107	51.00			26	14	7-	34-	No				No		No		No	No		High-risk pregnancy care：BMI＜18.5		BMI＜18.5	32	Good	2022-08-06
948			31			Tianjin Municipality	Shanghai	Postgraduate Education	Office Personnel and Related Workers	2022-08-06	2022-08-06	2022-06-05	2023-03-12	8weeks6days	1	0	165.00			70	107	45.00			28		7-	27-	No		No				No		No	No		High-risk pregnancy care：BMI＜18.5		BMI＜18.5	28	Good	2022-08-06
949			28			Jiangsu Province	Non-local Migrant Population	College Diploma	Unclassified Workers	2022-08-06	2022-08-06	2022-06-01	2023-03-08	9weeks3days	1	0	157.00			64	126	52.00	Denial of Common Medical History	Levothyroxine	26	16	5-7	35-	No		Serious genetic disease (hemophilia)	No	No	No	No		Other Situations	No		High-risk pregnancy care, subclinical Hypothyroidism		Uncomplicated hypothyroidism requiring medication	31	Good	2022-08-06
950			36			Jiangsu Province	Non-local permanent residents	Undergraduate degree	Office Personnel and Related Workers	2022-08-06	2022-08-06	2022-06-03	2023-03-10	9weeks1days	1	0	171.50			53	100	60.00	Infectious hepatitis	Vemlidy tenofovir alafenamide fumarate	31	15	5-	30-	No		No				No		No	No		Pregnancy Monitoring for Advanced Maternal Age Primiparous Women,Hepatitis B surface antigen carriers		Age≥35,Prior pelvic surgery,Hepatitis B virus surface antigen positive and liver function Normal	35	Good	2022-08-06
951			33			Jiangsu Province	Non-local permanent residents	Postgraduate Education	Office Personnel and Related Workers	2022-08-06	2022-08-06	2022-06-09	2023-03-16	8weeks2days			165.00			57	103	58.00	Denial of Common Medical History	No	32	13	7-8	28-35	No		No	No	No		0		No	No				Normal	29	Good	2022-08-06
952			31			Jiangsu Province	Shanghai	Postgraduate Education	Skilled Professionals	2022-08-06	2022-08-06	2022-06-02	2023-03-09	9weeks2days	1	0	160.00			73	115	47.00	Denial of Common Medical History	Dydrogesterone Tablets	28	14	5-	28-	No		0	No	No	No	No		No	No		High-risk pregnancy care^BMI＜18.5		BMI＜18.5	32	Good	2022-08-06
953			37			Ningxia Hui Autonomous Region	Shanghai	Postgraduate Education	Operational Staff and Associated Individuals	2022-08-06	2022-08-06	2022-05-26	2023-03-02	10weeks2days	1	0	160.00			69	114	55.00			29	12	5-	30-	No		No				No		No	No		Pregnancy Monitoring for Advanced Maternal Age Primiparous Women		Age≥35	42	Good	2022-08-06
954			25			Shanghai	Shanghai	College Diploma	Skilled Professionals	2022-08-06	2022-08-06	2022-05-05	2023-02-09	13weeks2days	1	0	159.50			67	103	42.00	Denial of Common Medical History	No	21	15	7-	25-30	No		No	No	No		No		No	No		High-risk pregnancy care：BMI＜18.5		BMI＜18.5	27	Good	2022-08-06
955			29			Henan Province	Non-local permanent residents	Undergraduate degree	Unclassified Workers	2022-08-06	2022-08-06	2022-06-10	2023-03-17	8weeks1days	1	0	160.00			70	106	48.00	Denial of Common Medical History	No	27	14	5-7	30-	0	No	0	No	No		0	No	No	No				Normal	27	Good	2022-08-06
956			30				Non-local Migrant Population	Other Situations		2022-08-06	2022-08-06	2022-05-28	2023-03-04	10weeks	1	0	173.00			59	100	79.00	Denial of Common Medical History		26	14	6-	28-29	No		0	No			No		No	No				BMI≥24,Twin pregnancy			2022-08-06
957			31			Shandong Province	Shanghai	Postgraduate Education	Office Personnel and Related Workers	2022-08-06	2022-08-06	2022-05-24	2023-02-28	10weeks4days			160.00			86	124	53.00	Denial of Common Medical History	Progesterone，Progesterone capsule ，Consolidate Kidney and Stabilize Fetus Pills	27	14	7-	30-35	0	No	0	No	No		No		No	No				Normal	32	Good	2022-08-06
958			36			Jiangsu Province	Shanghai	Postgraduate Education	Office Personnel and Related Workers	2022-08-06	2022-08-06	2022-06-02	2023-03-09	9weeks2days			166.00			72	114	59.00	Denial of Common Medical History	Dydrogesterone Tablets Estradiol Valerate Tablets Chinese herbal supplement for pregnancy support,	30	13	5-	26-	No		No				No		No	No				Assisted reproductive pregnancy	41	Good	2022-08-06
959			42			Zhejiang Province	Shanghai	Undergraduate degree	Skilled Professionals	2022-08-08	2022-08-08	2022-06-02	2023-03-09	9weeks4days	2	1	171.50			82	149	69.00			24	15	15-30	30-	No			No	No	No		No	No	No		Pregnancy Monitoring for Advanced Maternal Age Multiparous Women		Age≥40	41	Good	2022-08-08
960			30			Shanghai	Shanghai	Postgraduate Education	Office Personnel and Related Workers	2022-08-08	2022-08-08	2022-06-08	2023-03-15	8weeks5days	1	0	165.00			66	100	60.00	Denial of Common Medical History	Antiabortifacient	26	13	10-15	30-	0	PCOS was diagnosed in 2020, and no treatment was given. Bilateral tubal obstruction was found in 2020. Hashimoto's thyroiditis was diagnosed in 2018, and Euthyrox is prescribed at a dosage of 2 tablets daily.	0	No	No	No	No		No	No		High-risk pregnancy care,Pregnancy complicated by Premature ventricular contractions,Hashimoto's thyroiditis, IVF pregnancy status: after reduction from triplets to twins.		Twin pregnancy,Uncomplicated hypothyroidism requiring medication,Assisted reproductive pregnancy	27	Good	2022-08-08
961			35			310100000000	Shanghai	Undergraduate degree	Office Personnel and Related Workers	2022-08-08	2022-08-08	2022-05-26	2023-03-02	10weeks4days	2	1	165.00			67	115	51.00	Denial of Common Medical History	No	24	13	5-7	28-30	No		No	No	No		No		No	No				Normal	35	Good	2022-08-08
962			34			Shandong Province	Shanghai	Postgraduate Education	Skilled Professionals	2022-08-08	2022-08-08	2022-06-17	2023-03-24	7weeks3days	2	1	159.50			70	111	60.00	Denial of Common Medical History	No	25	14	10-15	30-	No		0	No	No	No	0		No	No		High-risk pregnancy care： Preeclampsia in the previous pregnancy ,Scarred uterus		Scarred uterus	35	Good	2022-08-08
963			33			329900000000	Shanghai	College Diploma	Office Personnel and Related Workers	2022-08-08	2022-08-08	2022-06-03	2023-03-10	9weeks3days	1	0	166.50			79	121	65.00			31	14	5-	30-	No		No				No		No	No		Cervical neoplasms,Routine prenatal care		Normal	34	Good	2022-08-08
964			29			Jiangxi Province	Non-local permanent residents	Undergraduate degree	Unclassified Workers	2022-08-08	2022-08-08	2022-06-08	2023-03-15	8weeks5days	3	1	160.00			66	105	53.50	Denial of Common Medical History	No	25	13	-	30-40	No		0	No	No	No	0	No	No	No		High-risk pregnancy care,Scarred uterusOne cesarean section		Scarred uterus	37	Good	2022-08-08
965			40			Hunan Province	Non-local permanent residents	College Diploma	Office Personnel and Related Workers	2022-08-08	2022-08-08	2022-06-08	2023-03-15	8weeks5days	3	1	162.00			60	109	56.00	Denial of Common Medical History	ZiShenYuTaiWan Dydrogesterone Tablets	26	14	7-10	28-	No		No				0		No	No				Age≥35,Scarred uterus			2022-08-08
966			31			Shanghai	Shanghai	Undergraduate degree	Office Personnel and Related Workers	2022-08-08	2022-08-08	2022-06-07	2023-03-14	8weeks6days	1	0	167.00			81	111	51.00	Denial of Common Medical History	ZiShenYuTaiWan 、Allylestrenol tablets	26	12	-	28-	0	Hashimoto's thyroiditis was diagnosed 2 years ago, with no medication treatment. On July 5, TSH was checked at our hospital: 5.75 IU/L, and Euthyrox 0.5 tablets bid was prescribed. Psoriasis was diagnosed over 20 years ago, with no medication treatment.	0	Aunt and uncle have malignant tumors of the stomach	No	No	0	Unclear	No	No		Pregnancy complicated by hypothyroidism, treated with medication, and complicated by bile reflux gastritis. High-risk pregnancy carebmi<18.5		BMI＜18.5,Uncomplicated hypothyroidism requiring medication	35	Good	2022-08-08
967			34				Non-local permanent residents	College Diploma	Office Personnel and Related Workers	2022-08-08	2022-08-08	2022-05-31	2023-03-07	9weeks6days	2	1	164.00			70	105	52.00			25	14	5-7	23-30	No		No				No		No	No				Normal	31	Good	2022-08-08
968			34			Shanghai	Shanghai	College Diploma	Commercial and Service Industry Personnel	2022-08-08	2022-08-08	2022-05-14	2023-02-18	12weeks2days	2	0	160.50			52	92	64.50			30	11	10-15	30-		Allergic asthma was diagnosed in 2017, and budesonide is inhaled every night, changed on June 20 to once every 2-4 days. Rhinitis was diagnosed in 2017, and inhaled mometasone is used once a week.		No	No		No		No	No		Pregnancy complicated by Allergic asthma ,Pregnancy supervision with a history of ectopic pregnancy		BMI≥24, Respiratory system diseases	34	Good	2022-08-08
969			27			Jiangsu Province	Shanghai	Undergraduate degree	Public Servants	2022-08-08	2022-08-08	2022-06-19	2023-03-26	7weeks1days	1	0	158.00			64	99	52.00	Denial of Common Medical History	No	25	14	5-7	28-30	No		No	No	No		No		No	No				Normal	28	Good	2022-08-08
970			33			Jiangxi Province	Non-local permanent residents	Vocational Secondary Education	Unclassified Workers	2022-08-08	2022-08-08	2022-04-08	2023-01-13	17weeks3days	4	2	158.00			71	113	76.90			26	14	3-5	28-	No		No				No		No	No				BMI≥28, History of various uterine surgeries （ C-S、 Cornual Pregnancy 、 Uterine Leiomyomas myomectomy）≥2			2022-08-08
971			32			Heilongjiang Province	Non-local permanent residents	Undergraduate degree	Office Personnel and Related Workers	2022-08-08	2022-08-08	2022-06-12	2023-03-19	8weeks1days	1	0	169.00			57	112	49.00			31	14	6-	28-30	No		No	No	No				No	No				BMI＜18.5	31	Good	2022-08-08
972			31			330200000000	Shanghai	Undergraduate degree	Office Personnel and Related Workers	2022-08-08	2022-08-08	2022-05-30	2023-03-06	10weeks	1	0	166.00			77	118	55.00	Denial of Common Medical History	No	28	12	7-	30-	0	In 2013, underwent surgery for an L1 compression fracture due to a car accident, and in 2014, the steel screws were removed.	No				No		No	No				Normal	32	Good	2022-08-08
973			32			340100000000	Non-local permanent residents	Undergraduate degree	Unclassified Workers	2022-08-08	2022-08-08	2022-05-29	2023-03-05	10weeks1days	2	1	165.00			66	115	60.00			25	12	6-	30-	No		No				No		No	No		High-risk pregnancy care,Scarred uterus		Scarred uterus	30	Good	2022-08-08
974			31			Hebei Province	Shanghai	Postgraduate Education	Office Personnel and Related Workers	2022-08-08	2022-08-08	2022-06-10	2023-03-17	8weeks3days	2	0	159.00			67	105	65.00			29	13	5-	29-	No		No				No		No	No		High-risk pregnancy careBMI≥24		BMI≥24	30	Good	2022-08-08
975			31			Guangxi Zhuang Autonomous Region	Shanghai	Postgraduate Education	Public Servants	2022-08-08	2022-08-08	2022-05-23	2023-02-27	11weeks	1	0	165.00			71	128	60.00			30	12	10-15	25-	No		No				No		No	No		Pregnancy complicated by hyperthyroidism		Thyroid disease that does not require medication	30	Good	2022-08-08
976			27			Gansu Province	Non-local permanent residents	Other Situations	Unclassified Workers	2022-08-08	2022-08-08	2022-06-16	2023-03-23	7weeks4days	2	0	154.00			70	115	50.00	Denial of Common Medical History	Various	26	13	3-5	23-27	0		No				0	No	No	No		High-risk pregnancy care,Pregnancy complicated by Systemic lupus erythematosus		Systemic lupus erythematosus with no clinical manifestations.	22	Good	2022-08-08
977			31			Shanghai	Shanghai	Undergraduate degree	Office Personnel and Related Workers	2022-08-08	2022-08-08	2022-06-02	2023-03-09	9weeks4days			164.00			69	111	45.00	Denial of Common Medical History	No	28	13	5-7	28-	0	No	0	No	No	No	0	No	No	No		High-risk pregnancy care		BMI＜18.5	36	Good	2022-08-08
978			39			Jiangxi Province	Non-local Migrant Population	Undergraduate degree	Office Personnel and Related Workers	2022-08-08	2022-08-08	2022-05-11	2023-02-15	12weeks5days	5	1	161.00			80	140	75.00			25	13	5-7	30-32	No						No		No	No		Pregnancy Monitoring for Advanced Maternal Age Multiparous Women^： Maternal chromosome: Robertsonian translocation Pregnancy with a history of spontaneous abortion		Age≥35,Adverse obstetric history,BMI≥28	40	Good	2022-08-08
979			34			329900000000	Shanghai	Postgraduate Education	Office Personnel and Related Workers	2022-08-08	2022-08-08	2022-06-05	2023-03-12	9weeks1days	1	0	164.00			64	113	55.00			30	14	5-7	30-	No		No				No		No	No		Multiple Uterine Leiomyomas		2|4|Other Situations Yellow alert classification ;Assessment Other Situations:Multiple Uterine Leiomyomas	27	Good	2022-08-08
980			34			Zhejiang Province	Shanghai	Undergraduate degree	Office Personnel and Related Workers	2022-08-08	2022-08-08	2022-05-18	2023-02-22	11weeks5days	2	0	161.00			78	123	53.00	Denial of Common Medical History	No	29	13	5-6	30-	No		No	No	No		No		No	No				Assisted reproductive pregnancy	33	Good	2022-08-08
981			30			Shanghai	Shanghai	Undergraduate degree	Office Personnel and Related Workers	2022-08-08	2022-08-08	2022-06-11	2023-03-18	8weeks2days	2	0	154.00			87	137	66.00	Denial of Common Medical History	No	2	16	6-	30-90	0	No	0	No	No		No		No	No		High-risk pregnancy care BMI≥24		BMI≥24	31	Good	2022-08-08
982			36				Shanghai	Postgraduate Education	Unclassified Workers	2022-08-09	2022-08-09	2022-06-10	2023-03-17	8weeks4days	2	1	160.00			66	114	49.00			29	13	7-	30-	No						No		No	No		High-risk pregnancy care,Pregnancy Monitoring for Advanced Maternal Age Multiparous Women,Scarred uterus,Ovarian cyst		Age≥35,Scarred uterus,Ovarian cyst≥5cm	33	Good	2022-08-09
983			30			Heilongjiang Province	Non-local permanent residents	Undergraduate degree	Office Personnel and Related Workers	2022-08-09	2022-08-09	2022-04-08	2023-01-13	17weeks4days	1	0	163.50			71	103	50.00			29	14	7-10	25-	No		No				No		No	No		High-risk pregnancy care for a patient with a history of left retinal detachment surgery, a previous twin pregnancy with one fetal demise, and a current threatened abortion.		2|4|Other Situations Yellow alert classification ;Assessment Other Situations:History of surgery for left retinal detachment	32	Good	2022-08-09
984			35			Anhui Province	Non-local Migrant Population	College Diploma	Office Personnel and Related Workers	2022-08-09	2022-08-09	2022-06-08	2023-03-15	8weeks6days	4	1	162.00			64	92	52.00	Denial of Common Medical History	Not clear	29	15	5-7	30-40	0	In July 2022, thyroiditis was diagnosed with TSH at 4.14 IU/ml, and FT3 and FT4 were normal. Shanghai Shuguang Hospital prescribed Euthyrox 0.25 tablets to be taken orally every day. On July 26, anemia was checked at Shanghai Shuguang Hospital, and oral sulfonylureas were prescribed.	0	No	No	No	0	No	No	No		thyroiditis, subclinical Pregnancy complicated by hypothyroidism,High-risk pregnancy care, mild anemia		Uncomplicated hypothyroidism requiring medication	33	Good	2022-08-09
985			39			330600000000	Shanghai	College Diploma	Unclassified Workers	2022-08-09	2022-08-09	2022-06-04	2023-03-11	9weeks3days	3	0	169.00			69	104	60.00			38	14	7-	37-	No			No	No	No		No	No	No		Pregnancy Monitoring for Advanced Maternal Age Primiparous Women,Uterine Leiomyomas		Age≥35	35	Good	2022-08-09
986			35			Shanghai	Shanghai	College Diploma	Unclassified Workers	2022-08-09	2022-08-09	2022-06-08	2023-03-15	8weeks6days	3	0	160.00			84	133	50.00			25	15	5-7	28-30	No		No				No		No	No		High-risk pregnancy care,Hypothyroidism,| Autoimmune disease		Adverse obstetric history,Uncomplicated hypothyroidism requiring medication	37	Good	2022-08-09
987			24			Guizhou Province	Non-local permanent residents	Vocational Secondary Education	Office Personnel and Related Workers	2022-08-09	2022-08-09	2022-06-18	2023-03-25	7weeks3days	2	0	163.00			63	108	64.00			23	12	4-5	28-	No		No				No		No	No		High-risk pregnancy care		BMI≥24	35	Good	2022-08-09
988			28			Yunnan Province	Non-local permanent residents	Undergraduate degree	Skilled Professionals	2022-08-09	2022-08-09	2022-06-05	2023-03-12	9weeks2days	1	0	161.50			66	98	47.00	Denial of Common Medical History	No	25	15	-	32-	No		0	No	No	No	0	No	No	No		High-risk pregnancy care^：BMI<18.5,right ^Ovarian cyst^ diameter＜5CM		BMI＜18.5	32	Good	2022-08-09
989			39			Jiangsu Province	Non-local Migrant Population	Undergraduate degree	Office Personnel and Related Workers	2022-08-09	2022-08-09	2022-05-28	2023-03-04	10weeks3days	6	1	169.00			69	107	70.00	Denial of Common Medical History	Antiabortifacient	25	14	-	30-	0	Hives (urticaria) was diagnosed in 2017, and medication treatment was given. There have been no episodes since 2020	0	No	No	No	0	Unclear	No	No		Pregnancy with a history of spontaneous abortion,Pregnancy Monitoring for Advanced Maternal Age Multiparous Women,Scarred uterus,High-risk pregnancy care^：BMI>24，Urticaria medical history ,History of multiple miscarriages,Adenomyosis^合并子宫 Adenomyosis possible		Age≥35,BMI≥24,Scarred uterus, Various types of miscarriage ≥3	32	Good	2022-08-09
990			35				Non-local permanent residents	Undergraduate degree	Unclassified Workers	2022-08-09	2022-08-09	2022-06-05	2023-03-12	9weeks2days	2	1	165.00			53	94	49.00			26	12	5-7	28-30	No		No				No		No	No		High-risk pregnancy care,IVF pregnancy status		BMI＜18.5,Prior pelvic surgery,Assisted reproductive pregnancy	37	Fair	2022-08-09
991			36			Zhejiang Province	Non-local permanent residents	Undergraduate degree	Office Personnel and Related Workers	2022-08-09	2022-08-09	2022-05-25	2023-03-01	10weeks6days	5	1	163.00			73	114	55.00			23	14	7-10	30-	No		No				No		No	No		High-risk pregnancy care,Pregnancy Monitoring for Advanced Maternal Age Multiparous Women,Scarred uterus,History of multiple miscarriages		Age≥35,Scarred uterus, Various types of miscarriage ≥3	40	Good	2022-08-09
992			31			Shanxi Province	Shanghai	Postgraduate Education	Skilled Professionals	2022-08-09	2022-08-09	2022-05-22	2023-02-26	11weeks2days	1	0	168.00			50	95	60.00			29	12	7-	35-	No			No	No	No	No		No	No		Routine prenatal care,Uterine Leiomyomas		Normal	32	Good	2022-08-09
993			32			Hebei Province	Non-local permanent residents	Postgraduate Education	Skilled Professionals	2022-08-09	2022-08-09	2022-06-04	2023-03-11	9weeks3days	1	0	160.50			58	98	58.00	Denial of Common Medical History	Combined Vitamin，Caltrate，Folic acid	29	15	5-	37-	0	In December 2021, a right lobectomy was performed due to a thyroid nodule, and the postoperative pathology indicated papillary thyroid carcinoma. Postoperatively, Euthyrox 1.5 tablets are taken orally from Monday to Saturday and 2 tablets on Sunday, along with 1 calcium supplement taken orally	0				No		No	No		History of thyroid cancer,Hypothyroidism,High-risk pregnancy care		Uncomplicated hypothyroidism requiring medication,3|4|Other Situations Orange Warning Classification ;Assessment Other Situations:Postoperative Thyroid Cancer	35	Good	2022-08-09
994			36			310100000000	Shanghai	Undergraduate degree	Office Personnel and Related Workers	2022-08-09	2022-08-09	2022-05-23	2023-02-27	11weeks1days	1	0	160.00			66	126	70.00			28	14	5-6	30-	No		No				No		No	No		High-risk pregnancy care^：BMI>24，Antiphospholipid Syndrome, APS^Pregnancy Monitoring for Advanced Maternal Age Primiparous Women,Pregnancy Monitoring for Advanced Maternal Age Primiparous Women^Uterine Leiomyomas		Age≥35,BMI≥24,2|4|Other Situations Yellow alert classification ;Assessment Other Situations:Positive antiphospholipid antibodies +	34	Good	2022-08-09
995			27			Heilongjiang Province	Non-local permanent residents	Undergraduate degree	Office Personnel and Related Workers	2022-08-09	2022-08-09	2022-06-12	2023-03-19	8weeks2days	1	0	162.00			70	110	53.00			25		10-15	40-		PCOS was diagnosed in December 2021, and Diane-35 was prescribed orally, which was stopped after 3 months. This time, there was a natural pregnancy.		No	No	No	No		No	No		High-risk pregnancy care,PCOS		that do not require medication Other SituationsEndocrine system diseases	26	Good	2022-08-09
996			30				Non-local permanent residents	College Diploma	Unclassified Workers	2022-08-09	2022-08-09	2022-05-03	2023-02-07	14weeks			163.00			84	133	100.00			23	14	7-	60-	No		No				No		No	No		High-risk pregnancy care,Obesity		BMI≥28			2022-08-09
997			39			Zhejiang Province	Shanghai	Postgraduate Education	Office Personnel and Related Workers	2022-08-09	2022-08-09	2022-06-02	2023-03-09	9weeks5days	4	1	153.00			69	124	65.00			31	15	-	30-	No		No				No		No	No		Pregnancy Monitoring for Advanced Maternal Age Multiparous Women,High-risk pregnancy careBMI＞24		Age≥35,BMI≥24	36	Fair	2022-08-09
998			30				Shanghai	Undergraduate degree	Unclassified Workers	2022-08-09	2022-08-09	2022-05-25	2023-03-01	10weeks6days			163.00			62	106	55.00			28	14	9-	31-	No		No				No		No	No		Routine prenatal care		Normal	33	Good	2022-08-09
999			34			370400000000	Non-local permanent residents	Undergraduate degree	Unclassified Workers	2022-08-09	2022-08-09	2022-05-26	2023-03-02	10weeks5days	1	0	163.50			71	124	62.50	Denial of Common Medical History	Claritin，Chinese herbal supplement for pregnancy support,	33	14	5-7	28-30	No		No				No		No	No		Routine prenatal care		Normal	39	Good	2022-08-09
1000			27			231200000000	Non-local permanent residents	Undergraduate degree	Skilled Professionals	2022-08-09	2022-08-09	2022-05-27	2023-03-03	10weeks4days	1	0	157.50			67	114	55.00	Denial of Common Medical History	No	26	13	5-	30-37	No		No	No	No		penicillin		Radiation	No		Routine prenatal care		Normal	28	Good	2022-08-09
1001			25			Shanxi Province	Non-local permanent residents	College Diploma	Office Personnel and Related Workers	2022-08-09	2022-08-09	2022-06-06	2023-03-13	9weeks1days	2	0	162.00			82	114	54.00			23	13	7-	30-	No						No		No	No		Routine prenatal care		Normal	28	Good	2022-08-09
1002			36			Shanghai	Non-local permanent residents	Undergraduate degree	Unclassified Workers	2022-08-09	2022-08-09	2022-06-14	2023-03-21	8weeks	2	1	160.00			55	103	51.00			28	13	5-7	28-	No						No		No	No		High-risk pregnancy care,Scarred uterus		Age≥35,Scarred uterus			2022-08-09
1003			40				Shanghai	Undergraduate degree	Unclassified Workers	2022-08-09	2022-08-09	2022-05-08	2023-02-12	13weeks2days	5	2	162.00			58	97	60.00			30	14	6-	28-	No		No				No		No	No		High-risk pregnancy care,Pregnancy Monitoring for Advanced Maternal Age Multiparous Women		Age≥35	42	Fair	2022-08-09
1004			34			Shanghai	Shanghai	Undergraduate degree	Unclassified Workers	2022-08-10	2022-08-10	2022-06-01	2023-03-08	10weeks	1	0	160.50			58	105	50.00		Levofloxacin hydrochloride capsule	30	12	5-6	28-	No		No				No		No	No		Routine prenatal care		Normal	37	Good	2022-08-10
1005			34			Shanghai	Shanghai	Undergraduate degree	Office Personnel and Related Workers	2022-08-10	2022-08-10	2022-05-28	2023-03-04	10weeks4days	1	0	167.00			71	102	51.00	Denial of Common Medical History	Dydrogesterone Tablets	32	14	6-7	25-26	No		No	No	No		No		No	No		High-risk pregnancy care：BMI＜18.5		BMI＜18.5	36	Good	2022-08-10
1006			29			Shanghai	Shanghai	Vocational Secondary Education	Office Personnel and Related Workers	2022-08-10	2022-08-10	2022-05-22	2023-02-26	11weeks3days	3	0	166.00			70	106	65.00	Denial of Common Medical History	Elevit，DHA	23	13	5-7	28-	No		No	No	No		0		No	No				Assisted reproductive pregnancy,Prior pelvic surgery	33	Good	2022-08-10
1007			31			Jiangsu Province	Shanghai	Undergraduate degree	Public Servants	2022-08-10	2022-08-10	2022-05-20	2023-02-24	11weeks5days	1	0	162.00			64	106	52.00			27	13	6-	28-30	No		No				No		No	No		Routine prenatal care		Normal	32	Good	2022-08-10
1008			36			Shanghai	Shanghai	Postgraduate Education	Office Personnel and Related Workers	2022-08-10	2022-08-10	2022-05-25	2023-03-01	11weeks	2	1	162.50			69	123	68.00			29	12	5-6	28-42		No		No	No	No			No	No		Pregnancy Monitoring for Advanced Maternal Age Multiparous Women,High-risk pregnancy care^：BMI≥24，Previous pregnancy with optic nerve atrophy syndrome.		Age≥35,BMI≥24,2|4|Other Situations Yellow alert classification ;Assessment Other Situations:Previous pregnancy 视神经萎缩综合征	34	Good	2022-08-10
1009			28			Shanghai	Shanghai	Undergraduate degree	Skilled Professionals	2022-08-10	2022-08-10	2022-06-12	2023-03-19	8weeks3days	2	1	162.50			63	103	52.00	Denial of Common Medical History	No	25	17	5-6	30-	0	Rh-negative blood; after the previous delivery, anti-D immunoglobulin was not administered. On August 29, 2019, antibody screening test showed: (anti-D antibody titer: 0)	0	No	No	No	0	No	No	No		High-risk pregnancy care：B-Rh negative		2|4|Other Situations Yellow alert classification ;Assessment Other Situations:RHnegative 血	30	Good	2022-08-10
1010			30			Hebei Province	Non-local permanent residents	Undergraduate degree	Office Personnel and Related Workers	2022-08-10	2022-08-10	2022-05-23	2023-02-27	11weeks2days	2	0	159.00			54	99	46.00			27	12	7-	28-42	No			No	No	No	No		No	No				BMI＜18.5	44	Good	2022-08-10
1011			33			Zhejiang Province	Shanghai	Undergraduate degree	Office Personnel and Related Workers	2022-08-10	2022-08-10	2022-06-03	2023-03-10	9weeks5days	1	0	163.00			70	112	63.00			3	14	5-7	26-28	No		No	No	No		No		No	No				Normal	39	Good	2022-08-10
1012			36			Shanghai	Shanghai	Undergraduate degree	Office Personnel and Related Workers	2022-08-10	2022-08-10	2022-06-10	2023-03-17	8weeks5days	1	0	163.00			66	113	55.00	Denial of Common Medical History		32	15	10-15	50-	0	Hemorrhoidectomy	0				No		No	No		Routine prenatal care		Normal	36	Good	2022-08-10
1013			32				Non-local permanent residents	Undergraduate degree	Unclassified Workers	2022-08-10	2022-08-10	2022-06-15	2023-03-22	8weeks			170.00			62	106	58.00			31	14	6-7	28-	No						No		No	No		High-risk pregnancy care,|After Tetralogy of Fallot repair.		Congenital heart disease: no residual cardiac structural abnormalities after repair of Tetralogy of Fallot.			2022-08-10
1014			25			Anhui Province	Non-local permanent residents	Senior Secondary Education	Office Personnel and Related Workers	2022-08-10	2022-08-10	2022-05-16	2023-02-20	12weeks2days	2	0	160.50			68	104	50.00	Denial of Common Medical History		24	15	7-	30-40	No		0	No	No	No	No		No	No		Cervical neoplasms,High-risk pregnancy care： Previous pregnancy with fetal trisomy 13.		2|1.7.7|Other SituationsAdverse obstetric history	36	Good	2022-08-10
1015			31			Anhui Province	Non-local Migrant Population	College Diploma	Office Personnel and Related Workers	2022-08-10	2022-08-10	2022-05-21	2023-02-25	11weeks4days	2	0	158.00			79	122	57.50			30	14	5-7	30-45							No		No	No				that do not require medication Other SituationsEndocrine system diseases	32	Good	2022-08-10
1016			33				Non-local permanent residents	Undergraduate degree	Unclassified Workers	2022-08-10	2022-08-10	2022-06-03	2023-03-10	9weeks5days	1	0	158.00			61	102	60.00			32	12	3-5	28-	No						No		No	No		Pregnancy complicated by anxiety		BMI≥24,, remission period of psychosis.	31	Good	2022-08-10
1017			30			310100000000	Shanghai	College Diploma	Office Personnel and Related Workers	2022-08-10	2022-08-10	2022-06-10	2023-03-17	8weeks5days	1	0	163.00			55	98	65.00			27	18	6-	28-	No						No		No	No		High-risk pregnancy care：BMI≥24,Uterine Leiomyomas		BMI≥24,2|4|Other Situations Yellow alert classification ;Assessment Other Situations: left wall Uterine Leiomyomas 42*37*37mm	34	Good	2022-08-10
1018			31			Heilongjiang Province	Non-local permanent residents	Undergraduate degree	Unclassified Workers	2022-08-10	2022-08-10	2022-06-17	2023-03-24	7weeks5days	2	0	159.00			76	123	60.00			26		5-7	30-	No		No				No		No	No		Pregnancy with a history of spontaneous abortion,High-risk pregnancy care,| Post-septal uterine surgery		2|4|Other Situations Yellow alert classification	30	Good	2022-08-10
1019			34			Henan Province	Non-local permanent residents	Postgraduate Education	Skilled Professionals	2022-08-10	2022-08-10	2022-06-01	2023-03-08	10weeks	1	0	162.50			51	99	55.00			31	13	4-5	28-30		In February 2022, a history of atrophic gastritis was diagnosed, and rabeprazole was taken orally until the end of April.		No	No			No	No	No		Pregnancy supervision for those with a history of miscarriage ,Atrophic gastritis		Digestive system disease	32	Good	2022-08-10
1020			37			Anhui Province	Shanghai	Postgraduate Education	Skilled Professionals	2022-08-10	2022-08-10	2022-05-23	2023-02-27	11weeks2days	2	1	164.00			71	114	55.00			26	15	7-	28-	No			No	No		No		No	No				Age≥35,Scarred uterus	36	Good	2022-08-10
1021			33			Shanghai	Shanghai	Undergraduate degree	Office Personnel and Related Workers	2022-08-10	2022-08-10	2022-06-01	2023-03-08	10weeks	1	0	167.00			70	106	56.00	Denial of Common Medical History	Dydrogesterone Tablets，Chinese herbal supplement for pregnancy support,	30	13	5-7	28-32								Chlortetracycline 、Gentamicin、Levofloxacin	No	No		IVF pregnancy status,Pregnancy complicated by thyroiditis		Assisted reproductive pregnancy,Thyroid disease that does not require medication	35	Good	2022-08-10
1022			31			Henan Province	Shanghai	Postgraduate Education	Skilled Professionals	2022-08-10	2022-08-10	2022-03-27	2023-01-01	19weeks3days	1	0	161.00			61	103	57.50			29	13	6-	28-32	No		No				No		No	No		subclinical Hyperthyroidism,Mycoplasma infection		Thyroid disease that does not require medication	32	Good	2022-08-10
1023			36			Heilongjiang Province	Non-local permanent residents	Postgraduate Education	Office Personnel and Related Workers	2022-08-10	2022-08-10	2022-05-12	2023-02-16	12weeks6days	2	1	171.00			57	99	62.50	Denial of Common Medical History	Chinese herbal supplement for pregnancy support,	27	13	5-	30-	No		No				No		No	No		Pregnancy Monitoring for Advanced Maternal Age Multiparous Women		Age≥35	36	Good	2022-08-10
1024			29			Fujian Province	Shanghai	College Diploma	Skilled Professionals	2022-08-10	2022-08-10	2022-05-29	2023-03-05	10weeks3days	2	0	165.00			62	97	70.00			26	14	6-7	28-		No	No	No	No		No		No	No				BMI≥24	25	Good	2022-08-10
1025			40				Non-local permanent residents	Other Situations		2022-08-10	2022-08-10	2022-05-20	2023-02-24	11weeks5days	2	1	158.00			77	132	60.00			27	12	5-7	25-30	No						No		No	No				Age≥35,BMI≥24,Scarred uterus	41		2022-08-10
1026			33			329900000000	Shanghai	Undergraduate degree	Office Personnel and Related Workers	2022-08-10	2022-08-10	2022-06-19	2023-03-26	7weeks3days	1	0	160.00			68	97	52.00	Denial of Common Medical History	No	25	12	7-	30-	0		0	No	No	No	No		No	No				Normal	34	Good	2022-08-10
1027			31			Shanghai	Shanghai	Undergraduate degree	Office Personnel and Related Workers	2022-08-10	2022-08-10	2022-06-20	2023-03-27	7weeks2days	2	0	166.00			63	113	90.00	Denial of Common Medical History	No	27	15	4-5	26-30	No		0	No	No	No	No		No	No		High-risk pregnancy care：BMI≥28,Pregnancy supervision for those with a history of miscarriage		BMI≥28	32	Good	2022-08-10
1028			37			Shandong Province	Shanghai	Undergraduate degree	Office Personnel and Related Workers	2022-08-11	2022-08-11	2022-06-06	2023-03-13	9weeks3days	2	0	159.00			62	102	48.50			35	14	5-	30-31	No		No				No		No	No		Pregnancy supervision with a history of ectopic pregnancy, thyroiditis,Pregnancy Monitoring for Advanced Maternal Age Primiparous Women		Age≥35,Thyroid disease that does not require medication,2|4|Other Situations Yellow alert classification ;Assessment Other Situations:Ectopic pregnancy 史	38	Good	2022-08-11
1029			33			Shanghai	Shanghai	College Diploma	Office Personnel and Related Workers	2022-08-11	2022-08-11	2022-06-11	2023-03-18	8weeks5days	1	0	167.50			63	117	55.00	Denial of Common Medical History	No	26	13	7-	30-	0	No	0	No	No		No		No	No		Routine prenatal care		Normal	36	Good	2022-08-11
1030			33			Shanghai	Shanghai	Undergraduate degree	Office Personnel and Related Workers	2022-08-11	2022-08-11	2022-06-03	2023-03-10	9weeks6days	1	0	169.00			73	120	55.00			27	14	7-	33-36	No			No	No	No			No	No		Routine prenatal care		Normal	32	Good	2022-08-11
1031			35			Henan Province	Non-local Migrant Population	Undergraduate degree	Skilled Professionals	2022-08-11	2022-08-11	2022-06-15	2023-03-22	8weeks1days	2	0	168.00			80	113	60.00			28	13	5-	28-	No						No		No	No		Routine prenatal care		Normal	31	Good	2022-08-11
1032			32			341600000000	Non-local permanent residents	Undergraduate degree	Commercial and Service Industry Personnel	2022-08-11	2022-08-11	2022-05-20	2023-02-24	11weeks6days	1	0	165.00			60	101	52.00			28	16	-	30-	No		No				No		No	No		PCOS		Normal	27	Good	2022-08-11
1033			36			Jiangsu Province	Non-local permanent residents	Undergraduate degree	Skilled Professionals	2022-08-11	2022-08-11	2022-06-04	2023-03-11	9weeks5days	1	0	163.50			70	112	52.00	Denial of Common Medical History	Fenofibrate	29	13	6-7	28-	No		No				No		No	No		IVF pregnancy status,Pregnancy Monitoring for Advanced Maternal Age Primiparous Women		Age≥35,Assisted reproductive pregnancy	32	Good	2022-08-11
1034			31			Shandong Province	Shanghai	Postgraduate Education	Office Personnel and Related Workers	2022-08-11	2022-08-11	2022-06-08	2023-03-15	9weeks1days	1	0	160.00			61	114	52.00			29	14	-	37-		History of cervical polyp and endometrial polyp surgery		No	No	grandfather hypertension			No	No		Routine prenatal care,Post-cervical neoplasm excision surgery,Post-endometrial polyp removal surgery		Normal	32	Good	2022-08-11
1035			40			Shanghai	Shanghai	Undergraduate degree	Office Personnel and Related Workers	2022-08-11	2022-08-11	2022-05-27	2023-03-03	10weeks6days	1	0	173.00			66	116	55.00	Denial of Common Medical History		36		5-	28-30	No		No				No		No	No		High-risk pregnancy careBMI<18.5,Pregnancy Monitoring for Advanced Maternal Age Primiparous Women		Age≥35,BMI＜18.5	38	Good	2022-08-11
1036			34			Hunan Province	Non-local Migrant Population	Undergraduate degree	Office Personnel and Related Workers	2022-08-11	2022-08-11	2022-06-07	2023-03-14	9weeks2days	1	0	159.00			61	107	49.00			30	13	4-5	22-	No		No	No	No		No		No	No				Normal	38	Good	2022-08-11
1037			32			Fujian Province	Non-local permanent residents	Undergraduate degree	Office Personnel and Related Workers	2022-08-11	2022-08-11	2022-05-21	2023-02-25	11weeks5days	1	0	161.00			58	108	60.00	Denial of Common Medical History	No	30	14	7-	36-43	No		No				No		No	No		Pregnancy complicated by Fungal vaginitis		Normal	36	Good	2022-08-11
1038			39			Fujian Province	Non-local permanent residents	Senior Secondary Education	Unclassified Workers	2022-08-11	2022-08-11	2022-06-08	2023-03-15	9weeks1days	4	0	160.00			54	105	65.00			28	15	3-7	35-40	No		No				No		No	No				Age≥35,BMI≥24,Prior pelvic surgery, Various types of miscarriage ≥3	39	Fair	2022-08-11
1039			30			Shanghai	Shanghai	Undergraduate degree	Skilled Professionals	2022-08-11	2022-08-11	2022-05-19	2023-02-23	12weeks	2	1	171.00			79	123	68.00			26	12	6-	28-	No		No				No		No	No		Ovarian tumors^：History of ovarian teratoma surgery,Routine prenatal care		Normal	29	Good	2022-08-11
1040			33			Shanghai	Shanghai	College Diploma	Office Personnel and Related Workers	2022-08-11	2022-08-11	2022-06-06	2023-03-13	9weeks3days	2	0	165.00			57	114	58.00	Denial of Common Medical History	Antiabortifacient	25	12	7-10	28-	No		No				No		No	No		PCOS,Routine prenatal care		Normal	33	Good	2022-08-11
1041			34			310100000000	Shanghai	Postgraduate Education	Skilled Professionals	2022-08-11	2022-08-11	2022-05-26	2023-03-02	11weeks	1	0	168.00			64	110	51.00			32	16	7-10	28-		After treatment for hyperthyroidism due to Hashimoto's thyroiditis, hypothyroidism was managed with Euthyrox, which has been discontinued for one month		No	No	No	No		No	No		High-risk pregnancy care：BMI＜18.5,Hashimoto's thyroiditis medical history		BMI＜18.5	34	Good	2022-08-11
1042			29			Shanghai	Shanghai	Postgraduate Education	Office Personnel and Related Workers	2022-08-11	2022-08-11	2022-06-04	2023-03-11	9weeks5days	1	0	163.00			79	126	57.50	Denial of Common Medical History	Dydrogesterone Tablets Elevit	24	12	5-	30-37	No		0	No	No	No	No		No	No		Routine prenatal care		Normal	28	Good	2022-08-11
1043			30			Jiangxi Province	Non-local permanent residents	Undergraduate degree	Office Personnel and Related Workers	2022-08-11	2022-08-11	2022-05-31	2023-03-07	10weeks2days	1	0	155.50			54	101	43.00	Denial of Common Medical History	No	28	18	4-	29-	0	No	0	No	No	No	0	No	No	No		High-risk pregnancy care:BMI<18.5		BMI＜18.5	28	Good	2022-08-11
1044			35			330300000000	Non-local permanent residents	Other Situations	Office Personnel and Related Workers	2022-08-11	2022-08-11	2022-05-29	2023-03-05	10weeks4days	1	0	155.00			63	107	42.00	Denial of Common Medical History		33	14	5-7	30-	No		No				No		No	No				BMI＜18.5	34	Good	2022-08-11
1045			33			Anhui Province	Non-local permanent residents	Undergraduate degree	Unclassified Workers	2022-08-11	2022-08-11	2022-06-03	2023-03-10	9weeks6days	1	0	156.00			63	103	50.00	Denial of Common Medical History	No	30	15	6-	28-	No		0	No	No	No	No		No	No		Routine prenatal care		Normal	31	Good	2022-08-11
1046			33			Gansu Province	Shanghai	Postgraduate Education	Unclassified Workers	2022-08-11	2022-08-11	2022-06-20	2023-03-27	7weeks3days	1	0	158.00			58	121	46.00	Denial of Common Medical History	No	27	14	4-	30-40	No		0	No	No	No	0	No	No	No		High-risk pregnancy care:BMI<18.5		BMI＜18.5	35	Good	2022-08-11
1047			32				Shanghai	Other Situations	Unclassified Workers	2022-08-11	2022-08-11	2022-06-11	2023-03-18	8weeks5days	1	0	162.00			69	108	52.00			30	14	5-7	30-45		Fibroid (discovered in July this year, approximately 2 cm in diameter).	No				No		No	No				Normal	33	Good	2022-08-11
1048			40			Shanghai	Shanghai	Undergraduate degree	Skilled Professionals	2022-08-12	2022-08-12	2022-06-03	2023-03-10	10weeks	3	1	156.00			79	126	58.00			30	12	4-5	28-	No						No		No	No		High-risk pregnancy care,Pregnancy Monitoring for Advanced Maternal Age Multiparous Women		Age≥35	41	Good	2022-08-12
1049			34			Shanghai	Shanghai	Other Situations	Skilled Professionals	2022-08-12	2022-08-12	2022-06-01	2023-03-08	10weeks2days	1	0	161.00			77	125	94.50			27	13	5-7	31-	No		No				No		No	No		High-risk pregnancy care,Obesity, thyroiditis		BMI≥28,Thyroid disease that does not require medication	35	Good	2022-08-12
1050			36				Shanghai	Postgraduate Education	Unclassified Workers	2022-08-12	2022-08-12	2022-06-07	2023-03-14	9weeks3days	2	1	162.00			60	100	50.00			28	14	6-7	30-	No		No				No		No	No		High-risk pregnancy care,Scarred uterus,Pregnancy Monitoring for Advanced Maternal Age Multiparous Women		Age≥35,Scarred uterus	35	Good	2022-08-12
1051			33			Anhui Province	Non-local Migrant Population	Other Situations	Office Personnel and Related Workers	2022-08-12	2022-08-12	2022-06-05	2023-03-12	9weeks5days	2	1	158.00			53	91	47.00			28	16	5-7	30-	No		No				No		No	No				Normal	34		2022-08-12
1052			30			Shanghai	Shanghai	Undergraduate degree	Skilled Professionals	2022-08-12	2022-08-12	2022-05-10	2023-02-14	13weeks3days	1	0	163.50			74	128	60.00	Denial of Common Medical History	Folic acid	26	13	6-	28-34	No		0	No	No	No	No		No	No		Routine prenatal care		Normal	32	Good	2022-08-12
1053			34			Zhejiang Province	Shanghai	Undergraduate degree	Skilled Professionals	2022-08-12	2022-08-12	2022-05-22	2023-02-26	11weeks5days	2	1	161.50			72	117	47.00			29	13	7-	28-	No		No				No		No	No		High-risk pregnancy care：BMI≤18.5		BMI＜18.5	31	Good	2022-08-12
1054			35			Jiangsu Province	Non-local permanent residents	Undergraduate degree	Unclassified Workers	2022-08-12	2022-08-12	2022-06-15	2023-03-22	8weeks2days	2	1	167.00			64	100	65.00			27	13	5-7	28-30	No						No		No	No		High-risk pregnancy care,Scarred uterusHistory of cesarean section in the previous pregnancy		Scarred uterus	35	Good	2022-08-12
1055			29			Shanghai	Shanghai	Postgraduate Education	Office Personnel and Related Workers	2022-08-12	2022-08-12	2022-05-15	2023-02-19	12weeks5days	1	0	161.00			80	112	48.00			27	12	5-7	28-30	No		No				No		No	No		High-risk pregnancy care,Hepatitis B surface antigen (HBsAg), hepatitis B e antigen (HBeAg), and anti-hepatitis B core antibody (anti-HBc) positive		Hepatitis B virus surface antigen positive and liver function Normal	28	Good	2022-08-12
1056			30			310100000000	Shanghai	Undergraduate degree	Office Personnel and Related Workers	2022-08-12	2022-08-12	2022-05-25	2023-03-01	11weeks2days	1	0	159.50			65	120	54.00	Denial of Common Medical History	No	27		7-	33-	0	No	0	No	No	No	No		No	No		Routine prenatal care		Normal	31	Good	2022-08-12
1057			31			Shanghai	Shanghai	Undergraduate degree	Office Personnel and Related Workers	2022-08-12	2022-08-12	2022-06-09	2023-03-16	9weeks1days	4	1	167.00			64	108	51.00			26	12	6-	28-34	No						No		No	No		Pregnancy with a history of spontaneous abortion,High-risk pregnancy care：BMI≤18.5, Cervical polyps		BMI＜18.5,2|4|Other Situations Yellow alert classification ;Assessment Other Situations:Cervix lesion	33	Good	2022-08-12
1058			39			Henan Province	Shanghai	Postgraduate Education	Skilled Professionals	2022-08-12	2022-08-12	2022-06-13	2023-03-20	8weeks4days	3	1	163.00			61	116	60.00	Denial of Common Medical History	No	29	13	3-4	35-	No		No				No		No	No		High-risk pregnancy care,Pregnancy Monitoring for Advanced Maternal Age Multiparous Women		Age≥35	37	Good	2022-08-12
1059			34			360300000000	Non-local permanent residents	Undergraduate degree	Unclassified Workers	2022-08-12	2022-08-12	2022-05-24	2023-02-28	11weeks3days	2	1	163.00			55	102	56.50			30	12	5-	28-	No		No				No		No	No		Pregnancy complicated byAtrial premature beats,Monitoring of pregnancy with a history of fetal malformation Previous pregnancy History of pregnancy termination at 28 weeks’ gestation due to fetal spina bifida.		Adverse obstetric history,2|4|Other Situations Yellow alert classification ;Assessment Other Situations:房性Premature beats	36	Good	2022-08-12
1060			30			429900000000	Non-local permanent residents	Postgraduate Education	Office Personnel and Related Workers	2022-08-12	2022-08-12	2022-06-03	2023-03-10	10weeks	1	0	158.50			82	125	67.00			27	12	5-	25-40	No			No	No	father with hepatitis B	No		No	No		High-risk pregnancy care^：BMI≥24, Cervical polyps		BMI≥24,2|4|Other Situations Yellow alert classification ;Assessment Other Situations:Cervical polyp	32	Fair	2022-08-12
1061			34			Jiangsu Province	Shanghai	Postgraduate Education	Unclassified Workers	2022-08-12	2022-08-12	2022-06-14	2023-03-21	8weeks3days	2	0	162.00			68	104	55.00			33	12	5-7	28-	No		No				No		No	No		Cervical neoplasms,Routine prenatal care		Normal	36	Good	2022-08-12
1062			30			Anhui Province	Non-local permanent residents	Postgraduate Education	Skilled Professionals	2022-08-12	2022-08-12	2022-04-15	2023-01-20	17weeks	1	0	162.50			75	130	55.00	Denial of Common Medical History	Antiabortifacient	28	13	6-7	30-	0	No	0	No	No	No	0	No	No	No		Routine prenatal care		Diabetes without medication	32	Good	2022-08-12
1063			33			Anhui Province	Shanghai	Postgraduate Education	Office Personnel and Related Workers	2022-08-12	2022-08-12	2022-06-23	2023-03-30	7weeks1days	1	0	167.00			71	119	54.50	Denial of Common Medical History	Elevit	32	12	4-5	28-	0		No				No		No	No				Normal			2022-08-12
1064			27			Henan Province	Non-local Migrant Population	Undergraduate degree	Office Personnel and Related Workers	2022-08-12	2022-08-12	2022-05-28	2023-03-04	10weeks6days	1	0	157.00			62	93	56.00			25	12	7-	28-	No			No	No	No	No		No	No		Routine prenatal care		Normal	28	Good	2022-08-12
1065			32				Shanghai	Undergraduate degree	Unclassified Workers	2022-08-12	2022-08-12	2022-06-24	2023-03-31	7weeks	1	0	160.00			77	113	51.00	Denial of Common Medical History		31	13	5-	30-	No		No				No		No	No		Routine prenatal care		Normal	28	Good	2022-08-12
1066			33				Non-local permanent residents	Undergraduate degree	Unclassified Workers	2022-08-12	2022-08-12	2022-06-06	2023-03-13	9weeks4days	2	1	158.00			66	109	50.00			25	13	6-	30-	No		No				No		No	No		High-risk pregnancy care,Scarred uterus		Scarred uterus	37	Good	2022-08-12
1067			31				Non-local permanent residents	Other Situations		2022-08-12	2022-08-12	2022-06-27	2023-04-03	6weeks4days	1	0	152.00			65	110	50.00			26	14	5-7	30-	No		No				No		No	No				Normal			2022-08-12
1068			33			Shanghai	Shanghai	Undergraduate degree	Skilled Professionals	2022-08-13	2022-08-13	2022-06-13	2023-03-20	8weeks5days	2	1	157.00			67	131	75.00			25	13	6-	26-	No		No				No		No	No		Scarred uterus： Post-myomectomy ,High-risk pregnancy care：BMI>28，Pregnancy Hypertension		Scarred uterus,BMI≥28	34	Good	2022-08-13
1069			36			Hubei Province	Non-local permanent residents	Undergraduate degree	Skilled Professionals	2022-08-13	2022-08-13	2022-06-12	2023-03-19	8weeks6days	6	1	160.50			68	115	65.00			31	14	3-4	30-	No		No				No		No	No		Scarred uterus^One cesarean section,Pregnancy with a history of multiple induced abortions,High-risk pregnancy care^:BMI>24,Pregnancy Monitoring for Advanced Maternal Age Multiparous Women		Age≥35,Scarred uterus,BMI≥24, Various types of miscarriage ≥3	41	Good	2022-08-13
1070			31			Shandong Province	Non-local permanent residents	Undergraduate degree	Office Personnel and Related Workers	2022-08-13	2022-08-13	2022-05-06	2023-02-10	14weeks1days	1	0	165.50			54	120	51.00	Denial of Common Medical History	No	27	15	3-	30-45	No		No				No		No	week 4		Routine prenatal care		Normal	34	Good	2022-08-13
1071			37			Anhui Province	Non-local permanent residents	Senior Secondary Education	Unclassified Workers	2022-08-13	2022-08-13	2022-06-04	2023-03-11	10weeks	4	2	157.50			54	97	49.00	Denial of Common Medical History	No	27	14	3-5	30-	No		0	No	No		No		No	No		Pregnancy Monitoring for Advanced Maternal Age Multiparous Women		Age≥35	38	Good	2022-08-13
1072			28			Jiangsu Province	Non-local permanent residents	Undergraduate degree	Skilled Professionals	2022-08-13	2022-08-13	2022-06-01	2023-03-08	10weeks3days			162.00			76	113	59.00			26	13	5-7	35-	No		No				No		No	No		Routine prenatal care		Normal	27	Good	2022-08-13
1073			30			Shanxi Province	Shanghai	Postgraduate Education	Skilled Professionals	2022-08-13	2022-08-13	2022-06-18	2023-03-25	8weeks	1	0	155.00			63	117	50.00	Denial of Common Medical History	No	28	15	4-6	28-	No		0		No		No		No	No		Routine prenatal care		Normal	28	Good	2022-08-13
1074			33			Anhui Province	Non-local permanent residents	Postgraduate Education	Skilled Professionals	2022-08-13	2022-08-13	2022-05-29	2023-03-05	10weeks6days	1	0	168.50			99	146	60.00		Dienogest Progesterone，Heparin	26	14	5-6	30-	No		No				No		No	No		Thyroid nodules,Pregnancy supervision with a history of ectopic pregnancy,Pregnancy complicated by Gallstones ,hypertension^possible,IVF pregnancy status		Assisted reproductive pregnancy,2|4|Other Situations Yellow alert classification ;Assessment Other Situations:Ectopic pregnancy 史	32	Good	2022-08-13
1075			35			Jiangsu Province	Non-local permanent residents	Undergraduate degree	Skilled Professionals	2022-08-13	2022-08-13	2022-06-09	2023-03-16	9weeks2days			158.00			74	113	48.00	Denial of Common Medical History	Levothyroxine，Hydroxychloroquine，metformin，Dydrogesterone Tablets，Estradiol Valerate Tablets，Angiotensin II receptor blocker (ARB)	30	13	7-	28-			No				No		No	No		Atypical endometrial hyperplasia,| IVF ,HPV infection High risk infection, Low-grade cervical lesion, Hypothyroidism		Assisted reproductive pregnancy,Immune system disorders,Twin pregnancy,2|4|Other Situations Yellow alert classification	38	差	2022-08-13
1076			31			411600000000	Non-local permanent residents	Undergraduate degree	Office Personnel and Related Workers	2022-08-13	2022-08-13	2022-05-27	2023-03-03	11weeks1days	1	0	157.00			68	111	60.00	Denial of Common Medical History		29	14	5-7	30-	No		No				No		No	No		High-risk pregnancy care：BMI>24,HPV infection medical history		BMI≥24	29	Good	2022-08-13
1077			27			Anhui Province	Non-local permanent residents	College Diploma	Unclassified Workers	2022-08-13	2022-08-13	2022-05-16	2023-02-20	12weeks5days	3	1	165.00			81	116	55.00		Dienogest Progesterone	22	15	5-6	30-	No		No				No		Other Situations	No		Routine prenatal care		Normal	26	Good	2022-08-13
1078			28			Heilongjiang Province	Non-local permanent residents	Undergraduate degree	Skilled Professionals	2022-08-13	2022-08-13	2022-06-11	2023-03-18	9weeks	1	0	163.50			62	112	56.60			26	13	5-	30-	No		No				No		No	No		Routine prenatal care		Normal	27	Good	2022-08-13
1079			32			Jiangsu Province	Non-local permanent residents	Undergraduate degree	Office Personnel and Related Workers	2022-08-13	2022-08-13	2022-06-10	2023-03-17	9weeks1days	1	0	161.00			64	109	62.00			26	12	5-	28-	No		No				No		No	No		Routine prenatal care		Normal	32	Good	2022-08-13
1080			36				Non-local permanent residents	Postgraduate Education	Unclassified Workers	2022-08-13	2022-08-13	2022-05-10	2023-02-14	13weeks4days	2	1	158.00			62	101	55.00				12	7-	30-	No		No				No		No	No		Pregnancy Monitoring for Advanced Maternal Age Multiparous Women		Age≥35	39	Good	2022-08-13
1081			29			Jiangsu Province	Non-local Migrant Population	Undergraduate degree	Unclassified Workers	2022-08-13	2022-08-13	2022-06-04	2023-03-11	10weeks	2	1	169.00			60	115	54.00	Denial of Common Medical History	No	25	16	8-9	28-	No		No	No	No		No		No	No		High-risk pregnancy care：Uterine discharge after delivery , anemia		Normal	30	Good	2022-08-13
1082			30			Anhui Province	Non-local permanent residents	Undergraduate degree	Skilled Professionals	2022-08-13	2022-08-13	2022-06-08	2023-03-15	9weeks3days	1	0	159.50			76	110	64.00	Denial of Common Medical History	Kangnaide Multivitamin Capsule	27	12	7-	40-	No		No	No	No		No		No	No		High-risk pregnancy care：BMI>24		BMI≥24	30	Good	2022-08-13
1083			29			Jiangsu Province	Shanghai	Postgraduate Education	Office Personnel and Related Workers	2022-08-13	2022-08-13	2022-05-29	2023-03-05	10weeks6days	1	0	160.00			70	109	55.00			26	13	3-4	28-	No		No				No		No	No		Routine prenatal care		Normal	32	Good	2022-08-13
1084			28			371600000000	Non-local permanent residents	College Diploma	Unclassified Workers	2022-08-13	2022-08-13	2022-05-28	2023-03-04	11weeks	1	0	162.00			59	101	62.50	Denial of Common Medical History	No	25	15	4-5	31-	No		No				No		No	No		Routine prenatal care		Normal	30	Good	2022-08-13
1085			32			Heilongjiang Province	Non-local permanent residents	Undergraduate degree	Office Personnel and Related Workers	2022-08-13	2022-08-13	2022-06-03	2023-03-10	10weeks1days	2	0	174.50			63	113	75.00			26	16	8-9	28-		Two years ago, hives (urticaria) were diagnosed, with acute episodes treated with calamine lotion for external use. During pregnancy, there were two acute episodes, but no medication was used. In 2021, a thyroid nodule was discovered, but regular follow-up has not been conducted.					No		No	No		High-risk pregnancy care：BMI>24，Urticaria,Thyroid nodules,History of tuberculosis		BMI≥24	33	Good	2022-08-13
1086			31			Jiangsu Province	Non-local permanent residents	Postgraduate Education	Skilled Professionals	2022-08-13	2022-08-13	2022-06-08	2023-03-15	9weeks3days	1	0	161.50			61	102	58.00			28	14	3-5	35-37		In 2021, a left kidney cyst was discovered (size not clear), with regular follow-up showing no significant changes in kidney function		No	No	No	No		No	No		High-risk pregnancy care： Left kidney cyst		Normal	29	Good	2022-08-13
1087			34				Non-local permanent residents	Postgraduate Education	Unclassified Workers	2022-08-13	2022-08-13	2022-05-25	2023-03-01	11weeks3days	1	0	168.00			60	103	60.00			27	12	5-7	25-	No		No				No		No	No				Normal	32	Good	2022-08-13
1088			36			Shandong Province	Shanghai	Postgraduate Education	Unclassified Workers	2022-08-13	2022-08-13	2022-06-02	2023-03-09	10weeks2days	2	0	167.00			70	123	61.00			30	14	7-10	28-	No					No			No	No				Normal	40	Good	2022-08-13
1089			29			Shanghai	Shanghai	Undergraduate degree	Unclassified Workers	2022-08-13	2022-08-13	2022-05-28	2023-03-04	11weeks	1	0	165.00			80	137	55.40	Denial of Common Medical History	No	27	14	4-5	28-	No		No				No		No	No		Routine prenatal care,hypertension^possible		Normal	32	Good	2022-08-13
1090			30			Shanghai	Shanghai	Other Situations	Unclassified Workers	2022-08-13	2022-08-13	2022-04-28	2023-02-02	15weeks2days			167.00			56	120	68.00			28	15	5-5	35-	No						No		No	No				BMI≥24	31	Good	2022-08-13
1091			29			Yunnan Province	Non-local permanent residents	Undergraduate degree	Unclassified Workers	2022-08-13	2022-08-13	2022-06-28	2023-04-04	6weeks4days	2	0	159.00			63	104	62.50			24	15	2-3	28-30		In 2022, chronic gastritis and H. pylori infection were diagnosed, and after antibiotic treatment, the infection was cleared. In 2020, a hepatic hemangioma (1 cm in diameter) was discovered	No	No	Grandmother has a history of pulmonary tuberculosis.		No		No	No		High-risk pregnancy care：BMI>24,Chronic gastritis		BMI≥24	29	Good	2022-08-13
1092			35			Shanghai	Shanghai	Undergraduate degree	Office Personnel and Related Workers	2022-08-13	2022-08-13	2022-06-07	2023-03-14	9weeks4days	1	0	163.00			83	144	52.50			30	16	5-7	28-	No		No				No		No	No		Routine prenatal care		2|4|Other Situations Yellow alert classification	35	Good	2022-08-13
1093			32			Shanghai	Shanghai	Postgraduate Education	Unclassified Workers	2022-08-13	2022-08-13	2022-06-07	2023-03-14	9weeks4days	1	0	170.00			67	104	55.00	Denial of Common Medical History	No	29	14	4-5	28-	No		0	No	No		No		No	No		Routine prenatal care		Normal	32	Good	2022-08-13
1094			30			Shanghai	Shanghai	Undergraduate degree	Office Personnel and Related Workers	2022-08-13	2022-08-13	2022-06-09	2023-03-16	9weeks2days	1	0	156.00			49	101	43.00	Denial of Common Medical History	No	25	14	5-	28-	No		0	No	No		No		No	No		High-risk pregnancy care：BMI<18.5		BMI＜18.5	29	Good	2022-08-13
1095			32				Non-local Migrant Population	Undergraduate degree	Unclassified Workers	2022-08-13	2022-08-13	2022-06-12	2023-03-19	8weeks6days			165.00			73	104	65.00	Denial of Common Medical History	No	28	14	5-7	30-	No		No				No		No	No				Normal	31	Good	2022-08-13
1096			36			Jiangsu Province	Non-local Migrant Population	Undergraduate degree	Office Personnel and Related Workers	2022-08-13	2022-08-13	2022-06-11	2023-03-18	9weeks	3	1	160.00			65	97	54.00	Denial of Common Medical History	No	26	17	7-	28-	No		0	No	No		No		No	No		Pregnancy Monitoring for Advanced Maternal Age Multiparous Women,Adenomyosis,Scarred uterusOne cesarean section		Age≥35,Scarred uterus,2|4|Other Situations Yellow alert classification ;Assessment Other Situations:Adenomyosis	37	Good	2022-08-13
1097			34			Shanghai	Shanghai	Undergraduate degree	Office Personnel and Related Workers	2022-08-13	2022-08-13	2022-06-16	2023-03-23	8weeks2days	1	0	164.00			66	100	43.00	Denial of Common Medical History	No	33	14	7-	31-	No		No				No		No	No		Thyroid nodules,High-risk pregnancy care：BMI<18.5		BMI＜18.5	31	Good	2022-08-13
1098			29			Shanghai	Shanghai	Postgraduate Education	Office Personnel and Related Workers	2022-08-13	2022-08-13	2022-06-08	2023-03-15	9weeks3days	1	0	163.00			70	105	50.00			27	15	5-6	35-37	No		No				No		No	No		Routine prenatal care		Normal	29	Good	2022-08-13
1099			30			Guizhou Province	Non-local permanent residents	Undergraduate degree	Unclassified Workers	2022-08-13	2022-08-13	2022-05-13	2023-02-17	13weeks1days	1	0	155.00			69	117	60.00			27	14	5-	30-31	No		No				No		No	No		High-risk pregnancy care：BMI>24		BMI≥24	30	Good	2022-08-13
1100			29			Hubei Province	Non-local permanent residents	Undergraduate degree	Office Personnel and Related Workers	2022-08-13	2022-08-13	2022-06-12	2023-03-19	8weeks6days			155.00			80	139	55.00	Denial of Common Medical History		27	14	6-7	30-		Gallstones	No				No		No	No		Routine prenatal care		Normal	30		2022-08-13
1101			28			Anhui Province	Shanghai	Postgraduate Education	Public Servants	2022-08-13	2022-08-13	2022-06-03	2023-03-10	10weeks1days	1	0	167.00			76	127	51.00	Denial of Common Medical History	No	24	12	5-6	28-40	No		No				No		No	No		Routine prenatal care		Normal	29	Good	2022-08-13
1102			24			Jiangsu Province	Shanghai	Undergraduate degree	Unclassified Workers	2022-08-13	2022-08-13	2022-05-14	2023-02-18	13weeks	1	0	169.00			69	134	82.00	Denial of Common Medical History		23	15	6-7	30-31	No		No				No		No	No		High-risk pregnancy careBMI>28,Pregnancy complicated by Fungal vaginitis		2|4|Other Situations Yellow alert classification ;Assessment Other Situations:Mold-related vaginitis ,BMI≥28	39	Good	2022-08-13
1103			30			Henan Province	Non-local permanent residents	Postgraduate Education	Office Personnel and Related Workers	2022-08-13	2022-08-13	2022-06-15	2023-03-22	8weeks3days	1	0	176.00			52	99	62.50	Denial of Common Medical History	Folic acid	27	15	5-7	28-30	No		No				No		No	No		Thyroid nodules,Routine prenatal care		Thyroid disease that does not require medication	30	Good	2022-08-13
1104			29			Anhui Province	Non-local permanent residents	College Diploma	Office Personnel and Related Workers	2022-08-13	2022-08-13	2022-06-26	2023-04-02	6weeks6days	1	0	165.00			78	106	55.00			28	14	5-	30-	No						No		No	No		Twin pregnancy		Twin pregnancy	25	Good	2022-08-13
1105			28			Shandong Province	Non-local permanent residents	Undergraduate degree	Office Personnel and Related Workers	2022-08-13	2022-08-13	2022-05-30	2023-03-06	10weeks5days	1	0	157.00			56	94	65.00			25	12	7-	30-	No		No				No		No	No		High-risk pregnancy careBMI≥24,Pregnancy complicated by Fungal vaginitis		BMI≥24,2|4|Other Situations Yellow alert classification ;Assessment Other Situations:Mold-related vaginitis	26	Good	2022-08-13
1106			34			Shanghai	Shanghai	Undergraduate degree	Office Personnel and Related Workers	2022-08-13	2022-08-13	2022-05-31	2023-03-07	10weeks4days	1	0	163.50			54	106	60.00			30	14	3-5	28-		PCOS was diagnosed over 2 years ago, and oral treatment with letrozole was administered until pregnancy. Hyperthyroidism was diagnosed over 4 years ago, treated with methimazole until pregnancy, and during pregnancy, oral propylthiouracil was started at a dosage of 0.5 tablets daily.	No	No	No				No	No		Pregnancy complicated by hyperthyroidism,PCOS		Hyperthyroidism requiring medication	35	Good	2022-08-13
1107			33			Henan Province	Non-local permanent residents	Undergraduate degree	Unclassified Workers	2022-08-13	2022-08-13	2022-05-12	2023-02-16	13weeks2days			162.00			61	100	55.00			31	14	6-7	28-	No		No				No		No	No		Pregnancy complicated by Fungal vaginitis		Normal	33	Good	2022-08-13
1108			38			Henan Province	Non-local permanent residents	Undergraduate degree	Office Personnel and Related Workers	2022-08-13	2022-08-13	2022-05-24	2023-02-28	11weeks4days	4	1	164.50			57	106	58.00	Denial of Common Medical History	Multivitamin tablet ， Folic acid	27	12	3-5	25-28	No		No				No		No	No		Pregnancy Monitoring for Advanced Maternal Age Multiparous Women,Chronic pelvic inflammatory disease,High-risk pregnancy care：History of surgery for breast fibroadenoma		Age≥35	39	Good	2022-08-13
1109			33			Jiangsu Province	Shanghai	Postgraduate Education	Office Personnel and Related Workers	2022-08-13	2022-08-13	2022-06-18	2023-03-25	8weeks	1	0	166.00			72	119	50.00	Denial of Common Medical History	No	27	12	7-	20-40	No		No				No		No	No		High-risk pregnancy care：BMI<18.5,Pregnancy complicated by hypothyroidism,PCOS		BMI＜18.5,Uncomplicated hypothyroidism requiring medication	32	Good	2022-08-13
1110			31			Henan Province	Non-local permanent residents	Undergraduate degree	Office Personnel and Related Workers	2022-08-13	2022-08-13	2022-05-18	2023-02-22	12weeks3days	1	0	159.00			75	125	54.00	Denial of Common Medical History	Antiabortifacient	29	15	3-5	37-	No		No				No		No	No		right ^ mesosalpinx cyst^possible,Routine prenatal care		Normal	32	Good	2022-08-13
1111			34			Shaanxi Province	Shanghai	Postgraduate Education	Office Personnel and Related Workers	2022-08-13	2022-08-13	2022-05-24	2023-02-28	11weeks4days	1	0	165.50			59	97	59.00	Denial of Common Medical History	Antiabortifacient	32	12	4-5	35-40	No		No				No		No	No		PCOS,Routine prenatal care		Normal	37	Good	2022-08-13
1112			38			Anhui Province	Non-local permanent residents	Undergraduate degree	Unclassified Workers	2022-08-15	2022-08-15	2022-05-26	2023-03-02	11weeks4days	3	1	159.00			75	96	50.00	Denial of Common Medical History		33	14	5-6	30-35	No		No				No		No	No		Pregnancy Monitoring for Advanced Maternal Age Multiparous Women,Scarred uterusHistory of cesarean section in the previous pregnancy		Age≥35,Scarred uterus	35	Good	2022-08-15
1113			30			Shandong Province	Shanghai	Postgraduate Education	Skilled Professionals	2022-08-15	2022-08-15	2022-06-15	2023-03-22	8weeks5days	1	0	168.50			69	112	49.00			29	12	5-7	28-31	No		No				No		No	No		High-risk pregnancy care：BMI＜18.5,Thyroid nodules		BMI＜18.5,Thyroid disease that does not require medication	29	Good	2022-08-15
1114			41				Non-local permanent residents	Other Situations		2022-08-15	2022-08-15	2022-06-05	2023-03-12	10weeks1days	1	0	163.00			58	104	59.00			31	12	7-	30-	No		No				No		No	No				Age≥40			2022-08-15
1115			38			Shanghai	Shanghai	Undergraduate degree	Office Personnel and Related Workers	2022-08-15	2022-08-15	2022-06-10	2023-03-17	9weeks3days	3	1	156.00			74	131	56.00			28	15	6-	28-							No		No	No				Age≥35	40	Fair	2022-08-15
1116			31			310100000000	Shanghai	Other Situations	Skilled Professionals	2022-08-15	2022-08-15	2022-06-13	2023-03-20	9weeks	1	0	170.00			76	113	56.00			28	12	5-7	32-	No		No				No		No	No				Arrhythmia	29	Good	2022-08-15
1117			42			Guizhou Province	Shanghai	Undergraduate degree	Office Personnel and Related Workers	2022-08-15	2022-08-15	2022-06-05	2023-03-12	10weeks1days	3	1	155.00			63	106	45.00			29	14	5-	28-	No		No				No		No	No				Age≥40	39	Good	2022-08-15
1118			26			Shanghai	Shanghai	Undergraduate degree	Commercial and Service Industry Personnel	2022-08-15	2022-08-15	2022-05-16	2023-02-20	13weeks	2	1	171.00			71	121	55.00	Denial of Common Medical History	No,	22	14	5-7	28-	No		Serious genetic diseases （Genetic hyperlipidemia）				Procaine	History of skin test allergy ，Unclear	Alcohol	0		Routine prenatal care		Normal	32	Good	2022-08-15
1119			36			Anhui Province	Non-local permanent residents	Vocational Secondary Education	Unclassified Workers	2022-08-15	2022-08-15	2022-06-13	2023-03-20	9weeks	2	1	162.00			72	125	65.00	Denial of Common Medical History	No	29	15	5-7	35-	0	c-s	0	No	No	No	No		No	No		High-risk pregnancy care^：BMI≥24,Scarred uterus^History of cesarean section in the previous pregnancy		BMI≥24,Scarred uterus	32	Good	2022-08-15
1120			30			Shanghai	Shanghai	College Diploma	Office Personnel and Related Workers	2022-08-15	2022-08-15	2022-05-31	2023-03-07	10weeks6days	3	0	159.50			56	122	59.00			22	11	7-	28-31	No		No				No		No	No		Pregnancy supervision with a history of embryonic arrest,High-risk pregnancy care,Monitoring of pregnancy with a history of fetal malformation Previous pregnancy 染色体2号3倍、13号3倍、Y2倍		Adverse obstetric history,2|4|Other Situations Yellow alert classification ;Assessment Other Situations:：Previous pregnancy 染色体2号3倍、13号3倍、Y2倍	28		2022-08-15
1121			25			Anhui Province	Non-local permanent residents	Undergraduate degree		2022-08-15	2022-08-15	2022-05-23	2023-02-27	12weeks	1	0	162.50			56	104	46.00			22	11	6-7	30-35	No		No				No		No	No		High-risk pregnancy care：BMI≤18.5		BMI＜18.5	32		2022-08-15
1122			34			Shanghai	Shanghai	Undergraduate degree	Office Personnel and Related Workers	2022-08-15	2022-08-15	2022-06-06	2023-03-13	10weeks	2	0	171.00			58	102	62.00			32	13	5-6	30-		After the right lobe of the thyroid was surgically removed in 2015, Euthyrox 75 µg has been taken until now.	No				No		No	No		History of thyroid cancer：Post-right lobe papillary carcinoma resection ,High-risk pregnancy care： Postoperative treatment of thyroid malignancy		Uncomplicated hypothyroidism requiring medication,3|4|Other Situations Orange Warning Classification ;Assessment Other Situations:Postoperative status after Papillary Thyroid Carcinoma (right lobectomy).	34		2022-08-15
1123			39			Gansu Province	Non-local permanent residents	Undergraduate degree	Office Personnel and Related Workers	2022-08-15	2022-08-15	2022-05-25	2023-03-01	11weeks5days	1	0	160.00			67	103	48.00			33	14	5-7	30-	No		No				No		No	No				Age≥35,Assisted reproductive pregnancy	40	Good	2022-08-15
1124			28			Jiangsu Province	Non-local permanent residents	Undergraduate degree	Office Personnel and Related Workers	2022-08-15	2022-08-15	2022-06-17	2023-03-24	8weeks3days	1	0	167.50			73	109	55.00	Denial of Common Medical History	No	25	16	7-	30-	0	Surgery for a right breast fibroadenoma.	0	No	No	No	No		No	No		Routine prenatal care		Normal	26	Good	2022-08-15
1125			36				Non-local permanent residents	Other Situations		2022-08-15	2022-08-15	2022-07-01	2023-04-07	6weeks3days	2	0	160.00			65	108	65.00			32	14	5-6	30-	No		No				No		No	No				Age≥35,Ovarian cyst≥5cm,BMI≥24			2022-08-15
1126			29			Jiangsu Province	Non-local permanent residents	Senior Secondary Education	Office Personnel and Related Workers	2022-08-15	2022-08-15	2022-05-23	2023-02-27	12weeks	2	1	158.50			65	118	65.00			24	13	5-7	25-60	No		No				No		No	No		High-risk pregnancy care^：BMI≥24,Scarred uterus^History of cesarean section in the previous pregnancy		BMI≥24,Scarred uterus	26	Good	2022-08-15
1127			33			Jilin Province	Non-local permanent residents	Postgraduate Education	Office Personnel and Related Workers	2022-08-15	2022-08-15	2022-06-15	2023-03-22	8weeks5days	2	0	170.00			63	108	47.00			26	14	5-6	30-33		History of ectopic pregnancy surgery		No	No	No		No	No	No		Pregnancy supervision with a history of ectopic pregnancy,High-risk pregnancy care：BMI≤18.5		BMI＜18.5	35	Good	2022-08-15
1128			31			Shandong Province	Shanghai	Postgraduate Education	Public Servants	2022-08-15	2022-08-15	2022-04-19	2023-01-24	16weeks6days	1	0	159.00			64	108	62.00			26	13	5-7	45-	No		No	No	No		No		No	No				BMI≥24	30	Good	2022-08-15
1129			31			Shanxi Province	Non-local permanent residents	Undergraduate degree	Skilled Professionals	2022-08-15	2022-08-15	2022-04-29	2023-02-03	15weeks3days	3	1	160.00			64	93	51.00	Denial of Common Medical History	No	25	13	5-6	30-	No		0	No	No	No	No		No	No				Scarred uterus	31	Good	2022-08-15
1130			36			Jiangsu Province	Non-local permanent residents	College Diploma	Office Personnel and Related Workers	2022-08-15	2022-08-15	2022-06-18	2023-03-25	8weeks2days	3	1	150.00			134	160	55.00	Denial of Common Medical History	No	27	12	5-	29-	No		0				No		No	没with		High-risk pregnancy care		Age≥35,BMI≥24,Scarred uterus	35	Good	2022-08-15
1131			32			Liaoning Province	Shanghai	Postgraduate Education	Office Personnel and Related Workers	2022-08-15	2022-08-15	2022-05-30	2023-03-06	11weeks	3	0	170.00			75	117	58.00	Denial of Common Medical History	Antiabortifacient	28	12	7-	28-	0	History of axillary sweat gland surgery	0	No	No	No	0	No	No	No		left mesosalpinx cyst,Pregnancy supervision with a history of embryonic arrest,High-risk pregnancy care		2|4|Other Situations Yellow alert classification ;Assessment Other Situations:Previous pregnancy: missed abortion (specifics not clear).	34	Good	2022-08-15
1132			35			341300000000	Non-local permanent residents	College Diploma	Office Personnel and Related Workers	2022-08-15	2022-08-15	2022-05-28	2023-03-04	11weeks2days	3	1	167.50			56	91	53.00			25	14	5-6	28-	No			No	No	No	No		No	No		Routine prenatal care		Normal	34	Good	2022-08-15
1133			34				Shanghai	Other Situations		2022-08-15	2022-08-15	2022-07-01	2023-04-07	6weeks3days	1	0	172.00			65	124	70.00			30	16	5-7	28-30	No						No		No	No				Normal			2022-08-15
1134			30			Fujian Province	Shanghai	Postgraduate Education	Office Personnel and Related Workers	2022-08-16	2022-08-16	2022-06-12	2023-03-19	9weeks2days	1	0	161.50			59	110	65.00	Denial of Common Medical History	No	28	14	6-	35-	No		No				No		No	No		High-risk pregnancy care：BMI>24		BMI≥24	29	Good	2022-08-16
1135			34				Non-local Migrant Population	Undergraduate degree	Unclassified Workers	2022-08-16	2022-08-16	2022-06-09	2023-03-16	9weeks5days	1	0	167.00			75	117	60.00			32	12	5-7	30-	No						No		No	No					32	Good	2022-08-16
1136			33			Shanghai	Shanghai	Undergraduate degree	Office Personnel and Related Workers	2022-08-16	2022-08-16	2022-06-13	2023-03-20	9weeks1days	1	0	165.00			55	97	62.00	Denial of Common Medical History	Chinese herbal supplement for pregnancy support,	31	15	5-7	30-	No		No				No		No	No		High-risk pregnancy care Acute pyelonephritis medical history		Other SituationsKidney disease，The current condition is stable and the renal function is normal	31	Good	2022-08-16
1137			29			Shandong Province	Non-local permanent residents	Undergraduate degree	Skilled Professionals	2022-08-16	2022-08-16	2022-05-31	2023-03-07	11weeks	1	0	170.00			85	106	51.00			27	18	5-7	25-	No			No	No	No	No		No	No		High-risk pregnancy care：BMI＜18.5		BMI＜18.5	34	Good	2022-08-16
1138			33			Shanghai	Shanghai	Postgraduate Education	Office Personnel and Related Workers	2022-08-16	2022-08-16	2022-06-12	2023-03-19	9weeks2days	1	0	163.00			75	119	55.00	Denial of Common Medical History	Dydrogesterone Tablets	29	14	-	35-	No		No	No	No		No		No	No					32	Good	2022-08-16
1139			32			Henan Province	Non-local permanent residents	College Diploma	Unclassified Workers	2022-08-16	2022-08-16	2022-05-23	2023-02-27	12weeks1days	2	1	153.00			66	116	60.00	Denial of Common Medical History	No	28	14	5-	30-	0	Rh-negative blood; did not receive anti-D immunoglobulin during the previous pregnancy	0	No	No	No	0	Sulpiride	No	No		High-risk pregnancy care：BMI≥24，RH negative ， Previous pregnancy subclinical Hypothyroidism （ Oral levothyroxine ）		BMI≥24,2|4|Other Situations Yellow alert classification ;Assessment Other Situations:RHnegative 血	33	Good	2022-08-16
1140			31			Sichuan Province	Non-local permanent residents	College Diploma	Office Personnel and Related Workers	2022-08-16	2022-08-16	2022-06-09	2023-03-16	9weeks5days	3	0	164.50			80	123	70.00	Denial of Common Medical History	No	26	10	7-	28-32	0	Discovered hepatitis C in 2007, treated with interferon at Longhai Hospital. Viral load is less than 500, liver function is regular, and follow-up has been ongoing with no issues	0			No	No		No	No		High-risk pregnancy care：BMI>24， Hepatitis C medical history ,Postoperative status after resection of incomplete uterine septum.		BMI≥24,2|4|Other Situations Yellow alert classification ;Assessment Other Situations:Postoperative status after hysteroscopic resection of uterine incomplete septum.	32	Good	2022-08-16
1141			38			310100000000	Shanghai	College Diploma	Office Personnel and Related Workers	2022-08-16	2022-08-16	2022-05-21	2023-02-25	12weeks3days	1	0	169.00			88	126	49.00	Denial of Common Medical History		34	15	5-7	28-	No		No				No		No	No					37	Good	2022-08-16
1142			37			Inner Mongolia Autonomous Region	Non-local permanent residents	Undergraduate degree	Office Personnel and Related Workers	2022-08-16	2022-08-16	2022-06-30	2023-04-06	6weeks5days	4	1	158.00			77	113	52.00			28	14	6-	26-	No						No		No	No		Pregnancy Monitoring for Advanced Maternal Age Multiparous Women,High-risk pregnancy care： Previous pregnancy Gestational diabetes		Age≥35	34	Good	2022-08-16
1143			34				Shanghai	Undergraduate degree	Unclassified Workers	2022-08-16	2022-08-16	2022-05-14	2023-02-18	13weeks3days	1	0	165.50			85	136	55.00			31		-	25-	No		No	No	No		No		No	No					35	Good	2022-08-16
1144			33			Liaoning Province	Shanghai	Postgraduate Education	Skilled Professionals	2022-08-16	2022-08-16	2022-06-27	2023-04-03	7weeks1days	1	0	172.00			99	121	65.00			30	13	7-	42-	No		No				No		No	No		Routine prenatal care		Normal	29	Good	2022-08-16
[truncated: 7,824 more rows]

## Sheet: Lab Tests
				Application Date	pregnancy weeks	Card Issuance Date	Check Date / Examination Date	Item Code	Item Name	Result	Unit	Reference Value	Item Category
[truncated: 65,535 more rows]

## Sheet: First-trimester screening (incl
				Application Date	Gestational Weeks:Gestational Weeks:	Registration Date	Examination Date	Test Name		Diagnostic Impression
[truncated: 6,556 more rows]

[truncated: 1 more sheets: Clinical History]
