# Supplementary material for: Psychological distress and pregnancy outcomes in early-stage gestational hypertension: a case-control study from China
Source: PeerJ journal article supplement (doi:10.7717/peerj.19574), 2025-06-20
Supplement: Results.xls [file Results.xls]

## Sheet: Summary
				Scale type	Scale period	Questionnaire title	Score	Response time	Result	Submission time	Completion status	I feel more nervous and anxious than usual	I feel afraid for no reason at all	I get upset easily or feel panicky	I feel like I’m falling apart and going to pieces	I feel that everything is all right and nothing bad will happen	My arms and legs shake and tremble	I am bothered by headaches neck and back pain	I feel weak and get tired easily	I feel calm and can sit still easily	I can feel my heart beating fast	I am bothered by dizzy spells	I have fainting spells or feel like it	I can breathe in and out easily	I get numbness and tingling in my fingers and toes	I am bothered by stomach aches or indigestion	I have to empty my bladder often	My hands are usually dry and warm	My face gets hot and blushes	I fall asleep easily and get a good night’s rest	I have nightmares
				Early pregnancy	Maternal mental health assessment	Self-rating Anxiety Scale (SAS)	32	1 min	normal	2022-06-06 08:19:13	Finish	1	1	1	1	4	1	1	1	4	1	1	1	4	1	1	1	4	1	1	1
				Early pregnancy	Maternal mental health assessment	Self-rating Anxiety Scale (SAS)	23	2 min	normal	2022-06-06 08:28:08	Finish	1	1	1	1	1	1	1	1	1	1	1	1	1	1	1	2	3	1	1	1
				Early pregnancy	Maternal mental health assessment	Self-rating Anxiety Scale (SAS)	28	2 min	normal	2022-06-06 09:14:56	Finish	2	1	2	1	2	1	2	2	2	1	1	1	1	1	1	2	1	1	2	1
				Early pregnancy	Maternal mental health assessment	Self-rating Anxiety Scale (SAS)	32	2 min	normal	2022-06-06 09:15:17	Finish	1	1	1	1	1	2	1	3	1	2	1	1	3	1	3	2	1	1	3	2
				Mid-pregnancy	Maternal mental health assessment	Self-rating Anxiety Scale (SAS)	31	2 min	normal	2022-06-06 09:29:09	Finish	2	1	1	1	1	4	4	1	2	1	1	1	1	1	1	1	4	1	1	1
				Early pregnancy	Maternal mental health assessment	Self-rating Anxiety Scale (SAS)	23	3 min	normal	2022-06-06 09:52:32	Finish	2	1	1	1	1	1	1	2	1	1	1	1	1	1	1	1	1	1	1	2
				Early pregnancy	Maternal mental health assessment	Self-rating Anxiety Scale (SAS)	24	1 min	normal	2022-06-06 10:08:58	Finish	1	1	1	1	2	1	1	1	1	1	1	1	1	1	1	3	2	1	1	1
				Early pregnancy	Maternal mental health assessment	Self-rating Anxiety Scale (SAS)	36	2 min	normal	2022-06-06 10:10:43	Finish	2	2	2	1	4	1	2	2	2	3	2	2	1	1	2	2	1	1	2	1
				Mid-pregnancy	Maternal mental health assessment	Self-rating Anxiety Scale (SAS)	30	2 min	normal	2022-06-06 10:41:17	Finish	1	1	1	1	1	1	1	1	1	1	1	1	4	1	1	2	4	1	3	2
				Early pregnancy	Maternal mental health assessment	Self-rating Anxiety Scale (SAS)	35	2 min	normal	2022-06-06 10:43:04	Finish	2	2	2	1	2	1	1	1	1	3	1	1	2	1	3	2	2	2	4	1
				Early pregnancy	Maternal mental health assessment	Self-rating Anxiety Scale (SAS)	35	2 min	normal	2022-06-06 10:43:54	Finish	2	1	1	1	3	1	2	1	4	2	1	1	4	1	1	2	2	2	2	1
				Early pregnancy	Maternal mental health assessment	Self-rating Anxiety Scale (SAS)	45	3 min	mild	2022-06-06 10:49:09	Finish	2	2	2	2	3	2	2	3	2	2	2	1	3	3	3	2	2	2	3	2
				Early pregnancy	Maternal mental health assessment	Self-rating Anxiety Scale (SAS)	21	2 min	normal	2022-06-06 10:53:21	Finish	1	1	1	1	1	1	1	1	1	1	1	1	1	1	1	2	1	1	1	1
				Early pregnancy	Maternal mental health assessment	Self-rating Anxiety Scale (SAS)	36	2 min	normal	2022-06-06 10:54:29	Finish	1	1	1	1	4	1	1	1	4	1	1	1	4	1	1	2	4	1	4	1
				Early pregnancy	Maternal mental health assessment	Self-rating Anxiety Scale (SAS)	22	1 min	normal	2022-06-06 10:57:56	Finish	1	1	1	1	1	1	1	1	1	1	1	1	1	1	1	3	1	1	1	1
				Early pregnancy	Maternal mental health assessment	Self-rating Anxiety Scale (SAS)	38	2 min	normal	2022-06-06 11:03:42	Finish	2	2	2	2	3	1	2	3	2	1	1	2	2	1	2	3	2	1	2	2
				Mid-pregnancy	Maternal mental health assessment	Self-rating Anxiety Scale (SAS)	33	2 min	normal	2022-06-06 11:17:27	Finish	1	1	1	1	4	1	1	1	4	1	1	1	4	1	1	2	4	1	1	1
				Early pregnancy	Maternal mental health assessment	Self-rating Anxiety Scale (SAS)	32	3 min	normal	2022-06-06 13:43:57	Finish	2	1	1	1	1	1	1	1	2	1	1	1	4	1	3	2	4	1	2	1
				Early pregnancy	Maternal mental health assessment	Self-rating Anxiety Scale (SAS)	27	2 min	normal	2022-06-06 14:21:08	Finish	1	1	1	1	1	1	1	1	2	1	1	1	4	1	1	2	2	1	2	1
				Early pregnancy	Maternal mental health assessment	Self-rating Anxiety Scale (SAS)	31	3 min	normal	2022-06-06 15:19:35	Finish	1	1	1	1	2	1	1	2	2	3	1	1	2	2	1	1	3	1	3	1
				Early pregnancy	Maternal mental health assessment	Self-rating Anxiety Scale (SAS)	42	1 min	normal	2022-06-07 07:53:25	Finish	1	1	2	1	4	2	1	2	4	2	1	2	3	2	2	2	3	2	3	2
				Early pregnancy	Maternal mental health assessment	Self-rating Anxiety Scale (SAS)	26	5 min	normal	2022-06-07 08:17:19	Finish	1	1	1	1	1	1	1	1	4	1	1	1	1	1	2	2	1	1	2	1
				Early pregnancy	Maternal mental health assessment	Self-rating Anxiety Scale (SAS)	30	2 min	normal	2022-06-07 08:17:40	Finish	1	1	1	1	4	1	1	1	1	1	1	1	4	1	2	2	3	1	1	1
				Mid-pregnancy	Maternal mental health assessment	Self-rating Anxiety Scale (SAS)	30	1 min	normal	2022-06-07 08:28:39	Finish	1	1	1	1	4	1	1	1	2	1	1	1	2	1	2	1	3	1	3	1
				Early pregnancy	Maternal mental health assessment	Self-rating Anxiety Scale (SAS)	31	6 min	normal	2022-06-07 08:38:23	Finish	1	1	1	1	2	1	2	2	3	2	1	1	2	1	1	3	2	1	1	2
				Early pregnancy	Maternal mental health assessment	Self-rating Anxiety Scale (SAS)	31	3 min	normal	2022-06-07 08:43:51	Finish	1	1	1	1	1	1	1	1	2	1	1	1	2	2	2	2	2	2	3	3
				Mid-pregnancy	Maternal mental health assessment	Self-rating Anxiety Scale (SAS)	35	2 min	normal	2022-06-07 08:57:16	Finish	2	1	1	2	4	1	2	2	1	2	2	2	1	1	2	1	2	1	3	2
				Early pregnancy	Maternal mental health assessment	Self-rating Anxiety Scale (SAS)	42	2 min	normal	2022-06-07 09:20:48	Finish	1	3	2	1	2	1	3	2	3	2	2	2	2	1	3	2	2	2	3	3
				Early pregnancy	Maternal mental health assessment	Self-rating Anxiety Scale (SAS)	36	2 min	normal	2022-06-07 09:22:15	Finish	2	2	2	1	2	1	2	2	2	2	1	1	2	1	2	2	2	2	3	2
				Early pregnancy	Maternal mental health assessment	Self-rating Anxiety Scale (SAS)	33	2 min	normal	2022-06-07 09:25:12	Finish	1	1	2	1	4	1	1	2	1	2	1	2	1	1	2	3	1	2	3	1
				Early pregnancy	Maternal mental health assessment	Self-rating Anxiety Scale (SAS)	40	2 min	normal	2022-06-07 09:27:09	Finish	2	2	2	1	4	1	2	3	2	1	2	1	4	2	1	2	4	1	2	1
				Mid-pregnancy	Maternal mental health assessment	Self-rating Anxiety Scale (SAS)	25	2 min	normal	2022-06-07 09:29:52	Finish	1	1	1	1	1	1	1	1	1	1	1	1	1	1	1	2	4	1	2	1
				Early pregnancy	Maternal mental health assessment	Self-rating Anxiety Scale (SAS)	32	3 min	normal	2022-06-07 10:05:50	Finish	1	2	2	1	4	1	1	2	1	2	1	1	1	1	1	3	2	2	1	2
				Early pregnancy	Maternal mental health assessment	Self-rating Anxiety Scale (SAS)	30	2 min	normal	2022-06-07 10:14:31	Finish	1	1	1	1	1	1	1	1	2	2	1	1	2	1	2	3	3	1	2	2
				Early pregnancy	Maternal mental health assessment	Self-rating Anxiety Scale (SAS)	34	3 min	normal	2022-06-07 10:19:27	Finish	2	1	1	1	4	1	1	1	2	1	1	1	1	1	1	3	4	1	3	3
				Mid-pregnancy	Maternal mental health assessment	Self-rating Anxiety Scale (SAS)	34	2 min	normal	2022-06-07 10:19:31	Finish	2	2	2	1	4	1	2	2	1	1	1	1	1	1	2	2	2	2	2	2
				Early pregnancy	Maternal mental health assessment	Self-rating Anxiety Scale (SAS)	42	2 min	normal	2022-06-07 10:23:18	Finish	1	1	2	2	3	1	2	3	4	2	3	2	4	2	1	2	2	1	3	1
				Early pregnancy	Maternal mental health assessment	Self-rating Anxiety Scale (SAS)	29	2 min	normal	2022-06-07 10:23:18	Finish	2	1	1	1	1	2	1	1	2	2	1	1	1	1	2	2	2	1	2	2
				Early pregnancy	Maternal mental health assessment	Self-rating Anxiety Scale (SAS)	23	2 min	normal	2022-06-07 10:24:12	Finish	1	1	1	1	1	1	1	1	1	1	1	1	1	1	1	2	1	1	3	1
				Early pregnancy	Maternal mental health assessment	Self-rating Anxiety Scale (SAS)	30	6 min	normal	2022-06-07 10:27:02	Finish	2	1	1	1	1	1	2	2	4	1	1	1	1	1	1	3	2	1	2	1
				Early pregnancy	Maternal mental health assessment	Self-rating Anxiety Scale (SAS)	41	3 min	normal	2022-06-07 10:36:14	Finish	2	2	2	2	4	2	2	2	2	2	2	1	2	1	2	3	2	2	2	2
				Early pregnancy	Maternal mental health assessment	Self-rating Anxiety Scale (SAS)	25	2 min	normal	2022-06-07 10:36:20	Finish	1	1	1	1	1	1	1	1	2	1	1	1	1	1	1	3	2	1	2	1
				Early pregnancy	Maternal mental health assessment	Self-rating Anxiety Scale (SAS)	23	13 min	normal	2022-06-07 10:42:59	Finish	1	1	1	1	1	1	1	1	2	2	1	1	1	1	1	2	1	1	1	1
				Early pregnancy	Maternal mental health assessment	Self-rating Anxiety Scale (SAS)	23	11 min	normal	2022-06-07 10:59:52	Finish	1	1	1	1	1	1	1	2	1	2	1	1	1	1	1	2	1	1	1	1
				Early pregnancy	Maternal mental health assessment	Self-rating Anxiety Scale (SAS)	27	8 min	normal	2022-06-07 11:03:24	Finish	1	1	1	1	4	1	1	2	1	2	1	1	1	1	2	2	1	1	1	1
				Early pregnancy	Maternal mental health assessment	Self-rating Anxiety Scale (SAS)	32	3 min	normal	2022-06-07 11:17:14	Finish	1	1	1	1	3	1	2	2	1	1	1	1	4	1	2	1	1	1	4	2
				Late pregnancy	Maternal mental health assessment	Self-rating Anxiety Scale (SAS)	24	2 min	normal	2022-06-07 11:19:09	Finish	1	1	1	1	4	1	1	1	1	1	1	1	1	1	1	2	1	1	1	1
				Early pregnancy	Maternal mental health assessment	Self-rating Anxiety Scale (SAS)	29	2 min	normal	2022-06-07 11:36:25	Finish	1	1	1	1	4	1	2	1	1	1	1	1	4	1	1	2	2	1	1	1
				Mid-pregnancy	Maternal mental health assessment	Self-rating Anxiety Scale (SAS)	23	172 min	normal	2022-06-07 13:21:44	Finish	1	1	1	1	1	1	1	1	2	2	1	1	1	1	1	2	1	1	1	1
				Early pregnancy	Maternal mental health assessment	Self-rating Anxiety Scale (SAS)	20	1 min	normal	2022-06-07 14:14:32	Finish	1	1	1	1	1	1	1	1	1	1	1	1	1	1	1	1	1	1	1	1
				Mid-pregnancy	Maternal mental health assessment	Self-rating Anxiety Scale (SAS)	33	2 min	normal	2022-06-07 14:18:38	Finish	1	1	1	1	2	1	1	3	2	2	2	2	4	1	1	1	2	1	2	2
				Mid-pregnancy	Maternal mental health assessment	Self-rating Anxiety Scale (SAS)	23	1 min	normal	2022-06-07 14:32:08	Finish	1	1	1	1	4	1	1	1	1	1	1	1	1	1	1	1	1	1	1	1
				Late pregnancy	Maternal mental health assessment	Self-rating Anxiety Scale (SAS)	20	1 min	normal	2022-06-07 14:35:58	Finish	1	1	1	1	1	1	1	1	1	1	1	1	1	1	1	1	1	1	1	1
				3 days after delivery	Maternal mental health assessment	Self-rating Anxiety Scale (SAS)	20	1 min	normal	2022-06-07 14:38:40	Finish	1	1	1	1	1	1	1	1	1	1	1	1	1	1	1	1	1	1	1	1
				3 days after delivery	Maternal mental health assessment	Self-rating Anxiety Scale (SAS)	20	1 min	normal	2022-06-07 14:40:45	Finish	1	1	1	1	1	1	1	1	1	1	1	1	1	1	1	1	1	1	1	1
				Early pregnancy	Maternal mental health assessment	Self-rating Anxiety Scale (SAS)	27	3 min	normal	2022-06-07 14:55:42	Finish	1	1	1	1	4	1	1	1	1	2	1	1	1	1	1	3	1	2	1	1
				Early pregnancy	Maternal mental health assessment	Self-rating Anxiety Scale (SAS)	39	4 min	normal	2022-06-07 15:07:00	Finish	2	2	2	1	4	1	1	1	3	2	2	1	4	1	1	3	2	1	4	1
				Early pregnancy	Maternal mental health assessment	Self-rating Anxiety Scale (SAS)	23	2 min	normal	2022-06-07 15:26:50	Finish	1	1	1	1	4	1	1	1	1	1	1	1	1	1	1	1	1	1	1	1
				Early pregnancy	Maternal mental health assessment	Self-rating Anxiety Scale (SAS)	30	2 min	normal	2022-06-08 08:02:18	Finish	2	2	1	1	2	1	1	2	1	1	1	1	1	2	2	2	2	1	2	2
				Mid-pregnancy	Maternal mental health assessment	Self-rating Anxiety Scale (SAS)	28	8 min	normal	2022-06-08 08:13:51	Finish	1	1	1	1	4	1	1	1	1	1	1	1	4	1	1	2	1	1	2	1
				Mid-pregnancy	Maternal mental health assessment	Self-rating Anxiety Scale (SAS)	29	6 min	normal	2022-06-08 08:32:37	Finish	2	1	1	1	1	1	2	2	2	1	2	1	1	1	1	2	2	1	3	1
				Early pregnancy	Maternal mental health assessment	Self-rating Anxiety Scale (SAS)	39	9 min	normal	2022-06-08 08:43:04	Finish	2	2	2	1	2	1	2	2	2	2	2	1	4	2	1	2	4	1	2	2
				Mid-pregnancy	Maternal mental health assessment	Self-rating Anxiety Scale (SAS)	34	11 min	normal	2022-06-08 09:01:51	Finish	2	1	2	2	3	1	2	1	2	1	1	1	2	1	1	2	4	1	3	1
				Early pregnancy	Maternal mental health assessment	Self-rating Anxiety Scale (SAS)	28	1 min	normal	2022-06-08 09:05:46	Finish	1	1	1	1	4	1	1	1	2	1	1	1	2	1	1	1	2	1	3	1
				Early pregnancy	Maternal mental health assessment	Self-rating Anxiety Scale (SAS)	26	3 min	normal	2022-06-08 09:06:13	Finish	1	1	1	1	1	1	1	1	1	1	1	1	4	1	1	1	1	1	4	1
				Early pregnancy	Maternal mental health assessment	Self-rating Anxiety Scale (SAS)	30	73 min	normal	2022-06-08 09:11:27	Finish	1	1	2	1	1	1	2	2	1	2	1	1	1	1	1	2	3	2	2	2
				Mid-pregnancy	Maternal mental health assessment	Self-rating Anxiety Scale (SAS)	27	1 min	normal	2022-06-08 09:12:40	Finish	1	1	1	1	4	1	1	1	2	2	1	1	2	1	1	1	1	2	1	1
				Mid-pregnancy	Maternal mental health assessment	Self-rating Anxiety Scale (SAS)	34	2 min	normal	2022-06-08 09:22:23	Finish	1	1	1	1	4	1	1	1	4	1	1	1	2	1	1	2	4	1	4	1
				Early pregnancy	Maternal mental health assessment	Self-rating Anxiety Scale (SAS)	27	2 min	normal	2022-06-08 09:32:48	Finish	1	1	1	1	1	1	1	1	1	1	1	1	1	1	1	2	4	1	4	1
				Early pregnancy	Maternal mental health assessment	Self-rating Anxiety Scale (SAS)	35	1 min	normal	2022-06-08 09:33:11	Finish	1	1	1	1	4	1	1	1	4	1	1	1	4	1	1	1	4	1	4	1
				Early pregnancy	Maternal mental health assessment	Self-rating Anxiety Scale (SAS)	32	3 min	normal	2022-06-08 09:42:02	Finish	1	1	1	1	4	1	1	1	4	1	1	1	2	1	1	3	2	1	3	1
				Early pregnancy	Maternal mental health assessment	Self-rating Anxiety Scale (SAS)	34	19 min	normal	2022-06-08 09:45:08	Finish	3	3	1	1	2	1	1	2	2	2	1	1	1	1	2	3	2	2	2	1
				Early pregnancy	Maternal mental health assessment	Self-rating Anxiety Scale (SAS)	32	2 min	normal	2022-06-08 10:14:12	Finish	1	1	1	2	1	1	1	1	2	2	2	1	2	2	2	3	2	2	2	1
				Late pregnancy	Maternal mental health assessment	Self-rating Anxiety Scale (SAS)	29	2 min	normal	2022-06-08 10:27:02	Finish	1	1	1	1	4	1	1	1	1	1	1	1	1	1	1	4	4	1	1	1
				Early pregnancy	Maternal mental health assessment	Self-rating Anxiety Scale (SAS)	24	2 min	normal	2022-06-08 10:33:57	Finish	1	1	1	1	1	1	2	1	1	1	1	1	3	1	1	2	1	1	1	1
				Early pregnancy	Maternal mental health assessment	Self-rating Anxiety Scale (SAS)	37	4 min	normal	2022-06-08 10:45:50	Finish	2	1	2	1	4	1	1	1	3	1	1	1	4	2	1	1	4	1	3	2
				Early pregnancy	Maternal mental health assessment	Self-rating Anxiety Scale (SAS)	23	1 min	normal	2022-06-08 10:53:58	Finish	1	1	1	1	1	1	1	1	1	1	1	1	1	1	1	2	1	1	2	2
				Early pregnancy	Maternal mental health assessment	Self-rating Anxiety Scale (SAS)	27	4 min	normal	2022-06-08 10:58:58	Finish	1	1	1	1	2	1	1	1	2	1	1	1	2	1	1	1	4	1	2	1
				Early pregnancy	Maternal mental health assessment	Self-rating Anxiety Scale (SAS)	32	2 min	normal	2022-06-08 10:59:40	Finish	1	1	2	1	2	1	1	2	2	1	2	1	1	1	2	2	4	1	2	2
				Mid-pregnancy	Maternal mental health assessment	Self-rating Anxiety Scale (SAS)	40	3 min	normal	2022-06-08 11:04:35	Finish	1	1	1	1	4	1	1	3	4	1	1	2	1	1	1	3	4	1	4	4
				Early pregnancy	Maternal mental health assessment	Self-rating Anxiety Scale (SAS)	33	2 min	normal	2022-06-08 11:05:27	Finish	1	1	1	1	4	1	2	2	2	1	1	1	1	1	1	4	1	2	4	1
				Early pregnancy	Maternal mental health assessment	Self-rating Anxiety Scale (SAS)	29	1 min	normal	2022-06-08 11:12:50	Finish	1	1	1	1	3	1	1	1	2	1	1	1	1	1	2	1	4	2	2	1
				Early pregnancy	Maternal mental health assessment	Self-rating Anxiety Scale (SAS)	28	2 min	normal	2022-06-08 11:15:57	Finish	1	1	1	1	4	1	1	1	2	1	1	1	1	1	1	1	4	1	2	1
				Mid-pregnancy	Maternal mental health assessment	Self-rating Anxiety Scale (SAS)	30	2 min	normal	2022-06-08 11:36:11	Finish	1	1	1	1	2	1	1	1	4	1	1	1	2	1	1	3	2	1	3	1
				Mid-pregnancy	Maternal mental health assessment	Self-rating Anxiety Scale (SAS)	33	2 min	normal	2022-06-08 13:37:28	Finish	2	1	1	1	4	1	2	2	2	1	2	1	1	1	3	4	1	1	1	1
				Early pregnancy	Maternal mental health assessment	Self-rating Anxiety Scale (SAS)	32	2 min	normal	2022-06-08 13:54:15	Finish	1	1	3	2	2	1	1	1	2	1	1	1	2	1	3	2	2	1	2	2
				Early pregnancy	Maternal mental health assessment	Self-rating Anxiety Scale (SAS)	5	35 min	normal	2022-06-08 14:15:35	Finish	--	--	--	--	--	--	--	--	--	--	--	--	--	--	--	--	--	--	3	2
				Early pregnancy	Maternal mental health assessment	Self-rating Anxiety Scale (SAS)	33	2 min	normal	2022-06-08 14:19:23	Finish	1	1	1	2	3	1	1	3	2	2	2	2	2	1	2	1	1	1	2	2
				Early pregnancy	Maternal mental health assessment	Self-rating Anxiety Scale (SAS)	47	2 min	mild	2022-06-08 14:23:05	Finish	3	2	3	3	3	1	2	3	3	2	2	2	1	2	4	3	2	2	3	1
				Early pregnancy	Maternal mental health assessment	Self-rating Anxiety Scale (SAS)	38	2 min	normal	2022-06-08 14:23:45	Finish	2	2	2	1	2	2	2	1	2	2	2	1	2	1	1	3	3	2	3	2
				Early pregnancy	Maternal mental health assessment	Self-rating Anxiety Scale (SAS)	28	2 min	normal	2022-06-08 14:53:50	Finish	1	1	1	1	2	1	1	1	2	2	1	1	2	1	1	2	2	2	2	1
				Early pregnancy	Maternal mental health assessment	Self-rating Anxiety Scale (SAS)	29	120 min	normal	2022-06-08 14:59:34	Finish	1	1	1	1	1	1	2	2	1	1	2	1	2	1	1	3	1	2	3	1
				Early pregnancy	Maternal mental health assessment	Self-rating Anxiety Scale (SAS)	25	2 min	normal	2022-06-08 15:02:40	Finish	1	1	1	1	4	1	1	1	1	1	1	1	1	1	1	2	2	1	1	1
				Mid-pregnancy	Maternal mental health assessment	Self-rating Anxiety Scale (SAS)	29	65 min	normal	2022-06-08 15:29:00	Finish	2	1	1	1	2	1	1	1	1	1	1	1	1	1	2	3	2	2	2	2
				Mid-pregnancy	Maternal mental health assessment	Self-rating Anxiety Scale (SAS)	25	2 min	normal	2022-06-09 07:49:41	Finish	1	1	1	1	1	2	1	1	1	1	2	2	1	1	1	2	2	1	1	1
				Early pregnancy	Maternal mental health assessment	Self-rating Anxiety Scale (SAS)	23	2 min	normal	2022-06-09 08:42:52	Finish	1	1	1	1	4	1	1	1	1	1	1	1	1	1	1	1	1	1	1	1
				Early pregnancy	Maternal mental health assessment	Self-rating Anxiety Scale (SAS)	32	2 min	normal	2022-06-09 08:48:35	Finish	1	1	1	1	2	1	1	2	2	1	1	1	4	1	2	2	2	2	2	2
				Early pregnancy	Maternal mental health assessment	Self-rating Anxiety Scale (SAS)	25	2 min	normal	2022-06-09 08:52:26	Finish	2	1	2	1	1	1	1	1	2	1	1	1	1	1	1	2	2	1	1	1
				Mid-pregnancy	Maternal mental health assessment	Self-rating Anxiety Scale (SAS)	25	3 min	normal	2022-06-09 09:09:34	Finish	1	1	1	1	4	1	1	1	1	1	1	1	1	1	1	2	1	1	2	1
				Early pregnancy	Maternal mental health assessment	Self-rating Anxiety Scale (SAS)	28	16 min	normal	2022-06-09 09:19:49	Finish	1	1	1	1	4	1	1	1	2	1	1	1	2	1	1	2	2	1	2	1
				Early pregnancy	Maternal mental health assessment	Self-rating Anxiety Scale (SAS)	30	2 min	normal	2022-06-09 09:24:13	Finish	1	1	1	1	1	1	1	2	2	1	1	1	1	1	2	3	4	1	3	1
				Early pregnancy	Maternal mental health assessment	Self-rating Anxiety Scale (SAS)	23	2 min	normal	2022-06-09 09:30:04	Finish	1	1	1	1	1	1	1	2	1	1	1	1	1	1	2	2	1	1	1	1
				Early pregnancy	Maternal mental health assessment	Self-rating Anxiety Scale (SAS)	25	2 min	normal	2022-06-09 09:31:53	Finish	1	1	1	1	2	1	1	2	2	1	1	1	1	1	1	1	3	1	1	1
				Early pregnancy	Maternal mental health assessment	Self-rating Anxiety Scale (SAS)	40	2 min	normal	2022-06-09 09:34:10	Finish	2	2	2	2	2	2	2	3	2	2	2	2	2	1	1	3	2	2	3	1
				Early pregnancy	Maternal mental health assessment	Self-rating Anxiety Scale (SAS)	38	2 min	normal	2022-06-09 09:36:55	Finish	1	2	1	1	3	1	1	2	4	2	1	1	4	1	2	2	3	2	2	2
				Mid-pregnancy	Maternal mental health assessment	Self-rating Anxiety Scale (SAS)	28	3 min	normal	2022-06-09 09:42:43	Finish	1	1	1	1	2	1	1	2	2	2	1	1	1	1	1	2	2	1	2	2
				Early pregnancy	Maternal mental health assessment	Self-rating Anxiety Scale (SAS)	39	3 min	normal	2022-06-09 09:51:16	Finish	3	1	1	1	3	2	2	3	2	3	2	1	2	1	1	3	2	1	3	2
				Early pregnancy	Maternal mental health assessment	Self-rating Anxiety Scale (SAS)	32	5 min	normal	2022-06-09 09:54:59	Finish	1	2	2	1	4	1	1	1	2	1	1	1	2	1	1	3	2	2	2	1
				Early pregnancy	Maternal mental health assessment	Self-rating Anxiety Scale (SAS)	24	2 min	normal	2022-06-09 10:11:48	Finish	1	1	1	1	1	1	2	2	2	1	1	1	1	1	1	1	1	1	2	1
				Early pregnancy	Maternal mental health assessment	Self-rating Anxiety Scale (SAS)	20	1 min	normal	2022-06-09 10:14:05	Finish	1	1	1	1	1	1	1	1	1	1	1	1	1	1	1	1	1	1	1	1
				Early pregnancy	Maternal mental health assessment	Self-rating Anxiety Scale (SAS)	32	2 min	normal	2022-06-09 10:15:20	Finish	1	1	1	2	4	1	1	2	2	1	1	1	4	1	2	1	2	1	2	1
				Early pregnancy	Maternal mental health assessment	Self-rating Anxiety Scale (SAS)	29	5 min	normal	2022-06-09 10:21:32	Finish	1	1	1	1	1	1	2	2	1	2	2	1	1	1	2	1	4	2	1	1
				Early pregnancy	Maternal mental health assessment	Self-rating Anxiety Scale (SAS)	50	2 min	mild	2022-06-09 10:24:12	Finish	2	2	2	2	4	2	2	3	4	2	2	2	4	1	2	3	4	1	4	2
				Early pregnancy	Maternal mental health assessment	Self-rating Anxiety Scale (SAS)	25	2 min	normal	2022-06-09 10:26:20	Finish	1	1	1	1	1	1	1	1	1	1	1	1	1	1	1	2	4	1	2	1
				Early pregnancy	Maternal mental health assessment	Self-rating Anxiety Scale (SAS)	23	2 min	normal	2022-06-09 10:33:12	Finish	1	1	1	1	4	1	1	1	1	1	1	1	1	1	1	1	1	1	1	1
				Early pregnancy	Maternal mental health assessment	Self-rating Anxiety Scale (SAS)	36	2 min	normal	2022-06-09 10:36:45	Finish	1	1	1	1	4	1	1	2	4	1	1	2	4	1	1	3	2	2	2	1
				Mid-pregnancy	Maternal mental health assessment	Self-rating Anxiety Scale (SAS)	52	4 min	中度	2022-06-09 10:43:03	Finish	3	2	3	2	4	2	3	3	3	2	3	2	2	2	2	3	3	2	4	2
				Late pregnancy	Maternal mental health assessment	Self-rating Anxiety Scale (SAS)	32	2 min	normal	2022-06-09 10:49:24	Finish	1	1	1	1	4	1	1	2	2	1	1	1	2	1	2	3	2	1	2	2
				Early pregnancy	Maternal mental health assessment	Self-rating Anxiety Scale (SAS)	21	2 min	normal	2022-06-09 10:54:36	Finish	1	1	1	1	1	1	1	1	1	1	1	1	1	1	1	2	1	1	1	1
				Mid-pregnancy	Maternal mental health assessment	Self-rating Anxiety Scale (SAS)	44	21 min	mild	2022-06-09 10:57:33	Finish	3	1	2	1	4	1	1	3	3	3	2	1	3	1	3	3	3	1	3	2
				Mid-pregnancy	Maternal mental health assessment	Self-rating Anxiety Scale (SAS)	31	2 min	normal	2022-06-09 11:01:03	Finish	2	1	1	1	2	1	1	1	2	1	1	1	4	1	1	3	2	1	2	2
				Early pregnancy	Maternal mental health assessment	Self-rating Anxiety Scale (SAS)	33	98 min	normal	2022-06-09 11:05:02	Finish	1	1	1	1	4	1	1	1	2	1	1	1	4	1	1	3	4	1	2	1
				Early pregnancy	Maternal mental health assessment	Self-rating Anxiety Scale (SAS)	35	21 min	normal	2022-06-09 11:21:01	Finish	2	2	2	2	3	1	1	1	2	1	1	1	2	1	1	3	2	1	4	2
				Early pregnancy	Maternal mental health assessment	Self-rating Anxiety Scale (SAS)	25	36 min	normal	2022-06-09 12:19:29	Finish	2	1	1	1	2	1	1	1	2	1	1	1	1	1	1	2	1	1	1	2
				Early pregnancy	Maternal mental health assessment	Self-rating Anxiety Scale (SAS)	33	6 min	normal	2022-06-09 14:06:11	Finish	1	1	1	1	3	1	1	2	3	1	1	1	1	1	1	3	2	1	4	3
				Mid-pregnancy	Maternal mental health assessment	Self-rating Anxiety Scale (SAS)	42	1 min	normal	2022-06-09 14:09:20	Finish	2	2	2	2	3	2	2	2	3	2	2	2	3	1	1	2	3	1	3	2
				Early pregnancy	Maternal mental health assessment	Self-rating Anxiety Scale (SAS)	27	1 min	normal	2022-06-09 14:12:50	Finish	1	1	1	1	1	1	1	1	2	1	1	1	1	1	2	3	4	1	1	1
				Mid-pregnancy	Maternal mental health assessment	Self-rating Anxiety Scale (SAS)	37	3 min	normal	2022-06-09 14:25:05	Finish	2	2	2	1	4	1	1	2	3	1	1	1	4	1	1	3	2	1	2	2
				Mid-pregnancy	Maternal mental health assessment	Self-rating Anxiety Scale (SAS)	37	191 min	normal	2022-06-09 14:26:13	Finish	2	1	2	1	3	1	1	1	3	2	1	1	4	1	1	2	4	1	3	2
				Early pregnancy	Maternal mental health assessment	Self-rating Anxiety Scale (SAS)	24	2 min	normal	2022-06-09 14:52:42	Finish	1	1	1	1	1	1	2	2	2	1	1	1	1	1	1	1	1	1	1	2
				Early pregnancy	Maternal mental health assessment	Self-rating Anxiety Scale (SAS)	28	2 min	normal	2022-06-09 14:55:10	Finish	2	1	2	1	2	1	1	1	2	1	1	1	1	1	1	3	2	1	2	1
				Early pregnancy	Maternal mental health assessment	Self-rating Anxiety Scale (SAS)	35	2 min	normal	2022-06-09 15:19:48	Finish	1	1	1	1	4	1	1	2	3	1	1	1	3	2	1	3	2	2	3	1
				Early pregnancy	Maternal mental health assessment	Self-rating Anxiety Scale (SAS)	31	2 min	normal	2022-06-09 16:01:09	Finish	2	1	1	1	1	1	3	3	1	2	1	1	1	1	1	4	1	1	2	2
				Early pregnancy	Maternal mental health assessment	Self-rating Anxiety Scale (SAS)	28	3 min	normal	2022-06-09 16:06:41	Finish	1	1	1	1	4	1	1	1	1	1	1	1	4	1	1	2	2	1	1	1
				Mid-pregnancy	Maternal mental health assessment	Self-rating Anxiety Scale (SAS)	32	2 min	normal	2022-06-09 16:12:43	Finish	1	1	1	1	3	1	1	1	2	1	1	1	4	1	1	3	4	1	2	1
				Mid-pregnancy	Maternal mental health assessment	Self-rating Anxiety Scale (SAS)	26	2 min	normal	2022-06-09 16:20:25	Finish	1	1	1	1	2	1	1	1	4	1	1	1	1	1	1	3	1	1	1	1
				Early pregnancy	Maternal mental health assessment	Self-rating Anxiety Scale (SAS)	34	1 min	normal	2022-06-10 07:54:58	Finish	1	1	1	1	4	1	1	1	4	1	1	1	4	1	1	1	4	1	3	1
				Early pregnancy	Maternal mental health assessment	Self-rating Anxiety Scale (SAS)	38	3 min	normal	2022-06-10 08:30:42	Finish	2	2	2	1	3	2	1	2	2	4	2	1	2	1	1	2	2	2	2	2
				Early pregnancy	Maternal mental health assessment	Self-rating Anxiety Scale (SAS)	31	2 min	normal	2022-06-10 09:22:22	Finish	1	1	1	1	4	1	1	1	4	1	1	1	4	1	1	2	2	1	1	1
				Early pregnancy	Maternal mental health assessment	Self-rating Anxiety Scale (SAS)	34	2 min	normal	2022-06-10 09:23:18	Finish	2	2	2	1	2	1	2	2	3	1	3	1	1	1	1	2	2	1	3	1
				Early pregnancy	Maternal mental health assessment	Self-rating Anxiety Scale (SAS)	32	10 min	normal	2022-06-10 09:25:50	Finish	1	1	1	1	4	1	1	1	3	2	1	1	1	1	2	3	2	1	3	1
				Early pregnancy	Maternal mental health assessment	Self-rating Anxiety Scale (SAS)	46	17 min	mild	2022-06-10 09:37:36	Finish	2	2	2	1	4	2	3	3	3	2	2	2	2	2	3	3	2	1	3	2
				Early pregnancy	Maternal mental health assessment	Self-rating Anxiety Scale (SAS)	26	2 min	normal	2022-06-10 09:42:23	Finish	1	1	1	1	1	1	1	1	2	1	1	1	2	1	1	3	2	1	2	1
				Early pregnancy	Maternal mental health assessment	Self-rating Anxiety Scale (SAS)	26	2 min	normal	2022-06-10 09:42:36	Finish	1	1	1	1	1	1	1	2	2	1	1	1	1	1	2	2	1	2	2	1
				Early pregnancy	Maternal mental health assessment	Self-rating Anxiety Scale (SAS)	36	2 min	normal	2022-06-10 09:44:17	Finish	2	2	2	1	4	1	1	1	2	2	1	1	2	1	2	3	2	2	2	2
				Mid-pregnancy	Maternal mental health assessment	Self-rating Anxiety Scale (SAS)	33	2 min	normal	2022-06-10 09:46:43	Finish	1	2	2	1	4	1	1	1	2	1	1	1	2	1	2	3	3	1	2	1
				Early pregnancy	Maternal mental health assessment	Self-rating Anxiety Scale (SAS)	33	1 min	normal	2022-06-10 09:51:27	Finish	2	1	1	1	3	1	1	1	4	2	1	1	3	1	1	2	3	1	2	1
				Early pregnancy	Maternal mental health assessment	Self-rating Anxiety Scale (SAS)	33	1 min	normal	2022-06-10 09:59:08	Finish	2	1	1	1	1	1	1	2	1	1	2	2	4	1	1	2	3	2	3	1
				Early pregnancy	Maternal mental health assessment	Self-rating Anxiety Scale (SAS)	31	2 min	normal	2022-06-10 10:00:41	Finish	1	1	1	1	2	1	1	2	2	1	1	1	2	1	3	3	3	1	2	1
				Early pregnancy	Maternal mental health assessment	Self-rating Anxiety Scale (SAS)	40	2 min	normal	2022-06-10 10:11:17	Finish	2	1	1	1	3	1	3	2	3	3	1	1	2	1	1	3	4	2	2	3
				Early pregnancy	Maternal mental health assessment	Self-rating Anxiety Scale (SAS)	38	2 min	normal	2022-06-10 10:15:12	Finish	2	2	2	2	2	1	1	3	2	2	1	1	2	1	2	3	2	2	3	2
				Early pregnancy	Maternal mental health assessment	Self-rating Anxiety Scale (SAS)	45	1 min	mild	2022-06-10 10:17:03	Finish	2	2	2	2	3	2	2	2	3	2	2	2	3	2	2	2	3	2	3	2
				Early pregnancy	Maternal mental health assessment	Self-rating Anxiety Scale (SAS)	25	31 min	normal	2022-06-10 10:17:41	Finish	1	1	1	1	1	1	1	1	2	1	1	1	1	1	1	3	2	2	1	1
				Early pregnancy	Maternal mental health assessment	Self-rating Anxiety Scale (SAS)	26	1 min	normal	2022-06-10 10:17:58	Finish	1	1	1	1	1	1	1	2	1	1	1	1	4	1	1	2	1	1	2	1
				Early pregnancy	Maternal mental health assessment	Self-rating Anxiety Scale (SAS)	44	2 min	mild	2022-06-10 10:22:37	Finish	2	2	2	1	4	2	1	3	2	4	1	2	3	1	3	4	2	1	3	1
				Early pregnancy	Maternal mental health assessment	Self-rating Anxiety Scale (SAS)	35	2 min	normal	2022-06-10 10:40:23	Finish	2	2	2	2	2	1	1	2	2	2	2	2	2	1	1	1	2	1	2	3
				Early pregnancy	Maternal mental health assessment	Self-rating Anxiety Scale (SAS)	41	2 min	normal	2022-06-10 10:41:28	Finish	1	1	1	2	4	1	1	2	3	2	1	1	2	2	4	3	3	1	4	2
				Early pregnancy	Maternal mental health assessment	Self-rating Anxiety Scale (SAS)	39	2 min	normal	2022-06-10 10:44:06	Finish	2	2	1	1	3	2	1	2	2	3	2	1	1	1	1	3	4	1	3	3
				Early pregnancy	Maternal mental health assessment	Self-rating Anxiety Scale (SAS)	38	1 min	normal	2022-06-10 11:01:33	Finish	1	2	2	1	4	1	1	1	4	2	1	1	4	1	1	2	3	1	4	1
				Early pregnancy	Maternal mental health assessment	Self-rating Anxiety Scale (SAS)	30	2 min	normal	2022-06-10 11:04:43	Finish	1	1	1	1	1	1	2	1	2	2	1	1	4	1	2	2	2	1	2	1
				Early pregnancy	Maternal mental health assessment	Self-rating Anxiety Scale (SAS)	33	2 min	normal	2022-06-10 11:04:58	Finish	2	1	1	1	4	2	1	1	2	2	1	1	1	1	2	2	4	1	2	1
				Early pregnancy	Maternal mental health assessment	Self-rating Anxiety Scale (SAS)	20	2 min	normal	2022-06-10 11:15:28	Finish	1	1	1	1	1	1	1	1	1	1	1	1	1	1	1	1	1	1	1	1
				Early pregnancy	Maternal mental health assessment	Self-rating Anxiety Scale (SAS)	31	2 min	normal	2022-06-10 11:20:09	Finish	2	2	1	1	4	1	1	1	1	1	1	1	4	1	1	1	2	1	2	2
				Early pregnancy	Maternal mental health assessment	Self-rating Anxiety Scale (SAS)	31	2 min	normal	2022-06-10 11:20:39	Finish	1	1	1	1	2	1	1	2	2	2	1	1	4	1	1	3	2	1	2	1
				Early pregnancy	Maternal mental health assessment	Self-rating Anxiety Scale (SAS)	23	2 min	normal	2022-06-10 13:38:23	Finish	1	1	1	1	2	1	1	1	1	1	1	1	1	1	2	1	2	1	1	1
				Mid-pregnancy	Maternal mental health assessment	Self-rating Anxiety Scale (SAS)	39	3 min	normal	2022-06-10 13:46:03	Finish	1	1	1	1	3	1	2	2	2	3	1	2	2	1	3	3	2	2	4	2
				Mid-pregnancy	Maternal mental health assessment	Self-rating Anxiety Scale (SAS)	24	2 min	normal	2022-06-10 13:59:01	Finish	1	1	1	1	1	1	1	2	1	1	1	1	4	1	1	1	1	1	1	1
				Early pregnancy	Maternal mental health assessment	Self-rating Anxiety Scale (SAS)	43	2 min	mild	2022-06-10 14:12:07	Finish	2	2	3	2	3	1	2	2	3	2	1	2	3	1	2	2	4	1	3	2
				Early pregnancy	Maternal mental health assessment	Self-rating Anxiety Scale (SAS)	36	2 min	normal	2022-06-10 14:18:10	Finish	1	1	1	1	4	1	1	1	4	1	1	1	4	1	1	2	4	1	4	1
				Early pregnancy	Maternal mental health assessment	Self-rating Anxiety Scale (SAS)	23	2 min	normal	2022-06-10 14:20:53	Finish	1	1	1	1	1	1	1	1	1	1	1	1	1	1	2	1	3	1	1	1
				Early pregnancy	Maternal mental health assessment	Self-rating Anxiety Scale (SAS)	27	1 min	normal	2022-06-10 14:38:31	Finish	2	1	1	1	2	1	1	1	1	1	1	1	4	1	1	2	1	1	2	1
				Early pregnancy	Maternal mental health assessment	Self-rating Anxiety Scale (SAS)	32	2 min	normal	2022-06-10 14:46:45	Finish	1	1	1	1	1	1	1	1	4	1	1	1	4	1	1	3	4	1	2	1
				Early pregnancy	Maternal mental health assessment	Self-rating Anxiety Scale (SAS)	28	2 min	normal	2022-06-10 15:16:04	Finish	2	1	1	1	1	1	1	1	1	1	1	1	1	3	2	3	2	1	2	1
				Early pregnancy	Maternal mental health assessment	Self-rating Anxiety Scale (SAS)	35	1 min	normal	2022-06-10 15:17:35	Finish	1	1	1	1	4	1	1	1	4	1	1	1	4	1	1	1	4	1	4	1
				Early pregnancy	Maternal mental health assessment	Self-rating Anxiety Scale (SAS)	29	15 min	normal	2022-06-10 15:18:38	Finish	1	1	1	1	3	1	1	1	2	1	1	1	2	1	1	2	2	2	3	1
				Late pregnancy	Maternal mental health assessment	Self-rating Anxiety Scale (SAS)	23	2 min	normal	2022-06-10 15:39:57	Finish	1	1	1	1	1	1	1	1	1	1	1	1	2	1	1	2	1	1	2	1
				Mid-pregnancy	Maternal mental health assessment	Self-rating Anxiety Scale (SAS)	35	39 min	normal	2022-06-10 16:09:09	Finish	1	1	2	1	3	1	1	1	3	2	1	1	4	1	1	3	2	1	3	2
				Early pregnancy	Maternal mental health assessment	Self-rating Anxiety Scale (SAS)	33	2 min	normal	2022-06-13 08:01:48	Finish	2	1	2	1	1	1	1	3	3	1	1	1	1	1	2	3	1	3	3	1
				Early pregnancy	Maternal mental health assessment	Self-rating Anxiety Scale (SAS)	32	2 min	normal	2022-06-13 08:08:55	Finish	1	1	1	1	4	1	1	1	4	1	1	1	3	1	2	1	2	1	3	1
				Early pregnancy	Maternal mental health assessment	Self-rating Anxiety Scale (SAS)	21	2 min	normal	2022-06-13 08:13:42	Finish	1	1	1	1	1	1	1	1	1	1	1	1	1	1	2	1	1	1	1	1
				Early pregnancy	Maternal mental health assessment	Self-rating Anxiety Scale (SAS)	29	2 min	normal	2022-06-13 08:28:11	Finish	1	1	1	1	4	1	1	1	1	1	1	1	1	1	3	2	2	1	2	2
				Mid-pregnancy	Maternal mental health assessment	Self-rating Anxiety Scale (SAS)	24	2 min	normal	2022-06-13 08:45:39	Finish	1	1	1	1	1	1	1	1	1	1	1	1	1	1	1	2	3	1	2	1
				Mid-pregnancy	Maternal mental health assessment	Self-rating Anxiety Scale (SAS)	30	3 min	normal	2022-06-13 08:46:49	Finish	2	1	1	1	3	1	2	1	2	2	1	1	1	1	1	2	3	1	2	1
				Early pregnancy	Maternal mental health assessment	Self-rating Anxiety Scale (SAS)	33	1 min	normal	2022-06-13 08:55:47	Finish	1	1	1	1	4	1	1	1	4	1	1	1	2	1	1	3	4	1	2	1
				Early pregnancy	Maternal mental health assessment	Self-rating Anxiety Scale (SAS)	36	3 min	normal	2022-06-13 08:57:09	Finish	1	1	1	1	4	1	1	1	4	1	1	1	4	1	2	2	4	1	3	1
				Early pregnancy	Maternal mental health assessment	Self-rating Anxiety Scale (SAS)	26	1 min	normal	2022-06-13 09:01:10	Finish	1	1	1	1	1	1	1	1	1	1	1	1	4	1	1	2	3	1	1	1
				Mid-pregnancy	Maternal mental health assessment	Self-rating Anxiety Scale (SAS)	27	2 min	normal	2022-06-13 09:08:58	Finish	1	1	1	1	2	1	1	1	3	2	1	1	2	1	1	1	2	1	2	1
				Early pregnancy	Maternal mental health assessment	Self-rating Anxiety Scale (SAS)	37	4 min	normal	2022-06-13 09:17:34	Finish	2	1	2	1	3	1	1	2	2	1	2	2	4	1	1	3	1	2	3	2
				Early pregnancy	Maternal mental health assessment	Self-rating Anxiety Scale (SAS)	32	2 min	normal	2022-06-13 09:19:24	Finish	1	1	1	1	1	1	1	3	2	1	1	1	2	1	3	4	1	1	3	2
				Early pregnancy	Maternal mental health assessment	Self-rating Anxiety Scale (SAS)	29	2 min	normal	2022-06-13 09:23:53	Finish	2	2	1	1	3	1	1	2	1	1	1	1	1	1	2	2	1	2	2	1
				Early pregnancy	Maternal mental health assessment	Self-rating Anxiety Scale (SAS)	21	2 min	normal	2022-06-13 09:26:35	Finish	1	1	1	1	1	1	1	1	1	1	1	1	1	1	1	2	1	1	1	1
				Early pregnancy	Maternal mental health assessment	Self-rating Anxiety Scale (SAS)	29	1 min	normal	2022-06-13 09:31:18	Finish	1	1	1	1	4	1	1	1	2	1	1	1	2	1	1	3	2	1	2	1
				Early pregnancy	Maternal mental health assessment	Self-rating Anxiety Scale (SAS)	33	2 min	normal	2022-06-13 09:56:06	Finish	1	1	1	1	4	1	1	1	4	1	1	1	4	1	1	2	2	1	2	2
				Early pregnancy	Maternal mental health assessment	Self-rating Anxiety Scale (SAS)	38	2 min	normal	2022-06-13 09:58:01	Finish	3	2	2	1	3	1	1	3	3	1	2	2	1	1	1	3	2	1	3	2
				Early pregnancy	Maternal mental health assessment	Self-rating Anxiety Scale (SAS)	35	1 min	normal	2022-06-13 10:00:20	Finish	1	1	1	1	4	1	1	1	4	1	1	1	4	1	1	1	4	1	4	1
				Late pregnancy	Maternal mental health assessment	Self-rating Anxiety Scale (SAS)	29	2 min	normal	2022-06-13 10:03:51	Finish	1	1	2	1	1	1	1	2	1	2	2	2	1	1	3	1	1	1	2	2
				Mid-pregnancy	Maternal mental health assessment	Self-rating Anxiety Scale (SAS)	34	2 min	normal	2022-06-13 10:17:01	Finish	1	1	1	1	3	1	2	1	4	1	1	1	3	1	1	1	4	2	3	1
				Early pregnancy	Maternal mental health assessment	Self-rating Anxiety Scale (SAS)	28	2 min	normal	2022-06-13 10:27:11	Finish	1	1	1	1	4	1	1	2	2	1	2	1	2	1	2	1	1	1	1	1
				Mid-pregnancy	Maternal mental health assessment	Self-rating Anxiety Scale (SAS)	23	1 min	normal	2022-06-13 10:37:14	Finish	1	1	1	1	1	1	1	1	1	1	1	1	1	1	1	1	4	1	1	1
				Early pregnancy	Maternal mental health assessment	Self-rating Anxiety Scale (SAS)	44	2 min	mild	2022-06-13 10:40:13	Finish	2	2	2	1	4	1	2	2	4	2	2	2	2	1	2	2	4	2	3	2
				Early pregnancy	Maternal mental health assessment	Self-rating Anxiety Scale (SAS)	22	7 min	normal	2022-06-13 10:48:40	Finish	1	1	1	1	1	1	1	1	1	1	1	1	1	1	1	2	2	1	1	1
				Early pregnancy	Maternal mental health assessment	Self-rating Anxiety Scale (SAS)	33	1 min	normal	2022-06-13 10:54:25	Finish	2	1	2	1	2	1	2	1	2	1	1	1	4	1	1	3	2	1	2	2
				Early pregnancy	Maternal mental health assessment	Self-rating Anxiety Scale (SAS)	32	2 min	normal	2022-06-13 10:55:53	Finish	1	1	1	1	2	2	2	1	1	1	1	1	4	1	2	2	2	2	3	1
				Early pregnancy	Maternal mental health assessment	Self-rating Anxiety Scale (SAS)	25	3 min	normal	2022-06-13 10:56:35	Finish	1	1	1	1	4	1	1	1	1	1	1	1	1	1	1	2	1	1	1	2
				Early pregnancy	Maternal mental health assessment	Self-rating Anxiety Scale (SAS)	40	1 min	normal	2022-06-13 11:06:21	Finish	2	1	1	1	4	2	2	2	2	2	2	2	4	2	1	3	3	1	1	2
				Early pregnancy	Maternal mental health assessment	Self-rating Anxiety Scale (SAS)	28	2 min	normal	2022-06-13 11:17:52	Finish	1	1	1	1	1	1	1	3	1	2	1	1	1	1	2	3	2	1	2	1
				Mid-pregnancy	Maternal mental health assessment	Self-rating Anxiety Scale (SAS)	25	2 min	normal	2022-06-13 11:25:41	Finish	1	1	1	1	1	1	2	1	1	2	1	2	1	1	1	2	1	1	1	2
				Early pregnancy	Maternal mental health assessment	Self-rating Anxiety Scale (SAS)	34	2 min	normal	2022-06-13 11:29:53	Finish	2	2	2	2	3	1	2	3	3	1	1	1	2	1	2	1	1	1	2	1
				Early pregnancy	Maternal mental health assessment	Self-rating Anxiety Scale (SAS)	44	1 min	mild	2022-06-13 11:34:21	Finish	2	2	2	2	3	1	2	2	3	2	2	2	3	2	2	3	3	2	2	2
				Mid-pregnancy	Maternal mental health assessment	Self-rating Anxiety Scale (SAS)	31	3 min	normal	2022-06-13 11:41:03	Finish	1	1	2	1	1	1	1	1	2	2	1	1	3	1	1	2	3	2	2	2
				Early pregnancy	Maternal mental health assessment	Self-rating Anxiety Scale (SAS)	44	2 min	mild	2022-06-13 13:50:18	Finish	2	2	2	1	2	4	2	2	3	2	2	2	1	2	2	4	1	2	3	3
				Early pregnancy	Maternal mental health assessment	Self-rating Anxiety Scale (SAS)	28	2 min	normal	2022-06-13 13:50:31	Finish	2	1	1	1	2	1	2	3	2	1	1	1	1	1	1	3	1	1	1	1
				Early pregnancy	Maternal mental health assessment	Self-rating Anxiety Scale (SAS)	36	18 min	normal	2022-06-13 13:57:39	Finish	2	1	1	1	2	1	2	2	1	2	2	1	4	1	2	3	2	2	3	1
				Early pregnancy	Maternal mental health assessment	Self-rating Anxiety Scale (SAS)	32	6 min	normal	2022-06-13 14:27:14	Finish	2	1	2	1	4	1	1	1	4	1	1	1	3	1	1	3	1	1	1	1
				Early pregnancy	Maternal mental health assessment	Self-rating Anxiety Scale (SAS)	35	1 min	normal	2022-06-13 14:31:55	Finish	1	1	1	1	4	1	1	1	4	1	1	1	4	1	1	1	4	1	4	1
				Early pregnancy	Maternal mental health assessment	Self-rating Anxiety Scale (SAS)	30	2 min	normal	2022-06-13 14:35:33	Finish	1	1	1	1	2	1	2	2	2	2	1	1	1	1	2	2	2	1	2	2
				Early pregnancy	Maternal mental health assessment	Self-rating Anxiety Scale (SAS)	35	1 min	normal	2022-06-13 14:35:53	Finish	1	1	1	1	4	1	1	1	4	1	1	1	4	1	1	1	4	1	4	1
				Early pregnancy	Maternal mental health assessment	Self-rating Anxiety Scale (SAS)	35	2 min	normal	2022-06-13 14:48:29	Finish	1	1	1	1	2	1	1	1	2	3	3	1	4	1	1	2	4	1	3	1
				Early pregnancy	Maternal mental health assessment	Self-rating Anxiety Scale (SAS)	35	3 min	normal	2022-06-13 14:55:33	Finish	1	1	2	1	4	1	1	2	2	2	1	2	3	1	2	2	3	1	2	1
				Early pregnancy	Maternal mental health assessment	Self-rating Anxiety Scale (SAS)	32	4 min	normal	2022-06-13 14:58:34	Finish	2	1	1	1	2	1	1	2	3	2	1	1	2	1	1	3	2	2	2	1
				Early pregnancy	Maternal mental health assessment	Self-rating Anxiety Scale (SAS)	30	2 min	normal	2022-06-13 15:13:32	Finish	1	1	1	1	4	1	1	1	1	1	1	1	1	1	2	1	4	1	4	1
				Early pregnancy	Maternal mental health assessment	Self-rating Anxiety Scale (SAS)	36	9 min	normal	2022-06-13 15:55:13	Finish	1	2	1	1	4	1	1	1	4	1	1	1	4	1	1	1	4	1	4	1
				Early pregnancy	Maternal mental health assessment	Self-rating Anxiety Scale (SAS)	31	2 min	normal	2022-06-14 07:55:13	Finish	2	1	1	1	1	1	1	3	2	1	2	1	3	1	2	3	1	1	2	1
				Early pregnancy	Maternal mental health assessment	Self-rating Anxiety Scale (SAS)	35	1 min	normal	2022-06-14 07:55:34	Finish	1	1	1	1	4	1	1	1	4	1	1	1	4	1	1	1	4	1	4	1
				Early pregnancy	Maternal mental health assessment	Self-rating Anxiety Scale (SAS)	34	2 min	normal	2022-06-14 08:04:17	Finish	2	1	1	1	4	1	1	2	3	1	1	2	3	1	3	1	1	1	2	2
				Early pregnancy	Maternal mental health assessment	Self-rating Anxiety Scale (SAS)	26	2 min	normal	2022-06-14 08:04:40	Finish	1	1	1	1	4	1	1	1	1	1	1	1	1	1	1	2	1	1	2	2
				Early pregnancy	Maternal mental health assessment	Self-rating Anxiety Scale (SAS)	39	2 min	normal	2022-06-14 08:04:50	Finish	2	2	2	1	3	1	2	2	1	2	2	2	1	2	2	3	3	2	2	2
				Early pregnancy	Maternal mental health assessment	Self-rating Anxiety Scale (SAS)	38	2 min	normal	2022-06-14 08:15:38	Finish	2	1	1	1	2	1	1	3	2	2	2	1	4	1	3	3	2	1	3	2
				Early pregnancy	Maternal mental health assessment	Self-rating Anxiety Scale (SAS)	33	2 min	normal	2022-06-14 09:20:08	Finish	1	1	1	1	4	1	1	1	1	2	1	1	4	1	2	3	2	1	3	1
				Early pregnancy	Maternal mental health assessment	Self-rating Anxiety Scale (SAS)	26	2 min	normal	2022-06-14 09:27:29	Finish	1	1	1	1	1	1	1	1	1	1	1	1	4	1	1	2	2	1	2	1
				Mid-pregnancy	Maternal mental health assessment	Self-rating Anxiety Scale (SAS)	40	2 min	normal	2022-06-14 09:33:44	Finish	3	3	2	1	3	1	2	2	4	2	2	1	1	1	1	2	2	1	3	3
				Early pregnancy	Maternal mental health assessment	Self-rating Anxiety Scale (SAS)	35	1 min	normal	2022-06-14 09:38:38	Finish	1	1	1	1	4	1	1	1	4	1	1	1	4	1	1	1	4	1	4	1
				Early pregnancy	Maternal mental health assessment	Self-rating Anxiety Scale (SAS)	29	2 min	normal	2022-06-14 09:40:15	Finish	1	1	1	1	1	1	1	3	2	2	1	1	2	1	2	1	2	1	2	2
				Late pregnancy	Maternal mental health assessment	Self-rating Anxiety Scale (SAS)	33	2 min	normal	2022-06-14 09:40:47	Finish	2	1	1	2	3	1	1	1	4	1	1	1	1	1	2	2	2	1	3	2
				Early pregnancy	Maternal mental health assessment	Self-rating Anxiety Scale (SAS)	45	2 min	mild	2022-06-14 09:52:16	Finish	2	1	1	1	4	2	3	3	3	2	4	2	2	1	4	1	3	1	4	1
				Early pregnancy	Maternal mental health assessment	Self-rating Anxiety Scale (SAS)	34	2 min	normal	2022-06-14 10:03:07	Finish	1	1	1	1	1	1	2	2	2	2	1	1	3	1	3	2	3	2	3	1
				Early pregnancy	Maternal mental health assessment	Self-rating Anxiety Scale (SAS)	35	5 min	normal	2022-06-14 10:10:54	Finish	1	1	1	1	2	1	2	1	4	1	1	1	4	1	2	2	4	1	2	2
				Early pregnancy	Maternal mental health assessment	Self-rating Anxiety Scale (SAS)	25	3 min	normal	2022-06-14 10:34:22	Finish	2	1	1	1	3	1	1	1	1	1	1	1	1	1	1	2	2	1	1	1
				Early pregnancy	Maternal mental health assessment	Self-rating Anxiety Scale (SAS)	23	2 min	normal	2022-06-14 10:35:15	Finish	1	1	1	1	3	1	1	1	1	2	1	1	1	1	1	1	1	1	1	1
				Mid-pregnancy	Maternal mental health assessment	Self-rating Anxiety Scale (SAS)	34	2 min	normal	2022-06-14 10:37:08	Finish	1	1	1	1	4	1	1	1	4	1	1	1	4	1	1	2	4	1	2	1
				Mid-pregnancy	Maternal mental health assessment	Self-rating Anxiety Scale (SAS)	33	3 min	normal	2022-06-14 10:37:40	Finish	1	1	1	1	2	1	1	1	2	2	2	1	3	2	1	2	3	2	3	1
				Mid-pregnancy	Maternal mental health assessment	Self-rating Anxiety Scale (SAS)	27	2 min	normal	2022-06-14 10:42:16	Finish	1	1	1	1	2	1	1	2	1	1	1	1	1	1	2	3	1	2	2	1
				Early pregnancy	Maternal mental health assessment	Self-rating Anxiety Scale (SAS)	46	1 min	mild	2022-06-14 10:44:08	Finish	3	3	3	2	4	2	2	3	3	2	2	1	1	1	3	3	3	2	2	1
				Mid-pregnancy	Maternal mental health assessment	Self-rating Anxiety Scale (SAS)	31	2 min	normal	2022-06-14 10:56:38	Finish	1	1	1	1	4	2	2	1	2	2	1	1	2	1	1	3	2	1	1	1
				Early pregnancy	Maternal mental health assessment	Self-rating Anxiety Scale (SAS)	29	54 min	normal	2022-06-14 11:02:24	Finish	2	1	1	1	2	1	1	2	2	2	1	1	1	1	1	3	2	1	2	1
				Early pregnancy	Maternal mental health assessment	Self-rating Anxiety Scale (SAS)	25	3 min	normal	2022-06-14 11:05:11	Finish	2	1	1	1	1	1	1	2	2	1	1	1	1	1	1	2	1	1	1	2
				Early pregnancy	Maternal mental health assessment	Self-rating Anxiety Scale (SAS)	28	2 min	normal	2022-06-14 11:07:32	Finish	1	1	1	1	4	1	2	1	1	1	1	1	2	1	1	2	2	1	1	2
				Early pregnancy	Maternal mental health assessment	Self-rating Anxiety Scale (SAS)	37	5 min	normal	2022-06-14 11:09:07	Finish	1	1	1	1	4	1	1	1	4	2	1	1	4	1	1	3	4	1	3	1
				Early pregnancy	Maternal mental health assessment	Self-rating Anxiety Scale (SAS)	38	1 min	normal	2022-06-14 11:16:20	Finish	1	1	1	1	4	1	1	1	4	2	2	2	3	1	2	3	3	1	2	2
				Early pregnancy	Maternal mental health assessment	Self-rating Anxiety Scale (SAS)	24	7 min	normal	2022-06-14 11:23:12	Finish	1	1	1	1	1	1	1	1	1	1	1	1	1	1	1	3	1	1	3	1
				Early pregnancy	Maternal mental health assessment	Self-rating Anxiety Scale (SAS)	29	2 min	normal	2022-06-14 11:33:59	Finish	1	1	1	1	4	1	1	1	4	1	1	1	2	1	1	1	2	1	2	1
				Early pregnancy	Maternal mental health assessment	Self-rating Anxiety Scale (SAS)	38	2 min	normal	2022-06-14 11:42:31	Finish	2	1	1	1	4	2	2	2	1	2	3	2	2	2	2	2	3	1	2	1
				Early pregnancy	Maternal mental health assessment	Self-rating Anxiety Scale (SAS)	29	2 min	normal	2022-06-14 13:37:43	Finish	1	1	1	1	4	1	2	1	4	1	1	1	1	1	2	2	1	1	1	1
				Early pregnancy	Maternal mental health assessment	Self-rating Anxiety Scale (SAS)	34	1 min	normal	2022-06-14 13:42:53	Finish	1	1	1	1	2	1	1	2	4	1	2	1	4	1	2	1	4	1	2	1
				Early pregnancy	Maternal mental health assessment	Self-rating Anxiety Scale (SAS)	39	6 min	normal	2022-06-14 13:52:29	Finish	2	2	2	1	4	1	2	2	3	2	1	1	3	2	1	2	3	1	3	1
				Mid-pregnancy	Maternal mental health assessment	Self-rating Anxiety Scale (SAS)	28	2 min	normal	2022-06-14 14:00:22	Finish	1	1	1	1	1	1	1	1	2	2	2	2	1	1	1	3	3	1	1	1
				Mid-pregnancy	Maternal mental health assessment	Self-rating Anxiety Scale (SAS)	32	2 min	normal	2022-06-14 14:21:35	Finish	2	1	1	1	4	1	1	1	1	1	1	1	4	1	1	1	4	1	3	1
				Late pregnancy	Maternal mental health assessment	Self-rating Anxiety Scale (SAS)	41	4 min	normal	2022-06-14 14:25:57	Finish	1	1	1	2	3	1	2	3	3	2	1	1	2	2	3	3	3	3	3	1
				Early pregnancy	Maternal mental health assessment	Self-rating Anxiety Scale (SAS)	34	2 min	normal	2022-06-14 16:00:11	Finish	1	2	1	1	4	1	1	1	2	2	1	1	2	1	1	3	1	3	3	2
				Late pregnancy	Maternal mental health assessment	Self-rating Anxiety Scale (SAS)	45	3 min	mild	2022-06-14 16:18:08	Finish	3	3	3	3	3	2	2	2	2	2	2	3	1	2	2	2	2	1	4	1
				Early pregnancy	Maternal mental health assessment	Self-rating Anxiety Scale (SAS)	43	2 min	mild	2022-06-15 07:49:28	Finish	3	3	3	3	3	1	1	3	4	2	2	1	1	2	3	3	2	1	1	1
				Early pregnancy	Maternal mental health assessment	Self-rating Anxiety Scale (SAS)	32	1 min	normal	2022-06-15 08:13:08	Finish	1	1	1	1	1	1	1	1	4	2	1	1	4	1	2	3	1	1	3	1
				Early pregnancy	Maternal mental health assessment	Self-rating Anxiety Scale (SAS)	26	1 min	normal	2022-06-15 08:13:18	Finish	1	1	1	1	4	1	1	1	1	1	1	1	4	1	1	1	1	1	1	1
				Early pregnancy	Maternal mental health assessment	Self-rating Anxiety Scale (SAS)	39	1 min	normal	2022-06-15 08:27:42	Finish	2	2	2	1	3	1	1	1	4	1	1	1	4	1	1	3	4	1	4	1
				Early pregnancy	Maternal mental health assessment	Self-rating Anxiety Scale (SAS)	35	3 min	normal	2022-06-15 08:30:30	Finish	2	2	1	1	1	2	1	2	2	1	1	2	4	1	3	3	2	1	2	1
				Mid-pregnancy	Maternal mental health assessment	Self-rating Anxiety Scale (SAS)	31	2 min	normal	2022-06-15 08:36:17	Finish	1	1	1	1	4	1	1	2	2	2	1	1	2	2	1	2	2	1	2	1
				Early pregnancy	Maternal mental health assessment	Self-rating Anxiety Scale (SAS)	26	1 min	normal	2022-06-15 08:41:38	Finish	1	1	1	1	1	1	1	1	1	1	1	2	1	1	3	4	1	1	1	1
				Early pregnancy	Maternal mental health assessment	Self-rating Anxiety Scale (SAS)	24	2 min	normal	2022-06-15 09:06:38	Finish	2	1	1	1	1	1	1	1	1	1	1	1	1	1	1	2	2	2	1	1
				Early pregnancy	Maternal mental health assessment	Self-rating Anxiety Scale (SAS)	42	5 min	normal	2022-06-15 09:12:23	Finish	3	2	3	1	3	1	1	2	3	2	2	1	4	1	3	3	2	1	3	1
				Mid-pregnancy	Maternal mental health assessment	Self-rating Anxiety Scale (SAS)	34	2 min	normal	2022-06-15 09:13:38	Finish	1	1	1	1	2	1	1	1	4	1	1	1	2	1	1	1	4	4	2	3
				Early pregnancy	Maternal mental health assessment	Self-rating Anxiety Scale (SAS)	35	2 min	normal	2022-06-15 09:17:18	Finish	1	1	1	1	4	1	1	1	4	1	1	1	4	1	2	2	2	1	3	2
				Early pregnancy	Maternal mental health assessment	Self-rating Anxiety Scale (SAS)	24	1 min	normal	2022-06-15 09:17:58	Finish	1	1	1	1	1	1	1	1	1	1	1	1	1	1	1	1	4	1	1	2
				Early pregnancy	Maternal mental health assessment	Self-rating Anxiety Scale (SAS)	33	2 min	normal	2022-06-15 09:21:00	Finish	2	1	1	1	1	1	1	2	1	2	1	2	4	2	2	2	3	1	2	1
				Mid-pregnancy	Maternal mental health assessment	Self-rating Anxiety Scale (SAS)	29	2 min	normal	2022-06-15 09:21:16	Finish	2	1	1	1	2	1	1	1	2	1	1	1	2	1	1	3	3	1	2	1
				Mid-pregnancy	Maternal mental health assessment	Self-rating Anxiety Scale (SAS)	32	2 min	normal	2022-06-15 09:27:00	Finish	1	1	1	1	4	1	1	2	2	1	1	1	2	1	1	3	2	1	3	2
				Early pregnancy	Maternal mental health assessment	Self-rating Anxiety Scale (SAS)	36	2 min	normal	2022-06-15 09:27:01	Finish	1	1	1	1	4	1	1	1	4	1	1	1	4	1	1	2	4	1	4	1
				Early pregnancy	Maternal mental health assessment	Self-rating Anxiety Scale (SAS)	28	1 min	normal	2022-06-15 09:30:52	Finish	1	1	1	1	2	1	1	2	4	1	1	1	2	1	1	2	1	1	2	1
				Early pregnancy	Maternal mental health assessment	Self-rating Anxiety Scale (SAS)	34	2 min	normal	2022-06-15 09:31:17	Finish	2	1	1	1	1	2	1	2	1	1	1	1	4	1	1	2	4	2	3	2
				Early pregnancy	Maternal mental health assessment	Self-rating Anxiety Scale (SAS)	33	3 min	normal	2022-06-15 09:31:36	Finish	2	1	1	1	3	1	1	3	3	1	1	1	1	1	3	2	3	1	2	1
				Mid-pregnancy	Maternal mental health assessment	Self-rating Anxiety Scale (SAS)	25	2 min	normal	2022-06-15 09:34:52	Finish	1	1	1	1	4	1	1	1	1	1	1	1	1	1	1	2	1	1	1	2
				Late pregnancy	Maternal mental health assessment	Self-rating Anxiety Scale (SAS)	23	1 min	normal	2022-06-15 09:52:17	Finish	1	1	1	1	2	1	1	1	1	1	1	1	1	2	1	2	1	1	1	1
				Early pregnancy	Maternal mental health assessment	Self-rating Anxiety Scale (SAS)	24	1 min	normal	2022-06-15 09:55:34	Finish	2	1	1	1	1	1	2	2	1	1	1	1	1	1	1	2	1	1	1	1
				Late pregnancy	Maternal mental health assessment	Self-rating Anxiety Scale (SAS)	26	2 min	normal	2022-06-15 10:01:39	Finish	1	1	1	1	4	1	1	1	1	1	1	1	1	1	1	1	4	1	1	1
				Early pregnancy	Maternal mental health assessment	Self-rating Anxiety Scale (SAS)	24	2 min	normal	2022-06-15 10:12:59	Finish	1	1	1	1	4	1	1	1	1	1	1	1	1	1	1	2	1	1	1	1
				Early pregnancy	Maternal mental health assessment	Self-rating Anxiety Scale (SAS)	26	4 min	normal	2022-06-15 10:25:26	Finish	1	1	1	1	1	1	2	1	1	1	1	1	1	1	2	3	1	1	2	2
				Early pregnancy	Maternal mental health assessment	Self-rating Anxiety Scale (SAS)	34	1 min	normal	2022-06-15 10:34:21	Finish	2	2	2	1	4	1	1	1	1	2	1	1	4	1	1	2	3	2	1	1
				Early pregnancy	Maternal mental health assessment	Self-rating Anxiety Scale (SAS)	45	1 min	mild	2022-06-15 10:47:45	Finish	2	2	2	2	3	2	2	2	3	2	2	2	3	2	2	2	3	2	3	2
				Early pregnancy	Maternal mental health assessment	Self-rating Anxiety Scale (SAS)	35	1 min	normal	2022-06-15 11:05:50	Finish	1	1	1	1	4	1	1	1	4	1	1	1	4	1	1	1	4	1	4	1
				Early pregnancy	Maternal mental health assessment	Self-rating Anxiety Scale (SAS)	29	2 min	normal	2022-06-15 12:59:18	Finish	2	1	1	1	2	1	2	2	2	2	2	1	1	1	2	2	1	1	1	1
				Early pregnancy	Maternal mental health assessment	Self-rating Anxiety Scale (SAS)	47	3 min	mild	2022-06-15 13:02:43	Finish	2	3	2	1	4	1	2	2	3	2	2	2	3	2	1	3	4	1	4	3
				Early pregnancy	Maternal mental health assessment	Self-rating Anxiety Scale (SAS)	23	2 min	normal	2022-06-15 14:09:10	Finish	1	1	1	1	1	1	1	1	2	1	1	1	1	1	1	2	1	1	2	1
				Early pregnancy	Maternal mental health assessment	Self-rating Anxiety Scale (SAS)	33	2 min	normal	2022-06-15 14:23:56	Finish	2	2	2	1	2	1	2	2	2	2	1	1	1	1	3	2	1	1	2	2
				Early pregnancy	Maternal mental health assessment	Self-rating Anxiety Scale (SAS)	39	2 min	normal	2022-06-15 14:30:30	Finish	1	2	2	1	4	1	1	2	2	1	2	1	2	1	3	4	4	1	3	1
				Mid-pregnancy	Maternal mental health assessment	Self-rating Anxiety Scale (SAS)	25	2 min	normal	2022-06-15 14:31:43	Finish	1	1	1	1	1	1	1	1	2	1	1	1	1	1	1	3	1	1	2	2
				Early pregnancy	Maternal mental health assessment	Self-rating Anxiety Scale (SAS)	33	2 min	normal	2022-06-15 15:14:02	Finish	1	1	1	1	4	1	1	1	4	1	1	1	1	1	2	3	3	1	3	1
				Early pregnancy	Maternal mental health assessment	Self-rating Anxiety Scale (SAS)	34	2 min	normal	2022-06-15 15:37:36	Finish	1	1	1	1	4	1	1	2	4	2	1	1	2	1	2	3	2	1	2	1
				Early pregnancy	Maternal mental health assessment	Self-rating Anxiety Scale (SAS)	26	3 min	normal	2022-06-16 08:02:15	Finish	1	1	1	1	4	1	1	1	2	1	1	1	2	1	1	1	1	1	2	1
				Early pregnancy	Maternal mental health assessment	Self-rating Anxiety Scale (SAS)	32	2 min	normal	2022-06-16 08:34:41	Finish	1	1	1	1	2	1	1	2	2	1	3	2	2	1	2	2	2	1	3	1
				Early pregnancy	Maternal mental health assessment	Self-rating Anxiety Scale (SAS)	46	1 min	mild	2022-06-16 09:42:18	Finish	3	2	2	2	2	1	2	2	3	3	1	2	4	1	3	2	4	1	4	2
				Early pregnancy	Maternal mental health assessment	Self-rating Anxiety Scale (SAS)	27	2 min	normal	2022-06-16 09:42:26	Finish	1	1	1	1	4	1	1	2	1	2	1	1	1	1	2	1	1	1	2	1
				Late pregnancy	Maternal mental health assessment	Self-rating Anxiety Scale (SAS)	31	2 min	normal	2022-06-16 09:45:24	Finish	1	2	1	1	4	1	2	2	3	1	1	1	1	1	2	2	1	1	1	2
				Early pregnancy	Maternal mental health assessment	Self-rating Anxiety Scale (SAS)	20	8 min	normal	2022-06-16 09:48:57	Finish	1	1	1	1	1	1	1	1	1	1	1	1	1	1	1	1	1	1	1	1
				Mid-pregnancy	Maternal mental health assessment	Self-rating Anxiety Scale (SAS)	29	2 min	normal	2022-06-16 09:49:10	Finish	1	1	1	1	4	1	1	1	4	1	1	1	2	1	1	1	2	1	1	2
				Early pregnancy	Maternal mental health assessment	Self-rating Anxiety Scale (SAS)	32	4 min	normal	2022-06-16 09:50:19	Finish	2	1	2	1	2	1	1	2	2	2	1	1	1	1	2	3	2	1	2	2
				Early pregnancy	Maternal mental health assessment	Self-rating Anxiety Scale (SAS)	30	3 min	normal	2022-06-16 09:55:39	Finish	1	1	2	1	4	2	2	2	1	2	1	1	1	1	1	2	1	2	1	1
				Early pregnancy	Maternal mental health assessment	Self-rating Anxiety Scale (SAS)	23	2 min	normal	2022-06-16 09:59:22	Finish	1	1	1	1	1	1	1	2	1	2	1	1	1	1	2	1	1	1	1	1
				Early pregnancy	Maternal mental health assessment	Self-rating Anxiety Scale (SAS)	38	2 min	normal	2022-06-16 10:02:00	Finish	2	1	1	1	4	1	2	2	4	2	2	1	2	1	2	2	3	1	3	1
				Early pregnancy	Maternal mental health assessment	Self-rating Anxiety Scale (SAS)	31	2 min	normal	2022-06-16 10:02:56	Finish	1	1	1	1	1	1	3	3	2	1	2	1	1	1	2	3	2	1	2	1
				Early pregnancy	Maternal mental health assessment	Self-rating Anxiety Scale (SAS)	35	2 min	normal	2022-06-16 10:22:14	Finish	2	2	2	1	2	1	1	2	2	1	2	1	2	2	2	3	2	2	2	1
				Early pregnancy	Maternal mental health assessment	Self-rating Anxiety Scale (SAS)	38	1 min	normal	2022-06-16 10:31:49	Finish	1	1	1	1	4	1	1	1	4	1	1	1	4	1	1	3	4	2	3	2
				Mid-pregnancy	Maternal mental health assessment	Self-rating Anxiety Scale (SAS)	32	4 min	normal	2022-06-16 10:31:58	Finish	1	2	2	1	1	1	1	1	4	1	1	1	4	1	1	1	4	1	2	1
				Early pregnancy	Maternal mental health assessment	Self-rating Anxiety Scale (SAS)	31	3 min	normal	2022-06-16 10:41:25	Finish	2	1	1	1	2	1	1	2	2	2	1	1	1	1	2	3	3	1	2	1
				Early pregnancy	Maternal mental health assessment	Self-rating Anxiety Scale (SAS)	26	2 min	normal	2022-06-16 10:46:03	Finish	1	1	1	1	2	1	1	1	2	1	1	1	1	1	2	2	1	1	2	2
				Early pregnancy	Maternal mental health assessment	Self-rating Anxiety Scale (SAS)	34	2 min	normal	2022-06-16 10:50:48	Finish	1	1	1	1	2	1	1	1	4	1	2	1	4	1	1	3	2	1	3	2
				Early pregnancy	Maternal mental health assessment	Self-rating Anxiety Scale (SAS)	38	2 min	normal	2022-06-16 10:59:09	Finish	2	2	3	1	3	1	2	3	3	2	2	3	2	1	1	1	2	1	2	1
				Early pregnancy	Maternal mental health assessment	Self-rating Anxiety Scale (SAS)	25	2 min	normal	2022-06-16 11:00:14	Finish	1	1	1	1	2	1	1	1	2	1	1	1	1	1	1	3	2	1	1	1
				Early pregnancy	Maternal mental health assessment	Self-rating Anxiety Scale (SAS)	29	43 min	normal	2022-06-16 11:00:36	Finish	1	1	1	1	3	1	1	1	2	2	2	1	1	1	2	1	2	2	2	1
				Early pregnancy	Maternal mental health assessment	Self-rating Anxiety Scale (SAS)	37	2 min	normal	2022-06-16 13:11:57	Finish	3	2	2	1	1	1	1	3	4	2	2	1	1	1	1	3	2	1	3	2
				Early pregnancy	Maternal mental health assessment	Self-rating Anxiety Scale (SAS)	32	3 min	normal	2022-06-16 13:41:55	Finish	2	2	1	1	1	1	1	2	3	1	1	1	4	1	1	2	3	1	1	2
				Early pregnancy	Maternal mental health assessment	Self-rating Anxiety Scale (SAS)	30	1 min	normal	2022-06-16 13:47:10	Finish	1	1	1	1	1	1	1	1	4	1	2	2	4	1	2	2	1	1	1	1
				Early pregnancy	Maternal mental health assessment	Self-rating Anxiety Scale (SAS)	30	4 min	normal	2022-06-16 13:51:06	Finish	1	1	1	1	4	1	2	1	1	4	1	1	4	1	1	1	1	1	1	1
				Early pregnancy	Maternal mental health assessment	Self-rating Anxiety Scale (SAS)	38	2 min	normal	2022-06-16 13:52:08	Finish	1	1	1	1	4	1	1	2	3	1	1	1	4	1	3	3	2	2	4	1
				Mid-pregnancy	Maternal mental health assessment	Self-rating Anxiety Scale (SAS)	42	3 min	normal	2022-06-16 13:52:12	Finish	3	2	2	2	3	1	2	2	3	2	1	1	1	1	3	4	2	1	3	3
				Early pregnancy	Maternal mental health assessment	Self-rating Anxiety Scale (SAS)	28	3 min	normal	2022-06-16 14:08:39	Finish	1	1	1	1	1	1	1	2	1	2	2	1	1	1	2	2	3	1	2	1
				Early pregnancy	Maternal mental health assessment	Self-rating Anxiety Scale (SAS)	27	4 min	normal	2022-06-16 14:16:28	Finish	1	1	1	1	1	1	2	2	1	2	1	2	1	1	3	1	1	1	1	2
				Early pregnancy	Maternal mental health assessment	Self-rating Anxiety Scale (SAS)	22	2 min	normal	2022-06-16 14:20:10	Finish	1	1	1	1	1	1	1	1	1	1	1	1	1	1	1	2	1	1	2	1
				Early pregnancy	Maternal mental health assessment	Self-rating Anxiety Scale (SAS)	26	2 min	normal	2022-06-16 14:49:25	Finish	1	1	1	1	1	1	1	2	1	2	1	1	1	2	1	2	2	2	1	1
				Early pregnancy	Maternal mental health assessment	Self-rating Anxiety Scale (SAS)	31	3 min	normal	2022-06-16 15:16:31	Finish	1	1	1	1	4	1	1	1	3	1	1	1	1	1	1	2	4	1	3	1
				Early pregnancy	Maternal mental health assessment	Self-rating Anxiety Scale (SAS)	35	1 min	normal	2022-06-16 15:21:17	Finish	1	1	1	1	4	1	1	1	4	1	1	1	4	1	1	1	4	1	4	1
				Mid-pregnancy	Maternal mental health assessment	Self-rating Anxiety Scale (SAS)	39	1 min	normal	2022-06-16 15:31:09	Finish	2	2	2	1	2	1	1	3	2	1	2	2	3	1	1	3	4	1	4	1
				Early pregnancy	Maternal mental health assessment	Self-rating Anxiety Scale (SAS)	33	2 min	normal	2022-06-17 07:54:02	Finish	1	1	1	1	1	2	3	2	1	2	2	2	3	1	3	2	1	1	1	2
				Early pregnancy	Maternal mental health assessment	Self-rating Anxiety Scale (SAS)	20	1 min	normal	2022-06-17 07:56:22	Finish	1	1	1	1	1	1	1	1	1	1	1	1	1	1	1	1	1	1	1	1
				Early pregnancy	Maternal mental health assessment	Self-rating Anxiety Scale (SAS)	29	1 min	normal	2022-06-17 07:56:35	Finish	1	1	1	1	1	1	1	1	4	1	1	1	4	1	1	1	4	1	1	1
				Early pregnancy	Maternal mental health assessment	Self-rating Anxiety Scale (SAS)	27	2 min	normal	2022-06-17 08:03:08	Finish	1	1	1	1	1	1	1	1	1	1	1	1	4	1	1	3	2	1	2	1
				Mid-pregnancy	Maternal mental health assessment	Self-rating Anxiety Scale (SAS)	26	2 min	normal	2022-06-17 08:06:13	Finish	1	1	1	1	4	1	1	1	1	1	1	1	1	1	1	2	1	1	2	2
				Mid-pregnancy	Maternal mental health assessment	Self-rating Anxiety Scale (SAS)	39	2 min	normal	2022-06-17 08:21:26	Finish	2	1	1	1	4	1	2	2	3	2	1	2	2	2	1	1	4	3	2	2
				Early pregnancy	Maternal mental health assessment	Self-rating Anxiety Scale (SAS)	40	3 min	normal	2022-06-17 08:26:12	Finish	2	1	2	2	4	1	2	3	2	2	1	1	1	1	3	3	3	2	2	2
				3 days after delivery	Maternal mental health assessment	Self-rating Anxiety Scale (SAS)	39	2 min	normal	2022-06-17 08:49:21	Finish	2	2	2	1	4	1	2	2	3	1	2	1	3	1	3	3	2	1	1	2
				Early pregnancy	Maternal mental health assessment	Self-rating Anxiety Scale (SAS)	23	3 min	normal	2022-06-17 09:10:02	Finish	1	1	1	1	1	1	1	1	1	1	1	2	1	1	2	1	1	1	1	2
				Early pregnancy	Maternal mental health assessment	Self-rating Anxiety Scale (SAS)	32	2 min	normal	2022-06-17 09:13:10	Finish	1	1	1	1	4	1	1	3	2	2	1	2	2	1	2	2	2	1	1	1
				Early pregnancy	Maternal mental health assessment	Self-rating Anxiety Scale (SAS)	39	18 min	normal	2022-06-17 09:18:03	Finish	1	1	1	1	3	1	3	3	2	2	2	1	3	1	2	3	3	1	3	2
				Early pregnancy	Maternal mental health assessment	Self-rating Anxiety Scale (SAS)	23	2 min	normal	2022-06-17 09:20:56	Finish	1	1	1	1	1	1	1	1	1	1	1	1	1	1	1	1	4	1	1	1
				Early pregnancy	Maternal mental health assessment	Self-rating Anxiety Scale (SAS)	23	5 min	normal	2022-06-17 09:24:02	Finish	1	1	1	1	1	1	1	1	2	1	1	1	1	1	1	3	1	1	1	1
				Early pregnancy	Maternal mental health assessment	Self-rating Anxiety Scale (SAS)	24	2 min	normal	2022-06-17 09:24:09	Finish	1	1	1	1	1	1	1	1	1	1	1	1	1	1	2	3	1	1	2	1
				Early pregnancy	Maternal mental health assessment	Self-rating Anxiety Scale (SAS)	37	1 min	normal	2022-06-17 09:25:09	Finish	1	1	1	1	4	1	1	1	4	1	1	1	3	2	2	3	2	3	2	2
				Early pregnancy	Maternal mental health assessment	Self-rating Anxiety Scale (SAS)	42	2 min	normal	2022-06-17 09:32:59	Finish	2	2	2	1	2	1	3	2	2	2	2	1	1	4	2	4	2	2	3	2
				Mid-pregnancy	Maternal mental health assessment	Self-rating Anxiety Scale (SAS)	28	2 min	normal	2022-06-17 09:33:56	Finish	1	1	1	1	4	1	1	1	2	1	1	1	1	1	1	3	2	1	2	1
				Early pregnancy	Maternal mental health assessment	Self-rating Anxiety Scale (SAS)	27	2 min	normal	2022-06-17 09:40:36	Finish	1	1	1	1	2	1	1	1	2	1	1	1	2	1	1	2	2	2	2	1
				Early pregnancy	Maternal mental health assessment	Self-rating Anxiety Scale (SAS)	32	1 min	normal	2022-06-17 09:47:13	Finish	1	1	1	1	4	1	1	1	4	1	1	1	4	1	1	1	4	1	1	1
				Early pregnancy	Maternal mental health assessment	Self-rating Anxiety Scale (SAS)	20	2 min	normal	2022-06-17 09:54:24	Finish	1	1	1	1	1	1	1	1	1	1	1	1	1	1	1	1	1	1	1	1
				Early pregnancy	Maternal mental health assessment	Self-rating Anxiety Scale (SAS)	29	2 min	normal	2022-06-17 10:01:00	Finish	1	1	1	1	4	1	1	1	4	1	1	1	4	1	1	1	1	1	1	1
				Early pregnancy	Maternal mental health assessment	Self-rating Anxiety Scale (SAS)	33	8 min	normal	2022-06-17 10:03:53	Finish	2	1	1	1	1	1	1	2	2	1	3	2	2	1	4	3	1	1	2	1
				Early pregnancy	Maternal mental health assessment	Self-rating Anxiety Scale (SAS)	25	3 min	normal	2022-06-17 10:04:13	Finish	1	2	1	1	3	1	1	1	2	1	1	1	2	1	1	1	1	1	1	1
				Early pregnancy	Maternal mental health assessment	Self-rating Anxiety Scale (SAS)	34	1 min	normal	2022-06-17 10:06:04	Finish	2	1	1	1	1	1	1	1	1	1	1	1	1	1	4	2	3	4	4	2
				Early pregnancy	Maternal mental health assessment	Self-rating Anxiety Scale (SAS)	44	2 min	mild	2022-06-17 10:12:36	Finish	1	2	2	1	4	1	1	4	2	3	2	1	4	1	1	4	4	4	1	1
				Early pregnancy	Maternal mental health assessment	Self-rating Anxiety Scale (SAS)	21	2 min	normal	2022-06-17 10:34:14	Finish	1	1	1	1	2	1	1	1	1	1	1	1	1	1	1	1	1	1	1	1
				Early pregnancy	Maternal mental health assessment	Self-rating Anxiety Scale (SAS)	39	50 min	normal	2022-06-17 10:38:47	Finish	3	1	3	2	4	1	2	2	2	2	2	1	1	1	3	3	2	1	2	1
				Early pregnancy	Maternal mental health assessment	Self-rating Anxiety Scale (SAS)	37	49 min	normal	2022-06-17 10:39:43	Finish	1	1	1	1	4	1	2	1	4	1	1	1	4	1	1	1	4	1	4	2
				Early pregnancy	Maternal mental health assessment	Self-rating Anxiety Scale (SAS)	23	2 min	normal	2022-06-17 10:40:20	Finish	1	1	1	1	1	1	1	1	1	1	1	1	1	1	1	1	4	1	1	1
				Early pregnancy	Maternal mental health assessment	Self-rating Anxiety Scale (SAS)	22	12 min	normal	2022-06-17 10:45:09	Finish	1	1	1	1	1	1	1	1	1	1	1	1	1	1	1	2	2	1	1	1
				Early pregnancy	Maternal mental health assessment	Self-rating Anxiety Scale (SAS)	40	2 min	normal	2022-06-17 10:48:40	Finish	2	2	2	1	4	1	2	2	3	1	1	2	2	1	2	3	2	2	2	3
				Early pregnancy	Maternal mental health assessment	Self-rating Anxiety Scale (SAS)	29	2 min	normal	2022-06-17 10:50:50	Finish	1	1	1	1	3	1	1	2	2	1	1	1	2	1	1	1	2	1	3	2
				Mid-pregnancy	Maternal mental health assessment	Self-rating Anxiety Scale (SAS)	27	2 min	normal	2022-06-17 10:54:12	Finish	1	1	1	1	1	1	1	1	2	1	1	1	4	1	1	2	2	2	1	1
				Early pregnancy	Maternal mental health assessment	Self-rating Anxiety Scale (SAS)	30	2 min	normal	2022-06-17 10:54:59	Finish	1	1	2	2	1	1	1	3	1	1	2	1	1	1	3	1	1	1	3	2
				Early pregnancy	Maternal mental health assessment	Self-rating Anxiety Scale (SAS)	30	2 min	normal	2022-06-17 10:57:45	Finish	1	1	1	1	4	1	1	1	2	1	1	1	4	1	1	2	2	1	2	1
				Early pregnancy	Maternal mental health assessment	Self-rating Anxiety Scale (SAS)	33	2 min	normal	2022-06-17 10:58:47	Finish	2	2	2	1	4	1	1	1	2	1	1	1	3	1	1	2	3	1	2	1
				Early pregnancy	Maternal mental health assessment	Self-rating Anxiety Scale (SAS)	36	2 min	normal	2022-06-17 11:00:20	Finish	2	1	1	1	2	1	2	3	2	2	2	1	2	1	3	3	2	2	2	1
				Early pregnancy	Maternal mental health assessment	Self-rating Anxiety Scale (SAS)	20	2 min	normal	2022-06-17 11:04:53	Finish	1	1	1	1	1	1	1	1	1	1	1	1	1	1	1	1	1	1	1	1
				Early pregnancy	Maternal mental health assessment	Self-rating Anxiety Scale (SAS)	40	1 min	normal	2022-06-17 11:15:31	Finish	1	1	2	1	4	1	1	2	4	2	2	2	3	1	1	2	3	2	4	1
				Mid-pregnancy	Maternal mental health assessment	Self-rating Anxiety Scale (SAS)	21	1 min	normal	2022-06-17 11:25:31	Finish	1	1	1	1	1	1	1	1	1	1	1	1	1	1	1	1	1	1	2	1
				Mid-pregnancy	Maternal mental health assessment	Self-rating Anxiety Scale (SAS)	31	2 min	normal	2022-06-17 11:38:10	Finish	1	2	1	1	2	1	1	1	2	2	1	1	4	1	1	2	4	1	1	1
				Early pregnancy	Maternal mental health assessment	Self-rating Anxiety Scale (SAS)	25	2 min	normal	2022-06-17 13:59:07	Finish	1	1	1	1	1	1	2	1	1	1	1	1	1	1	2	2	2	2	1	1
				Mid-pregnancy	Maternal mental health assessment	Self-rating Anxiety Scale (SAS)	35	2 min	normal	2022-06-17 14:58:43	Finish	1	1	2	1	4	1	1	1	4	1	1	1	4	1	1	4	1	1	3	1
				Early pregnancy	Maternal mental health assessment	Self-rating Anxiety Scale (SAS)	23	2 min	normal	2022-06-17 15:05:43	Finish	1	1	1	1	1	1	1	1	1	1	1	1	1	1	2	2	1	1	1	2
				Early pregnancy	Maternal mental health assessment	Self-rating Anxiety Scale (SAS)	33	3 min	normal	2022-06-17 15:05:49	Finish	1	1	1	1	2	1	2	1	2	4	1	1	4	1	2	2	2	2	1	1
				Mid-pregnancy	Maternal mental health assessment	Self-rating Anxiety Scale (SAS)	38	5 min	normal	2022-06-17 15:05:51	Finish	2	2	1	2	2	1	2	2	1	2	1	1	2	2	2	3	2	3	2	3
				Early pregnancy	Maternal mental health assessment	Self-rating Anxiety Scale (SAS)	52	8 min	中度	2022-06-17 15:53:47	Finish	2	2	2	2	3	2	3	3	3	2	3	2	4	2	3	2	3	2	4	3
				Early pregnancy	Maternal mental health assessment	Self-rating Anxiety Scale (SAS)	26	2 min	normal	2022-06-17 16:04:51	Finish	1	1	1	1	4	1	1	1	1	1	1	1	1	1	2	2	1	1	2	1
				Early pregnancy	Maternal mental health assessment	Self-rating Anxiety Scale (SAS)	31	3 min	normal	2022-06-20 07:59:29	Finish	1	1	1	1	3	1	2	2	1	2	1	2	1	2	2	2	3	1	1	1
				Early pregnancy	Maternal mental health assessment	Self-rating Anxiety Scale (SAS)	30	2 min	normal	2022-06-20 08:19:21	Finish	2	1	1	1	3	1	1	1	2	1	1	1	2	1	1	2	2	1	3	2
				Early pregnancy	Maternal mental health assessment	Self-rating Anxiety Scale (SAS)	35	1 min	normal	2022-06-20 08:23:02	Finish	1	1	1	1	4	1	1	1	2	2	2	2	2	1	3	2	2	2	2	2
				Early pregnancy	Maternal mental health assessment	Self-rating Anxiety Scale (SAS)	23	1 min	normal	2022-06-20 08:33:28	Finish	1	1	1	1	1	1	2	1	1	1	1	1	1	1	2	1	2	1	1	1
				Early pregnancy	Maternal mental health assessment	Self-rating Anxiety Scale (SAS)	36	2 min	normal	2022-06-20 08:35:30	Finish	1	2	2	1	3	1	2	2	1	2	2	2	1	2	3	2	1	1	1	4
				Early pregnancy	Maternal mental health assessment	Self-rating Anxiety Scale (SAS)	38	2 min	normal	2022-06-20 09:10:02	Finish	1	1	1	1	4	1	1	1	4	1	1	1	4	1	2	3	4	1	4	1
				Early pregnancy	Maternal mental health assessment	Self-rating Anxiety Scale (SAS)	24	2 min	normal	2022-06-20 09:10:14	Finish	1	1	1	1	1	1	1	1	1	1	1	1	1	1	1	2	4	1	1	1
				Early pregnancy	Maternal mental health assessment	Self-rating Anxiety Scale (SAS)	32	2 min	normal	2022-06-20 09:11:55	Finish	2	1	2	1	1	1	2	2	2	3	2	2	1	1	2	1	1	1	2	2
				Mid-pregnancy	Maternal mental health assessment	Self-rating Anxiety Scale (SAS)	26	67 min	normal	2022-06-20 09:40:47	Finish	1	1	1	1	4	1	2	2	1	1	1	1	1	1	1	1	1	1	2	1
				Early pregnancy	Maternal mental health assessment	Self-rating Anxiety Scale (SAS)	28	2 min	normal	2022-06-20 09:41:13	Finish	1	1	1	1	4	1	2	2	1	1	1	1	1	1	1	3	1	1	2	1
				Early pregnancy	Maternal mental health assessment	Self-rating Anxiety Scale (SAS)	27	1 min	normal	2022-06-20 09:47:15	Finish	1	1	1	1	4	1	1	1	4	1	1	1	1	1	1	2	1	1	1	1
				Early pregnancy	Maternal mental health assessment	Self-rating Anxiety Scale (SAS)	30	2 min	normal	2022-06-20 09:58:23	Finish	1	1	1	1	4	1	1	1	2	1	1	1	2	1	3	2	2	1	2	1
				Early pregnancy	Maternal mental health assessment	Self-rating Anxiety Scale (SAS)	28	15 min	normal	2022-06-20 10:02:47	Finish	1	1	1	1	4	1	1	1	2	1	1	1	2	1	1	2	2	1	2	1
				Early pregnancy	Maternal mental health assessment	Self-rating Anxiety Scale (SAS)	44	1 min	mild	2022-06-20 10:02:59	Finish	2	2	2	1	4	2	2	2	2	2	2	2	2	2	3	3	2	2	3	2
				Early pregnancy	Maternal mental health assessment	Self-rating Anxiety Scale (SAS)	34	3 min	normal	2022-06-20 10:04:48	Finish	2	1	2	1	4	1	1	1	3	1	1	1	4	1	1	2	2	1	3	1
				Early pregnancy	Maternal mental health assessment	Self-rating Anxiety Scale (SAS)	18	18 min	normal	2022-06-20 10:06:48	Finish	--	--	--	--	--	--	--	--	--	--	1	1	2	2	1	3	3	1	2	2
				Early pregnancy	Maternal mental health assessment	Self-rating Anxiety Scale (SAS)	43	2 min	mild	2022-06-20 10:25:38	Finish	2	1	1	1	4	1	3	2	2	2	3	1	4	1	3	2	4	1	4	1
				Early pregnancy	Maternal mental health assessment	Self-rating Anxiety Scale (SAS)	29	2 min	normal	2022-06-20 10:27:13	Finish	1	1	2	1	2	1	2	2	1	1	3	2	1	1	3	1	1	1	1	1
				Early pregnancy	Maternal mental health assessment	Self-rating Anxiety Scale (SAS)	25	2 min	normal	2022-06-20 10:32:38	Finish	1	1	1	1	1	1	1	1	1	2	1	1	2	1	1	2	2	2	1	1
				Early pregnancy	Maternal mental health assessment	Self-rating Anxiety Scale (SAS)	29	1 min	normal	2022-06-20 10:34:19	Finish	3	2	2	1	2	1	1	1	2	1	1	1	1	1	1	2	2	1	1	2
				Early pregnancy	Maternal mental health assessment	Self-rating Anxiety Scale (SAS)	20	3 min	normal	2022-06-20 10:34:23	Finish	1	1	1	1	1	1	1	1	1	1	1	1	1	1	1	1	1	1	1	1
				Early pregnancy	Maternal mental health assessment	Self-rating Anxiety Scale (SAS)	33	1 min	normal	2022-06-20 10:37:16	Finish	1	1	1	1	4	1	1	1	3	1	2	2	2	1	1	2	4	2	1	1
				Early pregnancy	Maternal mental health assessment	Self-rating Anxiety Scale (SAS)	45	1 min	mild	2022-06-20 11:02:42	Finish	2	2	2	2	3	2	2	2	3	2	2	2	3	2	2	2	3	2	3	2
				Early pregnancy	Maternal mental health assessment	Self-rating Anxiety Scale (SAS)	29	2 min	normal	2022-06-20 11:02:45	Finish	1	1	1	1	2	1	1	2	3	1	1	1	2	1	2	1	4	1	1	1
				Early pregnancy	Maternal mental health assessment	Self-rating Anxiety Scale (SAS)	39	1 min	normal	2022-06-20 11:02:52	Finish	1	1	1	1	4	1	1	1	4	2	2	1	4	1	2	2	4	1	3	2
				Early pregnancy	Maternal mental health assessment	Self-rating Anxiety Scale (SAS)	34	3 min	normal	2022-06-20 11:04:50	Finish	2	1	1	1	4	1	1	2	2	1	1	1	1	1	2	3	1	4	3	1
				Early pregnancy	Maternal mental health assessment	Self-rating Anxiety Scale (SAS)	26	2 min	normal	2022-06-20 11:26:50	Finish	1	1	1	1	2	1	1	2	2	2	1	1	1	1	2	1	2	1	1	1
				Early pregnancy	Maternal mental health assessment	Self-rating Anxiety Scale (SAS)	27	2 min	normal	2022-06-20 11:34:04	Finish	1	1	1	1	1	1	1	2	2	1	1	1	1	1	1	2	4	1	2	1
				Early pregnancy	Maternal mental health assessment	Self-rating Anxiety Scale (SAS)	26	2 min	normal	2022-06-20 11:49:12	Finish	2	1	1	1	1	1	2	1	2	1	1	1	1	1	2	2	1	1	2	1
				Early pregnancy	Maternal mental health assessment	Self-rating Anxiety Scale (SAS)	37	3 min	normal	2022-06-20 14:06:16	Finish	1	1	1	1	4	1	1	1	4	2	1	2	4	1	1	2	4	1	2	2
				Mid-pregnancy	Maternal mental health assessment	Self-rating Anxiety Scale (SAS)	37	2 min	normal	2022-06-20 14:36:02	Finish	2	1	1	1	4	2	2	1	4	1	2	2	4	1	1	3	2	1	1	1
				Mid-pregnancy	Maternal mental health assessment	Self-rating Anxiety Scale (SAS)	30	3 min	normal	2022-06-20 14:40:58	Finish	1	1	1	1	1	1	1	3	4	1	1	1	2	1	1	2	2	2	1	2
				Mid-pregnancy	Maternal mental health assessment	Self-rating Anxiety Scale (SAS)	40	2 min	normal	2022-06-20 14:45:12	Finish	2	2	2	1	4	1	1	3	4	1	1	2	4	1	1	3	4	1	1	1
				Early pregnancy	Maternal mental health assessment	Self-rating Anxiety Scale (SAS)	37	3 min	normal	2022-06-20 14:45:27	Finish	2	2	2	1	1	1	3	2	3	1	2	1	1	1	2	2	3	1	4	2
				Early pregnancy	Maternal mental health assessment	Self-rating Anxiety Scale (SAS)	37	2 min	normal	2022-06-20 14:50:04	Finish	2	2	1	1	1	1	2	3	3	3	1	1	4	1	2	1	2	2	3	1
				Early pregnancy	Maternal mental health assessment	Self-rating Anxiety Scale (SAS)	39	2 min	normal	2022-06-20 14:50:21	Finish	2	2	2	2	4	1	1	3	2	3	1	1	2	1	3	1	2	2	2	2
				Early pregnancy	Maternal mental health assessment	Self-rating Anxiety Scale (SAS)	30	2 min	normal	2022-06-20 14:55:52	Finish	1	1	1	1	4	1	1	1	1	1	1	1	1	1	2	3	4	1	2	1
				Early pregnancy	Maternal mental health assessment	Self-rating Anxiety Scale (SAS)	27	2 min	normal	2022-06-20 15:05:46	Finish	1	1	1	1	3	1	1	2	1	1	2	1	1	1	2	2	1	1	2	1
				Early pregnancy	Maternal mental health assessment	Self-rating Anxiety Scale (SAS)	30	4 min	normal	2022-06-20 15:09:52	Finish	1	1	1	1	3	1	1	1	2	2	1	1	2	1	2	3	2	1	2	1
				Early pregnancy	Maternal mental health assessment	Self-rating Anxiety Scale (SAS)	35	2 min	normal	2022-06-20 15:22:03	Finish	2	1	2	1	2	1	1	2	2	3	1	1	2	1	3	3	2	2	2	1
				Early pregnancy	Maternal mental health assessment	Self-rating Anxiety Scale (SAS)	38	2 min	normal	2022-06-20 15:25:39	Finish	2	1	3	3	2	1	1	3	2	2	1	1	4	1	2	1	3	1	3	1
				Early pregnancy	Maternal mental health assessment	Self-rating Anxiety Scale (SAS)	31	9 min	normal	2022-06-20 15:28:31	Finish	1	1	1	1	4	1	1	2	1	2	2	1	2	1	3	2	1	1	2	1
				Early pregnancy	Maternal mental health assessment	Self-rating Anxiety Scale (SAS)	36	3 min	normal	2022-06-21 08:04:18	Finish	2	2	2	2	2	1	1	1	2	3	1	1	3	1	1	3	3	2	1	2
				Early pregnancy	Maternal mental health assessment	Self-rating Anxiety Scale (SAS)	35	2 min	normal	2022-06-21 08:58:02	Finish	1	2	2	1	2	1	1	2	3	3	2	1	2	1	1	3	3	1	2	1
				Early pregnancy	Maternal mental health assessment	Self-rating Anxiety Scale (SAS)	25	2 min	normal	2022-06-21 09:18:12	Finish	1	1	1	1	1	1	1	2	1	1	1	1	1	1	2	2	2	1	2	1
				Mid-pregnancy	Maternal mental health assessment	Self-rating Anxiety Scale (SAS)	40	5 min	normal	2022-06-21 09:28:03	Finish	2	2	2	3	3	2	1	2	4	1	1	2	2	1	1	1	4	1	3	2
				Early pregnancy	Maternal mental health assessment	Self-rating Anxiety Scale (SAS)	34	3 min	normal	2022-06-21 09:28:17	Finish	2	1	2	1	2	1	2	1	4	2	1	1	2	1	1	3	2	1	3	1
				Early pregnancy	Maternal mental health assessment	Self-rating Anxiety Scale (SAS)	35	1 min	normal	2022-06-21 09:30:17	Finish	1	1	1	1	4	1	1	1	4	1	1	1	4	1	1	1	4	1	4	1
				Early pregnancy	Maternal mental health assessment	Self-rating Anxiety Scale (SAS)	26	1 min	normal	2022-06-21 09:30:33	Finish	2	1	1	1	1	1	1	1	1	2	1	1	4	1	1	2	1	1	1	1
				Mid-pregnancy	Maternal mental health assessment	Self-rating Anxiety Scale (SAS)	33	1 min	normal	2022-06-21 09:32:01	Finish	1	1	1	1	4	1	1	1	3	1	1	1	4	1	1	3	2	1	3	1
				Early pregnancy	Maternal mental health assessment	Self-rating Anxiety Scale (SAS)	35	1 min	normal	2022-06-21 09:36:36	Finish	1	1	1	1	4	1	1	1	4	1	1	1	4	1	1	1	4	1	4	1
				Early pregnancy	Maternal mental health assessment	Self-rating Anxiety Scale (SAS)	38	2 min	normal	2022-06-21 09:38:51	Finish	2	2	1	1	4	1	1	2	3	1	2	1	4	1	2	1	4	1	3	1
				Mid-pregnancy	Maternal mental health assessment	Self-rating Anxiety Scale (SAS)	36	2 min	normal	2022-06-21 09:40:31	Finish	1	1	1	1	4	1	1	1	4	1	1	1	4	1	1	2	4	1	4	1
				Early pregnancy	Maternal mental health assessment	Self-rating Anxiety Scale (SAS)	26	2 min	normal	2022-06-21 09:43:29	Finish	1	1	1	1	4	1	1	1	1	1	1	1	1	1	1	1	4	1	1	1
				Early pregnancy	Maternal mental health assessment	Self-rating Anxiety Scale (SAS)	21	2 min	normal	2022-06-21 09:45:07	Finish	1	1	1	1	1	1	1	1	1	1	1	1	1	1	1	1	1	1	2	1
				Early pregnancy	Maternal mental health assessment	Self-rating Anxiety Scale (SAS)	23	2 min	normal	2022-06-21 09:48:42	Finish	2	1	1	1	1	1	1	1	1	1	1	1	1	1	1	3	1	1	1	1
				Early pregnancy	Maternal mental health assessment	Self-rating Anxiety Scale (SAS)	29	7 min	normal	2022-06-21 09:59:48	Finish	1	1	1	1	1	1	2	2	1	1	1	1	4	1	1	3	2	1	2	1
				Early pregnancy	Maternal mental health assessment	Self-rating Anxiety Scale (SAS)	27	2 min	normal	2022-06-21 10:02:42	Finish	1	1	1	1	2	1	1	1	2	1	1	1	2	1	1	3	2	1	1	2
				Mid-pregnancy	Maternal mental health assessment	Self-rating Anxiety Scale (SAS)	33	2 min	normal	2022-06-21 10:16:26	Finish	2	2	2	1	3	1	1	1	1	1	1	1	1	2	1	2	2	2	4	2
				Early pregnancy	Maternal mental health assessment	Self-rating Anxiety Scale (SAS)	30	50 min	normal	2022-06-21 10:18:17	Finish	1	1	1	1	2	1	1	2	2	2	1	1	2	1	1	2	2	1	3	2
				Early pregnancy	Maternal mental health assessment	Self-rating Anxiety Scale (SAS)	28	2 min	normal	2022-06-21 10:21:26	Finish	1	1	1	1	4	1	1	1	2	1	1	1	1	1	2	2	2	1	2	1
				Early pregnancy	Maternal mental health assessment	Self-rating Anxiety Scale (SAS)	39	3 min	normal	2022-06-21 10:25:18	Finish	3	3	2	1	2	1	2	2	2	2	1	1	1	1	3	3	1	4	3	1
				Early pregnancy	Maternal mental health assessment	Self-rating Anxiety Scale (SAS)	32	2 min	normal	2022-06-21 10:31:57	Finish	1	1	2	1	4	1	1	2	2	1	1	1	1	1	2	3	3	1	1	2
				Early pregnancy	Maternal mental health assessment	Self-rating Anxiety Scale (SAS)	21	2 min	normal	2022-06-21 10:32:04	Finish	1	1	1	1	1	1	1	1	1	2	1	1	1	1	1	1	1	1	1	1
				Early pregnancy	Maternal mental health assessment	Self-rating Anxiety Scale (SAS)	25	2 min	normal	2022-06-21 10:40:47	Finish	1	1	1	1	2	1	1	1	1	1	1	1	1	1	2	2	1	1	2	2
				Mid-pregnancy	Maternal mental health assessment	Self-rating Anxiety Scale (SAS)	21	2 min	normal	2022-06-21 10:42:27	Finish	1	1	1	1	1	1	1	1	1	1	1	1	1	1	1	2	1	1	1	1
				Early pregnancy	Maternal mental health assessment	Self-rating Anxiety Scale (SAS)	32	28 min	normal	2022-06-21 10:48:10	Finish	1	1	1	1	4	1	2	1	3	1	1	1	2	1	1	3	3	1	2	1
				Early pregnancy	Maternal mental health assessment	Self-rating Anxiety Scale (SAS)	27	2 min	normal	2022-06-21 10:55:01	Finish	1	1	2	1	1	1	2	3	1	2	2	1	1	1	2	1	1	1	1	1
				Early pregnancy	Maternal mental health assessment	Self-rating Anxiety Scale (SAS)	35	3 min	normal	2022-06-21 11:04:48	Finish	2	1	1	1	3	1	1	1	2	1	1	1	4	1	1	3	4	2	3	1
				Early pregnancy	Maternal mental health assessment	Self-rating Anxiety Scale (SAS)	25	2 min	normal	2022-06-21 11:06:12	Finish	1	1	1	1	1	1	1	1	1	1	1	1	1	1	1	3	1	2	3	1
				Late pregnancy	Maternal mental health assessment	Self-rating Anxiety Scale (SAS)	34	2 min	normal	2022-06-21 11:12:50	Finish	2	1	1	1	4	1	1	1	4	1	1	1	4	1	1	3	2	1	2	1
				Early pregnancy	Maternal mental health assessment	Self-rating Anxiety Scale (SAS)	23	2 min	normal	2022-06-21 11:21:45	Finish	1	1	1	1	4	1	1	1	1	1	1	1	1	1	1	1	1	1	1	1
				Early pregnancy	Maternal mental health assessment	Self-rating Anxiety Scale (SAS)	27	1 min	normal	2022-06-21 11:22:11	Finish	1	1	1	1	2	1	1	1	3	1	1	1	4	1	1	1	2	1	1	1
				Early pregnancy	Maternal mental health assessment	Self-rating Anxiety Scale (SAS)	29	4 min	normal	2022-06-21 11:51:08	Finish	1	1	2	1	1	1	1	2	2	1	2	1	1	1	1	2	2	1	4	1
				Early pregnancy	Maternal mental health assessment	Self-rating Anxiety Scale (SAS)	41	2 min	normal	2022-06-21 13:38:33	Finish	1	1	1	1	4	2	2	3	3	1	3	2	2	1	4	3	1	1	4	1
				Early pregnancy	Maternal mental health assessment	Self-rating Anxiety Scale (SAS)	29	2 min	normal	2022-06-21 13:55:29	Finish	1	1	1	1	2	1	1	1	4	1	1	1	4	1	1	1	2	2	1	1
				Mid-pregnancy	Maternal mental health assessment	Self-rating Anxiety Scale (SAS)	32	2 min	normal	2022-06-21 14:03:53	Finish	1	1	1	1	2	1	1	1	2	1	1	1	4	1	1	3	2	1	3	3
				Early pregnancy	Maternal mental health assessment	Self-rating Anxiety Scale (SAS)	24	2 min	normal	2022-06-21 14:45:05	Finish	1	1	1	1	1	1	1	1	2	1	1	1	1	1	2	1	2	1	2	1
				Mid-pregnancy	Maternal mental health assessment	Self-rating Anxiety Scale (SAS)	34	3 min	normal	2022-06-21 15:09:24	Finish	2	2	2	1	2	2	1	2	2	2	1	1	2	1	1	3	2	2	2	1
				Early pregnancy	Maternal mental health assessment	Self-rating Anxiety Scale (SAS)	28	3 min	normal	2022-06-21 15:15:31	Finish	1	1	1	1	1	1	1	2	1	1	1	1	4	1	3	3	1	1	1	1
				Early pregnancy	Maternal mental health assessment	Self-rating Anxiety Scale (SAS)	31	2 min	normal	2022-06-21 15:29:29	Finish	1	1	1	1	2	1	1	3	2	2	1	1	1	1	2	3	3	1	2	1
				Early pregnancy	Maternal mental health assessment	Self-rating Anxiety Scale (SAS)	38	10 min	normal	2022-06-21 16:10:42	Finish	3	2	2	1	1	1	1	2	2	3	2	1	1	2	2	4	2	1	3	2
				Early pregnancy	Maternal mental health assessment	Self-rating Anxiety Scale (SAS)	29	2 min	normal	2022-06-21 16:30:46	Finish	1	1	1	1	4	1	1	1	2	2	1	1	2	1	1	2	2	1	2	1
				Early pregnancy	Maternal mental health assessment	Self-rating Anxiety Scale (SAS)	26	4 min	normal	2022-06-21 16:38:15	Finish	1	1	1	1	1	1	2	1	2	1	1	1	1	1	2	1	2	1	3	1
				Early pregnancy	Maternal mental health assessment	Self-rating Anxiety Scale (SAS)	27	3 min	normal	2022-06-22 07:43:00	Finish	1	1	1	1	1	1	1	1	1	2	1	1	1	1	1	2	3	2	2	2
				Early pregnancy	Maternal mental health assessment	Self-rating Anxiety Scale (SAS)	34	1 min	normal	2022-06-22 07:54:49	Finish	1	1	1	1	4	1	2	1	4	1	1	1	4	1	1	1	4	1	2	1
				Mid-pregnancy	Maternal mental health assessment	Self-rating Anxiety Scale (SAS)	21	2 min	normal	2022-06-22 07:55:53	Finish	1	1	1	1	1	1	1	2	1	1	1	1	1	1	1	1	1	1	1	1
				Early pregnancy	Maternal mental health assessment	Self-rating Anxiety Scale (SAS)	42	1 min	normal	2022-06-22 08:14:27	Finish	2	2	1	1	2	2	2	3	3	2	2	2	3	2	2	3	2	2	2	2
				Early pregnancy	Maternal mental health assessment	Self-rating Anxiety Scale (SAS)	28	2 min	normal	2022-06-22 08:22:32	Finish	2	1	1	1	4	1	1	2	1	2	1	1	1	1	1	2	2	1	1	1
				Early pregnancy	Maternal mental health assessment	Self-rating Anxiety Scale (SAS)	23	2 min	normal	2022-06-22 08:29:16	Finish	1	1	1	1	2	1	1	1	1	1	1	1	1	1	1	1	2	1	2	1
				Early pregnancy	Maternal mental health assessment	Self-rating Anxiety Scale (SAS)	23	2 min	normal	2022-06-22 08:32:45	Finish	1	1	1	1	1	1	1	1	1	1	1	1	4	1	1	1	1	1	1	1
				Early pregnancy	Maternal mental health assessment	Self-rating Anxiety Scale (SAS)	31	3 min	normal	2022-06-22 08:32:46	Finish	1	1	1	1	4	1	1	1	2	1	1	1	4	1	1	1	4	1	2	1
				Early pregnancy	Maternal mental health assessment	Self-rating Anxiety Scale (SAS)	24	2 min	normal	2022-06-22 08:42:26	Finish	1	1	1	1	1	1	2	2	1	1	2	1	1	1	1	2	1	1	1	1
				Late pregnancy	Maternal mental health assessment	Self-rating Anxiety Scale (SAS)	45	2 min	mild	2022-06-22 08:57:47	Finish	1	1	2	2	4	1	1	2	3	3	1	2	4	2	3	3	3	1	4	2
				Early pregnancy	Maternal mental health assessment	Self-rating Anxiety Scale (SAS)	41	2 min	normal	2022-06-22 09:16:34	Finish	2	2	2	2	3	1	2	2	2	2	1	1	2	2	2	3	2	2	3	3
				Early pregnancy	Maternal mental health assessment	Self-rating Anxiety Scale (SAS)	30	2 min	normal	2022-06-22 09:20:31	Finish	2	1	1	1	1	1	1	2	2	1	1	1	1	1	2	2	2	4	2	1
				Early pregnancy	Maternal mental health assessment	Self-rating Anxiety Scale (SAS)	27	2 min	normal	2022-06-22 09:26:21	Finish	1	1	1	1	1	1	1	1	4	1	1	1	1	1	2	2	2	1	1	2
				Early pregnancy	Maternal mental health assessment	Self-rating Anxiety Scale (SAS)	32	2 min	normal	2022-06-22 09:34:17	Finish	2	2	1	1	4	1	1	1	1	1	1	1	1	1	4	4	1	2	1	1
				Early pregnancy	Maternal mental health assessment	Self-rating Anxiety Scale (SAS)	26	4 min	normal	2022-06-22 09:39:56	Finish	1	1	1	1	1	1	2	2	1	1	1	1	1	1	1	2	2	1	2	2
				Early pregnancy	Maternal mental health assessment	Self-rating Anxiety Scale (SAS)	34	2 min	normal	2022-06-22 09:42:07	Finish	2	1	1	1	2	1	1	1	3	1	1	2	3	1	2	3	2	1	2	3
				Early pregnancy	Maternal mental health assessment	Self-rating Anxiety Scale (SAS)	33	2 min	normal	2022-06-22 09:55:46	Finish	2	1	1	1	2	1	2	2	2	2	1	1	2	1	2	1	4	1	3	1
				Early pregnancy	Maternal mental health assessment	Self-rating Anxiety Scale (SAS)	32	1 min	normal	2022-06-22 10:10:21	Finish	1	1	1	1	4	1	1	1	2	2	1	1	2	1	1	3	3	1	2	2
				Early pregnancy	Maternal mental health assessment	Self-rating Anxiety Scale (SAS)	38	3 min	normal	2022-06-22 10:11:56	Finish	1	1	2	2	4	1	2	2	4	1	1	1	1	1	3	3	3	1	3	1
				Early pregnancy	Maternal mental health assessment	Self-rating Anxiety Scale (SAS)	20	2 min	normal	2022-06-22 10:26:34	Finish	1	1	1	1	1	1	1	1	1	1	1	1	1	1	1	1	1	1	1	1
				Mid-pregnancy	Maternal mental health assessment	Self-rating Anxiety Scale (SAS)	30	8 min	normal	2022-06-22 10:28:55	Finish	1	1	1	1	1	1	1	1	1	1	4	1	4	1	1	2	2	1	2	2
				Early pregnancy	Maternal mental health assessment	Self-rating Anxiety Scale (SAS)	29	3 min	normal	2022-06-22 10:37:27	Finish	4	1	1	1	4	1	1	1	4	1	1	1	1	1	1	1	1	1	1	1
				Early pregnancy	Maternal mental health assessment	Self-rating Anxiety Scale (SAS)	38	2 min	normal	2022-06-22 10:38:23	Finish	1	1	1	1	4	1	1	1	4	2	1	2	3	1	1	2	3	2	4	2
				Early pregnancy	Maternal mental health assessment	Self-rating Anxiety Scale (SAS)	38	2 min	normal	2022-06-22 10:52:35	Finish	2	1	2	1	2	1	1	4	3	2	1	2	3	1	2	3	2	1	2	2
				Mid-pregnancy	Maternal mental health assessment	Self-rating Anxiety Scale (SAS)	35	2 min	normal	2022-06-22 10:57:21	Finish	1	1	1	2	4	2	1	2	2	1	2	2	2	1	2	2	1	4	1	1
				Early pregnancy	Maternal mental health assessment	Self-rating Anxiety Scale (SAS)	31	2 min	normal	2022-06-22 11:01:48	Finish	1	1	1	1	4	1	1	2	1	1	1	1	4	1	2	2	2	1	2	1
				Early pregnancy	Maternal mental health assessment	Self-rating Anxiety Scale (SAS)	45	1 min	mild	2022-06-22 11:12:08	Finish	2	2	1	2	4	2	2	2	3	2	2	2	3	2	2	2	3	2	3	2
				Early pregnancy	Maternal mental health assessment	Self-rating Anxiety Scale (SAS)	29	3 min	normal	2022-06-22 11:12:31	Finish	1	1	1	1	2	1	1	1	2	1	1	1	4	1	1	3	2	1	2	1
				Early pregnancy	Maternal mental health assessment	Self-rating Anxiety Scale (SAS)	35	1 min	normal	2022-06-22 11:13:19	Finish	1	1	1	1	4	1	1	1	4	1	1	1	4	1	1	1	4	1	4	1
				Mid-pregnancy	Maternal mental health assessment	Self-rating Anxiety Scale (SAS)	27	2 min	normal	2022-06-22 11:17:27	Finish	1	1	1	1	2	1	1	1	2	1	1	1	1	1	2	3	1	2	2	1
				Early pregnancy	Maternal mental health assessment	Self-rating Anxiety Scale (SAS)	24	11 min	normal	2022-06-22 11:25:23	Finish	1	1	1	1	1	1	1	1	2	1	1	1	1	1	2	1	2	1	2	1
				Early pregnancy	Maternal mental health assessment	Self-rating Anxiety Scale (SAS)	42	2 min	normal	2022-06-22 11:29:03	Finish	1	2	2	1	4	2	2	2	3	3	2	1	3	1	4	2	2	1	3	1
				Early pregnancy	Maternal mental health assessment	Self-rating Anxiety Scale (SAS)	36	4 min	normal	2022-06-22 11:30:22	Finish	2	2	2	2	3	1	1	2	2	2	1	1	1	1	2	3	2	2	3	1
				Late pregnancy	Maternal mental health assessment	Self-rating Anxiety Scale (SAS)	33	2 min	normal	2022-06-22 11:30:24	Finish	1	1	1	1	4	1	1	1	4	1	1	1	4	1	1	1	2	1	4	1
				Mid-pregnancy	Maternal mental health assessment	Self-rating Anxiety Scale (SAS)	26	3 min	normal	2022-06-22 11:33:06	Finish	1	1	1	1	1	1	2	1	1	1	1	1	2	1	3	2	1	1	2	1
				Early pregnancy	Maternal mental health assessment	Self-rating Anxiety Scale (SAS)	37	1 min	normal	2022-06-22 11:40:46	Finish	1	1	1	1	4	1	1	3	2	2	2	2	2	1	1	3	2	3	2	2
				Mid-pregnancy	Maternal mental health assessment	Self-rating Anxiety Scale (SAS)	34	117 min	normal	2022-06-22 13:32:48	Finish	1	1	1	1	4	1	1	1	2	2	1	1	4	1	1	1	4	2	2	2
				Early pregnancy	Maternal mental health assessment	Self-rating Anxiety Scale (SAS)	35	2 min	normal	2022-06-22 13:35:18	Finish	2	1	2	1	2	1	1	3	2	2	2	1	3	1	2	2	3	1	2	1
				Early pregnancy	Maternal mental health assessment	Self-rating Anxiety Scale (SAS)	26	3 min	normal	2022-06-22 13:52:48	Finish	2	1	1	1	1	2	2	2	1	1	2	1	1	1	1	1	1	1	2	1
				Early pregnancy	Maternal mental health assessment	Self-rating Anxiety Scale (SAS)	27	2 min	normal	2022-06-22 14:21:50	Finish	1	1	1	1	1	1	1	1	2	1	1	1	4	1	2	1	2	1	2	1
				Early pregnancy	Maternal mental health assessment	Self-rating Anxiety Scale (SAS)	24	2 min	normal	2022-06-22 14:36:07	Finish	1	1	1	1	4	1	1	1	1	1	1	1	1	1	1	2	1	1	1	1
				Early pregnancy	Maternal mental health assessment	Self-rating Anxiety Scale (SAS)	35	1 min	normal	2022-06-22 15:11:22	Finish	1	1	1	1	4	1	1	1	4	1	1	1	4	1	1	1	4	1	4	1
				Early pregnancy	Maternal mental health assessment	Self-rating Anxiety Scale (SAS)	35	1 min	normal	2022-06-23 08:00:49	Finish	1	1	1	1	4	1	1	1	4	1	1	1	4	1	1	1	4	1	4	1
				Mid-pregnancy	Maternal mental health assessment	Self-rating Anxiety Scale (SAS)	34	2 min	normal	2022-06-23 08:43:42	Finish	1	1	1	1	2	1	2	1	2	2	1	1	2	1	2	3	4	2	2	2
				Early pregnancy	Maternal mental health assessment	Self-rating Anxiety Scale (SAS)	39	2 min	normal	2022-06-23 08:51:34	Finish	2	2	2	2	3	1	2	2	3	1	1	1	4	1	1	3	3	2	2	1
				Early pregnancy	Maternal mental health assessment	Self-rating Anxiety Scale (SAS)	23	2 min	normal	2022-06-23 09:00:08	Finish	1	1	1	1	1	1	1	2	1	1	1	1	1	1	2	2	1	1	1	1
				Early pregnancy	Maternal mental health assessment	Self-rating Anxiety Scale (SAS)	27	2 min	normal	2022-06-23 09:07:18	Finish	1	1	1	1	1	1	1	1	1	1	1	1	4	1	2	1	3	1	2	1
				Early pregnancy	Maternal mental health assessment	Self-rating Anxiety Scale (SAS)	29	3 min	normal	2022-06-23 09:20:04	Finish	1	1	1	1	4	1	1	1	4	1	1	1	1	1	1	2	2	1	2	1
				Early pregnancy	Maternal mental health assessment	Self-rating Anxiety Scale (SAS)	20	2 min	normal	2022-06-23 09:25:01	Finish	1	1	1	1	1	1	1	1	1	1	1	1	1	1	1	1	1	1	1	1
				Early pregnancy	Maternal mental health assessment	Self-rating Anxiety Scale (SAS)	28	7 min	normal	2022-06-23 09:36:37	Finish	2	1	1	1	1	1	1	3	1	1	2	1	1	1	2	1	2	2	2	1
				Early pregnancy	Maternal mental health assessment	Self-rating Anxiety Scale (SAS)	30	2 min	normal	2022-06-23 09:46:02	Finish	1	1	1	1	2	1	1	3	2	1	1	1	2	1	1	3	2	1	3	1
				Early pregnancy	Maternal mental health assessment	Self-rating Anxiety Scale (SAS)	30	11 min	normal	2022-06-23 09:47:46	Finish	1	1	1	1	1	1	2	1	1	2	2	1	1	2	2	2	1	3	2	2
				Early pregnancy	Maternal mental health assessment	Self-rating Anxiety Scale (SAS)	43	7 min	mild	2022-06-23 09:50:14	Finish	2	2	2	2	4	1	1	3	2	2	1	3	2	2	4	2	3	2	1	2
				Early pregnancy	Maternal mental health assessment	Self-rating Anxiety Scale (SAS)	38	3 min	normal	2022-06-23 10:03:50	Finish	1	1	1	1	4	1	4	1	4	2	2	1	2	1	2	1	2	2	3	2
				Early pregnancy	Maternal mental health assessment	Self-rating Anxiety Scale (SAS)	25	2 min	normal	2022-06-23 10:10:20	Finish	1	1	1	1	3	1	1	2	2	1	1	1	1	1	1	2	1	1	1	1
				Early pregnancy	Maternal mental health assessment	Self-rating Anxiety Scale (SAS)	30	2 min	normal	2022-06-23 10:12:54	Finish	1	1	1	1	1	2	2	3	2	2	1	1	1	1	2	2	1	1	2	2
				Early pregnancy	Maternal mental health assessment	Self-rating Anxiety Scale (SAS)	36	1 min	normal	2022-06-23 10:24:10	Finish	1	1	1	1	4	1	1	2	3	1	1	1	4	1	2	2	2	2	4	1
				Mid-pregnancy	Maternal mental health assessment	Self-rating Anxiety Scale (SAS)	28	14 min	normal	2022-06-23 10:43:25	Finish	1	1	1	1	4	1	1	1	2	1	1	1	1	1	1	3	1	3	1	1
				Early pregnancy	Maternal mental health assessment	Self-rating Anxiety Scale (SAS)	36	15 min	normal	2022-06-23 10:47:56	Finish	2	1	1	1	4	1	1	1	4	1	1	1	4	1	1	1	4	1	4	1
				Early pregnancy	Maternal mental health assessment	Self-rating Anxiety Scale (SAS)	25	3 min	normal	2022-06-23 10:52:06	Finish	2	1	1	1	1	1	1	1	1	1	1	1	4	1	1	2	1	1	1	1
				Early pregnancy	Maternal mental health assessment	Self-rating Anxiety Scale (SAS)	31	3 min	normal	2022-06-23 10:53:16	Finish	1	1	1	1	1	1	1	2	2	1	2	1	2	1	3	3	2	1	2	2
				Early pregnancy	Maternal mental health assessment	Self-rating Anxiety Scale (SAS)	36	2 min	normal	2022-06-23 10:53:22	Finish	1	1	1	1	4	1	1	1	4	1	1	1	4	1	1	2	4	1	4	1
				Early pregnancy	Maternal mental health assessment	Self-rating Anxiety Scale (SAS)	35	2 min	normal	2022-06-23 11:04:52	Finish	1	1	1	1	4	1	1	1	4	1	1	1	4	1	1	1	4	1	4	1
				Early pregnancy	Maternal mental health assessment	Self-rating Anxiety Scale (SAS)	30	2 min	normal	2022-06-23 11:43:15	Finish	2	1	1	1	1	1	2	2	3	1	2	1	1	1	1	1	2	1	3	2
				Early pregnancy	Maternal mental health assessment	Self-rating Anxiety Scale (SAS)	33	2 min	normal	2022-06-23 12:02:36	Finish	1	1	1	1	4	1	1	2	2	1	1	2	4	1	1	2	2	1	3	1
				Early pregnancy	Maternal mental health assessment	Self-rating Anxiety Scale (SAS)	27	2 min	normal	2022-06-23 13:53:57	Finish	1	1	1	1	2	1	1	2	1	1	1	1	1	1	1	4	3	1	1	1
				Early pregnancy	Maternal mental health assessment	Self-rating Anxiety Scale (SAS)	31	2 min	normal	2022-06-23 14:07:33	Finish	1	1	1	1	1	1	1	2	1	2	1	2	4	1	1	3	3	1	1	2
				Early pregnancy	Maternal mental health assessment	Self-rating Anxiety Scale (SAS)	28	2 min	normal	2022-06-23 14:42:19	Finish	1	1	1	1	2	1	1	2	2	1	1	1	2	1	1	2	3	1	2	1
				Early pregnancy	Maternal mental health assessment	Self-rating Anxiety Scale (SAS)	29	1 min	normal	2022-06-23 15:09:58	Finish	1	1	1	1	4	1	1	1	1	1	1	1	4	1	1	1	2	2	2	1
				Mid-pregnancy	Maternal mental health assessment	Self-rating Anxiety Scale (SAS)	38	2 min	normal	2022-06-23 15:20:05	Finish	2	2	1	1	4	1	1	1	4	1	1	1	4	1	1	1	4	1	4	2
				Early pregnancy	Maternal mental health assessment	Self-rating Anxiety Scale (SAS)	29	3 min	normal	2022-06-23 15:22:16	Finish	1	1	1	1	1	1	1	2	2	1	1	1	1	1	2	3	4	1	2	1
				Late pregnancy	Maternal mental health assessment	Self-rating Anxiety Scale (SAS)	29	2 min	normal	2022-06-23 15:29:47	Finish	1	1	1	1	2	1	1	1	2	1	1	1	4	1	1	3	2	1	2	1
				Early pregnancy	Maternal mental health assessment	Self-rating Anxiety Scale (SAS)	28	8 min	normal	2022-06-23 15:35:19	Finish	2	2	2	1	2	1	1	2	2	2	1	1	1	1	1	1	1	1	2	1
				Early pregnancy	Maternal mental health assessment	Self-rating Anxiety Scale (SAS)	33	1 min	normal	2022-06-23 15:38:56	Finish	1	1	1	1	4	1	1	1	4	1	1	1	4	1	1	1	3	2	2	1
				Mid-pregnancy	Maternal mental health assessment	Self-rating Anxiety Scale (SAS)	38	2 min	normal	2022-06-23 15:49:18	Finish	1	2	1	1	4	1	1	1	4	1	1	1	4	1	1	3	4	1	4	1
				Mid-pregnancy	Maternal mental health assessment	Self-rating Anxiety Scale (SAS)	30	2 min	normal	2022-06-23 16:00:17	Finish	2	1	1	1	2	1	1	1	3	2	1	1	2	1	1	3	2	1	2	1
				Early pregnancy	Maternal mental health assessment	Self-rating Anxiety Scale (SAS)	34	2 min	normal	2022-06-24 07:42:32	Finish	2	2	1	1	2	1	1	1	2	2	2	2	2	1	2	2	2	2	3	1
				Early pregnancy	Maternal mental health assessment	Self-rating Anxiety Scale (SAS)	20	2 min	normal	2022-06-24 08:46:48	Finish	1	1	1	1	1	1	1	1	1	1	1	1	1	1	1	1	1	1	1	1
				Early pregnancy	Maternal mental health assessment	Self-rating Anxiety Scale (SAS)	22	6 min	normal	2022-06-24 09:20:30	Finish	1	1	1	1	1	1	1	1	1	1	1	1	1	1	1	2	1	1	2	1
				Early pregnancy	Maternal mental health assessment	Self-rating Anxiety Scale (SAS)	38	2 min	normal	2022-06-24 09:24:18	Finish	2	2	1	1	2	1	2	2	3	1	2	2	2	1	2	3	3	1	3	2
				Early pregnancy	Maternal mental health assessment	Self-rating Anxiety Scale (SAS)	24	2 min	normal	2022-06-24 09:36:35	Finish	1	1	1	1	4	1	1	1	1	1	1	1	1	1	1	2	1	1	1	1
				Early pregnancy	Maternal mental health assessment	Self-rating Anxiety Scale (SAS)	26	2 min	normal	2022-06-24 09:40:19	Finish	2	1	1	1	1	1	1	2	2	2	1	1	1	1	1	2	2	1	1	1
				Early pregnancy	Maternal mental health assessment	Self-rating Anxiety Scale (SAS)	29	2 min	normal	2022-06-24 09:50:59	Finish	1	1	1	1	1	1	2	2	2	1	2	2	1	1	1	2	2	1	2	2
				Early pregnancy	Maternal mental health assessment	Self-rating Anxiety Scale (SAS)	35	2 min	normal	2022-06-24 09:52:28	Finish	1	1	1	1	4	1	2	2	4	1	1	2	3	1	1	2	4	1	1	1
				Early pregnancy	Maternal mental health assessment	Self-rating Anxiety Scale (SAS)	30	3 min	normal	2022-06-24 09:54:14	Finish	1	1	1	1	4	1	1	1	2	1	1	1	1	2	1	1	3	1	3	2
				Early pregnancy	Maternal mental health assessment	Self-rating Anxiety Scale (SAS)	26	2 min	normal	2022-06-24 09:59:21	Finish	1	1	1	1	2	1	1	2	3	1	1	1	1	1	2	1	1	1	2	1
				Early pregnancy	Maternal mental health assessment	Self-rating Anxiety Scale (SAS)	30	2 min	normal	2022-06-24 10:02:27	Finish	1	1	1	1	1	1	2	2	1	2	2	1	1	1	2	3	1	2	2	2
				Early pregnancy	Maternal mental health assessment	Self-rating Anxiety Scale (SAS)	20	2 min	normal	2022-06-24 10:03:19	Finish	1	1	1	1	1	1	1	1	1	1	1	1	1	1	1	1	1	1	1	1
				Early pregnancy	Maternal mental health assessment	Self-rating Anxiety Scale (SAS)	27	8 min	normal	2022-06-24 10:09:17	Finish	1	1	1	1	1	2	1	1	4	1	1	1	1	1	1	2	2	1	2	1
				Early pregnancy	Maternal mental health assessment	Self-rating Anxiety Scale (SAS)	27	3 min	normal	2022-06-24 10:09:21	Finish	2	1	1	1	2	1	1	1	2	1	1	1	1	1	2	2	2	1	2	1
				Early pregnancy	Maternal mental health assessment	Self-rating Anxiety Scale (SAS)	33	2 min	normal	2022-06-24 10:09:32	Finish	1	1	1	1	4	1	1	2	4	1	1	1	4	1	2	1	3	1	1	1
				Early pregnancy	Maternal mental health assessment	Self-rating Anxiety Scale (SAS)	41	2 min	normal	2022-06-24 10:13:45	Finish	2	2	2	1	3	1	2	2	3	3	2	1	3	1	2	2	3	2	3	1
				Mid-pregnancy	Maternal mental health assessment	Self-rating Anxiety Scale (SAS)	28	2 min	normal	2022-06-24 10:19:05	Finish	1	1	1	1	1	1	1	2	1	1	1	1	1	1	1	3	2	1	3	3
				Early pregnancy	Maternal mental health assessment	Self-rating Anxiety Scale (SAS)	23	2 min	normal	2022-06-24 10:22:13	Finish	1	1	1	1	1	1	1	1	1	2	1	1	2	1	2	1	1	1	1	1
				Early pregnancy	Maternal mental health assessment	Self-rating Anxiety Scale (SAS)	29	2 min	normal	2022-06-24 10:25:55	Finish	1	1	1	1	4	1	1	1	2	1	1	1	2	1	1	3	2	1	2	1
				Early pregnancy	Maternal mental health assessment	Self-rating Anxiety Scale (SAS)	49	2 min	mild	2022-06-24 10:33:10	Finish	3	2	2	2	3	1	2	3	3	2	3	2	3	3	2	3	3	2	3	2
				Early pregnancy	Maternal mental health assessment	Self-rating Anxiety Scale (SAS)	30	3 min	normal	2022-06-24 10:34:35	Finish	2	1	1	1	4	1	1	2	2	1	1	1	1	1	1	2	2	1	2	2
				Early pregnancy	Maternal mental health assessment	Self-rating Anxiety Scale (SAS)	28	2 min	normal	2022-06-24 10:35:51	Finish	1	1	1	1	1	1	1	1	2	1	1	1	2	1	4	3	2	1	1	1
				Mid-pregnancy	Maternal mental health assessment	Self-rating Anxiety Scale (SAS)	51	2 min	中度	2022-06-24 10:46:03	Finish	3	3	3	2	3	2	2	2	3	3	3	2	3	2	2	3	3	2	3	2
				Early pregnancy	Maternal mental health assessment	Self-rating Anxiety Scale (SAS)	35	2 min	normal	2022-06-24 10:51:06	Finish	2	2	1	1	2	1	1	3	2	1	1	1	2	1	3	2	3	1	3	2
				Early pregnancy	Maternal mental health assessment	Self-rating Anxiety Scale (SAS)	38	2 min	normal	2022-06-24 10:55:43	Finish	2	1	2	1	2	1	2	2	2	2	2	2	2	1	2	2	3	2	3	2
				Early pregnancy	Maternal mental health assessment	Self-rating Anxiety Scale (SAS)	22	2 min	normal	2022-06-24 10:57:35	Finish	1	1	1	1	1	1	1	1	1	2	1	1	2	1	1	1	1	1	1	1
				Early pregnancy	Maternal mental health assessment	Self-rating Anxiety Scale (SAS)	33	2 min	normal	2022-06-24 11:03:25	Finish	2	1	2	1	1	1	1	1	1	4	1	1	4	1	1	2	4	1	1	2
				Early pregnancy	Maternal mental health assessment	Self-rating Anxiety Scale (SAS)	29	2 min	normal	2022-06-24 11:12:00	Finish	1	1	1	1	1	1	2	1	2	1	2	1	1	1	1	2	3	2	2	2
				Early pregnancy	Maternal mental health assessment	Self-rating Anxiety Scale (SAS)	26	2 min	normal	2022-06-24 11:15:08	Finish	1	1	1	1	4	1	1	1	1	1	1	1	4	1	1	1	1	1	1	1
				Early pregnancy	Maternal mental health assessment	Self-rating Anxiety Scale (SAS)	34	2 min	normal	2022-06-24 11:20:07	Finish	2	1	1	1	2	2	2	2	2	2	2	2	2	1	2	3	1	1	2	1
				Early pregnancy	Maternal mental health assessment	Self-rating Anxiety Scale (SAS)	29	4 min	normal	2022-06-24 11:23:09	Finish	1	1	1	1	1	1	1	2	4	1	1	2	2	1	1	2	2	1	2	1
				Early pregnancy	Maternal mental health assessment	Self-rating Anxiety Scale (SAS)	23	2 min	normal	2022-06-24 11:27:29	Finish	1	1	1	1	1	1	1	1	1	2	1	1	1	1	1	2	1	2	1	1
				Early pregnancy	Maternal mental health assessment	Self-rating Anxiety Scale (SAS)	36	4 min	normal	2022-06-24 11:49:43	Finish	2	2	2	1	3	1	2	1	2	1	2	2	2	1	2	2	2	2	2	2
				Early pregnancy	Maternal mental health assessment	Self-rating Anxiety Scale (SAS)	37	2 min	normal	2022-06-24 12:09:05	Finish	2	2	2	1	3	1	2	2	2	2	2	2	2	1	2	2	2	2	2	1
				Mid-pregnancy	Maternal mental health assessment	Self-rating Anxiety Scale (SAS)	26	172 min	normal	2022-06-24 13:42:11	Finish	1	1	1	1	2	1	1	2	1	1	1	1	1	1	1	3	2	1	2	1
				Early pregnancy	Maternal mental health assessment	Self-rating Anxiety Scale (SAS)	32	10 min	normal	2022-06-24 13:52:15	Finish	1	1	1	1	4	1	1	2	2	1	1	1	2	1	3	3	2	1	2	1
				Early pregnancy	Maternal mental health assessment	Self-rating Anxiety Scale (SAS)	25	2 min	normal	2022-06-24 14:21:41	Finish	2	1	1	1	2	1	1	1	1	1	1	1	1	1	1	1	1	1	3	2
				Early pregnancy	Maternal mental health assessment	Self-rating Anxiety Scale (SAS)	42	3 min	normal	2022-06-24 14:23:23	Finish	2	2	2	1	3	1	3	3	3	2	1	1	2	1	4	3	2	2	2	2
				Early pregnancy	Maternal mental health assessment	Self-rating Anxiety Scale (SAS)	36	1 min	normal	2022-06-24 14:28:14	Finish	1	1	1	1	4	1	1	1	4	1	1	1	4	1	1	3	4	1	3	1
				Early pregnancy	Maternal mental health assessment	Self-rating Anxiety Scale (SAS)	31	4 min	normal	2022-06-24 14:37:26	Finish	1	1	1	1	1	1	2	2	2	1	2	1	2	1	2	1	4	1	2	2
				Early pregnancy	Maternal mental health assessment	Self-rating Anxiety Scale (SAS)	27	2 min	normal	2022-06-24 14:40:17	Finish	1	1	1	1	2	1	2	1	2	1	1	1	1	1	1	2	2	1	2	2
				Early pregnancy	Maternal mental health assessment	Self-rating Anxiety Scale (SAS)	35	2 min	normal	2022-06-24 14:43:57	Finish	1	1	1	1	2	1	2	2	2	1	2	2	4	1	2	2	3	2	2	1
				Early pregnancy	Maternal mental health assessment	Self-rating Anxiety Scale (SAS)	23	2 min	normal	2022-06-24 14:57:02	Finish	1	1	1	1	1	1	1	1	1	1	1	1	1	1	1	2	1	1	3	1
				Mid-pregnancy	Maternal mental health assessment	Self-rating Anxiety Scale (SAS)	42	3 min	normal	2022-06-24 14:57:48	Finish	3	4	3	2	2	1	1	1	3	2	2	2	2	1	2	3	1	2	3	2
				Early pregnancy	Maternal mental health assessment	Self-rating Anxiety Scale (SAS)	27	2 min	normal	2022-06-24 15:21:36	Finish	1	1	1	1	1	1	1	1	1	1	1	1	4	1	1	3	3	1	1	1
				Early pregnancy	Maternal mental health assessment	Self-rating Anxiety Scale (SAS)	28	3 min	normal	2022-06-24 15:23:04	Finish	1	1	1	1	2	1	1	1	2	1	2	1	1	1	2	3	2	1	2	1
				Early pregnancy	Maternal mental health assessment	Self-rating Anxiety Scale (SAS)	42	3 min	normal	2022-06-24 15:39:06	Finish	3	2	2	1	2	2	1	2	2	3	1	2	3	1	1	3	3	3	3	2
				Early pregnancy	Maternal mental health assessment	Self-rating Anxiety Scale (SAS)	33	1 min	normal	2022-06-24 15:47:19	Finish	1	1	1	1	1	1	1	2	1	1	1	1	4	1	3	3	2	2	4	1
				Early pregnancy	Maternal mental health assessment	Self-rating Anxiety Scale (SAS)	23	1 min	normal	2022-06-24 15:51:30	Finish	1	1	1	1	1	1	1	1	1	2	1	1	1	1	1	1	2	1	2	1
				Early pregnancy	Maternal mental health assessment	Self-rating Anxiety Scale (SAS)	29	1 min	normal	2022-06-24 16:45:31	Finish	1	1	1	1	2	1	1	2	1	2	1	1	4	1	1	1	2	1	3	1
				Early pregnancy	Maternal mental health assessment	Self-rating Anxiety Scale (SAS)	47	3 min	mild	2022-06-25 18:25:49	Finish	3	2	2	3	3	1	2	2	2	3	2	2	3	2	3	3	2	2	3	2
				Early pregnancy	Maternal mental health assessment	Self-rating Anxiety Scale (SAS)	40	11 min	normal	2022-06-27 08:03:32	Finish	1	1	1	1	1	1	1	3	2	2	2	2	2	1	3	3	3	3	4	3
				Early pregnancy	Maternal mental health assessment	Self-rating Anxiety Scale (SAS)	26	4 min	normal	2022-06-27 08:14:41	Finish	1	1	1	1	1	1	1	1	1	2	1	1	1	1	4	2	1	1	2	1
				Early pregnancy	Maternal mental health assessment	Self-rating Anxiety Scale (SAS)	32	4 min	normal	2022-06-27 08:21:55	Finish	2	2	2	1	2	2	1	2	2	2	2	1	1	1	1	1	2	1	2	2
				Early pregnancy	Maternal mental health assessment	Self-rating Anxiety Scale (SAS)	25	2 min	normal	2022-06-27 08:30:50	Finish	1	1	1	1	1	1	1	1	1	1	1	1	2	1	2	2	1	1	3	1
				Early pregnancy	Maternal mental health assessment	Self-rating Anxiety Scale (SAS)	28	2 min	normal	2022-06-27 08:46:21	Finish	2	1	1	1	1	1	1	2	1	2	1	1	1	1	2	3	1	2	1	2
				Early pregnancy	Maternal mental health assessment	Self-rating Anxiety Scale (SAS)	26	2 min	normal	2022-06-27 08:49:24	Finish	1	1	1	1	1	1	1	2	1	1	1	2	1	1	2	3	1	1	2	1
				Early pregnancy	Maternal mental health assessment	Self-rating Anxiety Scale (SAS)	35	1 min	normal	2022-06-27 09:13:54	Finish	1	1	1	1	4	1	1	1	4	1	1	1	4	1	1	1	4	1	3	2
				Early pregnancy	Maternal mental health assessment	Self-rating Anxiety Scale (SAS)	27	2 min	normal	2022-06-27 09:13:54	Finish	1	1	1	1	4	1	1	1	2	1	2	1	1	1	1	2	1	1	2	1
				Early pregnancy	Maternal mental health assessment	Self-rating Anxiety Scale (SAS)	48	2 min	mild	2022-06-27 09:29:05	Finish	2	2	2	3	3	2	2	3	3	1	3	3	3	1	4	1	3	2	3	2
				Postpartum 42 days	Maternal mental health assessment	Self-rating Anxiety Scale (SAS)	35	3 min	normal	2022-06-27 09:36:23	Finish	2	2	1	1	1	1	1	3	3	2	1	1	4	1	1	3	2	2	2	1
				Mid-pregnancy	Maternal mental health assessment	Self-rating Anxiety Scale (SAS)	28	3 min	normal	2022-06-27 10:10:14	Finish	1	1	1	1	4	1	1	1	2	1	1	1	2	1	1	1	2	1	3	1
				Mid-pregnancy	Maternal mental health assessment	Self-rating Anxiety Scale (SAS)	29	1 min	normal	2022-06-27 10:18:45	Finish	1	1	1	1	4	1	1	1	2	1	1	1	1	1	1	3	2	1	3	1
				Early pregnancy	Maternal mental health assessment	Self-rating Anxiety Scale (SAS)	34	1 min	normal	2022-06-27 10:21:47	Finish	1	1	1	1	4	1	1	1	4	1	1	1	4	1	1	1	4	1	2	2
				Early pregnancy	Maternal mental health assessment	Self-rating Anxiety Scale (SAS)	29	2 min	normal	2022-06-27 10:40:23	Finish	1	1	1	1	1	2	1	3	1	1	1	2	1	1	2	3	1	1	2	2
				Early pregnancy	Maternal mental health assessment	Self-rating Anxiety Scale (SAS)	35	2 min	normal	2022-06-27 10:49:57	Finish	1	1	1	1	4	1	1	1	3	1	1	1	2	1	2	2	3	3	3	2
				Early pregnancy	Maternal mental health assessment	Self-rating Anxiety Scale (SAS)	41	2 min	normal	2022-06-27 10:55:10	Finish	2	2	2	1	1	2	3	3	3	3	2	2	2	1	1	2	2	3	3	1
				Early pregnancy	Maternal mental health assessment	Self-rating Anxiety Scale (SAS)	24	1 min	normal	2022-06-27 10:55:41	Finish	1	1	1	1	1	1	1	1	1	2	1	1	1	1	2	1	1	1	2	2
				Early pregnancy	Maternal mental health assessment	Self-rating Anxiety Scale (SAS)	33	1 min	normal	2022-06-27 11:01:45	Finish	1	2	2	1	1	2	3	2	1	2	2	1	3	2	2	2	1	1	1	1
				Early pregnancy	Maternal mental health assessment	Self-rating Anxiety Scale (SAS)	32	2 min	normal	2022-06-27 11:24:42	Finish	2	1	2	1	2	1	1	1	2	2	2	2	1	1	2	2	2	2	2	1
				Early pregnancy	Maternal mental health assessment	Self-rating Anxiety Scale (SAS)	25	16 min	normal	2022-06-27 11:32:58	Finish	1	1	1	1	1	1	1	1	4	1	1	1	1	1	1	3	1	1	1	1
				Early pregnancy	Maternal mental health assessment	Self-rating Anxiety Scale (SAS)	34	3 min	normal	2022-06-27 13:41:40	Finish	1	1	2	2	4	1	1	1	2	1	2	2	4	1	1	3	1	1	2	1
				Early pregnancy	Maternal mental health assessment	Self-rating Anxiety Scale (SAS)	33	2 min	normal	2022-06-27 13:44:34	Finish	1	1	1	1	4	2	1	2	2	1	1	1	2	1	1	3	2	1	3	2
				Mid-pregnancy	Maternal mental health assessment	Self-rating Anxiety Scale (SAS)	46	3 min	mild	2022-06-27 13:46:34	Finish	3	2	3	3	2	1	2	3	4	1	1	2	3	2	2	2	4	1	3	2
				Early pregnancy	Maternal mental health assessment	Self-rating Anxiety Scale (SAS)	33	4 min	normal	2022-06-27 13:46:38	Finish	2	1	1	1	1	1	1	2	2	2	2	2	2	1	2	3	2	2	2	1
				Early pregnancy	Maternal mental health assessment	Self-rating Anxiety Scale (SAS)	23	2 min	normal	2022-06-27 14:02:54	Finish	1	1	1	1	1	1	1	1	1	1	1	1	1	1	2	2	1	1	2	1
				Early pregnancy	Maternal mental health assessment	Self-rating Anxiety Scale (SAS)	21	2 min	normal	2022-06-27 14:05:23	Finish	1	1	1	1	1	1	1	2	1	1	1	1	1	1	1	1	1	1	1	1
				Early pregnancy	Maternal mental health assessment	Self-rating Anxiety Scale (SAS)	31	2 min	normal	2022-06-27 14:08:41	Finish	2	1	1	1	4	2	1	1	2	2	1	1	1	1	1	1	4	1	2	1
				Late pregnancy	Maternal mental health assessment	Self-rating Anxiety Scale (SAS)	33	1 min	normal	2022-06-27 14:29:08	Finish	1	1	1	1	4	1	1	1	4	2	1	1	4	1	1	1	4	1	1	1
				Mid-pregnancy	Maternal mental health assessment	Self-rating Anxiety Scale (SAS)	25	3 min	normal	2022-06-27 14:30:39	Finish	1	1	1	1	2	1	1	1	2	1	1	1	2	1	1	1	2	1	2	1
				Mid-pregnancy	Maternal mental health assessment	Self-rating Anxiety Scale (SAS)	51	53 min	中度	2022-06-27 14:40:29	Finish	1	2	2	4	2	2	1	3	4	2	3	4	4	1	4	2	3	1	4	2
				Mid-pregnancy	Maternal mental health assessment	Self-rating Anxiety Scale (SAS)	25	2 min	normal	2022-06-27 14:44:55	Finish	1	1	1	1	1	1	1	1	1	1	1	1	1	1	2	2	1	4	1	1
				Early pregnancy	Maternal mental health assessment	Self-rating Anxiety Scale (SAS)	25	2 min	normal	2022-06-27 15:17:40	Finish	1	1	1	1	2	1	1	1	2	1	1	1	1	1	2	2	1	1	2	1
				Mid-pregnancy	Maternal mental health assessment	Self-rating Anxiety Scale (SAS)	31	1 min	normal	2022-06-27 15:55:02	Finish	1	1	1	1	4	1	1	1	2	1	1	1	2	1	1	3	4	1	2	1
				Early pregnancy	Maternal mental health assessment	Self-rating Anxiety Scale (SAS)	47	2 min	mild	2022-06-27 19:30:40	Finish	3	2	3	3	4	1	2	3	3	2	2	2	2	2	3	3	2	2	2	1
				Early pregnancy	Maternal mental health assessment	Self-rating Anxiety Scale (SAS)	34	2 min	normal	2022-06-28 07:47:31	Finish	2	1	1	1	4	1	1	1	4	1	1	1	2	1	2	2	3	1	3	1
				Early pregnancy	Maternal mental health assessment	Self-rating Anxiety Scale (SAS)	31	3 min	normal	2022-06-28 07:57:56	Finish	2	1	1	1	1	1	1	2	2	2	1	1	2	1	1	3	3	1	3	1
				Early pregnancy	Maternal mental health assessment	Self-rating Anxiety Scale (SAS)	38	2 min	normal	2022-06-28 08:01:15	Finish	2	2	2	1	4	1	1	1	4	1	1	1	4	1	1	1	4	1	4	1
				Early pregnancy	Maternal mental health assessment	Self-rating Anxiety Scale (SAS)	35	2 min	normal	2022-06-28 08:06:46	Finish	1	1	1	1	4	1	1	1	4	1	1	1	4	1	1	1	4	1	4	1
				Early pregnancy	Maternal mental health assessment	Self-rating Anxiety Scale (SAS)	35	1 min	normal	2022-06-28 08:25:56	Finish	1	1	1	1	4	1	1	1	4	1	1	1	4	1	1	1	4	1	4	1
				Early pregnancy	Maternal mental health assessment	Self-rating Anxiety Scale (SAS)	32	4 min	normal	2022-06-28 08:36:57	Finish	2	1	2	1	2	1	1	1	2	2	2	1	2	1	1	3	1	1	3	2
				Mid-pregnancy	Maternal mental health assessment	Self-rating Anxiety Scale (SAS)	22	2 min	normal	2022-06-28 08:52:04	Finish	1	1	1	1	1	1	1	2	1	1	1	1	1	1	1	2	1	1	1	1
				Early pregnancy	Maternal mental health assessment	Self-rating Anxiety Scale (SAS)	29	2 min	normal	2022-06-28 09:02:28	Finish	1	1	1	1	1	1	1	1	2	2	1	1	1	1	3	2	3	1	2	2
				Early pregnancy	Maternal mental health assessment	Self-rating Anxiety Scale (SAS)	20	2 min	normal	2022-06-28 09:21:04	Finish	1	1	1	1	1	1	1	1	1	1	1	1	1	1	1	1	1	1	1	1
				Early pregnancy	Maternal mental health assessment	Self-rating Anxiety Scale (SAS)	43	2 min	mild	2022-06-28 09:39:01	Finish	2	2	2	2	2	1	1	3	2	3	2	2	4	1	3	3	2	2	2	2
				Early pregnancy	Maternal mental health assessment	Self-rating Anxiety Scale (SAS)	34	4 min	normal	2022-06-28 09:41:52	Finish	1	1	1	1	4	1	1	3	1	1	1	2	1	1	3	1	2	3	2	3
				Mid-pregnancy	Maternal mental health assessment	Self-rating Anxiety Scale (SAS)	21	10 min	normal	2022-06-28 09:44:38	Finish	1	1	1	1	1	1	1	1	1	1	1	1	1	1	1	2	1	1	1	1
				Early pregnancy	Maternal mental health assessment	Self-rating Anxiety Scale (SAS)	25	7 min	normal	2022-06-28 10:09:29	Finish	2	1	1	1	1	1	1	2	1	1	1	1	1	1	1	2	1	1	2	2
				Early pregnancy	Maternal mental health assessment	Self-rating Anxiety Scale (SAS)	28	5 min	normal	2022-06-28 10:15:36	Finish	2	1	1	1	2	1	1	2	2	1	1	1	1	1	1	2	2	2	2	1
				Early pregnancy	Maternal mental health assessment	Self-rating Anxiety Scale (SAS)	25	2 min	normal	2022-06-28 10:28:39	Finish	1	1	1	1	2	1	1	1	1	1	1	1	1	1	1	2	2	2	2	1
				Mid-pregnancy	Maternal mental health assessment	Self-rating Anxiety Scale (SAS)	44	2 min	mild	2022-06-28 10:31:14	Finish	3	2	2	1	2	1	2	3	2	2	1	1	4	2	3	3	3	1	3	3
				Early pregnancy	Maternal mental health assessment	Self-rating Anxiety Scale (SAS)	31	2 min	normal	2022-06-28 10:35:11	Finish	2	1	1	1	2	1	1	1	2	2	1	1	2	1	1	3	3	2	2	1
				Early pregnancy	Maternal mental health assessment	Self-rating Anxiety Scale (SAS)	31	2 min	normal	2022-06-28 10:40:48	Finish	1	1	1	1	1	1	1	2	4	1	1	1	4	1	2	2	2	1	2	1
				Early pregnancy	Maternal mental health assessment	Self-rating Anxiety Scale (SAS)	37	2 min	normal	2022-06-28 10:46:37	Finish	2	1	2	1	4	1	2	2	2	1	1	2	4	1	2	3	2	2	1	1
				Early pregnancy	Maternal mental health assessment	Self-rating Anxiety Scale (SAS)	32	2 min	normal	2022-06-28 10:50:20	Finish	1	1	1	1	2	1	2	2	2	2	1	1	1	1	2	2	3	2	3	1
				Mid-pregnancy	Maternal mental health assessment	Self-rating Anxiety Scale (SAS)	28	2 min	normal	2022-06-28 10:53:35	Finish	1	1	1	1	2	1	1	1	2	1	1	1	4	1	1	2	3	1	1	1
				Early pregnancy	Maternal mental health assessment	Self-rating Anxiety Scale (SAS)	45	2 min	mild	2022-06-28 11:01:50	Finish	2	2	2	4	3	1	2	2	3	2	2	2	2	2	3	3	2	2	2	2
				Early pregnancy	Maternal mental health assessment	Self-rating Anxiety Scale (SAS)	27	2 min	normal	2022-06-28 11:08:12	Finish	1	1	1	1	4	1	1	2	2	1	1	1	1	1	2	1	2	1	1	1
				Early pregnancy	Maternal mental health assessment	Self-rating Anxiety Scale (SAS)	36	2 min	normal	2022-06-28 11:11:30	Finish	2	1	2	1	1	1	1	2	3	2	1	2	3	1	3	3	3	1	2	1
				Early pregnancy	Maternal mental health assessment	Self-rating Anxiety Scale (SAS)	30	2 min	normal	2022-06-28 11:13:49	Finish	1	1	1	1	4	1	1	2	3	2	1	1	1	1	1	3	2	1	1	1
				Early pregnancy	Maternal mental health assessment	Self-rating Anxiety Scale (SAS)	35	1 min	normal	2022-06-28 11:17:50	Finish	1	1	1	1	4	1	1	1	4	1	1	1	4	1	2	2	2	1	4	1
				Early pregnancy	Maternal mental health assessment	Self-rating Anxiety Scale (SAS)	30	2 min	normal	2022-06-28 11:35:45	Finish	1	1	1	1	1	1	1	2	2	2	2	1	1	1	1	3	2	2	3	1
				Early pregnancy	Maternal mental health assessment	Self-rating Anxiety Scale (SAS)	20	56 min	normal	2022-06-28 11:38:13	Finish	1	1	1	1	1	1	1	1	1	1	1	1	1	1	1	1	1	1	1	1
				Early pregnancy	Maternal mental health assessment	Self-rating Anxiety Scale (SAS)	38	5 min	normal	2022-06-28 11:46:49	Finish	2	1	2	2	3	2	1	2	3	2	1	1	2	1	3	2	3	1	3	1
				Early pregnancy	Maternal mental health assessment	Self-rating Anxiety Scale (SAS)	26	2 min	normal	2022-06-28 11:51:48	Finish	1	1	1	1	2	1	1	1	1	1	1	1	4	1	1	1	2	1	2	1
				Early pregnancy	Maternal mental health assessment	Self-rating Anxiety Scale (SAS)	21	2 min	normal	2022-06-28 11:59:21	Finish	1	1	1	1	1	1	1	2	1	1	1	1	1	1	1	1	1	1	1	1
				Mid-pregnancy	Maternal mental health assessment	Self-rating Anxiety Scale (SAS)	33	2 min	normal	2022-06-28 14:41:08	Finish	1	1	1	1	2	1	2	3	2	2	1	1	4	1	1	3	2	1	2	1
				Early pregnancy	Maternal mental health assessment	Self-rating Anxiety Scale (SAS)	35	2 min	normal	2022-06-28 15:05:41	Finish	1	1	1	1	3	1	1	1	2	1	1	1	4	1	1	3	4	1	4	2
				Early pregnancy	Maternal mental health assessment	Self-rating Anxiety Scale (SAS)	40	2 min	normal	2022-06-29 08:31:45	Finish	2	2	2	2	2	1	2	3	3	1	1	1	4	1	3	3	2	1	3	1
				Early pregnancy	Maternal mental health assessment	Self-rating Anxiety Scale (SAS)	25	2 min	normal	2022-06-29 09:17:38	Finish	2	1	2	1	1	1	1	1	1	1	1	1	1	1	1	2	3	1	1	1
				Early pregnancy	Maternal mental health assessment	Self-rating Anxiety Scale (SAS)	35	2 min	normal	2022-06-29 09:30:09	Finish	2	2	2	1	2	1	2	1	2	2	2	2	2	1	2	2	2	2	2	1
				Early pregnancy	Maternal mental health assessment	Self-rating Anxiety Scale (SAS)	35	1 min	normal	2022-06-29 09:35:45	Finish	1	1	1	1	4	1	1	1	4	1	1	1	4	1	1	1	4	1	4	1
				Early pregnancy	Maternal mental health assessment	Self-rating Anxiety Scale (SAS)	21	1 min	normal	2022-06-29 09:44:02	Finish	1	1	1	1	1	1	1	1	1	1	1	1	1	1	1	2	1	1	1	1
				Early pregnancy	Maternal mental health assessment	Self-rating Anxiety Scale (SAS)	28	1 min	normal	2022-06-29 09:46:05	Finish	1	2	2	1	2	1	1	2	3	1	1	1	1	1	1	3	1	1	1	1
				Early pregnancy	Maternal mental health assessment	Self-rating Anxiety Scale (SAS)	21	2 min	normal	2022-06-29 09:48:59	Finish	1	1	1	1	1	1	1	1	1	1	1	1	1	1	2	1	1	1	1	1
				Early pregnancy	Maternal mental health assessment	Self-rating Anxiety Scale (SAS)	40	3 min	normal	2022-06-29 09:53:21	Finish	2	1	1	1	4	1	1	3	3	2	2	1	2	1	4	3	2	1	4	1
				Early pregnancy	Maternal mental health assessment	Self-rating Anxiety Scale (SAS)	26	2 min	normal	2022-06-29 10:03:45	Finish	1	1	1	1	4	1	1	1	1	1	1	1	1	1	2	2	2	1	1	1
				Early pregnancy	Maternal mental health assessment	Self-rating Anxiety Scale (SAS)	41	3 min	normal	2022-06-29 10:09:17	Finish	2	2	2	3	2	1	2	2	4	1	1	1	3	1	2	2	4	1	3	2
				Early pregnancy	Maternal mental health assessment	Self-rating Anxiety Scale (SAS)	34	15 min	normal	2022-06-29 10:13:35	Finish	3	2	2	2	2	1	1	2	2	2	1	1	1	1	2	2	2	1	3	1
				Early pregnancy	Maternal mental health assessment	Self-rating Anxiety Scale (SAS)	29	2 min	normal	2022-06-29 10:13:55	Finish	1	1	1	1	2	1	1	1	2	1	1	1	2	1	2	2	4	1	2	1
				Early pregnancy	Maternal mental health assessment	Self-rating Anxiety Scale (SAS)	27	2 min	normal	2022-06-29 10:23:20	Finish	1	1	1	1	1	1	1	2	2	1	2	1	2	1	2	3	1	1	1	1
				Late pregnancy	Maternal mental health assessment	Self-rating Anxiety Scale (SAS)	36	5 min	normal	2022-06-29 10:25:43	Finish	2	1	1	1	2	1	1	2	2	3	1	2	2	1	2	3	3	1	3	2
				Late pregnancy	Maternal mental health assessment	Self-rating Anxiety Scale (SAS)	28	1 min	normal	2022-06-29 10:32:33	Finish	1	1	2	1	1	1	1	2	1	2	2	1	2	4	1	1	1	1	1	1
				Mid-pregnancy	Maternal mental health assessment	Self-rating Anxiety Scale (SAS)	35	8 min	normal	2022-06-29 10:34:37	Finish	1	1	1	1	4	1	1	1	4	1	1	1	4	1	1	2	3	1	4	1
				Early pregnancy	Maternal mental health assessment	Self-rating Anxiety Scale (SAS)	42	5 min	normal	2022-06-29 10:36:09	Finish	2	2	2	2	4	1	2	3	1	3	1	1	1	1	1	2	2	4	3	4
				Early pregnancy	Maternal mental health assessment	Self-rating Anxiety Scale (SAS)	35	2 min	normal	2022-06-29 10:40:00	Finish	1	1	1	1	4	1	1	3	2	1	2	2	2	1	3	3	2	1	2	1
				Early pregnancy	Maternal mental health assessment	Self-rating Anxiety Scale (SAS)	29	2 min	normal	2022-06-29 10:40:28	Finish	1	1	1	1	4	1	1	1	2	1	1	2	1	1	2	2	3	1	1	1
				Early pregnancy	Maternal mental health assessment	Self-rating Anxiety Scale (SAS)	34	2 min	normal	2022-06-29 11:19:30	Finish	1	1	1	1	2	2	1	3	2	1	2	1	2	1	2	3	2	2	3	1
				Early pregnancy	Maternal mental health assessment	Self-rating Anxiety Scale (SAS)	38	3 min	normal	2022-06-29 11:20:27	Finish	2	1	2	1	3	2	2	3	2	2	3	2	2	1	2	3	1	1	2	1
				Early pregnancy	Maternal mental health assessment	Self-rating Anxiety Scale (SAS)	24	2 min	normal	2022-06-29 11:29:16	Finish	1	1	1	1	2	1	1	1	1	1	1	1	1	1	1	2	1	1	2	2
				Early pregnancy	Maternal mental health assessment	Self-rating Anxiety Scale (SAS)	25	42 min	normal	2022-06-29 11:29:46	Finish	1	1	1	1	1	1	1	1	2	1	1	1	2	1	1	2	2	1	2	1
				Early pregnancy	Maternal mental health assessment	Self-rating Anxiety Scale (SAS)	21	2 min	normal	2022-06-29 11:53:22	Finish	1	1	1	1	1	1	1	2	1	1	1	1	1	1	1	1	1	1	1	1
				Early pregnancy	Maternal mental health assessment	Self-rating Anxiety Scale (SAS)	35	1 min	normal	2022-06-29 12:34:55	Finish	2	1	1	1	4	2	1	1	2	2	1	1	4	1	1	1	4	1	2	2
				Mid-pregnancy	Maternal mental health assessment	Self-rating Anxiety Scale (SAS)	25	2 min	normal	2022-06-29 13:40:51	Finish	2	1	1	1	1	1	2	1	1	1	1	2	1	1	1	2	2	1	1	1
				Early pregnancy	Maternal mental health assessment	Self-rating Anxiety Scale (SAS)	35	2 min	normal	2022-06-29 14:25:27	Finish	1	1	1	1	4	1	1	1	4	1	1	1	4	1	1	2	4	2	2	1
				Mid-pregnancy	Maternal mental health assessment	Self-rating Anxiety Scale (SAS)	36	2 min	normal	2022-06-29 14:44:36	Finish	1	1	1	1	4	1	1	1	4	2	1	1	4	1	1	1	4	1	4	1
				Early pregnancy	Maternal mental health assessment	Self-rating Anxiety Scale (SAS)	30	2 min	normal	2022-06-29 14:57:59	Finish	2	1	1	1	1	1	2	2	1	2	2	1	2	1	1	3	2	1	2	1
				Mid-pregnancy	Maternal mental health assessment	Self-rating Anxiety Scale (SAS)	34	2 min	normal	2022-06-29 15:20:19	Finish	1	1	1	1	4	1	2	1	3	1	1	1	4	1	1	2	4	1	2	1
				Mid-pregnancy	Maternal mental health assessment	Self-rating Anxiety Scale (SAS)	29	18 min	normal	2022-06-29 15:22:48	Finish	2	2	1	1	1	1	1	2	1	2	1	1	1	1	1	2	4	1	2	1
				Early pregnancy	Maternal mental health assessment	Self-rating Anxiety Scale (SAS)	34	2 min	normal	2022-06-29 15:30:10	Finish	2	2	2	1	2	1	2	2	3	1	2	1	2	1	1	1	4	1	2	1
				Mid-pregnancy	Maternal mental health assessment	Self-rating Anxiety Scale (SAS)	45	2 min	mild	2022-06-29 15:57:26	Finish	2	2	2	1	3	2	2	3	2	2	2	2	3	1	2	3	2	3	3	3
				Early pregnancy	Maternal mental health assessment	Self-rating Anxiety Scale (SAS)	48	1827 min	mild	2022-06-29 17:11:46	Finish	3	3	3	2	4	2	1	2	3	2	3	3	3	1	2	3	2	2	2	2
				Early pregnancy	Maternal mental health assessment	Self-rating Anxiety Scale (SAS)	32	2 min	normal	2022-06-30 08:03:38	Finish	1	1	2	1	2	1	1	1	2	2	2	1	3	1	1	1	4	1	3	1
				Early pregnancy	Maternal mental health assessment	Self-rating Anxiety Scale (SAS)	43	1 min	mild	2022-06-30 08:13:25	Finish	2	2	2	2	3	1	2	2	3	2	2	2	2	2	2	3	3	2	2	2
				Early pregnancy	Maternal mental health assessment	Self-rating Anxiety Scale (SAS)	29	2 min	normal	2022-06-30 08:36:07	Finish	1	1	1	1	4	1	1	2	1	1	1	1	1	1	1	2	1	2	3	2
				Early pregnancy	Maternal mental health assessment	Self-rating Anxiety Scale (SAS)	20	2 min	normal	2022-06-30 08:37:42	Finish	1	1	1	1	1	1	1	1	1	1	1	1	1	1	1	1	1	1	1	1
				Early pregnancy	Maternal mental health assessment	Self-rating Anxiety Scale (SAS)	35	2 min	normal	2022-06-30 08:47:42	Finish	2	1	1	1	4	1	2	1	4	1	2	1	3	1	1	2	4	1	1	1
				Early pregnancy	Maternal mental health assessment	Self-rating Anxiety Scale (SAS)	31	1 min	normal	2022-06-30 09:12:35	Finish	1	1	1	1	4	1	1	1	1	2	1	1	4	1	1	2	3	2	1	1
				Early pregnancy	Maternal mental health assessment	Self-rating Anxiety Scale (SAS)	33	3 min	normal	2022-06-30 09:13:18	Finish	1	1	1	1	4	1	1	1	4	1	1	1	1	1	2	4	4	1	1	1
				Mid-pregnancy	Maternal mental health assessment	Self-rating Anxiety Scale (SAS)	35	4 min	normal	2022-06-30 09:16:36	Finish	2	2	1	1	2	1	2	2	1	2	2	1	1	2	2	3	2	2	3	1
				Early pregnancy	Maternal mental health assessment	Self-rating Anxiety Scale (SAS)	22	1 min	normal	2022-06-30 09:20:23	Finish	1	1	1	1	1	1	1	1	2	1	1	1	1	1	1	1	2	1	1	1
				Early pregnancy	Maternal mental health assessment	Self-rating Anxiety Scale (SAS)	25	2 min	normal	2022-06-30 09:47:29	Finish	1	1	1	1	1	1	1	2	1	1	1	2	1	1	1	3	2	1	1	1
				Early pregnancy	Maternal mental health assessment	Self-rating Anxiety Scale (SAS)	29	2 min	normal	2022-06-30 10:12:33	Finish	2	1	2	1	1	1	1	1	2	2	1	1	1	1	1	3	2	1	3	1
				Early pregnancy	Maternal mental health assessment	Self-rating Anxiety Scale (SAS)	31	2 min	normal	2022-06-30 10:29:32	Finish	1	1	1	1	2	1	1	2	2	1	1	1	4	1	1	2	2	1	4	1
				Early pregnancy	Maternal mental health assessment	Self-rating Anxiety Scale (SAS)	24	2 min	normal	2022-06-30 10:41:49	Finish	1	1	1	1	1	1	1	2	2	2	1	1	1	1	1	1	1	1	2	1
				Early pregnancy	Maternal mental health assessment	Self-rating Anxiety Scale (SAS)	27	2 min	normal	2022-06-30 10:52:09	Finish	1	1	1	1	2	1	1	1	3	1	1	1	1	1	1	3	2	1	2	1
				Early pregnancy	Maternal mental health assessment	Self-rating Anxiety Scale (SAS)	35	1 min	normal	2022-06-30 10:53:08	Finish	1	1	1	1	4	1	1	1	4	1	1	1	4	1	1	1	4	1	4	1
				Early pregnancy	Maternal mental health assessment	Self-rating Anxiety Scale (SAS)	30	2 min	normal	2022-06-30 10:55:07	Finish	1	1	1	1	4	1	1	1	1	1	1	1	4	1	1	2	3	1	1	2
				Early pregnancy	Maternal mental health assessment	Self-rating Anxiety Scale (SAS)	24	2 min	normal	2022-06-30 11:02:27	Finish	1	1	1	1	1	1	1	1	2	1	1	1	1	1	1	3	2	1	1	1
				Early pregnancy	Maternal mental health assessment	Self-rating Anxiety Scale (SAS)	35	2 min	normal	2022-06-30 11:21:59	Finish	1	1	1	1	4	1	2	2	2	2	2	1	1	1	2	2	4	1	2	2
				Early pregnancy	Maternal mental health assessment	Self-rating Anxiety Scale (SAS)	32	2 min	normal	2022-06-30 11:38:36	Finish	1	1	1	1	4	1	1	1	3	1	1	2	4	1	1	2	3	1	1	1
				Early pregnancy	Maternal mental health assessment	Self-rating Anxiety Scale (SAS)	27	1 min	normal	2022-06-30 11:38:46	Finish	1	1	2	1	3	1	1	1	2	1	1	1	2	1	1	1	2	1	2	1
				Early pregnancy	Maternal mental health assessment	Self-rating Anxiety Scale (SAS)	20	1 min	normal	2022-06-30 11:40:58	Finish	1	1	1	1	1	1	1	1	1	1	1	1	1	1	1	1	1	1	1	1
				Early pregnancy	Maternal mental health assessment	Self-rating Anxiety Scale (SAS)	28	2 min	normal	2022-06-30 15:41:01	Finish	1	1	2	1	4	1	1	1	2	1	1	1	1	1	1	3	2	1	1	1
				Early pregnancy	Maternal mental health assessment	Self-rating Anxiety Scale (SAS)	35	1 min	normal	2022-06-30 15:41:45	Finish	1	1	1	1	4	1	1	1	4	1	1	1	4	1	1	1	4	1	4	1
				Mid-pregnancy	Maternal mental health assessment	Self-rating Anxiety Scale (SAS)	27	2 min	normal	2022-07-01 07:53:16	Finish	1	1	1	1	2	1	1	1	2	1	1	1	2	1	1	2	1	2	2	2
				Early pregnancy	Maternal mental health assessment	Self-rating Anxiety Scale (SAS)	25	2 min	normal	2022-07-01 08:10:57	Finish	1	1	1	1	1	1	1	1	2	2	1	1	1	1	1	1	2	2	2	1
				Early pregnancy	Maternal mental health assessment	Self-rating Anxiety Scale (SAS)	28	1 min	normal	2022-07-01 08:53:35	Finish	1	1	1	1	1	1	1	1	2	1	1	1	4	1	1	3	3	1	1	1
				Early pregnancy	Maternal mental health assessment	Self-rating Anxiety Scale (SAS)	30	2 min	normal	2022-07-01 09:03:00	Finish	2	2	2	1	1	1	1	1	1	1	1	1	4	1	1	1	4	1	2	1
				Early pregnancy	Maternal mental health assessment	Self-rating Anxiety Scale (SAS)	45	2 min	mild	2022-07-01 09:06:57	Finish	3	2	2	2	3	1	1	3	3	3	2	2	3	1	2	2	3	2	3	2
				Early pregnancy	Maternal mental health assessment	Self-rating Anxiety Scale (SAS)	30	2 min	normal	2022-07-01 09:07:00	Finish	2	1	1	2	3	1	1	2	1	2	1	1	1	1	2	2	1	2	1	2
				Early pregnancy	Maternal mental health assessment	Self-rating Anxiety Scale (SAS)	39	1 min	normal	2022-07-01 09:08:10	Finish	2	2	2	2	3	1	2	3	2	2	1	1	2	1	2	3	2	2	2	2
				Early pregnancy	Maternal mental health assessment	Self-rating Anxiety Scale (SAS)	29	2 min	normal	2022-07-01 09:11:15	Finish	2	1	1	1	2	1	1	2	2	1	2	1	1	1	1	2	2	2	2	1
				Early pregnancy	Maternal mental health assessment	Self-rating Anxiety Scale (SAS)	30	3 min	normal	2022-07-01 09:17:45	Finish	1	1	2	1	2	1	1	2	2	2	1	1	1	1	3	2	1	1	2	2
				Early pregnancy	Maternal mental health assessment	Self-rating Anxiety Scale (SAS)	24	2 min	normal	2022-07-01 09:19:37	Finish	1	1	1	1	4	1	1	1	1	1	1	1	1	1	1	2	1	1	1	1
				Early pregnancy	Maternal mental health assessment	Self-rating Anxiety Scale (SAS)	24	2 min	normal	2022-07-01 09:24:45	Finish	1	1	1	1	4	1	1	1	1	1	1	1	1	1	1	2	1	1	1	1
				Early pregnancy	Maternal mental health assessment	Self-rating Anxiety Scale (SAS)	32	2 min	normal	2022-07-01 09:27:48	Finish	2	1	2	1	2	1	1	1	2	1	1	1	2	1	2	3	2	2	2	2
				Early pregnancy	Maternal mental health assessment	Self-rating Anxiety Scale (SAS)	39	2 min	normal	2022-07-01 09:45:28	Finish	2	2	1	1	3	1	1	2	4	1	1	1	4	1	3	3	2	1	3	2
				Early pregnancy	Maternal mental health assessment	Self-rating Anxiety Scale (SAS)	33	2 min	normal	2022-07-01 09:47:00	Finish	2	1	1	1	2	1	1	2	2	2	2	2	2	2	1	2	2	1	2	2
				Early pregnancy	Maternal mental health assessment	Self-rating Anxiety Scale (SAS)	25	2 min	normal	2022-07-01 09:50:42	Finish	1	1	1	1	2	1	1	1	1	1	1	1	4	1	1	1	1	1	2	1
				Early pregnancy	Maternal mental health assessment	Self-rating Anxiety Scale (SAS)	28	1 min	normal	2022-07-01 09:53:53	Finish	2	1	1	1	4	1	1	1	2	1	1	1	2	1	1	2	1	1	2	1
				Early pregnancy	Maternal mental health assessment	Self-rating Anxiety Scale (SAS)	33	1 min	normal	2022-07-01 10:00:48	Finish	1	1	1	1	4	1	1	1	4	1	1	1	4	1	1	2	4	1	1	1
				Early pregnancy	Maternal mental health assessment	Self-rating Anxiety Scale (SAS)	31	2 min	normal	2022-07-01 10:04:17	Finish	2	1	1	1	3	1	1	2	3	1	1	1	2	1	1	3	2	1	2	1
				Early pregnancy	Maternal mental health assessment	Self-rating Anxiety Scale (SAS)	27	2 min	normal	2022-07-01 10:16:04	Finish	1	1	1	1	2	1	1	1	2	1	1	1	2	1	1	2	2	1	2	2
				Early pregnancy	Maternal mental health assessment	Self-rating Anxiety Scale (SAS)	29	3 min	normal	2022-07-01 10:19:11	Finish	2	1	1	1	2	1	1	1	1	1	2	1	1	2	2	3	3	1	1	1
				Early pregnancy	Maternal mental health assessment	Self-rating Anxiety Scale (SAS)	28	2 min	normal	2022-07-01 10:22:20	Finish	1	1	1	1	4	1	1	1	4	1	1	1	1	1	1	2	1	1	1	2
				Early pregnancy	Maternal mental health assessment	Self-rating Anxiety Scale (SAS)	31	2 min	normal	2022-07-01 10:24:04	Finish	1	1	2	1	2	1	2	3	2	1	1	1	2	1	3	2	1	1	2	1
				Early pregnancy	Maternal mental health assessment	Self-rating Anxiety Scale (SAS)	33	2 min	normal	2022-07-01 10:26:15	Finish	2	2	2	1	3	1	1	1	2	1	1	1	2	1	2	2	3	1	2	2
				Early pregnancy	Maternal mental health assessment	Self-rating Anxiety Scale (SAS)	42	2 min	normal	2022-07-01 10:49:44	Finish	1	1	1	2	4	1	2	2	3	1	2	2	3	1	3	2	4	2	3	2
				Early pregnancy	Maternal mental health assessment	Self-rating Anxiety Scale (SAS)	29	1 min	normal	2022-07-01 10:56:52	Finish	2	1	1	1	1	1	1	1	1	1	1	1	4	1	1	2	4	1	2	1
				Early pregnancy	Maternal mental health assessment	Self-rating Anxiety Scale (SAS)	27	1 min	normal	2022-07-01 11:00:31	Finish	1	1	1	1	2	1	1	1	1	1	1	1	4	1	1	2	2	1	2	1
				Early pregnancy	Maternal mental health assessment	Self-rating Anxiety Scale (SAS)	28	2 min	normal	2022-07-01 11:11:35	Finish	1	1	1	1	1	1	1	1	1	2	1	1	1	1	1	3	4	1	3	1
				Early pregnancy	Maternal mental health assessment	Self-rating Anxiety Scale (SAS)	24	2 min	normal	2022-07-01 11:20:05	Finish	2	1	1	1	1	1	1	1	1	1	1	1	1	1	1	2	2	2	1	1
				Early pregnancy	Maternal mental health assessment	Self-rating Anxiety Scale (SAS)	38	1 min	normal	2022-07-01 11:26:10	Finish	2	2	2	1	3	1	1	2	3	1	1	1	4	1	2	3	2	1	4	1
				Early pregnancy	Maternal mental health assessment	Self-rating Anxiety Scale (SAS)	32	2 min	normal	2022-07-01 11:28:13	Finish	2	1	2	1	2	1	1	2	2	2	1	1	2	1	2	2	2	1	2	2
				Early pregnancy	Maternal mental health assessment	Self-rating Anxiety Scale (SAS)	25	2 min	normal	2022-07-01 11:31:25	Finish	1	1	1	1	1	1	1	2	4	1	1	1	1	1	2	1	1	1	1	1
				Early pregnancy	Maternal mental health assessment	Self-rating Anxiety Scale (SAS)	35	1 min	normal	2022-07-01 11:39:14	Finish	1	1	1	1	4	1	1	1	4	1	1	1	4	1	1	1	4	1	4	1
				Early pregnancy	Maternal mental health assessment	Self-rating Anxiety Scale (SAS)	33	1 min	normal	2022-07-01 13:38:38	Finish	1	1	1	1	4	1	1	2	4	1	1	1	4	1	2	1	2	1	1	2
				Mid-pregnancy	Maternal mental health assessment	Self-rating Anxiety Scale (SAS)	34	4 min	normal	2022-07-01 13:43:21	Finish	2	1	1	1	1	1	2	1	1	2	1	2	2	1	2	3	2	3	2	3
				Early pregnancy	Maternal mental health assessment	Self-rating Anxiety Scale (SAS)	30	4 min	normal	2022-07-01 13:53:51	Finish	2	2	2	1	1	1	1	1	1	1	1	1	4	1	2	1	4	1	1	1
				Early pregnancy	Maternal mental health assessment	Self-rating Anxiety Scale (SAS)	28	2 min	normal	2022-07-01 13:55:03	Finish	1	2	2	1	1	1	1	2	1	2	2	2	1	1	1	2	2	1	1	1
				Early pregnancy	Maternal mental health assessment	Self-rating Anxiety Scale (SAS)	31	2 min	normal	2022-07-01 14:11:35	Finish	2	1	1	1	4	1	1	1	2	2	1	1	2	1	1	3	2	1	2	1
				Early pregnancy	Maternal mental health assessment	Self-rating Anxiety Scale (SAS)	42	1 min	normal	2022-07-01 14:11:51	Finish	1	2	2	2	4	2	2	2	2	2	2	2	2	3	2	2	2	3	2	1
				Early pregnancy	Maternal mental health assessment	Self-rating Anxiety Scale (SAS)	28	2 min	normal	2022-07-01 14:23:10	Finish	1	1	1	1	2	1	2	2	2	3	1	1	1	1	1	1	2	1	2	1
				Early pregnancy	Maternal mental health assessment	Self-rating Anxiety Scale (SAS)	27	2 min	normal	2022-07-01 14:32:55	Finish	1	1	1	1	2	1	1	1	3	1	1	1	1	1	1	2	4	1	1	1
				Early pregnancy	Maternal mental health assessment	Self-rating Anxiety Scale (SAS)	26	2 min	normal	2022-07-01 14:42:08	Finish	1	1	1	1	2	1	1	1	1	1	1	1	1	1	1	3	2	2	1	2
				Early pregnancy	Maternal mental health assessment	Self-rating Anxiety Scale (SAS)	23	3 min	normal	2022-07-01 15:00:29	Finish	1	1	1	1	1	1	1	1	1	1	1	1	1	1	1	3	1	1	2	1
				Early pregnancy	Maternal mental health assessment	Self-rating Anxiety Scale (SAS)	20	2 min	normal	2022-07-01 15:03:42	Finish	1	1	1	1	1	1	1	1	1	1	1	1	1	1	1	1	1	1	1	1
				Early pregnancy	Maternal mental health assessment	Self-rating Anxiety Scale (SAS)	33	3 min	normal	2022-07-01 15:53:52	Finish	2	1	2	2	1	1	1	1	1	1	1	2	4	1	3	2	4	1	1	1
				Early pregnancy	Maternal mental health assessment	Self-rating Anxiety Scale (SAS)	34	1 min	normal	2022-07-02 11:04:55	Finish	1	1	1	1	1	1	2	3	3	1	1	1	4	1	2	2	2	1	4	1
				Early pregnancy	Maternal mental health assessment	Self-rating Anxiety Scale (SAS)	26	2 min	normal	2022-07-02 11:05:11	Finish	1	1	1	1	1	1	2	1	1	1	1	1	1	1	1	2	2	1	3	2
				Early pregnancy	Maternal mental health assessment	Self-rating Anxiety Scale (SAS)	44	2 min	mild	2022-07-02 11:11:08	Finish	2	1	2	1	4	2	2	3	2	3	3	3	1	1	2	3	2	2	3	2
				Early pregnancy	Maternal mental health assessment	Self-rating Anxiety Scale (SAS)	32	2 min	normal	2022-07-02 11:12:46	Finish	1	1	1	1	2	1	1	1	4	1	1	1	4	1	2	2	2	2	2	1
				Mid-pregnancy	Maternal mental health assessment	Self-rating Anxiety Scale (SAS)	33	2 min	normal	2022-07-02 11:36:55	Finish	1	1	1	1	4	1	1	1	4	1	1	1	4	1	1	2	4	1	1	1
				Early pregnancy	Maternal mental health assessment	Self-rating Anxiety Scale (SAS)	24	2 min	normal	2022-07-02 12:07:05	Finish	1	1	1	1	1	1	1	1	2	1	1	1	4	1	1	1	1	1	1	1
				Early pregnancy	Maternal mental health assessment	Self-rating Anxiety Scale (SAS)	35	1 min	normal	2022-07-02 14:23:58	Finish	1	1	1	1	4	1	1	1	4	1	1	1	4	1	1	1	4	1	4	1
				Mid-pregnancy	Maternal mental health assessment	Self-rating Anxiety Scale (SAS)	36	3 min	normal	2022-07-02 15:02:55	Finish	2	2	2	1	3	1	1	3	3	1	2	1	1	1	1	3	2	2	2	2
				Early pregnancy	Maternal mental health assessment	Self-rating Anxiety Scale (SAS)	29	2 min	normal	2022-07-02 15:50:02	Finish	2	1	2	2	2	1	1	2	2	1	2	1	1	1	1	2	1	1	2	1
				Early pregnancy	Maternal mental health assessment	Self-rating Anxiety Scale (SAS)	35	2 min	normal	2022-07-02 16:02:55	Finish	2	2	1	1	2	3	1	2	2	2	1	1	1	1	2	2	4	1	1	3
				Early pregnancy	Maternal mental health assessment	Self-rating Anxiety Scale (SAS)	33	2 min	normal	2022-07-02 16:34:28	Finish	1	1	1	1	3	1	1	2	3	1	1	1	2	1	1	3	4	1	2	2
				Early pregnancy	Maternal mental health assessment	Self-rating Anxiety Scale (SAS)	51	1 min	中度	2022-07-03 04:00:17	Finish	2	2	2	2	3	1	3	4	3	2	3	3	4	1	4	3	3	1	4	1
				Mid-pregnancy	Maternal mental health assessment	Self-rating Anxiety Scale (SAS)	34	2 min	normal	2022-07-04 06:53:50	Finish	2	1	1	1	4	1	1	1	2	2	1	1	4	1	1	2	4	1	1	2
				Early pregnancy	Maternal mental health assessment	Self-rating Anxiety Scale (SAS)	26	3 min	normal	2022-07-04 08:09:33	Finish	2	2	2	1	1	1	1	1	1	1	1	1	1	1	1	4	1	1	1	1
				Early pregnancy	Maternal mental health assessment	Self-rating Anxiety Scale (SAS)	30	1 min	normal	2022-07-04 08:30:15	Finish	1	1	1	1	4	1	1	1	1	1	1	1	4	1	1	2	4	1	1	1
				Early pregnancy	Maternal mental health assessment	Self-rating Anxiety Scale (SAS)	41	1 min	normal	2022-07-04 08:49:27	Finish	2	1	2	1	4	1	2	1	2	3	2	1	3	1	3	3	2	2	2	3
				Early pregnancy	Maternal mental health assessment	Self-rating Anxiety Scale (SAS)	31	2 min	normal	2022-07-04 08:55:52	Finish	3	1	1	1	1	2	1	2	2	2	1	2	1	1	1	3	1	2	1	2
				Early pregnancy	Maternal mental health assessment	Self-rating Anxiety Scale (SAS)	38	3 min	normal	2022-07-04 08:59:50	Finish	2	1	2	1	4	1	1	1	4	2	1	1	4	1	1	2	4	1	2	2
				Early pregnancy	Maternal mental health assessment	Self-rating Anxiety Scale (SAS)	33	2 min	normal	2022-07-04 09:08:19	Finish	2	1	1	1	1	1	2	3	2	1	2	1	1	1	1	3	3	1	3	2
				Mid-pregnancy	Maternal mental health assessment	Self-rating Anxiety Scale (SAS)	28	3 min	normal	2022-07-04 09:21:01	Finish	1	1	1	1	2	1	2	2	2	1	1	1	1	1	1	3	2	1	2	1
				Early pregnancy	Maternal mental health assessment	Self-rating Anxiety Scale (SAS)	27	3 min	normal	2022-07-04 09:34:33	Finish	1	1	1	1	1	1	1	2	1	1	1	2	1	1	2	3	1	1	2	2
				Late pregnancy	Maternal mental health assessment	Self-rating Anxiety Scale (SAS)	28	1 min	normal	2022-07-04 09:37:27	Finish	1	1	1	1	1	1	1	1	1	1	1	1	4	1	1	3	4	1	1	1
				Early pregnancy	Maternal mental health assessment	Self-rating Anxiety Scale (SAS)	31	2 min	normal	2022-07-04 09:50:10	Finish	1	1	1	1	1	1	1	3	2	1	1	1	1	1	2	3	4	1	2	2
				Early pregnancy	Maternal mental health assessment	Self-rating Anxiety Scale (SAS)	29	1 min	normal	2022-07-04 10:04:00	Finish	1	1	1	1	2	1	3	1	1	1	1	1	4	1	1	2	2	1	2	1
				Early pregnancy	Maternal mental health assessment	Self-rating Anxiety Scale (SAS)	28	2 min	normal	2022-07-04 10:09:23	Finish	1	1	1	1	1	1	1	2	2	2	2	1	1	1	1	3	1	1	3	1
				Early pregnancy	Maternal mental health assessment	Self-rating Anxiety Scale (SAS)	33	3 min	normal	2022-07-04 10:16:13	Finish	2	2	2	2	2	1	1	1	2	1	1	1	4	1	1	3	2	1	2	1
				Early pregnancy	Maternal mental health assessment	Self-rating Anxiety Scale (SAS)	33	2 min	normal	2022-07-04 10:20:44	Finish	1	1	1	1	2	1	1	1	3	1	1	1	3	1	1	3	4	1	4	1
				Late pregnancy	Maternal mental health assessment	Self-rating Anxiety Scale (SAS)	42	6 min	normal	2022-07-04 10:34:29	Finish	2	2	2	2	3	1	2	3	2	2	2	2	3	1	1	3	2	2	3	2
				Mid-pregnancy	Maternal mental health assessment	Self-rating Anxiety Scale (SAS)	31	4 min	normal	2022-07-04 10:35:54	Finish	1	1	1	1	4	1	2	2	2	2	1	1	1	1	2	2	1	1	2	2
				Early pregnancy	Maternal mental health assessment	Self-rating Anxiety Scale (SAS)	25	1 min	normal	2022-07-04 10:39:35	Finish	1	1	1	1	4	1	1	1	1	1	2	1	1	1	1	1	1	1	2	1
				Late pregnancy	Maternal mental health assessment	Self-rating Anxiety Scale (SAS)	35	3 min	normal	2022-07-04 10:40:45	Finish	2	1	2	1	2	1	1	3	4	2	1	1	2	1	1	3	2	2	2	1
				Mid-pregnancy	Maternal mental health assessment	Self-rating Anxiety Scale (SAS)	28	2 min	normal	2022-07-04 10:59:17	Finish	1	1	1	1	4	1	1	2	1	1	1	1	1	1	1	3	1	1	2	2
				Early pregnancy	Maternal mental health assessment	Self-rating Anxiety Scale (SAS)	23	2 min	normal	2022-07-04 11:06:51	Finish	1	1	1	1	1	1	1	1	1	1	1	1	2	1	1	2	1	1	2	1
				Early pregnancy	Maternal mental health assessment	Self-rating Anxiety Scale (SAS)	29	2 min	normal	2022-07-04 11:08:19	Finish	1	1	1	1	4	1	1	1	2	1	1	1	1	1	1	3	2	1	3	1
				Mid-pregnancy	Maternal mental health assessment	Self-rating Anxiety Scale (SAS)	27	2 min	normal	2022-07-04 11:25:30	Finish	2	1	1	1	4	1	1	1	1	1	1	1	1	1	1	2	1	1	2	2
				Mid-pregnancy	Maternal mental health assessment	Self-rating Anxiety Scale (SAS)	23	2 min	normal	2022-07-04 11:28:57	Finish	1	1	1	1	1	1	2	1	1	1	1	1	1	1	1	1	1	1	3	1
				Late pregnancy	Maternal mental health assessment	Self-rating Anxiety Scale (SAS)	36	2 min	normal	2022-07-04 14:01:39	Finish	1	1	1	1	4	1	1	1	3	1	1	1	3	2	2	3	3	2	2	2
				Mid-pregnancy	Maternal mental health assessment	Self-rating Anxiety Scale (SAS)	43	4 min	mild	2022-07-04 14:23:34	Finish	3	2	2	2	3	1	2	3	3	2	2	1	2	1	2	3	2	2	3	2
				Early pregnancy	Maternal mental health assessment	Self-rating Anxiety Scale (SAS)	33	2 min	normal	2022-07-04 14:25:27	Finish	1	1	1	1	4	1	1	1	2	2	1	1	3	1	1	2	4	1	3	1
				Early pregnancy	Maternal mental health assessment	Self-rating Anxiety Scale (SAS)	31	2 min	normal	2022-07-04 14:27:40	Finish	2	1	1	2	1	1	1	1	1	1	1	1	4	1	1	2	3	2	2	2
				Early pregnancy	Maternal mental health assessment	Self-rating Anxiety Scale (SAS)	23	2 min	normal	2022-07-04 15:15:11	Finish	1	1	1	1	1	1	1	1	1	2	1	1	1	1	1	2	1	1	1	2
				Mid-pregnancy	Maternal mental health assessment	Self-rating Anxiety Scale (SAS)	32	5 min	normal	2022-07-04 15:21:05	Finish	2	2	2	2	2	1	1	2	2	2	1	1	1	1	1	4	1	1	2	1
				Mid-pregnancy	Maternal mental health assessment	Self-rating Anxiety Scale (SAS)	44	1 min	mild	2022-07-05 07:58:08	Finish	1	2	2	2	3	2	2	2	3	2	2	1	3	2	2	3	2	3	3	2
				Early pregnancy	Maternal mental health assessment	Self-rating Anxiety Scale (SAS)	32	3 min	normal	2022-07-05 08:41:25	Finish	1	1	1	1	1	1	2	2	1	3	1	1	1	1	2	3	2	2	3	2
				Early pregnancy	Maternal mental health assessment	Self-rating Anxiety Scale (SAS)	24	2 min	normal	2022-07-05 08:55:50	Finish	1	1	1	1	1	1	1	1	1	1	1	1	1	1	1	2	3	2	1	1
				Early pregnancy	Maternal mental health assessment	Self-rating Anxiety Scale (SAS)	26	1 min	normal	2022-07-05 08:56:04	Finish	1	1	1	1	2	1	1	1	2	1	1	1	1	1	2	2	2	2	1	1
				Early pregnancy	Maternal mental health assessment	Self-rating Anxiety Scale (SAS)	24	2 min	normal	2022-07-05 08:57:11	Finish	1	1	1	1	1	1	1	2	2	1	1	1	1	1	2	1	1	1	2	1
				Early pregnancy	Maternal mental health assessment	Self-rating Anxiety Scale (SAS)	27	2 min	normal	2022-07-05 09:13:57	Finish	1	1	1	1	1	1	1	2	1	1	1	1	1	1	4	3	2	1	1	1
				Early pregnancy	Maternal mental health assessment	Self-rating Anxiety Scale (SAS)	21	4 min	normal	2022-07-05 09:20:00	Finish	1	1	1	1	1	1	1	1	1	1	1	1	1	1	1	2	1	1	1	1
				Early pregnancy	Maternal mental health assessment	Self-rating Anxiety Scale (SAS)	25	2 min	normal	2022-07-05 09:22:32	Finish	1	1	1	1	1	1	1	2	1	1	2	1	1	1	1	3	1	2	1	1
				Early pregnancy	Maternal mental health assessment	Self-rating Anxiety Scale (SAS)	23	1 min	normal	2022-07-05 09:36:18	Finish	1	1	1	1	2	1	1	1	1	1	1	1	1	1	1	2	2	1	1	1
				Early pregnancy	Maternal mental health assessment	Self-rating Anxiety Scale (SAS)	23	2 min	normal	2022-07-05 09:36:34	Finish	1	1	1	1	1	1	1	1	1	1	1	1	1	1	1	2	2	2	1	1
				Mid-pregnancy	Maternal mental health assessment	Self-rating Anxiety Scale (SAS)	34	3 min	normal	2022-07-05 09:36:47	Finish	1	1	1	1	2	1	1	1	4	1	1	1	4	1	1	3	4	1	3	1
				Early pregnancy	Maternal mental health assessment	Self-rating Anxiety Scale (SAS)	35	2 min	normal	2022-07-05 09:45:30	Finish	1	1	1	1	2	1	2	3	2	2	2	1	2	1	3	3	2	2	2	1
				Early pregnancy	Maternal mental health assessment	Self-rating Anxiety Scale (SAS)	28	3 min	normal	2022-07-05 09:46:35	Finish	1	2	2	1	2	1	1	2	1	1	1	1	1	1	2	2	1	1	2	2
				Early pregnancy	Maternal mental health assessment	Self-rating Anxiety Scale (SAS)	24	2 min	normal	2022-07-05 09:55:14	Finish	1	1	1	1	1	1	2	1	1	2	1	1	1	1	1	3	1	1	1	1
				Early pregnancy	Maternal mental health assessment	Self-rating Anxiety Scale (SAS)	20	2 min	normal	2022-07-05 10:03:17	Finish	1	1	1	1	1	1	1	1	1	1	1	1	1	1	1	1	1	1	1	1
				Early pregnancy	Maternal mental health assessment	Self-rating Anxiety Scale (SAS)	27	2 min	normal	2022-07-05 10:03:49	Finish	1	1	1	1	1	1	1	2	2	1	1	1	1	1	1	3	1	2	2	2
				Mid-pregnancy	Maternal mental health assessment	Self-rating Anxiety Scale (SAS)	35	2 min	normal	2022-07-05 10:09:51	Finish	1	1	1	1	4	1	1	1	4	1	1	1	4	1	1	1	4	1	4	1
				Mid-pregnancy	Maternal mental health assessment	Self-rating Anxiety Scale (SAS)	36	2 min	normal	2022-07-05 10:19:04	Finish	1	2	2	1	2	2	1	2	3	2	1	1	2	2	2	2	2	2	2	2
				Early pregnancy	Maternal mental health assessment	Self-rating Anxiety Scale (SAS)	32	1 min	normal	2022-07-05 10:25:06	Finish	1	1	1	1	4	1	1	1	4	1	1	1	4	1	1	1	4	1	1	1
				Early pregnancy	Maternal mental health assessment	Self-rating Anxiety Scale (SAS)	34	2 min	normal	2022-07-05 11:04:58	Finish	1	1	1	1	4	1	1	1	4	1	1	1	4	1	1	2	4	1	2	1
				Early pregnancy	Maternal mental health assessment	Self-rating Anxiety Scale (SAS)	20	1 min	normal	2022-07-05 11:29:12	Finish	1	1	1	1	1	1	1	1	1	1	1	1	1	1	1	1	1	1	1	1
				Early pregnancy	Maternal mental health assessment	Self-rating Anxiety Scale (SAS)	34	2 min	normal	2022-07-05 13:12:21	Finish	1	1	1	1	4	1	1	2	4	1	1	1	1	1	4	3	1	2	2	1
				Mid-pregnancy	Maternal mental health assessment	Self-rating Anxiety Scale (SAS)	38	2 min	normal	2022-07-05 14:24:01	Finish	2	2	2	1	4	1	1	3	2	2	1	1	3	1	2	3	2	1	3	1
				Early pregnancy	Maternal mental health assessment	Self-rating Anxiety Scale (SAS)	30	2 min	normal	2022-07-05 15:30:16	Finish	1	1	1	1	4	1	1	1	1	1	1	2	4	1	1	1	3	1	1	2
				Early pregnancy	Maternal mental health assessment	Self-rating Anxiety Scale (SAS)	37	2 min	normal	2022-07-05 17:13:22	Finish	2	2	1	1	4	1	1	2	2	2	2	1	2	1	2	3	2	2	2	2
				Early pregnancy	Maternal mental health assessment	Self-rating Anxiety Scale (SAS)	22	2 min	normal	2022-07-06 08:57:25	Finish	1	1	1	1	1	1	1	1	1	1	1	1	1	1	1	2	1	1	2	1
				Early pregnancy	Maternal mental health assessment	Self-rating Anxiety Scale (SAS)	26	4 min	normal	2022-07-06 09:10:13	Finish	1	1	1	1	1	1	1	1	1	1	1	1	4	1	1	2	3	1	1	1
				Early pregnancy	Maternal mental health assessment	Self-rating Anxiety Scale (SAS)	33	2 min	normal	2022-07-06 09:11:57	Finish	1	1	1	1	2	1	2	3	2	2	2	1	1	1	2	3	1	1	3	2
				Early pregnancy	Maternal mental health assessment	Self-rating Anxiety Scale (SAS)	34	2 min	normal	2022-07-06 09:25:24	Finish	3	1	1	1	1	1	1	2	2	2	2	1	1	1	3	3	2	1	2	3
				Mid-pregnancy	Maternal mental health assessment	Self-rating Anxiety Scale (SAS)	30	3 min	normal	2022-07-06 09:35:45	Finish	1	1	1	1	4	1	1	1	2	2	1	1	1	1	1	2	3	1	3	1
				Early pregnancy	Maternal mental health assessment	Self-rating Anxiety Scale (SAS)	40	2 min	normal	2022-07-06 09:44:12	Finish	3	3	2	1	3	1	3	3	2	2	1	1	1	1	1	3	1	1	4	3
				Early pregnancy	Maternal mental health assessment	Self-rating Anxiety Scale (SAS)	26	3 min	normal	2022-07-06 09:44:47	Finish	1	1	1	1	1	1	1	1	2	1	1	1	1	1	1	2	2	1	4	1
				Early pregnancy	Maternal mental health assessment	Self-rating Anxiety Scale (SAS)	29	2 min	normal	2022-07-06 09:47:37	Finish	1	1	1	1	3	1	1	1	2	1	1	1	2	1	1	3	3	1	2	1
				Early pregnancy	Maternal mental health assessment	Self-rating Anxiety Scale (SAS)	32	2 min	normal	2022-07-06 09:50:30	Finish	1	1	1	1	3	1	1	2	3	1	1	1	4	1	1	2	2	1	2	2
				Early pregnancy	Maternal mental health assessment	Self-rating Anxiety Scale (SAS)	38	2 min	normal	2022-07-06 09:52:55	Finish	1	1	1	1	4	1	2	1	4	2	2	1	4	1	2	1	4	1	2	2
				Early pregnancy	Maternal mental health assessment	Self-rating Anxiety Scale (SAS)	37	24 min	normal	2022-07-06 09:56:08	Finish	2	1	2	1	2	1	1	3	2	2	2	1	4	1	3	3	1	2	2	1
				Early pregnancy	Maternal mental health assessment	Self-rating Anxiety Scale (SAS)	38	3 min	normal	2022-07-06 10:02:06	Finish	3	1	3	1	3	1	2	4	3	1	1	1	2	2	1	3	2	1	2	1
				Early pregnancy	Maternal mental health assessment	Self-rating Anxiety Scale (SAS)	33	2 min	normal	2022-07-06 10:11:02	Finish	2	1	2	1	4	1	1	1	2	1	1	1	2	1	2	3	4	1	1	1
				Mid-pregnancy	Maternal mental health assessment	Self-rating Anxiety Scale (SAS)	34	4 min	normal	2022-07-06 10:15:04	Finish	1	1	1	1	4	1	1	2	4	1	1	1	1	1	3	3	1	1	4	1
				Early pregnancy	Maternal mental health assessment	Self-rating Anxiety Scale (SAS)	28	2 min	normal	2022-07-06 10:22:23	Finish	1	1	1	1	1	1	1	2	2	1	1	1	1	1	1	3	2	2	2	2
				Early pregnancy	Maternal mental health assessment	Self-rating Anxiety Scale (SAS)	42	2 min	normal	2022-07-06 10:25:36	Finish	2	1	2	2	3	2	2	2	3	3	2	2	2	1	2	2	3	1	3	2
				Early pregnancy	Maternal mental health assessment	Self-rating Anxiety Scale (SAS)	27	2 min	normal	2022-07-06 10:33:03	Finish	1	1	1	1	4	1	1	1	2	1	1	1	2	1	1	1	2	1	2	1
				Early pregnancy	Maternal mental health assessment	Self-rating Anxiety Scale (SAS)	29	3 min	normal	2022-07-06 10:35:57	Finish	2	2	2	1	2	1	1	2	2	1	1	1	1	1	1	3	1	1	2	1
				Early pregnancy	Maternal mental health assessment	Self-rating Anxiety Scale (SAS)	42	2 min	normal	2022-07-06 10:46:49	Finish	2	2	2	1	4	1	1	2	3	2	2	1	2	2	2	3	3	1	4	2
				Mid-pregnancy	Maternal mental health assessment	Self-rating Anxiety Scale (SAS)	33	1 min	normal	2022-07-06 10:49:06	Finish	1	1	1	1	2	1	1	1	4	1	1	1	2	3	2	2	2	2	2	2
				Early pregnancy	Maternal mental health assessment	Self-rating Anxiety Scale (SAS)	37	2 min	normal	2022-07-06 11:16:26	Finish	2	1	1	1	2	1	2	2	2	2	2	1	4	1	3	3	1	2	3	1
				Early pregnancy	Maternal mental health assessment	Self-rating Anxiety Scale (SAS)	30	2 min	normal	2022-07-06 11:27:11	Finish	1	1	1	1	1	1	1	1	1	1	1	1	1	1	1	2	4	4	4	1
				Early pregnancy	Maternal mental health assessment	Self-rating Anxiety Scale (SAS)	25	1 min	normal	2022-07-06 14:10:07	Finish	1	1	1	1	1	1	1	2	1	2	1	1	2	1	1	2	2	1	1	1
				Early pregnancy	Maternal mental health assessment	Self-rating Anxiety Scale (SAS)	26	2 min	normal	2022-07-06 14:18:32	Finish	1	1	1	1	2	1	2	2	1	1	1	1	1	1	1	2	2	1	2	1
				Early pregnancy	Maternal mental health assessment	Self-rating Anxiety Scale (SAS)	43	2 min	mild	2022-07-06 14:32:21	Finish	2	2	2	1	2	2	2	2	2	2	3	2	2	2	2	3	3	2	3	2
				Mid-pregnancy	Maternal mental health assessment	Self-rating Anxiety Scale (SAS)	29	1 min	normal	2022-07-06 14:46:58	Finish	1	1	1	1	4	1	1	1	1	1	1	1	4	1	1	2	2	1	2	1
				Early pregnancy	Maternal mental health assessment	Self-rating Anxiety Scale (SAS)	29	2 min	normal	2022-07-06 15:04:27	Finish	2	1	2	1	1	1	2	2	2	3	1	1	2	1	1	2	1	1	1	1
				Early pregnancy	Maternal mental health assessment	Self-rating Anxiety Scale (SAS)	28	14 min	normal	2022-07-06 15:15:26	Finish	2	1	1	1	4	1	1	1	2	1	2	1	1	1	1	2	2	1	1	1
				Early pregnancy	Maternal mental health assessment	Self-rating Anxiety Scale (SAS)	31	2 min	normal	2022-07-06 15:44:01	Finish	2	2	2	1	3	1	1	1	2	1	1	1	1	1	1	2	4	1	2	1
				Early pregnancy	Maternal mental health assessment	Self-rating Anxiety Scale (SAS)	25	3 min	normal	2022-07-06 15:51:00	Finish	2	1	2	1	1	1	1	2	2	1	1	1	2	1	1	1	1	1	1	1
				Early pregnancy	Maternal mental health assessment	Self-rating Anxiety Scale (SAS)	31	1 min	normal	2022-07-06 16:05:49	Finish	1	1	1	1	4	1	1	1	1	2	1	1	1	1	1	2	1	4	2	3
				Early pregnancy	Maternal mental health assessment	Self-rating Anxiety Scale (SAS)	25	12 min	normal	2022-07-07 08:42:36	Finish	1	1	1	1	1	1	1	1	1	1	2	2	1	1	3	1	1	1	2	1
				Early pregnancy	Maternal mental health assessment	Self-rating Anxiety Scale (SAS)	35	3 min	normal	2022-07-07 08:54:49	Finish	2	2	2	2	3	1	1	1	1	2	1	1	1	1	2	2	4	1	3	2
				Early pregnancy	Maternal mental health assessment	Self-rating Anxiety Scale (SAS)	27	4 min	normal	2022-07-07 08:58:06	Finish	1	1	1	1	4	1	1	1	2	1	1	1	1	1	2	1	2	2	1	1
				Mid-pregnancy	Maternal mental health assessment	Self-rating Anxiety Scale (SAS)	32	2 min	normal	2022-07-07 09:10:04	Finish	1	1	1	1	4	1	1	2	2	1	1	1	1	1	2	2	2	1	3	3
				Early pregnancy	Maternal mental health assessment	Self-rating Anxiety Scale (SAS)	20	2 min	normal	2022-07-07 09:35:42	Finish	1	1	1	1	1	1	1	1	1	1	1	1	1	1	1	1	1	1	1	1
				Early pregnancy	Maternal mental health assessment	Self-rating Anxiety Scale (SAS)	29	2 min	normal	2022-07-07 09:43:43	Finish	1	1	1	1	2	1	1	1	2	2	1	1	1	1	1	2	3	1	3	2
				Early pregnancy	Maternal mental health assessment	Self-rating Anxiety Scale (SAS)	27	2 min	normal	2022-07-07 09:50:56	Finish	2	1	1	1	2	1	1	2	2	1	1	1	1	1	2	1	2	1	2	1
				Early pregnancy	Maternal mental health assessment	Self-rating Anxiety Scale (SAS)	22	2 min	normal	2022-07-07 09:54:57	Finish	1	1	1	1	1	1	1	1	1	2	1	1	1	1	1	1	1	1	2	1
				Early pregnancy	Maternal mental health assessment	Self-rating Anxiety Scale (SAS)	33	2 min	normal	2022-07-07 09:58:38	Finish	2	1	1	1	4	1	1	1	2	2	1	1	4	1	1	3	2	1	2	1
				Early pregnancy	Maternal mental health assessment	Self-rating Anxiety Scale (SAS)	27	2 min	normal	2022-07-07 09:59:53	Finish	1	1	1	1	1	1	1	1	2	1	1	1	4	1	2	3	1	1	1	1
				Early pregnancy	Maternal mental health assessment	Self-rating Anxiety Scale (SAS)	26	2 min	normal	2022-07-07 10:07:57	Finish	2	1	1	1	1	2	1	1	1	2	1	1	1	1	2	1	2	2	1	1
				Mid-pregnancy	Maternal mental health assessment	Self-rating Anxiety Scale (SAS)	34	2 min	normal	2022-07-07 10:16:42	Finish	2	2	1	2	2	1	1	2	2	2	2	1	2	1	1	3	2	1	2	2
				Early pregnancy	Maternal mental health assessment	Self-rating Anxiety Scale (SAS)	30	2 min	normal	2022-07-07 10:20:37	Finish	1	1	1	1	1	1	2	3	1	1	1	2	1	1	1	4	4	1	1	1
				Early pregnancy	Maternal mental health assessment	Self-rating Anxiety Scale (SAS)	31	2 min	normal	2022-07-07 10:40:36	Finish	1	1	1	1	2	1	1	2	2	2	2	2	4	1	1	1	2	1	2	1
				Early pregnancy	Maternal mental health assessment	Self-rating Anxiety Scale (SAS)	23	2 min	normal	2022-07-07 10:44:47	Finish	1	1	1	1	4	1	1	1	1	1	1	1	1	1	1	1	1	1	1	1
				Early pregnancy	Maternal mental health assessment	Self-rating Anxiety Scale (SAS)	37	3 min	normal	2022-07-07 11:28:31	Finish	2	2	2	2	2	1	1	3	2	2	2	2	1	1	3	3	1	1	2	2
				Late pregnancy	Maternal mental health assessment	Self-rating Anxiety Scale (SAS)	22	2 min	normal	2022-07-07 11:29:09	Finish	1	1	1	1	2	1	1	1	2	1	1	1	1	1	1	1	1	1	1	1
				Early pregnancy	Maternal mental health assessment	Self-rating Anxiety Scale (SAS)	28	2 min	normal	2022-07-07 13:36:51	Finish	2	1	2	1	1	1	1	2	2	1	1	1	1	1	1	3	1	1	2	2
				Early pregnancy	Maternal mental health assessment	Self-rating Anxiety Scale (SAS)	26	2 min	normal	2022-07-07 14:06:20	Finish	1	1	1	1	2	1	1	1	2	1	1	1	2	1	1	1	3	1	2	1
				Mid-pregnancy	Maternal mental health assessment	Self-rating Anxiety Scale (SAS)	36	3 min	normal	2022-07-07 14:10:35	Finish	3	2	2	2	4	1	1	2	2	1	1	1	4	1	1	3	1	1	1	2
				Early pregnancy	Maternal mental health assessment	Self-rating Anxiety Scale (SAS)	29	3 min	normal	2022-07-07 14:15:43	Finish	1	1	1	1	4	1	1	2	2	2	1	1	1	1	1	2	2	1	1	2
				Early pregnancy	Maternal mental health assessment	Self-rating Anxiety Scale (SAS)	29	5 min	normal	2022-07-07 14:17:12	Finish	2	1	1	1	2	1	1	2	2	1	1	1	1	1	1	2	3	1	3	1
				Late pregnancy	Maternal mental health assessment	Self-rating Anxiety Scale (SAS)	30	2 min	normal	2022-07-07 14:28:33	Finish	1	1	1	1	1	1	1	2	2	2	2	1	1	2	1	3	2	2	2	1
				Early pregnancy	Maternal mental health assessment	Self-rating Anxiety Scale (SAS)	36	2 min	normal	2022-07-07 15:45:52	Finish	2	1	1	1	4	1	1	1	4	1	1	1	4	1	1	1	4	1	4	1
				Mid-pregnancy	Maternal mental health assessment	Self-rating Anxiety Scale (SAS)	35	3 min	normal	2022-07-07 15:56:04	Finish	2	1	2	1	4	1	2	2	3	2	2	1	1	1	2	2	1	1	1	3
				Early pregnancy	Maternal mental health assessment	Self-rating Anxiety Scale (SAS)	27	2 min	normal	2022-07-08 08:00:20	Finish	1	1	1	1	2	1	2	2	2	2	1	1	2	1	1	1	2	1	1	1
				Early pregnancy	Maternal mental health assessment	Self-rating Anxiety Scale (SAS)	31	2 min	normal	2022-07-08 08:04:34	Finish	1	1	1	1	4	1	1	1	2	1	1	1	1	1	1	3	3	1	4	1
				Early pregnancy	Maternal mental health assessment	Self-rating Anxiety Scale (SAS)	21	1 min	normal	2022-07-08 08:58:46	Finish	1	1	1	1	1	1	1	1	1	1	1	1	1	1	1	2	1	1	1	1
				Early pregnancy	Maternal mental health assessment	Self-rating Anxiety Scale (SAS)	32	4 min	normal	2022-07-08 09:01:24	Finish	3	2	2	1	1	1	1	1	1	2	2	1	1	1	3	3	1	2	2	1
				Early pregnancy	Maternal mental health assessment	Self-rating Anxiety Scale (SAS)	30	3 min	normal	2022-07-08 09:03:47	Finish	1	1	1	1	1	1	2	2	1	1	2	2	1	2	3	2	2	1	2	1
				Early pregnancy	Maternal mental health assessment	Self-rating Anxiety Scale (SAS)	24	2 min	normal	2022-07-08 09:19:41	Finish	1	1	1	1	1	1	2	2	1	1	1	1	1	1	1	2	1	1	2	1
				Early pregnancy	Maternal mental health assessment	Self-rating Anxiety Scale (SAS)	27	2 min	normal	2022-07-08 09:30:11	Finish	1	1	1	1	2	1	1	1	1	1	1	1	1	1	2	4	2	1	2	1
				Early pregnancy	Maternal mental health assessment	Self-rating Anxiety Scale (SAS)	32	2 min	normal	2022-07-08 09:34:01	Finish	2	1	1	1	2	1	2	3	2	2	1	1	1	1	2	2	2	2	2	1
				Early pregnancy	Maternal mental health assessment	Self-rating Anxiety Scale (SAS)	31	3 min	normal	2022-07-08 09:35:40	Finish	2	2	2	1	2	1	1	2	2	2	1	1	2	1	1	2	2	1	2	1
				Early pregnancy	Maternal mental health assessment	Self-rating Anxiety Scale (SAS)	30	3 min	normal	2022-07-08 09:36:43	Finish	1	1	1	1	1	1	1	3	2	1	1	1	2	1	2	3	2	1	3	1
				Early pregnancy	Maternal mental health assessment	Self-rating Anxiety Scale (SAS)	36	2 min	normal	2022-07-08 09:43:28	Finish	1	1	1	1	4	1	1	2	3	1	2	1	4	1	2	1	4	1	3	1
				Early pregnancy	Maternal mental health assessment	Self-rating Anxiety Scale (SAS)	30	2 min	normal	2022-07-08 09:53:06	Finish	1	1	1	1	4	1	1	1	4	1	1	1	1	1	1	2	3	1	2	1
				Early pregnancy	Maternal mental health assessment	Self-rating Anxiety Scale (SAS)	34	6 min	normal	2022-07-08 10:01:18	Finish	1	1	1	1	1	1	1	3	3	2	2	1	2	1	3	3	2	2	2	1
				Early pregnancy	Maternal mental health assessment	Self-rating Anxiety Scale (SAS)	26	2 min	normal	2022-07-08 10:02:24	Finish	1	1	1	1	3	1	1	1	4	1	1	1	1	1	2	1	1	1	1	1
				Early pregnancy	Maternal mental health assessment	Self-rating Anxiety Scale (SAS)	30	2 min	normal	2022-07-08 10:12:03	Finish	1	1	1	1	2	1	1	1	2	2	1	1	1	1	3	3	1	1	3	2
				Early pregnancy	Maternal mental health assessment	Self-rating Anxiety Scale (SAS)	22	2 min	normal	2022-07-08 10:14:38	Finish	2	2	1	1	1	1	1	1	1	1	1	1	1	1	1	1	1	1	1	1
				Early pregnancy	Maternal mental health assessment	Self-rating Anxiety Scale (SAS)	24	2 min	normal	2022-07-08 10:23:49	Finish	1	1	1	1	1	1	1	1	1	1	1	1	1	1	1	1	2	1	2	3
				Early pregnancy	Maternal mental health assessment	Self-rating Anxiety Scale (SAS)	25	2 min	normal	2022-07-08 10:24:13	Finish	1	1	1	1	1	1	1	1	1	1	1	1	4	1	1	1	1	1	2	2
				Early pregnancy	Maternal mental health assessment	Self-rating Anxiety Scale (SAS)	31	1 min	normal	2022-07-08 10:27:39	Finish	1	1	1	1	4	1	1	1	3	1	1	1	4	1	1	2	2	1	2	1
				Early pregnancy	Maternal mental health assessment	Self-rating Anxiety Scale (SAS)	34	1 min	normal	2022-07-08 10:28:05	Finish	1	1	1	1	4	1	1	1	4	1	1	1	4	1	1	2	4	1	1	2
				Early pregnancy	Maternal mental health assessment	Self-rating Anxiety Scale (SAS)	49	2 min	mild	2022-07-08 10:39:49	Finish	2	2	2	1	3	2	2	3	2	4	4	3	3	1	4	4	1	1	4	1
				Mid-pregnancy	Maternal mental health assessment	Self-rating Anxiety Scale (SAS)	44	2 min	mild	2022-07-08 11:31:51	Finish	3	2	3	3	4	1	1	3	4	2	1	1	1	1	2	3	1	1	4	3
				Early pregnancy	Maternal mental health assessment	Self-rating Anxiety Scale (SAS)	34	3 min	normal	2022-07-08 11:33:16	Finish	1	1	1	1	4	1	1	1	2	2	1	1	2	1	2	2	3	2	3	2
				Early pregnancy	Maternal mental health assessment	Self-rating Anxiety Scale (SAS)	30	2 min	normal	2022-07-08 11:34:32	Finish	1	1	1	1	4	1	1	1	4	1	1	1	1	1	1	2	4	1	1	1
				Early pregnancy	Maternal mental health assessment	Self-rating Anxiety Scale (SAS)	29	2 min	normal	2022-07-08 11:34:50	Finish	1	1	1	1	4	1	1	1	1	1	1	1	3	1	1	2	4	1	1	1
				Early pregnancy	Maternal mental health assessment	Self-rating Anxiety Scale (SAS)	33	4 min	normal	2022-07-08 11:49:09	Finish	2	1	1	1	2	1	1	2	3	2	1	1	4	1	2	2	2	1	2	1
				Early pregnancy	Maternal mental health assessment	Self-rating Anxiety Scale (SAS)	25	2 min	normal	2022-07-08 13:57:22	Finish	1	1	1	1	1	1	1	1	2	2	1	1	1	1	2	2	1	1	2	1
				Mid-pregnancy	Maternal mental health assessment	Self-rating Anxiety Scale (SAS)	37	2 min	normal	2022-07-08 14:03:47	Finish	1	1	1	1	4	1	1	1	4	1	1	1	4	1	2	2	4	1	3	2
				Mid-pregnancy	Maternal mental health assessment	Self-rating Anxiety Scale (SAS)	31	2 min	normal	2022-07-08 14:24:30	Finish	1	1	1	1	4	1	1	1	2	1	1	1	4	1	3	3	1	1	1	1
				Early pregnancy	Maternal mental health assessment	Self-rating Anxiety Scale (SAS)	25	2 min	normal	2022-07-08 14:36:53	Finish	3	1	1	1	2	1	1	1	1	1	1	1	1	1	1	2	1	1	1	2
				Early pregnancy	Maternal mental health assessment	Self-rating Anxiety Scale (SAS)	41	1 min	normal	2022-07-08 14:42:20	Finish	3	1	1	1	3	1	2	2	4	2	1	2	4	2	1	2	3	1	4	1
				Early pregnancy	Maternal mental health assessment	Self-rating Anxiety Scale (SAS)	44	1 min	mild	2022-07-09 09:37:39	Finish	2	2	2	2	3	2	2	2	3	2	2	2	3	2	2	2	3	2	3	1
				Early pregnancy	Maternal mental health assessment	Self-rating Anxiety Scale (SAS)	35	1 min	normal	2022-07-09 09:48:31	Finish	1	1	1	1	4	1	1	1	4	1	1	1	4	1	1	1	4	1	4	1
				Early pregnancy	Maternal mental health assessment	Self-rating Anxiety Scale (SAS)	32	2 min	normal	2022-07-09 09:52:16	Finish	1	1	1	1	4	1	1	1	4	1	1	1	4	1	1	2	2	1	2	1
				Early pregnancy	Maternal mental health assessment	Self-rating Anxiety Scale (SAS)	21	15 min	normal	2022-07-09 09:56:10	Finish	1	1	1	1	1	1	1	1	1	2	1	1	1	1	1	1	1	1	1	1
				Early pregnancy	Maternal mental health assessment	Self-rating Anxiety Scale (SAS)	33	2 min	normal	2022-07-09 10:00:47	Finish	1	1	2	1	3	1	3	2	3	2	2	1	2	1	1	2	1	1	2	1
				Early pregnancy	Maternal mental health assessment	Self-rating Anxiety Scale (SAS)	36	2 min	normal	2022-07-09 10:03:52	Finish	1	1	1	1	4	1	1	1	4	1	2	2	1	1	3	2	4	2	1	2
				Early pregnancy	Maternal mental health assessment	Self-rating Anxiety Scale (SAS)	25	2 min	normal	2022-07-09 10:12:14	Finish	1	1	1	1	3	1	1	1	2	1	1	1	1	1	1	2	2	1	1	1
				Early pregnancy	Maternal mental health assessment	Self-rating Anxiety Scale (SAS)	27	2 min	normal	2022-07-09 10:15:09	Finish	1	1	2	1	2	1	1	1	1	1	1	2	1	1	1	2	4	1	1	1
				Early pregnancy	Maternal mental health assessment	Self-rating Anxiety Scale (SAS)	29	2 min	normal	2022-07-09 10:18:27	Finish	2	1	1	1	2	1	2	3	1	2	1	2	2	1	1	1	1	1	2	1
				Early pregnancy	Maternal mental health assessment	Self-rating Anxiety Scale (SAS)	24	2 min	normal	2022-07-09 10:20:46	Finish	1	1	1	1	1	1	1	1	1	2	1	1	1	1	2	2	2	1	1	1
				Early pregnancy	Maternal mental health assessment	Self-rating Anxiety Scale (SAS)	35	4 min	normal	2022-07-09 10:22:15	Finish	2	2	2	1	3	1	2	2	2	2	1	1	2	1	1	3	2	1	3	1
				Early pregnancy	Maternal mental health assessment	Self-rating Anxiety Scale (SAS)	27	2 min	normal	2022-07-09 10:29:13	Finish	2	1	2	1	4	1	1	1	3	1	1	1	1	1	1	1	1	1	1	1
				Early pregnancy	Maternal mental health assessment	Self-rating Anxiety Scale (SAS)	22	1 min	normal	2022-07-09 10:31:42	Finish	1	1	1	1	1	1	1	1	1	2	1	1	2	1	1	1	1	1	1	1
				Mid-pregnancy	Maternal mental health assessment	Self-rating Anxiety Scale (SAS)	35	1 min	normal	2022-07-09 10:40:09	Finish	1	1	1	1	4	1	1	1	4	1	1	1	4	1	1	2	4	1	2	2
				Early pregnancy	Maternal mental health assessment	Self-rating Anxiety Scale (SAS)	32	14 min	normal	2022-07-09 10:53:44	Finish	1	1	1	1	4	1	1	2	2	2	1	1	2	1	1	3	2	2	2	1
				Early pregnancy	Maternal mental health assessment	Self-rating Anxiety Scale (SAS)	30	2 min	normal	2022-07-09 10:55:35	Finish	1	1	1	1	3	1	1	1	2	1	1	1	1	1	1	4	2	2	2	2
				Early pregnancy	Maternal mental health assessment	Self-rating Anxiety Scale (SAS)	33	3 min	normal	2022-07-09 11:11:11	Finish	2	2	1	1	1	1	1	1	2	1	2	2	1	1	2	3	2	2	2	3
				Early pregnancy	Maternal mental health assessment	Self-rating Anxiety Scale (SAS)	30	2 min	normal	2022-07-09 11:12:36	Finish	2	1	1	1	1	1	2	2	2	1	2	1	1	1	2	3	2	1	2	1
				Early pregnancy	Maternal mental health assessment	Self-rating Anxiety Scale (SAS)	21	2 min	normal	2022-07-09 11:24:28	Finish	1	1	1	1	1	1	1	2	1	1	1	1	1	1	1	1	1	1	1	1
				Early pregnancy	Maternal mental health assessment	Self-rating Anxiety Scale (SAS)	35	1 min	normal	2022-07-09 11:32:13	Finish	1	1	1	1	4	1	1	1	4	1	1	1	4	1	1	1	4	1	4	1
				Early pregnancy	Maternal mental health assessment	Self-rating Anxiety Scale (SAS)	24	1 min	normal	2022-07-09 11:33:10	Finish	1	1	1	1	4	1	1	1	1	2	1	1	1	1	1	1	1	1	1	1
				Early pregnancy	Maternal mental health assessment	Self-rating Anxiety Scale (SAS)	28	14 min	normal	2022-07-09 11:34:09	Finish	1	1	1	1	4	1	1	1	1	1	2	1	1	1	1	1	4	1	2	1
				Early pregnancy	Maternal mental health assessment	Self-rating Anxiety Scale (SAS)	35	1 min	normal	2022-07-09 11:38:48	Finish	1	1	1	1	4	1	1	1	4	1	1	1	4	1	1	1	4	1	4	1
				Early pregnancy	Maternal mental health assessment	Self-rating Anxiety Scale (SAS)	27	2 min	normal	2022-07-09 12:05:00	Finish	1	1	1	1	2	1	1	2	1	1	1	1	1	1	1	3	2	1	2	2
				Early pregnancy	Maternal mental health assessment	Self-rating Anxiety Scale (SAS)	31	2 min	normal	2022-07-09 12:54:39	Finish	1	1	1	1	2	1	1	3	2	2	2	1	1	1	3	3	1	1	2	1
				Early pregnancy	Maternal mental health assessment	Self-rating Anxiety Scale (SAS)	22	2 min	normal	2022-07-09 13:42:02	Finish	1	1	1	1	1	1	1	1	1	1	1	1	1	1	1	2	1	1	2	1
				Early pregnancy	Maternal mental health assessment	Self-rating Anxiety Scale (SAS)	27	2 min	normal	2022-07-09 14:11:38	Finish	1	1	1	1	4	1	1	1	1	1	1	1	1	1	1	2	1	1	1	4
				Early pregnancy	Maternal mental health assessment	Self-rating Anxiety Scale (SAS)	31	3 min	normal	2022-07-09 14:35:43	Finish	2	2	2	1	4	1	1	2	2	1	2	1	1	1	1	2	2	1	1	1
				Early pregnancy	Maternal mental health assessment	Self-rating Anxiety Scale (SAS)	28	2 min	normal	2022-07-09 15:04:00	Finish	1	1	1	1	4	1	1	1	4	1	1	1	1	1	1	1	1	1	2	2
				Mid-pregnancy	Maternal mental health assessment	Self-rating Anxiety Scale (SAS)	45	1 min	mild	2022-07-09 15:13:55	Finish	2	2	2	2	3	2	2	2	3	2	2	2	3	2	2	2	3	2	3	2
				Mid-pregnancy	Maternal mental health assessment	Self-rating Anxiety Scale (SAS)	23	2 min	normal	2022-07-09 15:31:34	Finish	1	1	1	1	4	1	1	1	1	1	1	1	1	1	1	1	1	1	1	1
				Early pregnancy	Maternal mental health assessment	Self-rating Anxiety Scale (SAS)	37	2 min	normal	2022-07-09 15:54:59	Finish	1	1	1	1	4	1	1	1	4	1	1	1	4	1	2	2	4	1	4	1
				Early pregnancy	Maternal mental health assessment	Self-rating Anxiety Scale (SAS)	31	2 min	normal	2022-07-11 08:46:39	Finish	1	1	1	1	1	1	1	2	2	2	2	1	1	2	2	3	2	1	2	2
				Early pregnancy	Maternal mental health assessment	Self-rating Anxiety Scale (SAS)	35	1 min	normal	2022-07-11 09:07:07	Finish	1	1	1	1	4	1	1	1	3	1	1	1	4	1	1	2	3	2	3	2
				Early pregnancy	Maternal mental health assessment	Self-rating Anxiety Scale (SAS)	39	2 min	normal	2022-07-11 09:13:51	Finish	3	2	2	1	4	1	1	3	3	1	1	1	2	1	1	3	4	1	3	1
				Early pregnancy	Maternal mental health assessment	Self-rating Anxiety Scale (SAS)	26	3 min	normal	2022-07-11 09:25:02	Finish	1	1	1	1	2	1	1	2	2	1	1	1	1	1	1	1	3	1	2	1
				Early pregnancy	Maternal mental health assessment	Self-rating Anxiety Scale (SAS)	28	2 min	normal	2022-07-11 09:35:42	Finish	1	1	1	1	1	1	2	2	2	2	1	1	1	1	1	2	3	1	2	1
				Early pregnancy	Maternal mental health assessment	Self-rating Anxiety Scale (SAS)	22	2 min	normal	2022-07-11 09:39:30	Finish	1	1	1	1	1	1	1	1	1	1	1	1	1	1	1	2	2	1	1	1
				Early pregnancy	Maternal mental health assessment	Self-rating Anxiety Scale (SAS)	38	2 min	normal	2022-07-11 10:01:17	Finish	2	1	1	2	4	1	1	2	4	2	1	1	1	1	2	3	4	3	1	1
				Early pregnancy	Maternal mental health assessment	Self-rating Anxiety Scale (SAS)	30	2 min	normal	2022-07-11 10:13:37	Finish	2	1	1	1	2	1	1	2	2	1	1	2	2	1	2	2	2	2	1	1
				Early pregnancy	Maternal mental health assessment	Self-rating Anxiety Scale (SAS)	40	2 min	normal	2022-07-11 10:37:48	Finish	2	2	2	2	3	1	1	2	2	2	2	1	2	1	3	3	2	2	2	3
				Early pregnancy	Maternal mental health assessment	Self-rating Anxiety Scale (SAS)	35	2 min	normal	2022-07-11 11:05:25	Finish	2	2	2	1	2	1	1	2	2	1	1	2	2	1	3	1	4	1	3	1
				Early pregnancy	Maternal mental health assessment	Self-rating Anxiety Scale (SAS)	22	2 min	normal	2022-07-11 11:05:57	Finish	1	1	1	1	2	1	1	2	1	1	1	1	1	1	1	1	1	1	1	1
				Early pregnancy	Maternal mental health assessment	Self-rating Anxiety Scale (SAS)	25	1 min	normal	2022-07-11 11:30:52	Finish	1	1	1	1	1	1	1	2	1	1	3	2	2	1	1	1	1	1	1	1
				Early pregnancy	Maternal mental health assessment	Self-rating Anxiety Scale (SAS)	25	3 min	normal	2022-07-11 13:05:20	Finish	1	1	1	1	1	1	1	1	2	4	1	1	1	1	1	1	1	1	2	1
				Early pregnancy	Maternal mental health assessment	Self-rating Anxiety Scale (SAS)	22	2 min	normal	2022-07-11 13:40:11	Finish	1	1	1	1	1	1	1	1	1	1	1	1	1	1	1	2	2	1	1	1
				Early pregnancy	Maternal mental health assessment	Self-rating Anxiety Scale (SAS)	30	3 min	normal	2022-07-11 13:42:33	Finish	1	1	1	1	2	1	1	3	1	1	1	1	1	2	1	2	2	3	3	1
				Mid-pregnancy	Maternal mental health assessment	Self-rating Anxiety Scale (SAS)	29	3 min	normal	2022-07-11 14:21:35	Finish	1	1	2	1	4	1	1	2	1	2	1	1	1	1	1	2	3	1	1	1
				Early pregnancy	Maternal mental health assessment	Self-rating Anxiety Scale (SAS)	27	1 min	normal	2022-07-11 14:58:33	Finish	1	1	1	1	4	1	1	1	2	1	1	1	1	1	1	3	2	1	1	1
				Early pregnancy	Maternal mental health assessment	Self-rating Anxiety Scale (SAS)	23	1 min	normal	2022-07-12 07:52:05	Finish	1	1	1	1	4	1	1	1	1	1	1	1	1	1	1	1	1	1	1	1
				Early pregnancy	Maternal mental health assessment	Self-rating Anxiety Scale (SAS)	32	5 min	normal	2022-07-12 07:54:50	Finish	1	2	2	1	2	2	1	3	2	2	1	1	1	1	3	2	1	2	1	1
				Early pregnancy	Maternal mental health assessment	Self-rating Anxiety Scale (SAS)	27	2 min	normal	2022-07-12 09:06:14	Finish	1	1	1	1	2	1	1	2	1	1	1	1	4	1	1	2	1	1	2	1
				Early pregnancy	Maternal mental health assessment	Self-rating Anxiety Scale (SAS)	33	2 min	normal	2022-07-12 09:19:34	Finish	2	2	2	2	3	1	1	1	3	1	1	1	1	1	3	2	1	1	3	1
				Early pregnancy	Maternal mental health assessment	Self-rating Anxiety Scale (SAS)	33	2 min	normal	2022-07-12 09:21:29	Finish	2	1	1	1	2	1	2	2	2	2	2	1	2	1	2	3	2	1	2	1
				Early pregnancy	Maternal mental health assessment	Self-rating Anxiety Scale (SAS)	23	2 min	normal	2022-07-12 09:21:49	Finish	1	1	1	1	1	1	1	2	1	1	1	1	1	1	1	2	1	2	1	1
				Early pregnancy	Maternal mental health assessment	Self-rating Anxiety Scale (SAS)	33	2 min	normal	2022-07-12 09:42:02	Finish	1	1	1	1	3	1	1	2	2	2	1	1	2	1	3	2	3	2	2	1
				Early pregnancy	Maternal mental health assessment	Self-rating Anxiety Scale (SAS)	32	2 min	normal	2022-07-12 09:42:41	Finish	1	1	1	1	2	1	1	3	2	2	1	1	2	1	2	3	2	2	2	1
				Early pregnancy	Maternal mental health assessment	Self-rating Anxiety Scale (SAS)	28	2 min	normal	2022-07-12 09:57:31	Finish	1	1	1	1	1	1	1	1	1	1	1	1	1	1	1	4	4	1	2	2
				Early pregnancy	Maternal mental health assessment	Self-rating Anxiety Scale (SAS)	29	2 min	normal	2022-07-12 10:03:35	Finish	1	1	1	1	1	1	1	2	1	2	1	1	4	1	1	2	1	1	1	4
				Early pregnancy	Maternal mental health assessment	Self-rating Anxiety Scale (SAS)	25	2 min	normal	2022-07-12 10:27:18	Finish	2	1	1	1	1	1	1	1	1	2	1	1	1	1	1	3	1	1	1	2
				Early pregnancy	Maternal mental health assessment	Self-rating Anxiety Scale (SAS)	29	43 min	normal	2022-07-12 10:45:02	Finish	1	1	1	1	4	1	1	1	4	1	1	1	1	1	1	1	3	2	1	1
				Early pregnancy	Maternal mental health assessment	Self-rating Anxiety Scale (SAS)	25	2 min	normal	2022-07-12 10:48:44	Finish	2	1	1	1	1	1	1	2	1	1	1	1	1	1	1	1	2	2	2	1
				Early pregnancy	Maternal mental health assessment	Self-rating Anxiety Scale (SAS)	23	1 min	normal	2022-07-12 11:00:50	Finish	1	1	1	1	2	1	1	1	1	1	1	1	1	1	1	1	2	1	2	1
				Early pregnancy	Maternal mental health assessment	Self-rating Anxiety Scale (SAS)	21	2 min	normal	2022-07-12 11:04:27	Finish	1	1	1	1	1	1	1	1	1	1	1	1	1	1	1	1	1	1	2	1
				Early pregnancy	Maternal mental health assessment	Self-rating Anxiety Scale (SAS)	33	16 min	normal	2022-07-12 11:09:17	Finish	1	1	1	1	4	1	1	2	4	1	1	1	4	1	1	1	3	1	2	1
				Early pregnancy	Maternal mental health assessment	Self-rating Anxiety Scale (SAS)	28	2 min	normal	2022-07-12 11:30:19	Finish	2	2	2	1	1	1	1	2	1	1	1	1	1	1	1	2	3	2	1	1
				Early pregnancy	Maternal mental health assessment	Self-rating Anxiety Scale (SAS)	38	2 min	normal	2022-07-12 12:04:18	Finish	1	1	1	1	1	1	3	3	3	2	2	1	2	1	3	3	3	1	4	1
				Early pregnancy	Maternal mental health assessment	Self-rating Anxiety Scale (SAS)	34	3 min	normal	2022-07-12 12:32:14	Finish	2	1	2	1	4	1	1	1	3	1	1	1	2	1	1	1	4	1	4	1
				Mid-pregnancy	Maternal mental health assessment	Self-rating Anxiety Scale (SAS)	39	2 min	normal	2022-07-12 14:08:22	Finish	1	1	1	1	2	1	3	3	2	2	3	2	2	1	2	3	3	1	4	1
				Early pregnancy	Maternal mental health assessment	Self-rating Anxiety Scale (SAS)	26	2 min	normal	2022-07-12 15:07:28	Finish	1	1	1	1	1	1	1	2	1	2	1	1	1	2	3	2	1	1	1	1
				Early pregnancy	Maternal mental health assessment	Self-rating Anxiety Scale (SAS)	21	2 min	normal	2022-07-12 15:12:18	Finish	1	1	1	1	1	1	1	1	1	1	1	1	1	1	1	2	1	1	1	1
				Early pregnancy	Maternal mental health assessment	Self-rating Anxiety Scale (SAS)	38	2 min	normal	2022-07-13 08:00:19	Finish	2	2	2	1	4	1	1	2	2	1	2	1	4	1	1	1	3	1	3	3
				Early pregnancy	Maternal mental health assessment	Self-rating Anxiety Scale (SAS)	35	2 min	normal	2022-07-13 08:18:08	Finish	1	1	2	1	2	1	2	2	2	2	2	1	2	1	2	3	2	2	3	1
				Early pregnancy	Maternal mental health assessment	Self-rating Anxiety Scale (SAS)	30	2 min	normal	2022-07-13 08:34:39	Finish	2	1	1	1	2	1	1	2	1	2	1	1	1	1	3	3	2	1	2	1
				Early pregnancy	Maternal mental health assessment	Self-rating Anxiety Scale (SAS)	35	2 min	normal	2022-07-13 08:41:55	Finish	1	1	1	1	2	1	1	3	2	2	1	1	2	1	2	3	3	2	3	2
				3 days after delivery	Maternal mental health assessment	Self-rating Anxiety Scale (SAS)	29	2 min	normal	2022-07-13 09:00:16	Finish	1	1	1	1	4	1	1	1	2	1	1	1	1	1	1	2	4	1	2	1
				Early pregnancy	Maternal mental health assessment	Self-rating Anxiety Scale (SAS)	27	3 min	normal	2022-07-13 09:28:08	Finish	1	1	1	1	2	1	1	2	3	1	2	2	1	1	1	2	1	1	1	1
				Early pregnancy	Maternal mental health assessment	Self-rating Anxiety Scale (SAS)	30	2 min	normal	2022-07-13 09:29:18	Finish	2	1	1	1	4	1	1	1	2	1	1	1	1	1	2	2	2	1	2	2
				Early pregnancy	Maternal mental health assessment	Self-rating Anxiety Scale (SAS)	32	3 min	normal	2022-07-13 09:35:13	Finish	1	1	1	1	4	1	1	1	4	1	1	1	4	1	1	2	1	1	2	2
				Early pregnancy	Maternal mental health assessment	Self-rating Anxiety Scale (SAS)	39	25 min	normal	2022-07-13 09:45:29	Finish	2	1	1	1	4	1	1	1	4	2	2	1	4	1	1	2	4	1	4	1
				Early pregnancy	Maternal mental health assessment	Self-rating Anxiety Scale (SAS)	32	2 min	normal	2022-07-13 10:16:22	Finish	1	1	1	1	4	1	2	2	4	1	1	1	1	1	2	3	1	1	2	1
				Mid-pregnancy	Maternal mental health assessment	Self-rating Anxiety Scale (SAS)	38	1 min	normal	2022-07-13 10:27:04	Finish	2	1	1	1	2	1	3	2	2	2	2	1	1	2	2	4	2	3	2	2
				Early pregnancy	Maternal mental health assessment	Self-rating Anxiety Scale (SAS)	36	3 min	normal	2022-07-13 10:35:45	Finish	2	1	2	1	4	1	1	2	2	2	1	1	2	1	2	2	3	1	3	2
				Early pregnancy	Maternal mental health assessment	Self-rating Anxiety Scale (SAS)	31	2 min	normal	2022-07-13 10:38:00	Finish	1	1	1	1	4	1	1	2	4	1	1	1	1	1	1	3	2	1	2	1
				Early pregnancy	Maternal mental health assessment	Self-rating Anxiety Scale (SAS)	34	2 min	normal	2022-07-13 10:57:13	Finish	1	1	1	1	3	1	2	1	3	1	1	1	4	1	1	1	4	1	4	1
				Early pregnancy	Maternal mental health assessment	Self-rating Anxiety Scale (SAS)	28	7 min	normal	2022-07-13 11:29:44	Finish	1	1	2	1	4	1	2	1	1	1	1	1	1	1	1	2	1	2	2	1
				Mid-pregnancy	Maternal mental health assessment	Self-rating Anxiety Scale (SAS)	31	143 min	normal	2022-07-13 13:33:44	Finish	2	1	1	1	4	1	2	2	3	1	1	1	1	1	2	2	2	1	1	1
				Early pregnancy	Maternal mental health assessment	Self-rating Anxiety Scale (SAS)	41	2 min	normal	2022-07-13 14:36:29	Finish	2	2	2	2	3	2	2	2	2	2	2	1	2	2	3	2	2	1	3	2
				Early pregnancy	Maternal mental health assessment	Self-rating Anxiety Scale (SAS)	27	2 min	normal	2022-07-13 14:47:42	Finish	1	1	1	1	4	1	1	1	1	1	1	1	1	1	1	2	4	1	1	1
				Early pregnancy	Maternal mental health assessment	Self-rating Anxiety Scale (SAS)	37	2 min	normal	2022-07-13 15:54:09	Finish	2	1	1	1	4	1	1	2	3	1	1	2	4	1	1	2	2	1	4	2
				Early pregnancy	Maternal mental health assessment	Self-rating Anxiety Scale (SAS)	35	1 min	normal	2022-07-13 16:00:01	Finish	1	1	1	1	4	1	1	1	4	1	1	1	4	1	1	1	4	1	4	1
				Early pregnancy	Maternal mental health assessment	Self-rating Anxiety Scale (SAS)	33	2 min	normal	2022-07-14 08:16:36	Finish	1	1	2	1	1	1	1	3	1	2	2	2	1	1	4	3	1	2	1	2
				Early pregnancy	Maternal mental health assessment	Self-rating Anxiety Scale (SAS)	20	2 min	normal	2022-07-14 08:53:11	Finish	1	1	1	1	1	1	1	1	1	1	1	1	1	1	1	1	1	1	1	1
				Early pregnancy	Maternal mental health assessment	Self-rating Anxiety Scale (SAS)	28	4 min	normal	2022-07-14 09:13:08	Finish	1	2	1	1	2	1	1	2	2	1	1	1	2	1	2	1	2	1	2	1
				Early pregnancy	Maternal mental health assessment	Self-rating Anxiety Scale (SAS)	25	2 min	normal	2022-07-14 09:17:14	Finish	1	1	1	1	1	1	1	1	1	1	1	2	4	1	2	1	1	1	1	1
				Early pregnancy	Maternal mental health assessment	Self-rating Anxiety Scale (SAS)	32	14 min	normal	2022-07-14 09:24:50	Finish	1	1	1	1	4	1	1	2	2	1	1	1	1	1	3	3	3	1	1	2
				Early pregnancy	Maternal mental health assessment	Self-rating Anxiety Scale (SAS)	23	2 min	normal	2022-07-14 09:41:57	Finish	1	1	1	1	1	1	1	3	1	1	1	1	1	1	1	1	2	1	1	1
				Early pregnancy	Maternal mental health assessment	Self-rating Anxiety Scale (SAS)	26	2 min	normal	2022-07-14 09:54:59	Finish	2	2	1	1	1	1	1	1	1	1	1	1	4	1	1	1	1	1	2	1
				Early pregnancy	Maternal mental health assessment	Self-rating Anxiety Scale (SAS)	26	2 min	normal	2022-07-14 10:15:07	Finish	1	1	1	1	1	1	1	1	1	1	1	2	1	1	1	3	4	1	1	1
				Early pregnancy	Maternal mental health assessment	Self-rating Anxiety Scale (SAS)	30	2 min	normal	2022-07-14 10:18:36	Finish	1	1	1	1	4	1	1	1	4	2	1	1	4	1	1	1	1	1	1	1
				Early pregnancy	Maternal mental health assessment	Self-rating Anxiety Scale (SAS)	23	2 min	normal	2022-07-14 10:31:49	Finish	1	1	1	1	1	1	1	1	1	2	1	1	1	1	1	3	1	1	1	1
				3 days after delivery	Maternal mental health assessment	Self-rating Anxiety Scale (SAS)	23	3 min	normal	2022-07-14 10:32:59	Finish	1	1	1	1	1	1	1	1	1	2	1	1	1	1	1	3	1	1	1	1
				Early pregnancy	Maternal mental health assessment	Self-rating Anxiety Scale (SAS)	31	3 min	normal	2022-07-14 10:45:51	Finish	2	1	1	1	4	1	1	2	1	1	1	1	1	1	3	3	1	1	2	2
				Early pregnancy	Maternal mental health assessment	Self-rating Anxiety Scale (SAS)	33	2 min	normal	2022-07-14 10:53:40	Finish	2	1	2	1	3	1	1	1	4	2	1	1	2	1	1	3	2	2	1	1
				Early pregnancy	Maternal mental health assessment	Self-rating Anxiety Scale (SAS)	24	2 min	normal	2022-07-14 11:03:40	Finish	1	1	1	1	1	1	1	1	1	1	2	1	1	1	2	2	1	1	2	1
				Early pregnancy	Maternal mental health assessment	Self-rating Anxiety Scale (SAS)	35	1 min	normal	2022-07-14 11:05:27	Finish	1	1	1	1	4	1	1	1	4	1	1	1	4	1	1	1	4	1	4	1
				Early pregnancy	Maternal mental health assessment	Self-rating Anxiety Scale (SAS)	29	2 min	normal	2022-07-14 11:16:12	Finish	1	1	1	1	4	1	1	1	4	1	1	1	1	1	1	3	1	1	2	1
				Early pregnancy	Maternal mental health assessment	Self-rating Anxiety Scale (SAS)	30	3 min	normal	2022-07-14 12:23:36	Finish	1	1	1	1	1	1	1	2	2	3	1	1	1	1	3	3	1	2	2	1
				Early pregnancy	Maternal mental health assessment	Self-rating Anxiety Scale (SAS)	35	2 min	normal	2022-07-14 13:39:32	Finish	2	1	1	1	4	1	1	1	4	1	1	1	4	1	1	2	2	1	4	1
				Early pregnancy	Maternal mental health assessment	Self-rating Anxiety Scale (SAS)	32	2 min	normal	2022-07-14 14:14:25	Finish	2	1	1	1	4	1	1	1	2	1	1	1	2	1	1	2	3	1	3	2
				Early pregnancy	Maternal mental health assessment	Self-rating Anxiety Scale (SAS)	28	3 min	normal	2022-07-14 14:21:53	Finish	1	1	1	1	4	1	1	1	2	1	1	1	2	1	1	2	1	1	3	1
				Early pregnancy	Maternal mental health assessment	Self-rating Anxiety Scale (SAS)	25	2 min	normal	2022-07-14 14:24:44	Finish	1	1	1	1	1	1	1	2	1	1	1	1	1	1	1	3	2	1	2	1
				Mid-pregnancy	Maternal mental health assessment	Self-rating Anxiety Scale (SAS)	33	2 min	normal	2022-07-14 14:49:21	Finish	2	1	2	1	4	1	1	1	2	2	1	1	2	2	2	2	1	2	2	1
				Early pregnancy	Maternal mental health assessment	Self-rating Anxiety Scale (SAS)	28	2 min	normal	2022-07-14 15:02:23	Finish	1	1	1	1	1	1	1	1	2	2	1	1	1	1	2	3	2	2	1	2
				Early pregnancy	Maternal mental health assessment	Self-rating Anxiety Scale (SAS)	36	2 min	normal	2022-07-15 07:39:39	Finish	2	1	1	1	4	1	1	1	4	1	1	1	4	1	1	1	4	1	4	1
				Early pregnancy	Maternal mental health assessment	Self-rating Anxiety Scale (SAS)	25	2 min	normal	2022-07-15 08:45:31	Finish	1	1	1	1	1	1	1	1	1	1	1	1	1	1	1	4	2	2	1	1
				Early pregnancy	Maternal mental health assessment	Self-rating Anxiety Scale (SAS)	32	2 min	normal	2022-07-15 09:27:06	Finish	1	1	1	1	1	1	1	1	1	1	1	1	4	1	2	3	2	2	2	4
				Early pregnancy	Maternal mental health assessment	Self-rating Anxiety Scale (SAS)	49	3 min	mild	2022-07-15 09:28:40	Finish	2	2	2	1	3	1	3	3	3	2	3	2	2	2	3	4	3	2	4	2
				Early pregnancy	Maternal mental health assessment	Self-rating Anxiety Scale (SAS)	39	2 min	normal	2022-07-15 09:35:53	Finish	2	2	1	1	4	1	1	2	2	2	2	1	4	2	2	2	3	2	2	1
				Early pregnancy	Maternal mental health assessment	Self-rating Anxiety Scale (SAS)	28	3 min	normal	2022-07-15 09:37:13	Finish	1	1	1	1	4	1	1	1	3	1	1	1	1	1	1	1	4	1	1	1
				Early pregnancy	Maternal mental health assessment	Self-rating Anxiety Scale (SAS)	25	16 min	normal	2022-07-15 09:37:54	Finish	1	1	1	1	4	1	1	2	1	1	1	1	1	1	1	2	1	1	1	1
				Early pregnancy	Maternal mental health assessment	Self-rating Anxiety Scale (SAS)	33	2 min	normal	2022-07-15 09:57:07	Finish	1	1	1	1	4	1	2	1	2	1	1	1	2	1	2	3	2	1	4	1
				Early pregnancy	Maternal mental health assessment	Self-rating Anxiety Scale (SAS)	34	1 min	normal	2022-07-15 09:59:59	Finish	2	1	1	1	4	1	1	1	4	1	1	1	4	1	1	1	4	1	2	1
				Early pregnancy	Maternal mental health assessment	Self-rating Anxiety Scale (SAS)	29	3 min	normal	2022-07-15 10:00:10	Finish	2	1	2	1	1	1	1	2	1	1	1	1	1	1	3	2	2	1	2	2
				Early pregnancy	Maternal mental health assessment	Self-rating Anxiety Scale (SAS)	27	1 min	normal	2022-07-15 10:03:59	Finish	2	1	1	1	1	1	1	2	1	1	1	1	2	1	1	2	4	1	1	1
				Early pregnancy	Maternal mental health assessment	Self-rating Anxiety Scale (SAS)	32	2 min	normal	2022-07-15 10:12:59	Finish	1	1	1	1	2	2	1	3	1	2	1	1	3	2	2	3	1	1	2	1
				Early pregnancy	Maternal mental health assessment	Self-rating Anxiety Scale (SAS)	34	1 min	normal	2022-07-15 10:15:24	Finish	1	1	2	1	1	1	1	2	2	2	2	1	1	2	2	3	2	2	3	2
				Early pregnancy	Maternal mental health assessment	Self-rating Anxiety Scale (SAS)	23	2 min	normal	2022-07-15 10:17:45	Finish	1	1	1	1	1	1	1	1	1	1	1	1	1	1	1	3	1	1	1	2
				Early pregnancy	Maternal mental health assessment	Self-rating Anxiety Scale (SAS)	38	1 min	normal	2022-07-15 10:26:13	Finish	2	1	2	1	4	1	2	2	2	2	1	1	1	1	4	3	2	1	2	3
				Early pregnancy	Maternal mental health assessment	Self-rating Anxiety Scale (SAS)	36	2 min	normal	2022-07-15 10:29:29	Finish	1	1	1	1	3	1	2	3	1	1	1	1	4	2	1	3	3	1	4	1
				Early pregnancy	Maternal mental health assessment	Self-rating Anxiety Scale (SAS)	39	1 min	normal	2022-07-15 10:29:32	Finish	1	1	1	1	4	1	1	2	3	2	2	1	4	2	1	2	4	1	4	1
				Early pregnancy	Maternal mental health assessment	Self-rating Anxiety Scale (SAS)	33	11 min	normal	2022-07-15 10:37:04	Finish	1	1	1	1	4	1	1	1	4	1	1	1	4	1	2	2	3	1	1	1
				Early pregnancy	Maternal mental health assessment	Self-rating Anxiety Scale (SAS)	32	2 min	normal	2022-07-15 10:38:44	Finish	2	1	2	1	4	1	1	3	1	2	1	1	1	1	1	3	2	1	2	1
				Early pregnancy	Maternal mental health assessment	Self-rating Anxiety Scale (SAS)	30	2 min	normal	2022-07-15 11:00:49	Finish	1	1	1	1	4	1	1	2	2	1	1	1	2	1	2	2	2	1	1	2
				Early pregnancy	Maternal mental health assessment	Self-rating Anxiety Scale (SAS)	23	2 min	normal	2022-07-15 11:04:21	Finish	1	1	1	1	4	1	1	1	1	1	1	1	1	1	1	1	1	1	1	1
				Early pregnancy	Maternal mental health assessment	Self-rating Anxiety Scale (SAS)	25	2 min	normal	2022-07-15 11:06:38	Finish	1	1	1	1	1	1	1	2	1	1	1	1	2	1	1	2	2	1	2	1
				Early pregnancy	Maternal mental health assessment	Self-rating Anxiety Scale (SAS)	27	3 min	normal	2022-07-15 11:26:47	Finish	1	1	1	1	1	1	1	2	2	1	1	1	1	4	2	1	1	1	1	2
				Early pregnancy	Maternal mental health assessment	Self-rating Anxiety Scale (SAS)	20	37 min	normal	2022-07-15 12:05:10	Finish	1	1	1	1	1	1	1	1	1	1	1	1	1	1	1	1	1	1	1	1
				Early pregnancy	Maternal mental health assessment	Self-rating Anxiety Scale (SAS)	33	2 min	normal	2022-07-15 14:01:11	Finish	1	1	2	1	1	1	1	3	2	2	1	1	1	1	2	3	1	4	3	1
				Early pregnancy	Maternal mental health assessment	Self-rating Anxiety Scale (SAS)	25	2 min	normal	2022-07-15 14:11:36	Finish	1	1	1	1	1	1	1	1	1	1	1	1	1	1	1	2	1	2	2	3
				Early pregnancy	Maternal mental health assessment	Self-rating Anxiety Scale (SAS)	21	7 min	normal	2022-07-15 14:40:47	Finish	1	1	1	1	1	1	1	1	1	1	1	1	1	1	1	2	1	1	1	1
				Early pregnancy	Maternal mental health assessment	Self-rating Anxiety Scale (SAS)	23	2 min	normal	2022-07-15 16:00:03	Finish	1	1	1	1	1	1	1	1	1	1	1	1	1	1	1	2	2	2	1	1
				Early pregnancy	Maternal mental health assessment	Self-rating Anxiety Scale (SAS)	40	2 min	normal	2022-07-16 08:11:18	Finish	2	2	2	2	2	1	1	1	4	1	1	2	3	2	2	2	3	2	3	2
				Early pregnancy	Maternal mental health assessment	Self-rating Anxiety Scale (SAS)	44	2 min	mild	2022-07-16 08:12:02	Finish	3	2	2	1	2	2	2	2	2	2	2	2	3	2	2	3	2	2	4	2
				Early pregnancy	Maternal mental health assessment	Self-rating Anxiety Scale (SAS)	27	2 min	normal	2022-07-16 08:21:34	Finish	1	1	1	1	2	1	1	1	2	1	1	1	1	1	1	3	2	1	3	1
				Early pregnancy	Maternal mental health assessment	Self-rating Anxiety Scale (SAS)	34	6 min	normal	2022-07-16 09:26:51	Finish	2	1	1	1	4	1	2	1	2	3	1	1	3	1	1	1	4	1	2	1
				Early pregnancy	Maternal mental health assessment	Self-rating Anxiety Scale (SAS)	21	2 min	normal	2022-07-16 09:30:57	Finish	1	1	1	1	1	1	1	1	1	1	1	1	1	1	1	2	1	1	1	1
				Early pregnancy	Maternal mental health assessment	Self-rating Anxiety Scale (SAS)	35	3 min	normal	2022-07-16 09:33:39	Finish	1	1	1	1	1	1	2	3	1	1	2	1	2	1	3	3	4	1	4	1
				Early pregnancy	Maternal mental health assessment	Self-rating Anxiety Scale (SAS)	35	3 min	normal	2022-07-16 09:46:41	Finish	2	1	1	1	2	1	2	2	2	2	2	1	1	1	3	3	1	3	2	2
				Early pregnancy	Maternal mental health assessment	Self-rating Anxiety Scale (SAS)	30	1 min	normal	2022-07-16 10:02:57	Finish	1	1	1	1	2	1	1	2	2	1	1	1	4	1	3	1	2	1	2	1
				Early pregnancy	Maternal mental health assessment	Self-rating Anxiety Scale (SAS)	24	2 min	normal	2022-07-16 10:04:24	Finish	1	1	1	1	2	1	1	1	1	1	1	1	1	1	1	3	1	1	2	1
				Early pregnancy	Maternal mental health assessment	Self-rating Anxiety Scale (SAS)	34	2 min	normal	2022-07-16 10:10:49	Finish	1	1	1	1	1	1	2	2	2	2	3	1	2	1	1	3	3	2	2	2
				Early pregnancy	Maternal mental health assessment	Self-rating Anxiety Scale (SAS)	28	9 min	normal	2022-07-16 10:13:50	Finish	2	1	1	1	2	2	1	2	2	2	1	1	1	1	1	2	1	1	2	1
				Early pregnancy	Maternal mental health assessment	Self-rating Anxiety Scale (SAS)	28	2 min	normal	2022-07-16 10:19:19	Finish	2	1	1	1	1	1	1	2	1	2	1	1	1	1	2	2	1	2	2	2
				Early pregnancy	Maternal mental health assessment	Self-rating Anxiety Scale (SAS)	28	2 min	normal	2022-07-16 10:23:30	Finish	2	1	1	1	2	1	1	2	2	1	1	1	2	1	1	2	2	1	2	1
				Early pregnancy	Maternal mental health assessment	Self-rating Anxiety Scale (SAS)	33	2 min	normal	2022-07-16 10:23:43	Finish	1	1	1	1	4	1	1	2	3	1	1	1	4	1	2	2	1	1	2	2
				Early pregnancy	Maternal mental health assessment	Self-rating Anxiety Scale (SAS)	29	2 min	normal	2022-07-16 10:24:07	Finish	2	1	1	1	2	1	1	2	2	1	1	1	2	1	1	3	1	1	3	1
				Early pregnancy	Maternal mental health assessment	Self-rating Anxiety Scale (SAS)	24	2 min	normal	2022-07-16 10:30:16	Finish	1	1	1	1	1	1	1	1	1	1	1	1	1	4	2	1	1	1	1	1
				Early pregnancy	Maternal mental health assessment	Self-rating Anxiety Scale (SAS)	29	2 min	normal	2022-07-16 10:33:10	Finish	1	1	1	1	4	1	1	2	1	2	2	1	1	1	1	3	1	1	2	1
				Early pregnancy	Maternal mental health assessment	Self-rating Anxiety Scale (SAS)	24	2 min	normal	2022-07-16 10:36:16	Finish	1	1	1	1	1	1	1	1	1	1	1	1	1	1	1	1	4	1	2	1
				Early pregnancy	Maternal mental health assessment	Self-rating Anxiety Scale (SAS)	21	2 min	normal	2022-07-16 10:50:11	Finish	1	1	1	1	1	1	1	1	1	1	1	1	1	1	1	1	1	1	2	1
				Early pregnancy	Maternal mental health assessment	Self-rating Anxiety Scale (SAS)	34	3 min	normal	2022-07-16 10:53:30	Finish	2	1	1	1	4	2	1	1	4	2	1	1	4	1	1	2	1	1	2	1
				Early pregnancy	Maternal mental health assessment	Self-rating Anxiety Scale (SAS)	26	2 min	normal	2022-07-16 10:56:24	Finish	1	1	1	1	2	1	1	1	2	1	1	1	1	1	1	2	2	1	2	2
				Early pregnancy	Maternal mental health assessment	Self-rating Anxiety Scale (SAS)	35	1 min	normal	2022-07-16 11:03:00	Finish	2	1	1	1	2	1	2	2	3	1	1	1	4	1	1	1	4	1	2	3
				Early pregnancy	Maternal mental health assessment	Self-rating Anxiety Scale (SAS)	28	2 min	normal	2022-07-16 11:03:49	Finish	1	1	1	1	2	1	1	2	1	1	2	1	1	1	2	2	2	2	2	1
				Early pregnancy	Maternal mental health assessment	Self-rating Anxiety Scale (SAS)	28	1 min	normal	2022-07-16 11:13:34	Finish	2	2	2	1	2	1	1	1	1	1	1	1	4	1	1	1	1	2	1	1
				Early pregnancy	Maternal mental health assessment	Self-rating Anxiety Scale (SAS)	27	2 min	normal	2022-07-16 11:15:19	Finish	1	1	1	1	1	1	1	3	2	2	1	1	2	1	1	2	2	1	1	1
				Early pregnancy	Maternal mental health assessment	Self-rating Anxiety Scale (SAS)	31	2 min	normal	2022-07-16 11:17:01	Finish	1	1	2	1	4	1	1	2	1	1	1	1	2	2	1	3	2	1	2	1
				Early pregnancy	Maternal mental health assessment	Self-rating Anxiety Scale (SAS)	36	1 min	normal	2022-07-16 11:33:53	Finish	1	1	1	1	4	1	1	1	4	1	1	1	4	1	1	2	4	1	4	1
				Early pregnancy	Maternal mental health assessment	Self-rating Anxiety Scale (SAS)	28	4 min	normal	2022-07-16 11:49:48	Finish	2	2	2	1	4	1	1	1	1	1	1	1	1	1	1	3	1	1	1	1
				Early pregnancy	Maternal mental health assessment	Self-rating Anxiety Scale (SAS)	30	1 min	normal	2022-07-16 11:50:32	Finish	2	2	1	1	2	1	1	2	2	1	1	1	2	1	1	3	2	1	2	1
				Mid-pregnancy	Maternal mental health assessment	Self-rating Anxiety Scale (SAS)	35	2 min	normal	2022-07-16 13:51:07	Finish	2	2	2	2	3	3	1	1	3	3	1	1	1	1	1	3	2	1	1	1
				Early pregnancy	Maternal mental health assessment	Self-rating Anxiety Scale (SAS)	33	2 min	normal	2022-07-16 14:12:20	Finish	1	1	1	1	2	1	3	3	2	3	1	1	1	1	1	3	2	3	1	1
				Early pregnancy	Maternal mental health assessment	Self-rating Anxiety Scale (SAS)	25	2 min	normal	2022-07-16 14:33:59	Finish	1	1	1	1	1	1	1	2	1	1	1	1	1	1	2	3	1	1	2	1
				Early pregnancy	Maternal mental health assessment	Self-rating Anxiety Scale (SAS)	36	2 min	normal	2022-07-16 14:35:41	Finish	2	2	2	2	3	2	1	3	3	2	1	1	2	1	1	1	4	1	1	1
				Early pregnancy	Maternal mental health assessment	Self-rating Anxiety Scale (SAS)	32	1 min	normal	2022-07-16 14:51:17	Finish	1	1	1	1	2	1	1	2	1	2	1	1	2	1	1	4	1	3	3	2
				Mid-pregnancy	Maternal mental health assessment	Self-rating Anxiety Scale (SAS)	40	3 min	normal	2022-07-16 15:57:44	Finish	2	1	2	1	2	2	2	1	3	2	2	1	2	1	2	3	3	2	3	3
				Early pregnancy	Maternal mental health assessment	Self-rating Anxiety Scale (SAS)	29	3 min	normal	2022-07-18 08:47:53	Finish	1	1	1	1	4	1	1	1	2	1	1	1	1	1	2	3	1	2	2	1
				Early pregnancy	Maternal mental health assessment	Self-rating Anxiety Scale (SAS)	32	2 min	normal	2022-07-18 08:50:50	Finish	2	1	1	1	4	1	1	2	4	2	1	1	1	2	1	3	1	1	1	1
				Early pregnancy	Maternal mental health assessment	Self-rating Anxiety Scale (SAS)	29	2 min	normal	2022-07-18 09:03:14	Finish	1	1	1	1	1	1	2	2	2	1	1	1	3	1	2	3	2	1	1	1
				Early pregnancy	Maternal mental health assessment	Self-rating Anxiety Scale (SAS)	24	2 min	normal	2022-07-18 09:29:10	Finish	1	1	1	1	1	1	1	1	1	1	1	1	1	1	1	3	3	1	1	1
				Early pregnancy	Maternal mental health assessment	Self-rating Anxiety Scale (SAS)	40	15 min	normal	2022-07-18 09:32:06	Finish	2	1	2	1	2	1	2	2	2	3	3	2	4	1	2	3	1	2	2	2
				Early pregnancy	Maternal mental health assessment	Self-rating Anxiety Scale (SAS)	28	5 min	normal	2022-07-18 10:01:30	Finish	1	1	1	1	4	1	1	1	2	1	1	1	1	1	1	3	1	1	3	1
				Early pregnancy	Maternal mental health assessment	Self-rating Anxiety Scale (SAS)	30	2 min	normal	2022-07-18 10:07:06	Finish	1	1	1	1	4	1	1	1	4	1	1	1	1	1	1	3	2	1	2	1
				Early pregnancy	Maternal mental health assessment	Self-rating Anxiety Scale (SAS)	32	2 min	normal	2022-07-18 10:11:15	Finish	1	1	1	1	2	1	2	1	1	2	2	2	2	1	2	3	2	1	2	2
				Early pregnancy	Maternal mental health assessment	Self-rating Anxiety Scale (SAS)	26	2 min	normal	2022-07-18 10:12:01	Finish	1	1	1	1	1	1	1	2	2	1	1	1	2	1	1	2	1	1	3	1
				Mid-pregnancy	Maternal mental health assessment	Self-rating Anxiety Scale (SAS)	25	1 min	normal	2022-07-18 10:25:57	Finish	1	1	1	1	4	1	1	1	2	1	1	1	1	1	1	1	2	1	1	1
				Early pregnancy	Maternal mental health assessment	Self-rating Anxiety Scale (SAS)	33	2 min	normal	2022-07-18 10:40:20	Finish	1	1	2	1	1	1	1	4	3	1	1	1	2	1	4	4	1	1	1	1
				Early pregnancy	Maternal mental health assessment	Self-rating Anxiety Scale (SAS)	25	1 min	normal	2022-07-18 11:05:50	Finish	1	1	1	1	1	1	1	1	1	1	1	1	4	1	1	3	1	1	1	1
				Early pregnancy	Maternal mental health assessment	Self-rating Anxiety Scale (SAS)	31	2 min	normal	2022-07-18 11:12:00	Finish	1	1	1	1	4	1	1	2	4	1	1	1	1	2	1	2	3	1	1	1
				Early pregnancy	Maternal mental health assessment	Self-rating Anxiety Scale (SAS)	21	2 min	normal	2022-07-18 11:19:22	Finish	1	1	1	1	1	1	1	1	1	1	1	1	1	1	1	1	2	1	1	1
				Early pregnancy	Maternal mental health assessment	Self-rating Anxiety Scale (SAS)	26	2 min	normal	2022-07-18 11:22:49	Finish	2	1	1	1	2	1	1	1	2	1	1	1	2	1	1	1	2	1	2	1
				Early pregnancy	Maternal mental health assessment	Self-rating Anxiety Scale (SAS)	20	1 min	normal	2022-07-18 14:53:22	Finish	1	1	1	1	1	1	1	1	1	1	1	1	1	1	1	1	1	1	1	1
				Early pregnancy	Maternal mental health assessment	Self-rating Anxiety Scale (SAS)	29	2 min	normal	2022-07-18 14:57:32	Finish	1	1	1	1	4	1	1	2	1	2	2	1	1	1	2	2	1	1	2	1
				Mid-pregnancy	Maternal mental health assessment	Self-rating Anxiety Scale (SAS)	29	3 min	normal	2022-07-18 15:00:43	Finish	2	2	1	1	1	1	1	1	1	2	2	2	3	1	1	3	1	1	1	1
				Early pregnancy	Maternal mental health assessment	Self-rating Anxiety Scale (SAS)	30	2 min	normal	2022-07-18 15:09:21	Finish	2	1	1	1	2	1	1	1	2	1	1	1	1	1	2	2	2	1	3	3
				Early pregnancy	Maternal mental health assessment	Self-rating Anxiety Scale (SAS)	40	1 min	normal	2022-07-18 15:09:27	Finish	1	1	1	1	4	1	1	1	2	2	2	3	3	2	2	2	3	1	4	3
				Early pregnancy	Maternal mental health assessment	Self-rating Anxiety Scale (SAS)	34	2 min	normal	2022-07-18 15:55:53	Finish	2	1	1	1	4	1	1	1	4	1	1	2	1	1	2	2	4	1	2	1
				Early pregnancy	Maternal mental health assessment	Self-rating Anxiety Scale (SAS)	20	2 min	normal	2022-07-19 08:15:54	Finish	1	1	1	1	1	1	1	1	1	1	1	1	1	1	1	1	1	1	1	1
				Early pregnancy	Maternal mental health assessment	Self-rating Anxiety Scale (SAS)	24	2 min	normal	2022-07-19 08:56:20	Finish	1	1	1	1	1	1	1	1	1	1	1	1	1	1	1	3	1	1	3	1
				Early pregnancy	Maternal mental health assessment	Self-rating Anxiety Scale (SAS)	24	2 min	normal	2022-07-19 09:24:06	Finish	1	1	1	1	1	1	1	1	1	1	1	1	1	1	1	2	3	1	2	1
				Early pregnancy	Maternal mental health assessment	Self-rating Anxiety Scale (SAS)	38	2 min	normal	2022-07-19 09:34:12	Finish	2	1	1	1	4	1	1	1	3	2	1	1	4	1	3	2	4	1	3	1
				Early pregnancy	Maternal mental health assessment	Self-rating Anxiety Scale (SAS)	22	1 min	normal	2022-07-19 09:36:04	Finish	1	1	1	1	1	1	1	2	1	1	1	1	1	1	1	2	1	1	1	1
				Early pregnancy	Maternal mental health assessment	Self-rating Anxiety Scale (SAS)	27	4 min	normal	2022-07-19 09:36:21	Finish	1	1	1	1	4	1	2	1	1	1	1	1	1	1	1	1	2	1	3	1
				Early pregnancy	Maternal mental health assessment	Self-rating Anxiety Scale (SAS)	39	29 min	normal	2022-07-19 09:41:27	Finish	1	1	1	1	4	1	1	1	4	1	2	2	4	1	1	3	4	2	3	1
				Early pregnancy	Maternal mental health assessment	Self-rating Anxiety Scale (SAS)	30	3 min	normal	2022-07-19 09:43:11	Finish	2	1	1	1	4	1	1	2	1	1	1	1	1	1	2	3	2	1	2	1
				Early pregnancy	Maternal mental health assessment	Self-rating Anxiety Scale (SAS)	32	2 min	normal	2022-07-19 09:55:11	Finish	2	2	2	1	2	1	1	2	2	1	1	1	1	1	2	1	2	2	2	3
				Early pregnancy	Maternal mental health assessment	Self-rating Anxiety Scale (SAS)	23	2 min	normal	2022-07-19 09:56:05	Finish	1	1	1	1	1	1	1	2	1	1	1	1	1	1	2	1	1	1	2	1
				Early pregnancy	Maternal mental health assessment	Self-rating Anxiety Scale (SAS)	26	3 min	normal	2022-07-19 09:57:35	Finish	1	1	1	1	4	1	1	1	4	1	1	1	1	1	1	1	1	1	1	1
				Early pregnancy	Maternal mental health assessment	Self-rating Anxiety Scale (SAS)	26	2 min	normal	2022-07-19 10:03:54	Finish	1	2	2	1	1	1	1	2	2	1	1	2	1	1	1	2	1	1	1	1
				Early pregnancy	Maternal mental health assessment	Self-rating Anxiety Scale (SAS)	25	2 min	normal	2022-07-19 10:06:22	Finish	1	1	1	1	4	1	1	1	1	1	1	1	1	1	2	1	1	1	2	1
				Early pregnancy	Maternal mental health assessment	Self-rating Anxiety Scale (SAS)	29	3 min	normal	2022-07-19 10:12:28	Finish	1	1	1	1	4	1	1	2	1	1	1	1	1	1	1	2	3	1	2	2
				Early pregnancy	Maternal mental health assessment	Self-rating Anxiety Scale (SAS)	33	2 min	normal	2022-07-19 10:15:49	Finish	2	1	1	1	1	1	1	2	2	2	3	2	2	1	2	2	2	2	2	1
				Early pregnancy	Maternal mental health assessment	Self-rating Anxiety Scale (SAS)	35	1 min	normal	2022-07-19 10:19:48	Finish	1	1	1	1	4	1	1	1	4	1	1	1	4	1	1	2	2	1	4	2
				Early pregnancy	Maternal mental health assessment	Self-rating Anxiety Scale (SAS)	25	2 min	normal	2022-07-19 10:24:44	Finish	1	1	1	1	4	1	1	1	2	1	1	1	1	1	1	1	1	1	2	1
				Late pregnancy	Maternal mental health assessment	Self-rating Anxiety Scale (SAS)	50	2 min	mild	2022-07-19 10:32:36	Finish	3	3	3	3	3	2	2	2	3	2	2	2	3	2	2	3	2	3	3	2
				Early pregnancy	Maternal mental health assessment	Self-rating Anxiety Scale (SAS)	23	63 min	normal	2022-07-19 10:42:09	Finish	1	1	1	1	1	1	1	1	1	1	1	1	1	1	2	2	2	1	1	1
				Early pregnancy	Maternal mental health assessment	Self-rating Anxiety Scale (SAS)	31	3 min	normal	2022-07-19 11:23:26	Finish	1	1	1	1	4	1	1	1	2	1	1	1	2	1	1	2	4	1	3	1
				Mid-pregnancy	Maternal mental health assessment	Self-rating Anxiety Scale (SAS)	34	1 min	normal	2022-07-19 11:26:13	Finish	1	1	1	1	4	1	1	1	2	2	2	1	4	1	1	2	2	1	3	2
				Early pregnancy	Maternal mental health assessment	Self-rating Anxiety Scale (SAS)	33	2 min	normal	2022-07-19 11:31:27	Finish	1	1	1	1	4	1	1	1	4	1	1	1	4	1	1	1	4	2	1	1
				Early pregnancy	Maternal mental health assessment	Self-rating Anxiety Scale (SAS)	34	3 min	normal	2022-07-19 14:12:26	Finish	1	1	1	1	4	1	2	2	2	1	2	1	2	1	2	3	2	1	3	1
				Early pregnancy	Maternal mental health assessment	Self-rating Anxiety Scale (SAS)	30	1 min	normal	2022-07-19 14:22:59	Finish	1	1	1	1	2	2	1	1	4	1	1	2	1	1	2	1	4	1	1	1
				Mid-pregnancy	Maternal mental health assessment	Self-rating Anxiety Scale (SAS)	56	3 min	中度	2022-07-19 14:29:26	Finish	2	1	4	4	3	4	4	4	3	1	4	1	1	4	4	3	4	1	3	1
				Early pregnancy	Maternal mental health assessment	Self-rating Anxiety Scale (SAS)	37	3 min	normal	2022-07-19 14:54:58	Finish	3	1	2	1	4	1	1	2	3	2	1	1	4	1	1	2	1	2	3	1
				Early pregnancy	Maternal mental health assessment	Self-rating Anxiety Scale (SAS)	28	3 min	normal	2022-07-20 08:41:28	Finish	1	1	1	1	4	1	1	1	2	1	1	1	2	1	1	2	2	1	2	1
				Early pregnancy	Maternal mental health assessment	Self-rating Anxiety Scale (SAS)	28	2 min	normal	2022-07-20 09:04:31	Finish	1	1	1	1	2	1	1	2	2	1	1	1	1	1	1	3	3	1	2	1
				Early pregnancy	Maternal mental health assessment	Self-rating Anxiety Scale (SAS)	34	20 min	normal	2022-07-20 09:10:08	Finish	3	2	2	1	3	1	1	2	2	1	1	1	2	1	3	3	1	1	2	1
				Early pregnancy	Maternal mental health assessment	Self-rating Anxiety Scale (SAS)	32	1 min	normal	2022-07-20 09:17:42	Finish	2	1	2	1	2	1	2	2	2	1	1	1	1	1	3	3	2	1	2	1
				Early pregnancy	Maternal mental health assessment	Self-rating Anxiety Scale (SAS)	27	2 min	normal	2022-07-20 09:21:59	Finish	1	1	1	1	1	1	1	3	1	1	1	1	1	1	1	3	2	1	3	1
				Early pregnancy	Maternal mental health assessment	Self-rating Anxiety Scale (SAS)	30	3 min	normal	2022-07-20 09:23:34	Finish	2	1	1	1	2	1	1	1	2	1	1	1	1	1	1	3	3	1	3	2
				Early pregnancy	Maternal mental health assessment	Self-rating Anxiety Scale (SAS)	30	3 min	normal	2022-07-20 09:27:27	Finish	1	1	1	1	4	1	1	3	2	1	1	1	1	1	1	3	2	1	2	1
				Early pregnancy	Maternal mental health assessment	Self-rating Anxiety Scale (SAS)	35	6 min	normal	2022-07-20 09:43:52	Finish	2	1	2	1	1	1	3	3	2	2	2	1	4	1	2	1	2	1	2	1
				Early pregnancy	Maternal mental health assessment	Self-rating Anxiety Scale (SAS)	29	2 min	normal	2022-07-20 09:48:31	Finish	1	1	1	1	4	1	1	1	4	1	1	1	4	1	1	1	1	1	1	1
				Early pregnancy	Maternal mental health assessment	Self-rating Anxiety Scale (SAS)	24	2 min	normal	2022-07-20 10:01:27	Finish	1	1	1	1	1	1	1	2	1	1	1	1	1	1	2	2	1	1	2	1
				Early pregnancy	Maternal mental health assessment	Self-rating Anxiety Scale (SAS)	36	12 min	normal	2022-07-20 10:02:17	Finish	2	1	1	1	2	1	2	2	4	1	2	2	4	1	1	3	2	1	1	2
				Early pregnancy	Maternal mental health assessment	Self-rating Anxiety Scale (SAS)	24	4 min	normal	2022-07-20 10:40:47	Finish	1	1	1	1	1	1	1	1	1	1	1	1	4	1	1	1	1	1	2	1
				Early pregnancy	Maternal mental health assessment	Self-rating Anxiety Scale (SAS)	35	3 min	normal	2022-07-20 10:55:26	Finish	1	1	1	1	3	1	1	1	4	1	1	1	4	1	2	3	3	1	3	1
				Mid-pregnancy	Maternal mental health assessment	Self-rating Anxiety Scale (SAS)	38	3 min	normal	2022-07-20 11:02:19	Finish	2	2	2	2	2	1	1	2	2	2	1	1	3	1	2	2	2	2	4	2
				Late pregnancy	Maternal mental health assessment	Self-rating Anxiety Scale (SAS)	26	1 min	normal	2022-07-20 11:09:31	Finish	2	1	1	1	2	1	1	2	2	1	1	1	2	1	1	1	1	1	2	1
				Early pregnancy	Maternal mental health assessment	Self-rating Anxiety Scale (SAS)	25	2 min	normal	2022-07-20 11:13:32	Finish	2	1	1	1	2	1	1	1	1	2	1	1	1	1	1	2	1	1	2	1
				Early pregnancy	Maternal mental health assessment	Self-rating Anxiety Scale (SAS)	42	2 min	normal	2022-07-20 11:32:46	Finish	2	1	2	1	3	1	3	1	3	4	3	1	2	1	2	2	2	2	3	3
				Early pregnancy	Maternal mental health assessment	Self-rating Anxiety Scale (SAS)	30	163 min	normal	2022-07-20 13:37:17	Finish	2	1	1	1	1	1	1	1	2	1	1	1	4	1	1	2	2	1	3	2
				Early pregnancy	Maternal mental health assessment	Self-rating Anxiety Scale (SAS)	35	1 min	normal	2022-07-20 14:33:27	Finish	1	1	1	1	4	1	1	1	4	1	1	1	4	1	1	1	4	1	4	1
				Early pregnancy	Maternal mental health assessment	Self-rating Anxiety Scale (SAS)	25	8 min	normal	2022-07-20 14:54:41	Finish	1	1	1	1	2	1	1	1	2	1	1	1	2	1	1	1	2	1	2	1
				Mid-pregnancy	Maternal mental health assessment	Self-rating Anxiety Scale (SAS)	43	2 min	mild	2022-07-20 15:11:00	Finish	1	1	1	2	3	1	2	2	4	2	1	1	3	2	2	3	2	3	4	3
				Early pregnancy	Maternal mental health assessment	Self-rating Anxiety Scale (SAS)	25	3 min	normal	2022-07-20 18:36:22	Finish	1	1	1	1	4	1	1	1	2	1	1	1	1	1	1	1	1	2	1	1
				Early pregnancy	Maternal mental health assessment	Self-rating Anxiety Scale (SAS)	23	3 min	normal	2022-07-20 23:07:00	Finish	1	1	1	1	1	1	1	2	2	1	1	1	1	1	1	1	1	1	2	1
				Early pregnancy	Maternal mental health assessment	Self-rating Anxiety Scale (SAS)	24	1 min	normal	2022-07-21 08:13:52	Finish	2	1	1	1	1	1	1	2	1	1	1	1	1	1	2	2	1	1	1	1
				Early pregnancy	Maternal mental health assessment	Self-rating Anxiety Scale (SAS)	24	2 min	normal	2022-07-21 08:56:57	Finish	1	1	1	1	4	1	1	1	1	1	1	1	1	1	2	1	1	1	1	1
				Early pregnancy	Maternal mental health assessment	Self-rating Anxiety Scale (SAS)	37	2 min	normal	2022-07-21 09:01:55	Finish	1	1	1	1	4	1	1	3	1	1	1	3	3	1	1	4	3	1	4	1
				Early pregnancy	Maternal mental health assessment	Self-rating Anxiety Scale (SAS)	38	2 min	normal	2022-07-21 09:03:53	Finish	2	1	2	1	1	1	2	3	2	2	2	2	2	1	3	3	3	1	2	2
				Early pregnancy	Maternal mental health assessment	Self-rating Anxiety Scale (SAS)	31	3 min	normal	2022-07-21 09:04:24	Finish	1	1	1	1	2	1	1	3	2	1	1	1	2	1	2	3	2	1	2	2
				Early pregnancy	Maternal mental health assessment	Self-rating Anxiety Scale (SAS)	43	4 min	mild	2022-07-21 09:06:55	Finish	2	2	2	1	2	1	2	3	2	3	2	2	4	1	2	3	2	2	2	3
				Early pregnancy	Maternal mental health assessment	Self-rating Anxiety Scale (SAS)	28	3 min	normal	2022-07-21 09:08:51	Finish	3	2	2	1	2	1	1	2	1	2	1	1	1	1	1	1	1	1	2	1
				Early pregnancy	Maternal mental health assessment	Self-rating Anxiety Scale (SAS)	27	2 min	normal	2022-07-21 09:27:49	Finish	1	1	1	1	1	1	1	1	1	1	2	1	1	1	2	3	2	2	1	2
				Early pregnancy	Maternal mental health assessment	Self-rating Anxiety Scale (SAS)	53	3 min	中度	2022-07-21 09:32:35	Finish	4	4	4	3	3	1	3	4	3	4	2	1	1	1	4	3	1	2	2	3
				Early pregnancy	Maternal mental health assessment	Self-rating Anxiety Scale (SAS)	22	2 min	normal	2022-07-21 09:34:24	Finish	1	1	1	1	1	1	1	1	1	1	1	1	1	1	1	2	1	1	1	2
				Early pregnancy	Maternal mental health assessment	Self-rating Anxiety Scale (SAS)	38	3 min	normal	2022-07-21 09:45:12	Finish	2	2	2	1	4	1	1	2	4	2	1	1	1	1	2	1	3	1	2	4
				Early pregnancy	Maternal mental health assessment	Self-rating Anxiety Scale (SAS)	45	2 min	mild	2022-07-21 09:51:58	Finish	2	2	2	2	3	1	2	2	3	2	2	2	2	2	2	3	4	2	2	3
				Late pregnancy	Maternal mental health assessment	Self-rating Anxiety Scale (SAS)	29	5 min	normal	2022-07-21 09:55:48	Finish	2	1	1	1	4	1	1	1	4	1	1	1	1	1	1	2	1	1	2	1
				Early pregnancy	Maternal mental health assessment	Self-rating Anxiety Scale (SAS)	29	2 min	normal	2022-07-21 09:59:52	Finish	1	1	1	1	4	1	1	1	4	1	2	2	1	1	2	1	1	1	1	1
				Early pregnancy	Maternal mental health assessment	Self-rating Anxiety Scale (SAS)	26	2 min	normal	2022-07-21 10:06:46	Finish	1	1	1	1	2	1	1	1	4	1	2	1	1	1	1	2	1	1	1	1
				Early pregnancy	Maternal mental health assessment	Self-rating Anxiety Scale (SAS)	21	9 min	normal	2022-07-21 10:08:03	Finish	1	1	1	1	1	1	1	1	1	1	1	1	1	2	1	1	1	1	1	1
				Early pregnancy	Maternal mental health assessment	Self-rating Anxiety Scale (SAS)	30	2 min	normal	2022-07-21 10:16:54	Finish	1	1	1	1	4	1	1	1	3	2	1	1	1	1	1	2	3	1	2	1
				Mid-pregnancy	Maternal mental health assessment	Self-rating Anxiety Scale (SAS)	34	2 min	normal	2022-07-21 10:17:31	Finish	1	1	1	1	4	1	3	2	4	2	1	1	1	1	3	2	1	1	2	1
				Early pregnancy	Maternal mental health assessment	Self-rating Anxiety Scale (SAS)	33	2 min	normal	2022-07-21 10:27:30	Finish	2	1	1	1	4	1	1	1	4	2	2	2	1	1	1	2	2	1	2	1
				Early pregnancy	Maternal mental health assessment	Self-rating Anxiety Scale (SAS)	35	2 min	normal	2022-07-21 10:49:06	Finish	1	1	1	1	4	1	1	1	4	1	1	1	4	1	1	1	4	1	4	1
				Early pregnancy	Maternal mental health assessment	Self-rating Anxiety Scale (SAS)	22	2 min	normal	2022-07-21 12:12:24	Finish	1	1	1	1	1	1	1	2	1	1	1	1	1	1	1	1	1	1	2	1
				Early pregnancy	Maternal mental health assessment	Self-rating Anxiety Scale (SAS)	37	1 min	normal	2022-07-21 13:49:34	Finish	1	1	1	1	4	1	1	2	4	1	1	1	4	1	1	2	4	1	3	2
				Mid-pregnancy	Maternal mental health assessment	Self-rating Anxiety Scale (SAS)	22	2 min	normal	2022-07-21 14:04:16	Finish	1	1	1	1	1	1	1	1	1	1	1	1	1	1	1	3	1	1	1	1
				Early pregnancy	Maternal mental health assessment	Self-rating Anxiety Scale (SAS)	35	2 min	normal	2022-07-21 15:49:12	Finish	1	1	1	1	4	1	1	2	3	1	1	2	2	1	1	3	4	1	3	1
				Early pregnancy	Maternal mental health assessment	Self-rating Anxiety Scale (SAS)	26	2 min	normal	2022-07-22 07:50:49	Finish	2	1	2	1	1	1	1	3	1	1	1	1	1	1	1	3	1	1	1	1
				Early pregnancy	Maternal mental health assessment	Self-rating Anxiety Scale (SAS)	24	3 min	normal	2022-07-22 07:56:02	Finish	1	1	1	1	1	1	1	2	1	2	2	1	1	1	1	1	2	1	1	1
				Early pregnancy	Maternal mental health assessment	Self-rating Anxiety Scale (SAS)	31	1 min	normal	2022-07-22 08:24:10	Finish	1	1	1	1	2	1	1	1	2	1	1	1	4	1	2	2	4	1	2	1
				Early pregnancy	Maternal mental health assessment	Self-rating Anxiety Scale (SAS)	28	2 min	normal	2022-07-22 08:43:24	Finish	1	1	1	1	1	1	1	2	1	2	2	1	2	1	2	2	1	1	3	1
				Early pregnancy	Maternal mental health assessment	Self-rating Anxiety Scale (SAS)	33	4 min	normal	2022-07-22 08:53:55	Finish	1	1	1	1	4	1	1	1	4	2	1	1	4	1	1	1	3	1	2	1
				Early pregnancy	Maternal mental health assessment	Self-rating Anxiety Scale (SAS)	25	2 min	normal	2022-07-22 09:04:35	Finish	1	1	1	1	4	1	1	1	2	1	1	1	1	1	1	1	1	1	2	1
				Early pregnancy	Maternal mental health assessment	Self-rating Anxiety Scale (SAS)	23	3 min	normal	2022-07-22 09:15:11	Finish	1	1	1	1	1	1	1	2	1	1	1	1	1	1	1	2	1	1	2	1
				Early pregnancy	Maternal mental health assessment	Self-rating Anxiety Scale (SAS)	27	2 min	normal	2022-07-22 09:37:00	Finish	1	1	1	1	4	1	1	1	4	1	1	1	1	1	1	2	1	1	1	1
				Early pregnancy	Maternal mental health assessment	Self-rating Anxiety Scale (SAS)	35	3 min	normal	2022-07-22 09:38:47	Finish	2	2	2	1	2	1	1	2	2	2	2	1	1	1	2	3	3	2	2	1
				Early pregnancy	Maternal mental health assessment	Self-rating Anxiety Scale (SAS)	30	2 min	normal	2022-07-22 09:40:50	Finish	2	1	1	1	2	1	2	2	2	1	2	1	1	1	2	3	1	1	2	1
				Early pregnancy	Maternal mental health assessment	Self-rating Anxiety Scale (SAS)	30	1 min	normal	2022-07-22 09:41:24	Finish	1	1	1	1	4	1	1	1	4	1	1	1	1	1	2	2	2	1	2	1
				Early pregnancy	Maternal mental health assessment	Self-rating Anxiety Scale (SAS)	27	16 min	normal	2022-07-22 09:43:39	Finish	2	1	1	1	1	1	1	2	1	1	1	1	4	1	3	1	1	1	1	1
				Early pregnancy	Maternal mental health assessment	Self-rating Anxiety Scale (SAS)	51	4 min	中度	2022-07-22 09:44:33	Finish	3	2	3	2	2	1	3	2	3	2	3	3	2	3	3	4	2	3	3	2
				Early pregnancy	Maternal mental health assessment	Self-rating Anxiety Scale (SAS)	29	2 min	normal	2022-07-22 09:48:28	Finish	2	1	1	1	1	1	1	2	2	2	2	2	2	1	2	1	1	1	2	1
				Early pregnancy	Maternal mental health assessment	Self-rating Anxiety Scale (SAS)	32	2 min	normal	2022-07-22 09:59:11	Finish	2	1	1	1	3	1	1	1	2	1	1	1	4	1	2	2	2	2	2	1
				Early pregnancy	Maternal mental health assessment	Self-rating Anxiety Scale (SAS)	28	3 min	normal	2022-07-22 10:03:17	Finish	1	1	1	1	4	1	1	2	1	2	1	1	1	1	1	2	1	2	2	1
				Early pregnancy	Maternal mental health assessment	Self-rating Anxiety Scale (SAS)	45	3 min	mild	2022-07-22 10:06:52	Finish	2	2	3	2	3	1	1	3	3	1	2	1	2	1	4	3	2	3	3	3
				Early pregnancy	Maternal mental health assessment	Self-rating Anxiety Scale (SAS)	27	2 min	normal	2022-07-22 10:33:14	Finish	2	2	1	1	2	1	1	1	2	1	1	1	1	1	1	2	1	1	3	1
				Early pregnancy	Maternal mental health assessment	Self-rating Anxiety Scale (SAS)	30	20 min	normal	2022-07-22 11:01:59	Finish	1	1	1	1	4	1	1	1	4	1	1	1	1	1	1	3	2	1	2	1
				Early pregnancy	Maternal mental health assessment	Self-rating Anxiety Scale (SAS)	24	2 min	normal	2022-07-22 11:13:16	Finish	1	1	1	1	1	1	2	2	1	1	1	1	1	1	1	1	1	2	2	1
				Early pregnancy	Maternal mental health assessment	Self-rating Anxiety Scale (SAS)	27	1 min	normal	2022-07-22 11:38:17	Finish	1	1	1	1	4	1	1	1	4	1	1	1	1	1	2	1	1	1	1	1
				Early pregnancy	Maternal mental health assessment	Self-rating Anxiety Scale (SAS)	26	2 min	normal	2022-07-22 13:54:16	Finish	1	1	1	1	2	1	1	1	2	1	1	1	2	1	1	2	2	1	2	1
				Early pregnancy	Maternal mental health assessment	Self-rating Anxiety Scale (SAS)	26	2 min	normal	2022-07-22 14:19:43	Finish	1	1	1	1	2	1	1	1	2	1	1	2	1	1	1	2	2	1	2	1
				Early pregnancy	Maternal mental health assessment	Self-rating Anxiety Scale (SAS)	27	2 min	normal	2022-07-22 14:46:24	Finish	1	1	1	1	1	1	1	1	3	2	2	1	1	1	2	1	1	2	1	2
				Early pregnancy	Maternal mental health assessment	Self-rating Anxiety Scale (SAS)	45	2 min	mild	2022-07-22 14:49:41	Finish	2	2	2	2	3	1	2	3	2	2	4	1	2	2	2	2	3	2	2	4
				Early pregnancy	Maternal mental health assessment	Self-rating Anxiety Scale (SAS)	28	2 min	normal	2022-07-23 08:49:18	Finish	1	1	1	1	4	1	1	2	1	1	1	1	1	1	3	2	2	1	1	1
				Early pregnancy	Maternal mental health assessment	Self-rating Anxiety Scale (SAS)	30	2 min	normal	2022-07-23 09:04:20	Finish	1	1	1	1	3	1	1	2	1	1	1	1	4	1	1	2	4	1	1	1
				Early pregnancy	Maternal mental health assessment	Self-rating Anxiety Scale (SAS)	25	2 min	normal	2022-07-23 09:09:22	Finish	1	1	1	1	1	1	1	1	1	2	1	1	1	1	1	2	4	1	1	1
				Early pregnancy	Maternal mental health assessment	Self-rating Anxiety Scale (SAS)	38	3 min	normal	2022-07-23 09:32:43	Finish	1	1	2	1	4	1	1	1	4	1	1	1	4	1	2	2	4	1	4	1
				Early pregnancy	Maternal mental health assessment	Self-rating Anxiety Scale (SAS)	24	2 min	normal	2022-07-23 09:45:45	Finish	1	1	1	1	4	1	1	1	1	1	1	1	1	1	1	2	1	1	1	1
				Early pregnancy	Maternal mental health assessment	Self-rating Anxiety Scale (SAS)	37	2 min	normal	2022-07-23 09:48:35	Finish	1	1	1	1	3	1	2	1	4	1	2	2	4	1	1	2	4	1	3	1
				Early pregnancy	Maternal mental health assessment	Self-rating Anxiety Scale (SAS)	32	2 min	normal	2022-07-23 09:51:40	Finish	1	1	2	1	2	1	2	2	2	1	2	1	4	1	2	2	2	1	1	1
				Early pregnancy	Maternal mental health assessment	Self-rating Anxiety Scale (SAS)	36	2 min	normal	2022-07-23 09:58:05	Finish	1	1	1	1	4	1	1	2	4	1	1	1	4	1	2	3	2	1	3	1
				Early pregnancy	Maternal mental health assessment	Self-rating Anxiety Scale (SAS)	38	2 min	normal	2022-07-23 09:59:00	Finish	2	1	1	1	4	1	2	2	3	1	1	1	1	1	4	3	2	1	4	2
				Early pregnancy	Maternal mental health assessment	Self-rating Anxiety Scale (SAS)	26	2 min	normal	2022-07-23 10:02:22	Finish	1	1	1	1	1	1	1	2	1	2	1	1	2	1	1	3	1	2	1	1
				Early pregnancy	Maternal mental health assessment	Self-rating Anxiety Scale (SAS)	29	2 min	normal	2022-07-23 10:19:06	Finish	1	1	1	1	4	1	1	1	2	2	1	1	1	1	1	2	3	2	1	1
				Early pregnancy	Maternal mental health assessment	Self-rating Anxiety Scale (SAS)	29	2 min	normal	2022-07-23 10:22:31	Finish	1	1	1	1	4	1	2	2	1	1	1	1	4	1	1	2	1	1	1	1
				Early pregnancy	Maternal mental health assessment	Self-rating Anxiety Scale (SAS)	38	2 min	normal	2022-07-23 10:26:59	Finish	2	1	2	1	2	1	2	3	2	2	3	2	2	1	1	3	2	2	2	2
				Early pregnancy	Maternal mental health assessment	Self-rating Anxiety Scale (SAS)	24	2 min	normal	2022-07-23 10:29:37	Finish	1	1	1	1	1	1	1	1	1	1	1	1	1	1	1	3	2	2	1	1
				Early pregnancy	Maternal mental health assessment	Self-rating Anxiety Scale (SAS)	22	2 min	normal	2022-07-23 10:38:05	Finish	1	1	1	1	1	1	1	1	1	1	1	1	1	1	1	2	2	1	1	1
				Early pregnancy	Maternal mental health assessment	Self-rating Anxiety Scale (SAS)	33	2 min	normal	2022-07-23 10:45:40	Finish	1	1	1	1	4	1	1	2	3	1	1	1	2	1	2	3	2	1	3	1
				Mid-pregnancy	Maternal mental health assessment	Self-rating Anxiety Scale (SAS)	25	1 min	normal	2022-07-23 11:11:10	Finish	1	1	1	1	1	1	1	1	1	1	1	1	1	1	1	3	2	2	2	1
				Early pregnancy	Maternal mental health assessment	Self-rating Anxiety Scale (SAS)	21	3 min	normal	2022-07-23 12:31:12	Finish	1	1	1	1	1	1	1	2	1	1	1	1	1	1	1	1	1	1	1	1
				Early pregnancy	Maternal mental health assessment	Self-rating Anxiety Scale (SAS)	35	2 min	normal	2022-07-24 19:54:21	Finish	2	1	1	1	2	1	3	3	2	1	3	1	2	1	2	3	2	1	2	1
				Early pregnancy	Maternal mental health assessment	Self-rating Anxiety Scale (SAS)	34	2 min	normal	2022-07-25 08:42:27	Finish	1	1	1	1	4	1	1	1	4	2	2	1	2	1	1	2	2	1	3	2
				Mid-pregnancy	Maternal mental health assessment	Self-rating Anxiety Scale (SAS)	22	2 min	normal	2022-07-25 08:45:39	Finish	2	1	1	1	1	1	1	1	1	1	1	1	1	1	1	2	1	1	1	1
				3 days after delivery	Maternal mental health assessment	Self-rating Anxiety Scale (SAS)	27	3 min	normal	2022-07-25 09:00:24	Finish	2	1	1	1	4	1	1	1	4	1	1	1	1	1	1	1	1	1	1	1
				Early pregnancy	Maternal mental health assessment	Self-rating Anxiety Scale (SAS)	32	2 min	normal	2022-07-25 09:18:57	Finish	2	2	2	1	2	1	2	2	2	1	2	1	2	1	1	2	2	1	2	1
				Early pregnancy	Maternal mental health assessment	Self-rating Anxiety Scale (SAS)	24	2 min	normal	2022-07-25 09:55:29	Finish	1	1	1	1	1	1	1	1	1	2	1	2	1	1	2	2	1	1	1	1
				Early pregnancy	Maternal mental health assessment	Self-rating Anxiety Scale (SAS)	32	1 min	normal	2022-07-25 09:55:33	Finish	1	1	1	1	4	1	1	1	4	1	1	1	1	1	3	2	1	2	3	1
				Early pregnancy	Maternal mental health assessment	Self-rating Anxiety Scale (SAS)	31	6 min	normal	2022-07-25 10:01:58	Finish	2	1	2	1	1	1	2	2	1	2	2	1	1	2	2	2	1	1	2	2
				Early pregnancy	Maternal mental health assessment	Self-rating Anxiety Scale (SAS)	34	2 min	normal	2022-07-25 10:02:22	Finish	1	2	2	1	2	1	1	3	2	1	1	1	2	1	3	2	2	1	3	2
				Early pregnancy	Maternal mental health assessment	Self-rating Anxiety Scale (SAS)	28	2 min	normal	2022-07-25 10:07:08	Finish	1	1	1	1	4	1	1	2	4	1	1	1	1	1	1	2	1	1	1	1
				Early pregnancy	Maternal mental health assessment	Self-rating Anxiety Scale (SAS)	29	1 min	normal	2022-07-25 10:07:11	Finish	1	1	1	1	4	1	1	1	4	1	1	1	4	1	1	1	1	1	1	1
				Early pregnancy	Maternal mental health assessment	Self-rating Anxiety Scale (SAS)	25	1 min	normal	2022-07-25 10:19:00	Finish	1	1	1	1	1	1	2	2	1	1	1	1	1	1	2	2	1	1	2	1
				3 days after delivery	Maternal mental health assessment	Self-rating Anxiety Scale (SAS)	38	1 min	normal	2022-07-25 10:28:49	Finish	2	2	2	2	3	1	1	1	1	1	2	2	4	2	2	2	3	2	1	2
				Early pregnancy	Maternal mental health assessment	Self-rating Anxiety Scale (SAS)	24	2 min	normal	2022-07-25 10:56:01	Finish	1	1	1	1	1	1	1	1	2	1	1	1	1	1	2	2	1	1	2	1
				Early pregnancy	Maternal mental health assessment	Self-rating Anxiety Scale (SAS)	27	2 min	normal	2022-07-25 11:24:01	Finish	1	1	1	1	3	1	1	1	2	1	1	1	1	1	1	2	3	1	2	1
				Late pregnancy	Maternal mental health assessment	Self-rating Anxiety Scale (SAS)	28	12 min	normal	2022-07-25 14:07:06	Finish	1	1	1	1	4	1	1	1	4	1	1	1	1	1	1	2	1	1	2	1
				Early pregnancy	Maternal mental health assessment	Self-rating Anxiety Scale (SAS)	35	2 min	normal	2022-07-25 14:33:44	Finish	1	1	1	1	4	1	2	1	3	1	1	1	3	1	1	2	4	1	3	2
				Early pregnancy	Maternal mental health assessment	Self-rating Anxiety Scale (SAS)	26	4 min	normal	2022-07-25 14:34:17	Finish	1	1	1	1	1	1	1	2	1	1	1	1	3	1	1	3	2	1	1	1
				Early pregnancy	Maternal mental health assessment	Self-rating Anxiety Scale (SAS)	26	14 min	normal	2022-07-25 16:55:32	Finish	1	1	1	1	1	1	1	2	3	1	1	1	1	1	1	2	2	1	2	1
				Early pregnancy	Maternal mental health assessment	Self-rating Anxiety Scale (SAS)	39	2 min	normal	2022-07-26 08:17:06	Finish	1	1	1	1	4	1	2	2	4	1	1	1	4	1	2	2	4	1	4	1
				Early pregnancy	Maternal mental health assessment	Self-rating Anxiety Scale (SAS)	24	3 min	normal	2022-07-26 08:42:54	Finish	1	1	1	1	1	1	1	2	1	1	1	1	1	1	2	3	1	1	1	1
				Early pregnancy	Maternal mental health assessment	Self-rating Anxiety Scale (SAS)	27	2 min	normal	2022-07-26 09:04:30	Finish	2	2	2	1	1	1	1	2	1	1	1	1	2	1	1	2	1	1	2	1
				Early pregnancy	Maternal mental health assessment	Self-rating Anxiety Scale (SAS)	29	2 min	normal	2022-07-26 09:09:17	Finish	1	1	2	1	1	1	1	3	2	1	1	1	4	1	1	1	2	1	2	1
				3 days after delivery	Maternal mental health assessment	Self-rating Anxiety Scale (SAS)	28	2 min	normal	2022-07-26 09:13:34	Finish	1	1	1	1	4	1	2	1	2	1	1	1	1	1	1	3	2	1	1	1
				3 days after delivery	Maternal mental health assessment	Self-rating Anxiety Scale (SAS)	22	2 min	normal	2022-07-26 09:13:35	Finish	1	1	1	1	1	1	1	2	1	2	1	1	1	1	1	1	1	1	1	1
				Early pregnancy	Maternal mental health assessment	Self-rating Anxiety Scale (SAS)	36	2 min	normal	2022-07-26 09:27:37	Finish	1	1	1	1	1	1	3	3	2	1	3	1	2	1	3	2	3	1	3	2
				Early pregnancy	Maternal mental health assessment	Self-rating Anxiety Scale (SAS)	25	2 min	normal	2022-07-26 09:31:16	Finish	1	1	1	1	1	1	2	1	1	1	2	1	1	1	2	1	1	2	1	2
				Early pregnancy	Maternal mental health assessment	Self-rating Anxiety Scale (SAS)	26	2 min	normal	2022-07-26 09:34:00	Finish	1	1	1	1	3	1	1	1	1	1	1	1	4	1	1	1	2	1	1	1
				3 days after delivery	Maternal mental health assessment	Self-rating Anxiety Scale (SAS)	32	2 min	normal	2022-07-26 09:38:40	Finish	1	1	1	1	4	1	1	1	4	1	1	1	4	1	1	1	2	2	2	1
				3 days after delivery	Maternal mental health assessment	Self-rating Anxiety Scale (SAS)	30	2 min	normal	2022-07-26 09:42:26	Finish	2	1	1	1	2	1	2	2	2	1	1	1	2	1	1	2	2	1	3	1
				Early pregnancy	Maternal mental health assessment	Self-rating Anxiety Scale (SAS)	24	10 min	normal	2022-07-26 09:44:02	Finish	1	1	1	1	1	1	1	2	2	1	1	1	1	1	1	2	1	1	2	1
				Early pregnancy	Maternal mental health assessment	Self-rating Anxiety Scale (SAS)	31	1 min	normal	2022-07-26 09:45:56	Finish	1	1	1	1	4	1	1	1	2	1	1	1	4	1	1	1	4	1	2	1
				Early pregnancy	Maternal mental health assessment	Self-rating Anxiety Scale (SAS)	35	1 min	normal	2022-07-26 09:48:38	Finish	1	1	1	1	4	1	1	1	4	1	1	1	4	1	1	1	4	1	4	1
				Early pregnancy	Maternal mental health assessment	Self-rating Anxiety Scale (SAS)	31	3 min	normal	2022-07-26 09:56:58	Finish	1	1	1	1	4	1	1	1	2	1	1	1	1	1	2	3	2	1	2	3
				Early pregnancy	Maternal mental health assessment	Self-rating Anxiety Scale (SAS)	26	2 min	normal	2022-07-26 09:57:23	Finish	1	1	1	1	2	1	1	1	2	1	1	1	2	1	1	2	2	1	2	1
				3 days after delivery	Maternal mental health assessment	Self-rating Anxiety Scale (SAS)	33	1 min	normal	2022-07-26 10:03:32	Finish	1	1	1	1	2	1	1	1	4	1	1	1	4	1	1	3	3	2	2	1
				3 days after delivery	Maternal mental health assessment	Self-rating Anxiety Scale (SAS)	36	3 min	normal	2022-07-26 10:09:58	Finish	3	1	2	1	2	1	2	2	3	2	1	1	1	2	1	3	1	3	3	1
				Early pregnancy	Maternal mental health assessment	Self-rating Anxiety Scale (SAS)	33	1 min	normal	2022-07-26 10:14:02	Finish	1	1	1	1	4	1	1	1	4	1	1	1	4	1	1	1	4	1	2	1
				Early pregnancy	Maternal mental health assessment	Self-rating Anxiety Scale (SAS)	33	5 min	normal	2022-07-26 10:21:12	Finish	1	1	2	1	4	1	1	1	2	2	1	1	2	1	1	2	3	2	2	2
				Early pregnancy	Maternal mental health assessment	Self-rating Anxiety Scale (SAS)	20	1 min	normal	2022-07-26 11:04:18	Finish	1	1	1	1	1	1	1	1	1	1	1	1	1	1	1	1	1	1	1	1
				Early pregnancy	Maternal mental health assessment	Self-rating Anxiety Scale (SAS)	37	2 min	normal	2022-07-26 11:32:23	Finish	1	1	1	1	4	2	2	2	2	2	1	3	3	1	3	1	4	1	1	1
				Early pregnancy	Maternal mental health assessment	Self-rating Anxiety Scale (SAS)	29	2 min	normal	2022-07-26 11:38:41	Finish	1	1	1	1	2	1	1	1	2	2	1	1	2	1	2	3	2	1	2	1
				Early pregnancy	Maternal mental health assessment	Self-rating Anxiety Scale (SAS)	34	10 min	normal	2022-07-27 08:04:26	Finish	2	2	2	1	3	1	1	1	2	1	1	1	4	1	1	2	2	2	2	2
				Early pregnancy	Maternal mental health assessment	Self-rating Anxiety Scale (SAS)	34	4 min	normal	2022-07-27 08:43:49	Finish	1	1	2	1	4	1	1	2	2	1	1	1	1	1	2	2	4	1	3	2
				Mid-pregnancy	Maternal mental health assessment	Self-rating Anxiety Scale (SAS)	34	1 min	normal	2022-07-27 09:02:41	Finish	1	1	1	1	4	1	1	1	2	1	1	1	4	2	1	3	3	1	3	1
				Early pregnancy	Maternal mental health assessment	Self-rating Anxiety Scale (SAS)	23	6 min	normal	2022-07-27 09:11:54	Finish	2	1	1	1	1	1	1	1	1	1	1	1	1	1	1	3	1	1	1	1
				Early pregnancy	Maternal mental health assessment	Self-rating Anxiety Scale (SAS)	23	2 min	normal	2022-07-27 09:16:35	Finish	2	1	1	1	1	1	1	1	1	1	1	1	1	1	2	2	1	1	1	1
				3 days after delivery	Maternal mental health assessment	Self-rating Anxiety Scale (SAS)	22	2 min	normal	2022-07-27 09:21:01	Finish	1	1	1	1	1	1	1	1	1	1	1	1	1	1	1	2	1	1	2	1
				Early pregnancy	Maternal mental health assessment	Self-rating Anxiety Scale (SAS)	40	2 min	normal	2022-07-27 09:23:27	Finish	1	1	1	1	4	1	3	3	1	2	3	2	1	2	3	4	1	1	3	2
				3 days after delivery	Maternal mental health assessment	Self-rating Anxiety Scale (SAS)	26	2 min	normal	2022-07-27 09:25:38	Finish	1	1	1	1	2	1	2	2	2	2	1	1	1	1	1	1	2	1	1	1
				3 days after delivery	Maternal mental health assessment	Self-rating Anxiety Scale (SAS)	31	2 min	normal	2022-07-27 09:27:38	Finish	1	1	2	2	3	1	1	1	3	1	1	2	2	1	1	1	1	1	3	2
				Early pregnancy	Maternal mental health assessment	Self-rating Anxiety Scale (SAS)	22	12 min	normal	2022-07-27 09:33:01	Finish	1	1	1	1	1	1	1	1	1	1	1	1	1	1	1	2	1	1	2	1
				Early pregnancy	Maternal mental health assessment	Self-rating Anxiety Scale (SAS)	38	2 min	normal	2022-07-27 09:33:40	Finish	2	2	2	2	4	1	1	3	1	2	1	2	2	1	2	2	3	1	2	2
				Early pregnancy	Maternal mental health assessment	Self-rating Anxiety Scale (SAS)	33	6 min	normal	2022-07-27 09:36:46	Finish	2	1	3	1	1	1	1	3	3	2	2	1	1	1	3	2	1	1	2	1
				3 days after delivery	Maternal mental health assessment	Self-rating Anxiety Scale (SAS)	30	4 min	normal	2022-07-27 09:40:33	Finish	1	1	1	2	4	1	1	1	3	2	1	1	1	1	1	2	2	1	2	1
				Early pregnancy	Maternal mental health assessment	Self-rating Anxiety Scale (SAS)	27	2 min	normal	2022-07-27 09:42:30	Finish	1	1	1	1	1	1	1	2	2	1	1	1	1	1	1	3	3	1	2	1
				Early pregnancy	Maternal mental health assessment	Self-rating Anxiety Scale (SAS)	27	2 min	normal	2022-07-27 09:54:45	Finish	2	1	1	1	1	1	1	2	1	1	1	2	1	1	2	2	1	1	2	2
				Early pregnancy	Maternal mental health assessment	Self-rating Anxiety Scale (SAS)	29	2 min	normal	2022-07-27 10:02:05	Finish	1	1	1	1	1	1	1	3	1	1	1	3	3	1	3	1	1	1	2	1
				Late pregnancy	Maternal mental health assessment	Self-rating Anxiety Scale (SAS)	38	3 min	normal	2022-07-27 10:06:09	Finish	1	1	1	1	4	1	1	2	4	1	2	2	2	2	2	2	2	2	3	2
				Mid-pregnancy	Maternal mental health assessment	Self-rating Anxiety Scale (SAS)	23	3 min	normal	2022-07-27 10:46:55	Finish	1	1	1	1	1	1	1	1	1	1	1	1	1	1	1	2	2	1	2	1
				Early pregnancy	Maternal mental health assessment	Self-rating Anxiety Scale (SAS)	33	4 min	normal	2022-07-27 11:05:54	Finish	1	1	1	1	3	1	1	2	2	2	1	1	4	1	2	2	2	2	2	1
				Mid-pregnancy	Maternal mental health assessment	Self-rating Anxiety Scale (SAS)	33	2 min	normal	2022-07-27 11:23:26	Finish	1	1	1	1	4	1	1	2	1	2	1	1	4	1	1	2	4	1	1	2
				Early pregnancy	Maternal mental health assessment	Self-rating Anxiety Scale (SAS)	36	2 min	normal	2022-07-27 12:17:15	Finish	2	1	1	1	4	1	1	2	3	1	1	1	3	1	1	3	4	1	3	1
				Early pregnancy	Maternal mental health assessment	Self-rating Anxiety Scale (SAS)	50	3 min	mild	2022-07-27 13:51:52	Finish	4	4	2	2	4	1	2	2	3	3	2	2	4	1	1	3	3	1	4	2
				3 days after delivery	Maternal mental health assessment	Self-rating Anxiety Scale (SAS)	29	3 min	normal	2022-07-27 14:46:12	Finish	2	2	2	1	2	1	1	1	2	2	1	1	2	1	1	1	2	1	2	1
				Early pregnancy	Maternal mental health assessment	Self-rating Anxiety Scale (SAS)	30	2 min	normal	2022-07-28 09:02:55	Finish	1	1	1	1	1	1	2	2	1	1	1	1	4	1	2	3	2	1	1	2
				3 days after delivery	Maternal mental health assessment	Self-rating Anxiety Scale (SAS)	27	3 min	normal	2022-07-28 09:07:21	Finish	1	1	1	1	2	1	1	1	2	1	1	1	1	1	1	3	2	1	3	1
				Early pregnancy	Maternal mental health assessment	Self-rating Anxiety Scale (SAS)	37	2 min	normal	2022-07-28 09:12:58	Finish	1	1	2	1	4	1	2	2	4	2	2	1	2	1	3	2	1	1	3	1
				Early pregnancy	Maternal mental health assessment	Self-rating Anxiety Scale (SAS)	24	2 min	normal	2022-07-28 09:17:08	Finish	1	1	1	1	1	1	1	1	1	1	1	1	4	1	1	2	1	1	1	1
				Early pregnancy	Maternal mental health assessment	Self-rating Anxiety Scale (SAS)	35	1 min	normal	2022-07-28 09:34:42	Finish	1	1	1	1	4	1	1	1	4	1	1	1	4	1	1	1	4	1	4	1
				Early pregnancy	Maternal mental health assessment	Self-rating Anxiety Scale (SAS)	39	3 min	normal	2022-07-28 09:35:37	Finish	2	2	2	2	3	1	3	4	2	2	2	2	2	1	2	2	1	2	1	1
				Early pregnancy	Maternal mental health assessment	Self-rating Anxiety Scale (SAS)	22	3 min	normal	2022-07-28 09:39:28	Finish	1	1	1	1	1	1	1	2	1	1	1	1	1	1	1	2	1	1	1	1
				Early pregnancy	Maternal mental health assessment	Self-rating Anxiety Scale (SAS)	32	2 min	normal	2022-07-28 09:43:44	Finish	1	1	1	1	1	1	1	3	2	1	1	1	4	1	2	3	2	1	2	2
				Early pregnancy	Maternal mental health assessment	Self-rating Anxiety Scale (SAS)	28	2 min	normal	2022-07-28 09:46:53	Finish	1	1	1	1	4	1	1	1	2	1	1	1	1	1	2	2	1	1	2	2
				Early pregnancy	Maternal mental health assessment	Self-rating Anxiety Scale (SAS)	29	2 min	normal	2022-07-28 09:48:34	Finish	1	1	1	1	4	1	1	2	4	1	1	1	2	1	1	1	1	1	2	1
				Early pregnancy	Maternal mental health assessment	Self-rating Anxiety Scale (SAS)	37	2 min	normal	2022-07-28 09:56:24	Finish	2	2	2	2	3	1	1	1	3	2	2	1	3	1	1	2	1	2	2	3
				Early pregnancy	Maternal mental health assessment	Self-rating Anxiety Scale (SAS)	24	2 min	normal	2022-07-28 10:13:42	Finish	1	1	1	1	1	1	1	1	4	1	1	1	1	1	1	2	1	1	1	1
				3 days after delivery	Maternal mental health assessment	Self-rating Anxiety Scale (SAS)	37	2 min	normal	2022-07-28 10:21:48	Finish	2	2	2	1	2	1	1	2	2	2	2	2	2	1	2	3	2	2	3	1
				3 days after delivery	Maternal mental health assessment	Self-rating Anxiety Scale (SAS)	21	2 min	normal	2022-07-28 10:24:19	Finish	1	1	1	1	1	1	1	1	1	1	1	1	1	1	1	2	1	1	1	1
				3 days after delivery	Maternal mental health assessment	Self-rating Anxiety Scale (SAS)	24	3 min	normal	2022-07-28 10:26:42	Finish	1	1	1	1	1	1	1	1	4	1	1	1	1	1	1	1	1	1	2	1
				Mid-pregnancy	Maternal mental health assessment	Self-rating Anxiety Scale (SAS)	29	3 min	normal	2022-07-28 10:28:07	Finish	1	1	1	1	4	1	1	1	1	2	1	1	1	1	1	4	2	1	2	1
				Early pregnancy	Maternal mental health assessment	Self-rating Anxiety Scale (SAS)	26	3 min	normal	2022-07-28 10:36:37	Finish	1	1	1	1	1	1	1	2	2	2	1	1	1	1	2	3	1	1	1	1
				Early pregnancy	Maternal mental health assessment	Self-rating Anxiety Scale (SAS)	31	4 min	normal	2022-07-28 10:47:37	Finish	1	1	2	1	4	1	1	2	2	1	1	1	4	1	1	1	2	1	2	1
				Early pregnancy	Maternal mental health assessment	Self-rating Anxiety Scale (SAS)	28	3 min	normal	2022-07-28 10:47:46	Finish	1	1	1	1	4	1	1	1	2	1	1	1	1	1	2	3	1	1	1	2
				Late pregnancy	Maternal mental health assessment	Self-rating Anxiety Scale (SAS)	38	3 min	normal	2022-07-28 10:56:15	Finish	1	1	2	1	3	1	2	2	3	1	1	1	2	1	3	3	3	1	4	2
				Early pregnancy	Maternal mental health assessment	Self-rating Anxiety Scale (SAS)	35	2 min	normal	2022-07-28 10:57:02	Finish	3	1	2	1	1	1	1	3	2	2	3	2	1	1	2	2	2	2	2	1
				Early pregnancy	Maternal mental health assessment	Self-rating Anxiety Scale (SAS)	23	2 min	normal	2022-07-28 10:58:30	Finish	1	1	1	1	4	1	1	1	1	1	1	1	1	1	1	1	1	1	1	1
				Early pregnancy	Maternal mental health assessment	Self-rating Anxiety Scale (SAS)	28	3 min	normal	2022-07-28 11:27:54	Finish	1	1	1	1	1	1	1	3	2	1	1	1	1	1	2	2	2	1	3	1
				Early pregnancy	Maternal mental health assessment	Self-rating Anxiety Scale (SAS)	31	1 min	normal	2022-07-28 11:31:48	Finish	1	1	1	1	4	1	1	1	4	1	1	1	1	1	1	1	4	1	3	1
				Early pregnancy	Maternal mental health assessment	Self-rating Anxiety Scale (SAS)	31	2 min	normal	2022-07-28 11:33:07	Finish	2	1	2	1	3	1	1	3	2	1	1	1	2	1	1	2	2	1	2	1
				Mid-pregnancy	Maternal mental health assessment	Self-rating Anxiety Scale (SAS)	39	4 min	normal	2022-07-28 11:52:34	Finish	2	2	2	2	4	2	1	2	4	2	1	1	2	2	2	2	1	1	2	2
				Early pregnancy	Maternal mental health assessment	Self-rating Anxiety Scale (SAS)	38	2 min	normal	2022-07-28 11:58:46	Finish	2	2	2	2	3	1	1	3	2	2	2	2	1	1	3	2	1	2	2	2
				3 days after delivery	Maternal mental health assessment	Self-rating Anxiety Scale (SAS)	30	3 min	normal	2022-07-28 12:24:09	Finish	1	1	1	1	1	1	2	2	1	2	1	1	2	1	1	3	3	1	3	1
				Early pregnancy	Maternal mental health assessment	Self-rating Anxiety Scale (SAS)	37	2 min	normal	2022-07-28 13:18:22	Finish	1	1	1	1	4	1	1	3	3	2	3	2	1	2	1	2	1	3	3	1
				Early pregnancy	Maternal mental health assessment	Self-rating Anxiety Scale (SAS)	26	2 min	normal	2022-07-28 13:48:14	Finish	1	1	1	1	4	1	1	1	1	1	1	1	4	1	1	1	1	1	1	1
				3 days after delivery	Maternal mental health assessment	Self-rating Anxiety Scale (SAS)	20	2 min	normal	2022-07-28 14:07:27	Finish	1	1	1	1	1	1	1	1	1	1	1	1	1	1	1	1	1	1	1	1
				3 days after delivery	Maternal mental health assessment	Self-rating Anxiety Scale (SAS)	35	2 min	normal	2022-07-28 16:24:48	Finish	2	1	1	2	2	1	2	2	4	1	1	2	1	1	1	3	1	3	3	1
				Early pregnancy	Maternal mental health assessment	Self-rating Anxiety Scale (SAS)	30	1 min	normal	2022-07-29 08:44:46	Finish	1	1	1	1	2	1	1	2	2	1	2	1	4	1	1	1	4	1	1	1
				Early pregnancy	Maternal mental health assessment	Self-rating Anxiety Scale (SAS)	37	1 min	normal	2022-07-29 08:53:15	Finish	1	1	1	1	4	1	1	1	2	3	1	1	4	1	2	3	2	2	3	2
				Early pregnancy	Maternal mental health assessment	Self-rating Anxiety Scale (SAS)	34	2 min	normal	2022-07-29 09:01:51	Finish	2	2	2	1	4	1	1	1	1	2	1	1	2	1	1	4	1	2	1	3
				Mid-pregnancy	Maternal mental health assessment	Self-rating Anxiety Scale (SAS)	22	1 min	normal	2022-07-29 09:02:56	Finish	1	1	1	1	1	1	1	1	1	2	1	1	1	1	1	2	1	1	1	1
				Early pregnancy	Maternal mental health assessment	Self-rating Anxiety Scale (SAS)	25	2 min	normal	2022-07-29 09:04:42	Finish	2	1	1	1	3	1	1	1	1	1	1	2	1	1	2	1	1	1	1	1
				Early pregnancy	Maternal mental health assessment	Self-rating Anxiety Scale (SAS)	22	2 min	normal	2022-07-29 09:06:41	Finish	1	1	1	1	1	1	1	1	1	1	1	1	1	1	1	3	1	1	1	1
				Early pregnancy	Maternal mental health assessment	Self-rating Anxiety Scale (SAS)	31	66 min	normal	2022-07-29 09:08:10	Finish	2	1	1	1	4	1	2	2	4	1	2	1	1	1	1	2	1	1	1	1
				Early pregnancy	Maternal mental health assessment	Self-rating Anxiety Scale (SAS)	36	4 min	normal	2022-07-29 09:11:29	Finish	1	1	1	1	4	1	1	1	2	1	1	3	4	1	2	3	2	1	2	3
				Early pregnancy	Maternal mental health assessment	Self-rating Anxiety Scale (SAS)	29	3 min	normal	2022-07-29 09:20:58	Finish	1	1	1	1	2	1	1	3	2	1	1	1	1	1	2	2	3	1	2	1
				3 days after delivery	Maternal mental health assessment	Self-rating Anxiety Scale (SAS)	26	2 min	normal	2022-07-29 09:26:35	Finish	1	1	1	1	2	1	1	2	2	1	1	1	1	1	1	2	2	1	2	1
				Early pregnancy	Maternal mental health assessment	Self-rating Anxiety Scale (SAS)	31	2 min	normal	2022-07-29 09:32:38	Finish	1	1	1	1	1	1	1	2	1	1	2	2	1	1	3	3	2	1	2	3
				Early pregnancy	Maternal mental health assessment	Self-rating Anxiety Scale (SAS)	36	4 min	normal	2022-07-29 09:35:18	Finish	2	1	1	1	1	2	2	3	1	2	2	3	2	2	1	2	2	2	2	2
				Early pregnancy	Maternal mental health assessment	Self-rating Anxiety Scale (SAS)	34	10 min	normal	2022-07-29 09:37:08	Finish	1	1	2	1	2	1	2	3	3	1	2	1	1	1	2	3	2	2	2	1
				Early pregnancy	Maternal mental health assessment	Self-rating Anxiety Scale (SAS)	25	32 min	normal	2022-07-29 09:43:23	Finish	1	1	1	1	4	1	1	1	2	1	1	1	1	1	1	2	1	1	1	1
				Early pregnancy	Maternal mental health assessment	Self-rating Anxiety Scale (SAS)	24	2 min	normal	2022-07-29 09:48:57	Finish	1	1	1	1	1	1	1	1	1	1	1	1	4	1	1	1	1	1	1	2
				Early pregnancy	Maternal mental health assessment	Self-rating Anxiety Scale (SAS)	30	2 min	normal	2022-07-29 09:51:50	Finish	2	1	1	1	3	1	1	2	2	1	2	1	1	1	1	3	2	1	2	1
				Early pregnancy	Maternal mental health assessment	Self-rating Anxiety Scale (SAS)	32	2 min	normal	2022-07-29 09:53:03	Finish	1	1	1	1	3	1	1	2	3	1	2	1	2	1	3	1	2	1	3	1
				Early pregnancy	Maternal mental health assessment	Self-rating Anxiety Scale (SAS)	32	2 min	normal	2022-07-29 10:06:14	Finish	2	2	2	1	1	1	1	2	2	1	1	2	2	1	2	3	2	1	2	1
				3 days after delivery	Maternal mental health assessment	Self-rating Anxiety Scale (SAS)	28	6 min	normal	2022-07-29 10:06:43	Finish	2	1	1	1	1	1	2	3	1	1	1	1	1	1	1	3	1	2	2	1
				Early pregnancy	Maternal mental health assessment	Self-rating Anxiety Scale (SAS)	28	3 min	normal	2022-07-29 10:08:40	Finish	2	1	1	1	4	1	1	2	2	1	1	1	1	1	1	2	1	2	1	1
				Early pregnancy	Maternal mental health assessment	Self-rating Anxiety Scale (SAS)	35	1 min	normal	2022-07-29 10:09:04	Finish	1	1	1	1	4	1	1	1	4	1	1	1	4	1	1	1	4	1	4	1
				Early pregnancy	Maternal mental health assessment	Self-rating Anxiety Scale (SAS)	23	1 min	normal	2022-07-29 10:34:02	Finish	1	1	1	1	1	1	1	1	1	1	1	1	1	1	1	2	1	2	2	1
				Early pregnancy	Maternal mental health assessment	Self-rating Anxiety Scale (SAS)	23	3 min	normal	2022-07-29 10:40:33	Finish	1	1	1	1	1	1	1	1	2	1	1	1	1	1	1	2	1	1	2	1
				3 days after delivery	Maternal mental health assessment	Self-rating Anxiety Scale (SAS)	28	2 min	normal	2022-07-29 10:43:55	Finish	2	1	1	1	2	1	1	1	2	1	1	1	1	1	1	3	2	1	3	1
				Early pregnancy	Maternal mental health assessment	Self-rating Anxiety Scale (SAS)	46	14 min	mild	2022-07-29 10:47:36	Finish	2	2	2	2	3	2	2	3	3	2	2	2	3	2	1	3	3	2	3	2
				3 days after delivery	Maternal mental health assessment	Self-rating Anxiety Scale (SAS)	34	1 min	normal	2022-07-29 10:56:29	Finish	1	1	1	1	1	1	1	3	2	2	3	2	3	1	1	3	2	1	2	2
				3 days after delivery	Maternal mental health assessment	Self-rating Anxiety Scale (SAS)	30	2 min	normal	2022-07-29 10:57:10	Finish	1	1	1	1	4	1	1	1	4	1	1	1	4	1	1	2	1	1	1	1
				3 days after delivery	Maternal mental health assessment	Self-rating Anxiety Scale (SAS)	22	2 min	normal	2022-07-29 11:01:28	Finish	1	1	1	1	1	1	1	1	1	1	1	1	1	1	1	2	1	1	2	1
				Early pregnancy	Maternal mental health assessment	Self-rating Anxiety Scale (SAS)	29	3 min	normal	2022-07-29 11:04:07	Finish	1	1	1	1	2	1	1	2	2	1	1	1	4	1	1	2	2	1	2	1
				Early pregnancy	Maternal mental health assessment	Self-rating Anxiety Scale (SAS)	43	3 min	mild	2022-07-29 11:06:05	Finish	3	2	2	2	3	2	1	2	4	2	1	1	3	2	1	3	3	2	2	2
				Early pregnancy	Maternal mental health assessment	Self-rating Anxiety Scale (SAS)	30	2 min	normal	2022-07-29 11:10:52	Finish	1	1	1	1	1	1	1	2	1	1	1	1	4	1	2	3	2	2	1	2
				Mid-pregnancy	Maternal mental health assessment	Self-rating Anxiety Scale (SAS)	31	2 min	normal	2022-07-29 11:11:09	Finish	1	2	2	1	2	1	2	2	2	1	1	1	2	1	1	2	2	1	2	2
				Early pregnancy	Maternal mental health assessment	Self-rating Anxiety Scale (SAS)	40	3 min	normal	2022-07-29 11:15:09	Finish	2	2	2	1	4	2	2	3	2	1	2	1	2	1	1	1	4	1	3	3
				Early pregnancy	Maternal mental health assessment	Self-rating Anxiety Scale (SAS)	30	1 min	normal	2022-07-29 11:16:48	Finish	1	1	1	1	1	1	2	2	2	2	2	2	2	1	1	2	1	1	3	1
				Early pregnancy	Maternal mental health assessment	Self-rating Anxiety Scale (SAS)	37	3 min	normal	2022-07-29 11:17:28	Finish	2	2	2	1	2	1	2	2	2	2	2	2	2	1	1	3	3	2	2	1
				Early pregnancy	Maternal mental health assessment	Self-rating Anxiety Scale (SAS)	36	3 min	normal	2022-07-29 11:36:16	Finish	2	2	2	1	1	1	1	1	2	2	2	1	3	1	2	3	3	2	3	1
				Early pregnancy	Maternal mental health assessment	Self-rating Anxiety Scale (SAS)	31	3 min	normal	2022-07-29 11:54:00	Finish	1	1	1	1	4	1	2	2	2	1	2	1	1	1	2	2	1	1	3	1
				Early pregnancy	Maternal mental health assessment	Self-rating Anxiety Scale (SAS)	38	1 min	normal	2022-07-29 11:58:37	Finish	1	1	1	1	4	1	1	1	4	2	2	2	4	1	1	2	4	1	2	2
				Early pregnancy	Maternal mental health assessment	Self-rating Anxiety Scale (SAS)	42	1 min	normal	2022-07-29 11:59:33	Finish	2	1	2	1	4	1	2	3	1	4	2	3	1	1	1	4	4	2	1	2
				Early pregnancy	Maternal mental health assessment	Self-rating Anxiety Scale (SAS)	27	6 min	normal	2022-07-29 13:49:51	Finish	1	1	1	1	4	1	1	1	1	2	2	1	1	1	2	2	1	1	1	1
				Early pregnancy	Maternal mental health assessment	Self-rating Anxiety Scale (SAS)	25	3 min	normal	2022-07-29 14:05:00	Finish	1	1	1	1	1	1	1	1	1	1	1	1	2	1	1	3	2	1	2	1
				Early pregnancy	Maternal mental health assessment	Self-rating Anxiety Scale (SAS)	28	5 min	normal	2022-07-29 14:29:02	Finish	2	1	1	1	1	1	2	2	1	2	1	1	1	1	1	2	2	2	2	1
				Early pregnancy	Maternal mental health assessment	Self-rating Anxiety Scale (SAS)	33	2 min	normal	2022-07-29 15:05:47	Finish	1	1	1	1	4	1	1	1	4	2	1	1	2	1	2	3	2	1	2	1
				Early pregnancy	Maternal mental health assessment	Self-rating Anxiety Scale (SAS)	26	2 min	normal	2022-07-29 15:38:39	Finish	1	1	1	1	1	1	1	2	2	1	1	1	1	1	2	2	1	1	3	1
				Early pregnancy	Maternal mental health assessment	Self-rating Anxiety Scale (SAS)	31	3 min	normal	2022-07-29 15:39:18	Finish	2	1	2	1	2	1	1	1	1	2	1	1	1	1	1	2	4	2	2	2
				Late pregnancy	Maternal mental health assessment	Self-rating Anxiety Scale (SAS)	30	1 min	normal	2022-07-29 16:07:07	Finish	1	1	1	1	4	1	1	1	4	1	1	1	4	1	1	2	1	1	1	1
				Early pregnancy	Maternal mental health assessment	Self-rating Anxiety Scale (SAS)	32	3 min	normal	2022-07-29 16:30:13	Finish	1	1	1	1	4	1	1	1	1	1	1	1	1	4	1	1	4	1	1	4
				Mid-pregnancy	Maternal mental health assessment	Self-rating Anxiety Scale (SAS)	31	2 min	normal	2022-07-29 18:34:00	Finish	1	1	1	1	4	1	1	2	2	1	1	1	4	1	1	1	2	2	2	1
				Early pregnancy	Maternal mental health assessment	Self-rating Anxiety Scale (SAS)	32	2 min	normal	2022-07-30 07:48:02	Finish	1	1	1	1	4	1	1	2	2	1	1	1	4	1	2	3	1	1	2	1
				3 days after delivery	Maternal mental health assessment	Self-rating Anxiety Scale (SAS)	23	2 min	normal	2022-07-30 07:51:35	Finish	1	1	1	1	2	1	1	1	1	1	1	1	1	1	1	1	1	1	3	1
				Early pregnancy	Maternal mental health assessment	Self-rating Anxiety Scale (SAS)	37	1 min	normal	2022-07-30 08:04:12	Finish	1	1	1	1	4	1	1	1	4	1	1	1	4	1	1	3	4	1	4	1
				Early pregnancy	Maternal mental health assessment	Self-rating Anxiety Scale (SAS)	29	2 min	normal	2022-07-30 08:08:11	Finish	1	1	1	1	4	1	1	1	2	2	1	1	1	1	1	2	2	1	2	2
				Early pregnancy	Maternal mental health assessment	Self-rating Anxiety Scale (SAS)	41	2 min	normal	2022-07-30 08:12:21	Finish	1	1	1	2	4	2	2	2	3	2	4	1	4	1	2	2	3	1	1	2
				Early pregnancy	Maternal mental health assessment	Self-rating Anxiety Scale (SAS)	24	1 min	normal	2022-07-30 08:12:35	Finish	1	1	1	1	1	1	1	1	2	1	1	1	1	1	1	2	2	2	1	1
				Early pregnancy	Maternal mental health assessment	Self-rating Anxiety Scale (SAS)	26	2 min	normal	2022-07-30 08:13:32	Finish	1	1	1	1	1	1	1	1	1	1	2	1	1	1	1	2	3	2	2	1
				Early pregnancy	Maternal mental health assessment	Self-rating Anxiety Scale (SAS)	37	2 min	normal	2022-07-30 08:18:51	Finish	2	2	2	1	3	1	2	3	3	1	1	1	1	1	2	3	2	1	3	2
				Early pregnancy	Maternal mental health assessment	Self-rating Anxiety Scale (SAS)	34	2 min	normal	2022-07-30 08:33:40	Finish	2	1	1	1	4	1	1	1	4	1	1	1	2	1	1	3	3	1	3	1
				Early pregnancy	Maternal mental health assessment	Self-rating Anxiety Scale (SAS)	39	1 min	normal	2022-07-30 08:59:45	Finish	2	2	2	1	3	1	2	2	3	2	3	1	4	1	1	1	3	2	2	1
				Early pregnancy	Maternal mental health assessment	Self-rating Anxiety Scale (SAS)	36	2 min	normal	2022-07-30 09:02:49	Finish	1	2	2	1	2	1	1	1	2	1	1	2	3	2	2	3	2	2	3	2
				Early pregnancy	Maternal mental health assessment	Self-rating Anxiety Scale (SAS)	42	2 min	normal	2022-07-30 09:04:15	Finish	3	2	2	2	3	1	3	3	2	2	2	2	1	1	1	3	2	3	3	1
				Early pregnancy	Maternal mental health assessment	Self-rating Anxiety Scale (SAS)	30	3 min	normal	2022-07-30 09:09:48	Finish	2	2	1	1	1	1	1	1	1	1	1	1	2	1	3	3	2	1	3	1
				Early pregnancy	Maternal mental health assessment	Self-rating Anxiety Scale (SAS)	35	2 min	normal	2022-07-30 09:15:50	Finish	1	1	1	1	4	1	1	1	4	2	1	1	4	1	1	3	4	1	1	1
				Early pregnancy	Maternal mental health assessment	Self-rating Anxiety Scale (SAS)	21	2 min	normal	2022-07-30 09:19:47	Finish	1	1	1	1	1	1	1	1	2	1	1	1	1	1	1	1	1	1	1	1
				Early pregnancy	Maternal mental health assessment	Self-rating Anxiety Scale (SAS)	23	3 min	normal	2022-07-30 09:34:03	Finish	1	1	1	1	1	1	1	1	1	1	1	1	1	1	1	4	1	1	1	1
				Early pregnancy	Maternal mental health assessment	Self-rating Anxiety Scale (SAS)	26	3 min	normal	2022-07-30 09:40:44	Finish	1	1	1	1	4	1	1	1	1	2	1	1	1	1	2	2	1	1	1	1
				Early pregnancy	Maternal mental health assessment	Self-rating Anxiety Scale (SAS)	25	5 min	normal	2022-07-30 09:41:10	Finish	1	1	1	1	1	1	1	1	2	2	1	1	2	1	1	1	2	1	1	2
				Early pregnancy	Maternal mental health assessment	Self-rating Anxiety Scale (SAS)	33	2 min	normal	2022-07-30 09:43:02	Finish	1	1	1	1	4	1	1	1	2	2	1	1	4	1	1	2	4	1	2	1
				3 days after delivery	Maternal mental health assessment	Self-rating Anxiety Scale (SAS)	26	2 min	normal	2022-07-30 09:43:18	Finish	1	1	1	1	4	1	1	1	1	1	1	1	4	1	1	1	1	1	1	1
				Early pregnancy	Maternal mental health assessment	Self-rating Anxiety Scale (SAS)	27	2 min	normal	2022-07-30 09:46:06	Finish	1	1	1	1	4	1	1	1	1	1	1	1	4	1	1	2	1	1	1	1
				Early pregnancy	Maternal mental health assessment	Self-rating Anxiety Scale (SAS)	20	2 min	normal	2022-07-30 09:46:56	Finish	1	1	1	1	1	1	1	1	1	1	1	1	1	1	1	1	1	1	1	1
				Early pregnancy	Maternal mental health assessment	Self-rating Anxiety Scale (SAS)	32	1 min	normal	2022-07-30 09:59:11	Finish	1	1	1	1	4	1	1	1	4	1	1	1	4	1	1	1	4	1	1	1
				Early pregnancy	Maternal mental health assessment	Self-rating Anxiety Scale (SAS)	26	9 min	normal	2022-07-30 10:07:52	Finish	1	1	1	1	1	1	1	1	1	1	1	1	4	1	2	2	2	1	1	1
				Early pregnancy	Maternal mental health assessment	Self-rating Anxiety Scale (SAS)	26	2 min	normal	2022-07-30 10:11:45	Finish	2	1	2	1	1	1	1	2	2	1	1	1	1	1	1	1	3	1	1	1
				Early pregnancy	Maternal mental health assessment	Self-rating Anxiety Scale (SAS)	29	7 min	normal	2022-07-30 10:13:16	Finish	1	1	1	1	1	1	2	1	1	2	1	1	2	1	2	2	3	1	2	2
				Early pregnancy	Maternal mental health assessment	Self-rating Anxiety Scale (SAS)	22	2 min	normal	2022-07-30 10:28:20	Finish	1	1	1	1	1	1	1	1	1	1	1	1	1	1	2	2	1	1	1	1
				Early pregnancy	Maternal mental health assessment	Self-rating Anxiety Scale (SAS)	26	2 min	normal	2022-07-30 10:29:07	Finish	2	1	1	1	2	1	1	2	2	1	1	1	1	1	1	2	1	1	2	1
				Early pregnancy	Maternal mental health assessment	Self-rating Anxiety Scale (SAS)	27	2 min	normal	2022-07-30 10:29:16	Finish	1	1	1	1	2	1	1	1	1	1	2	2	1	2	1	3	1	1	2	1
				Early pregnancy	Maternal mental health assessment	Self-rating Anxiety Scale (SAS)	27	2 min	normal	2022-07-30 10:36:44	Finish	1	1	1	1	4	1	1	1	2	1	1	1	2	1	1	2	2	1	1	1
				Early pregnancy	Maternal mental health assessment	Self-rating Anxiety Scale (SAS)	28	2 min	normal	2022-07-30 10:42:24	Finish	1	1	1	1	2	1	1	2	2	1	1	1	1	1	2	2	2	1	2	2
				Early pregnancy	Maternal mental health assessment	Self-rating Anxiety Scale (SAS)	27	2 min	normal	2022-07-30 10:46:15	Finish	2	1	1	1	2	1	1	2	2	1	1	1	1	1	2	1	2	1	2	1
				Early pregnancy	Maternal mental health assessment	Self-rating Anxiety Scale (SAS)	29	2 min	normal	2022-07-30 10:49:02	Finish	1	1	1	1	4	1	1	3	2	1	1	2	1	1	1	3	1	1	1	1
				Mid-pregnancy	Maternal mental health assessment	Self-rating Anxiety Scale (SAS)	35	2 min	normal	2022-07-30 10:51:38	Finish	2	1	1	1	2	1	2	2	2	3	2	2	1	2	1	3	2	2	2	1
				Early pregnancy	Maternal mental health assessment	Self-rating Anxiety Scale (SAS)	38	2 min	normal	2022-07-30 11:10:43	Finish	3	2	2	1	2	1	2	3	3	2	2	1	1	1	2	3	2	1	3	1
				Early pregnancy	Maternal mental health assessment	Self-rating Anxiety Scale (SAS)	45	1 min	mild	2022-07-30 13:38:37	Finish	2	2	2	1	4	1	2	3	3	1	2	1	3	1	3	4	3	1	4	2
				Early pregnancy	Maternal mental health assessment	Self-rating Anxiety Scale (SAS)	28	1 min	normal	2022-07-30 14:06:09	Finish	1	1	1	1	1	2	2	2	1	2	2	2	1	2	2	1	1	1	1	1
				3 days after delivery	Maternal mental health assessment	Self-rating Anxiety Scale (SAS)	48	2 min	mild	2022-07-30 14:30:04	Finish	3	2	2	2	3	2	2	2	3	2	2	2	3	2	2	2	3	2	4	3
				Early pregnancy	Maternal mental health assessment	Self-rating Anxiety Scale (SAS)	36	1 min	normal	2022-07-30 14:49:26	Finish	1	1	1	1	4	1	2	2	3	1	1	1	4	1	1	2	4	1	3	1
				Mid-pregnancy	Maternal mental health assessment	Self-rating Anxiety Scale (SAS)	34	2 min	normal	2022-07-30 15:53:10	Finish	1	1	1	1	4	1	2	2	3	1	1	3	1	1	1	3	1	1	3	2
				3 days after delivery	Maternal mental health assessment	Self-rating Anxiety Scale (SAS)	27	2 min	normal	2022-07-31 09:34:19	Finish	2	2	1	1	1	1	1	1	1	1	1	1	1	3	1	2	1	1	3	1
				3 days after delivery	Maternal mental health assessment	Self-rating Anxiety Scale (SAS)	29	3 min	normal	2022-07-31 10:42:03	Finish	1	1	1	1	2	1	1	2	4	1	1	1	1	1	2	3	2	1	1	1
				3 days after delivery	Maternal mental health assessment	Self-rating Anxiety Scale (SAS)	31	2 min	normal	2022-07-31 12:42:16	Finish	2	1	1	1	2	1	1	1	2	1	1	1	3	2	2	1	4	1	2	1
				3 days after delivery	Maternal mental health assessment	Self-rating Anxiety Scale (SAS)	34	2 min	normal	2022-07-31 12:55:39	Finish	2	2	2	1	1	1	1	3	1	1	2	1	1	1	1	3	2	1	3	4
				3 days after delivery	Maternal mental health assessment	Self-rating Anxiety Scale (SAS)	26	2 min	normal	2022-07-31 12:59:54	Finish	1	1	2	1	4	1	1	1	2	1	1	1	1	1	1	1	1	1	2	1
				3 days after delivery	Maternal mental health assessment	Self-rating Anxiety Scale (SAS)	35	2 min	normal	2022-07-31 13:15:38	Finish	1	1	1	1	4	1	1	1	4	1	1	1	4	1	1	2	3	1	4	1
				Early pregnancy	Maternal mental health assessment	Self-rating Anxiety Scale (SAS)	33	2 min	normal	2022-07-31 14:17:44	Finish	1	1	1	1	1	1	1	1	3	1	2	1	4	1	2	2	4	2	2	1
				Early pregnancy	Maternal mental health assessment	Self-rating Anxiety Scale (SAS)	32	3 min	normal	2022-07-31 18:29:26	Finish	1	1	1	1	2	1	1	3	1	1	1	2	1	1	3	2	3	2	2	2
				Early pregnancy	Maternal mental health assessment	Self-rating Anxiety Scale (SAS)	34	2 min	normal	2022-07-31 22:06:09	Finish	2	2	1	1	3	1	1	1	2	2	2	1	2	1	2	3	2	1	2	2
				3 days after delivery	Maternal mental health assessment	Self-rating Anxiety Scale (SAS)	26	2 min	normal	2022-08-01 08:16:10	Finish	2	1	1	1	1	1	1	2	2	1	1	1	1	1	1	3	1	1	2	1
				3 days after delivery	Maternal mental health assessment	Self-rating Anxiety Scale (SAS)	21	3 min	normal	2022-08-01 08:28:33	Finish	1	1	1	1	1	1	1	1	1	1	1	1	1	1	1	1	1	1	2	1
				Early pregnancy	Maternal mental health assessment	Self-rating Anxiety Scale (SAS)	29	3 min	normal	2022-08-01 08:30:26	Finish	2	1	1	1	2	1	1	2	2	1	1	2	1	1	1	3	2	1	2	1
				3 days after delivery	Maternal mental health assessment	Self-rating Anxiety Scale (SAS)	20	3 min	normal	2022-08-01 08:30:54	Finish	1	1	1	1	1	1	1	1	1	1	1	1	1	1	1	1	1	1	1	1
				3 days after delivery	Maternal mental health assessment	Self-rating Anxiety Scale (SAS)	35	1 min	normal	2022-08-01 08:37:37	Finish	1	1	1	1	4	1	1	1	4	1	1	1	4	1	1	1	4	1	4	1
				Early pregnancy	Maternal mental health assessment	Self-rating Anxiety Scale (SAS)	26	2 min	normal	2022-08-01 08:44:24	Finish	1	1	1	1	1	1	1	1	1	1	1	1	1	1	1	3	4	1	2	1
				Early pregnancy	Maternal mental health assessment	Self-rating Anxiety Scale (SAS)	27	6 min	normal	2022-08-01 09:28:03	Finish	2	1	1	1	4	1	1	1	1	2	1	1	1	1	1	2	1	2	1	1
				Early pregnancy	Maternal mental health assessment	Self-rating Anxiety Scale (SAS)	31	2 min	normal	2022-08-01 09:31:54	Finish	1	1	1	1	1	2	2	1	1	1	1	2	3	2	2	1	4	2	1	1
				Early pregnancy	Maternal mental health assessment	Self-rating Anxiety Scale (SAS)	32	3 min	normal	2022-08-01 09:36:49	Finish	2	2	2	1	2	1	1	3	3	1	1	1	1	1	1	3	1	1	2	2
				Early pregnancy	Maternal mental health assessment	Self-rating Anxiety Scale (SAS)	27	2 min	normal	2022-08-01 10:06:10	Finish	1	1	1	1	1	1	1	1	1	1	1	1	1	1	1	3	3	1	3	2
				3 days after delivery	Maternal mental health assessment	Self-rating Anxiety Scale (SAS)	34	7 min	normal	2022-08-01 10:19:48	Finish	1	1	2	1	3	1	2	2	4	1	1	1	1	1	2	1	2	1	4	2
				Early pregnancy	Maternal mental health assessment	Self-rating Anxiety Scale (SAS)	23	78 min	normal	2022-08-01 10:24:09	Finish	1	1	1	1	1	1	1	1	1	1	1	1	1	1	1	1	4	1	1	1
				3 days after delivery	Maternal mental health assessment	Self-rating Anxiety Scale (SAS)	25	2 min	normal	2022-08-01 10:26:19	Finish	1	1	1	1	1	1	2	2	3	1	1	1	1	1	1	1	1	1	2	1
				3 days after delivery	Maternal mental health assessment	Self-rating Anxiety Scale (SAS)	23	7 min	normal	2022-08-01 10:38:02	Finish	1	1	1	1	1	1	1	1	1	1	1	1	1	2	1	1	1	1	2	2
				Early pregnancy	Maternal mental health assessment	Self-rating Anxiety Scale (SAS)	34	1 min	normal	2022-08-01 10:59:13	Finish	1	1	1	1	4	2	2	1	1	1	2	2	1	2	2	3	3	2	1	1
				3 days after delivery	Maternal mental health assessment	Self-rating Anxiety Scale (SAS)	27	2 min	normal	2022-08-01 10:59:34	Finish	1	1	1	1	4	2	1	1	2	1	1	1	1	1	1	2	1	1	2	1
				3 days after delivery	Maternal mental health assessment	Self-rating Anxiety Scale (SAS)	20	1 min	normal	2022-08-01 11:02:41	Finish	1	1	1	1	1	1	1	1	1	1	1	1	1	1	1	1	1	1	1	1
				Early pregnancy	Maternal mental health assessment	Self-rating Anxiety Scale (SAS)	25	2 min	normal	2022-08-01 11:08:01	Finish	1	1	1	1	1	1	1	1	2	1	1	1	1	1	1	2	2	1	2	2
				Early pregnancy	Maternal mental health assessment	Self-rating Anxiety Scale (SAS)	36	2 min	normal	2022-08-01 11:17:32	Finish	3	1	2	1	1	1	1	3	2	2	2	3	1	1	1	3	2	1	3	2
				3 days after delivery	Maternal mental health assessment	Self-rating Anxiety Scale (SAS)	34	2 min	normal	2022-08-01 11:23:38	Finish	1	1	1	1	4	1	2	1	4	2	2	1	1	1	2	2	2	2	1	2
				Early pregnancy	Maternal mental health assessment	Self-rating Anxiety Scale (SAS)	29	2 min	normal	2022-08-01 11:38:39	Finish	2	1	1	1	1	1	1	2	2	2	1	1	1	1	1	3	2	2	2	1
				3 days after delivery	Maternal mental health assessment	Self-rating Anxiety Scale (SAS)	31	3 min	normal	2022-08-01 12:04:59	Finish	2	1	1	1	4	1	1	1	2	1	1	1	2	1	1	3	2	1	3	1
				3 days after delivery	Maternal mental health assessment	Self-rating Anxiety Scale (SAS)	40	14 min	normal	2022-08-01 12:37:51	Finish	2	1	1	1	4	1	2	3	2	2	1	1	2	2	2	3	2	2	3	3
				Early pregnancy	Maternal mental health assessment	Self-rating Anxiety Scale (SAS)	34	2 min	normal	2022-08-01 12:50:11	Finish	1	1	2	1	2	1	2	3	2	1	1	1	2	2	1	3	3	1	3	1
				Early pregnancy	Maternal mental health assessment	Self-rating Anxiety Scale (SAS)	24	1 min	normal	2022-08-01 13:45:43	Finish	1	1	1	1	1	1	1	1	1	2	1	1	1	1	1	1	3	2	1	1
				3 days after delivery	Maternal mental health assessment	Self-rating Anxiety Scale (SAS)	22	12 min	normal	2022-08-01 15:47:26	Finish	1	1	1	1	1	1	1	1	1	1	1	1	1	1	1	3	1	1	1	1
				Early pregnancy	Maternal mental health assessment	Self-rating Anxiety Scale (SAS)	37	1 min	normal	2022-08-01 16:32:56	Finish	1	1	1	1	4	1	1	1	4	2	1	1	4	1	2	1	4	1	4	1
				Early pregnancy	Maternal mental health assessment	Self-rating Anxiety Scale (SAS)	23	2 min	normal	2022-08-01 17:04:03	Finish	1	1	1	1	2	1	1	1	1	1	1	1	1	1	1	2	1	1	2	1
				Early pregnancy	Maternal mental health assessment	Self-rating Anxiety Scale (SAS)	27	2 min	normal	2022-08-01 17:09:45	Finish	1	1	1	1	4	1	1	1	4	1	1	1	1	1	1	2	1	1	1	1
				Early pregnancy	Maternal mental health assessment	Self-rating Anxiety Scale (SAS)	40	2 min	normal	2022-08-01 17:32:18	Finish	1	2	2	1	4	2	1	3	4	1	1	1	4	1	2	2	2	1	3	2
				Early pregnancy	Maternal mental health assessment	Self-rating Anxiety Scale (SAS)	28	1 min	normal	2022-08-02 06:53:27	Finish	1	1	1	1	4	1	1	1	1	1	1	1	4	1	1	2	1	1	1	2
				Early pregnancy	Maternal mental health assessment	Self-rating Anxiety Scale (SAS)	22	2 min	normal	2022-08-02 07:51:10	Finish	1	1	1	1	1	1	1	1	1	1	1	1	1	1	1	2	1	1	2	1
				Late pregnancy	Maternal mental health assessment	Self-rating Anxiety Scale (SAS)	40	3 min	normal	2022-08-02 08:49:39	Finish	2	2	2	2	4	1	2	1	3	2	1	2	4	1	1	2	2	2	2	2
				Early pregnancy	Maternal mental health assessment	Self-rating Anxiety Scale (SAS)	30	1 min	normal	2022-08-02 08:53:33	Finish	1	1	1	1	4	1	1	1	4	1	1	1	4	1	1	2	1	1	1	1
				Early pregnancy	Maternal mental health assessment	Self-rating Anxiety Scale (SAS)	23	3 min	normal	2022-08-02 09:07:38	Finish	1	1	1	1	4	1	1	1	1	1	1	1	1	1	1	1	1	1	1	1
				Early pregnancy	Maternal mental health assessment	Self-rating Anxiety Scale (SAS)	30	1 min	normal	2022-08-02 09:20:17	Finish	2	1	1	1	1	1	2	1	1	3	1	1	1	1	2	4	1	1	2	2
				Early pregnancy	Maternal mental health assessment	Self-rating Anxiety Scale (SAS)	26	1 min	normal	2022-08-02 09:26:19	Finish	1	1	1	1	1	1	1	1	1	1	1	1	4	1	2	2	1	1	2	1
				3 days after delivery	Maternal mental health assessment	Self-rating Anxiety Scale (SAS)	32	2 min	normal	2022-08-02 09:37:47	Finish	2	2	2	2	2	1	1	1	2	1	2	1	1	1	1	2	2	2	2	2
				Early pregnancy	Maternal mental health assessment	Self-rating Anxiety Scale (SAS)	25	2 min	normal	2022-08-02 09:48:49	Finish	1	1	1	1	2	1	1	1	2	1	1	1	1	1	1	3	2	1	1	1
				Early pregnancy	Maternal mental health assessment	Self-rating Anxiety Scale (SAS)	31	2 min	normal	2022-08-02 09:56:24	Finish	2	2	1	1	2	1	1	2	1	2	1	1	2	1	2	1	2	1	3	2
				3 days after delivery	Maternal mental health assessment	Self-rating Anxiety Scale (SAS)	28	11 min	normal	2022-08-02 09:57:20	Finish	2	1	1	1	1	1	1	3	1	2	1	1	2	1	1	3	1	1	2	1
				Early pregnancy	Maternal mental health assessment	Self-rating Anxiety Scale (SAS)	27	2 min	normal	2022-08-02 09:59:27	Finish	1	1	1	1	1	1	1	1	1	1	1	2	1	1	4	3	1	1	2	1
				Early pregnancy	Maternal mental health assessment	Self-rating Anxiety Scale (SAS)	32	15 min	normal	2022-08-02 10:01:23	Finish	1	1	2	1	4	1	2	2	1	1	1	1	1	1	3	3	1	1	3	1
				Early pregnancy	Maternal mental health assessment	Self-rating Anxiety Scale (SAS)	27	2 min	normal	2022-08-02 10:02:56	Finish	1	1	1	1	1	1	1	1	1	1	2	1	1	1	1	2	4	1	3	1
				Early pregnancy	Maternal mental health assessment	Self-rating Anxiety Scale (SAS)	26	2 min	normal	2022-08-02 10:09:56	Finish	1	1	1	1	4	1	1	2	1	2	1	1	1	1	2	1	1	1	1	1
				3 days after delivery	Maternal mental health assessment	Self-rating Anxiety Scale (SAS)	24	2 min	normal	2022-08-02 10:13:21	Finish	1	1	1	1	1	1	1	1	1	1	1	1	4	1	1	2	1	1	1	1
				Early pregnancy	Maternal mental health assessment	Self-rating Anxiety Scale (SAS)	30	2 min	normal	2022-08-02 10:18:39	Finish	1	1	1	1	2	1	2	2	1	1	1	1	4	2	1	2	3	1	1	1
				3 days after delivery	Maternal mental health assessment	Self-rating Anxiety Scale (SAS)	30	9 min	normal	2022-08-02 10:19:43	Finish	1	1	1	1	4	1	1	1	3	1	1	1	4	1	1	2	2	1	1	1
				Early pregnancy	Maternal mental health assessment	Self-rating Anxiety Scale (SAS)	35	1 min	normal	2022-08-02 10:22:19	Finish	3	2	2	1	2	1	1	3	2	2	1	1	2	1	1	3	2	1	3	1
				Early pregnancy	Maternal mental health assessment	Self-rating Anxiety Scale (SAS)	32	2 min	normal	2022-08-02 10:25:19	Finish	1	1	1	1	4	1	1	1	3	1	1	1	3	1	1	2	2	2	3	1
				Early pregnancy	Maternal mental health assessment	Self-rating Anxiety Scale (SAS)	26	8 min	normal	2022-08-02 10:41:08	Finish	1	1	1	1	4	1	1	1	1	1	1	1	4	1	1	1	1	1	1	1
				3 days after delivery	Maternal mental health assessment	Self-rating Anxiety Scale (SAS)	30	2 min	normal	2022-08-02 10:42:03	Finish	1	1	1	1	4	1	1	1	4	1	1	1	1	1	2	3	1	2	1	1
				Early pregnancy	Maternal mental health assessment	Self-rating Anxiety Scale (SAS)	28	4 min	normal	2022-08-02 10:43:27	Finish	2	1	1	1	1	1	1	2	1	2	1	1	2	1	1	4	1	1	2	1
				Early pregnancy	Maternal mental health assessment	Self-rating Anxiety Scale (SAS)	36	19 min	normal	2022-08-02 10:50:10	Finish	2	1	1	1	2	1	1	2	3	3	2	2	2	1	3	2	2	2	2	1
				Early pregnancy	Maternal mental health assessment	Self-rating Anxiety Scale (SAS)	26	2 min	normal	2022-08-02 10:51:26	Finish	1	1	1	1	1	1	2	2	1	1	2	1	1	1	2	2	1	1	1	2
				Early pregnancy	Maternal mental health assessment	Self-rating Anxiety Scale (SAS)	25	2 min	normal	2022-08-02 10:55:56	Finish	1	1	1	1	1	1	2	1	1	1	2	1	1	1	1	3	1	1	2	1
				Early pregnancy	Maternal mental health assessment	Self-rating Anxiety Scale (SAS)	32	2 min	normal	2022-08-02 11:01:31	Finish	2	1	1	1	4	1	1	3	2	1	2	1	2	1	1	2	2	1	2	1
				3 days after delivery	Maternal mental health assessment	Self-rating Anxiety Scale (SAS)	27	2 min	normal	2022-08-02 11:02:39	Finish	1	1	1	1	4	1	1	1	3	1	1	1	2	1	1	1	1	1	2	1
				Early pregnancy	Maternal mental health assessment	Self-rating Anxiety Scale (SAS)	34	5 min	normal	2022-08-02 11:11:36	Finish	1	1	1	1	4	1	1	1	3	1	1	1	4	1	1	4	2	1	2	2
				3 days after delivery	Maternal mental health assessment	Self-rating Anxiety Scale (SAS)	26	3 min	normal	2022-08-02 11:14:27	Finish	1	1	1	1	1	1	1	1	4	1	1	1	1	1	1	1	2	1	3	1
				3 days after delivery	Maternal mental health assessment	Self-rating Anxiety Scale (SAS)	49	2 min	mild	2022-08-02 11:16:03	Finish	3	2	3	2	2	2	2	3	2	3	2	2	3	3	3	3	2	3	3	1
				Early pregnancy	Maternal mental health assessment	Self-rating Anxiety Scale (SAS)	30	2 min	normal	2022-08-02 11:25:32	Finish	1	1	1	1	1	1	1	2	2	1	1	1	2	1	1	3	2	3	3	1
				3 days after delivery	Maternal mental health assessment	Self-rating Anxiety Scale (SAS)	35	2 min	normal	2022-08-02 11:55:20	Finish	2	1	1	1	4	1	2	2	3	1	2	1	1	1	2	3	2	1	3	1
				Early pregnancy	Maternal mental health assessment	Self-rating Anxiety Scale (SAS)	31	2 min	normal	2022-08-02 11:57:01	Finish	1	1	1	1	1	1	2	2	2	2	1	1	4	1	1	3	2	1	1	2
				Late pregnancy	Maternal mental health assessment	Self-rating Anxiety Scale (SAS)	37	2 min	normal	2022-08-02 13:45:50	Finish	1	1	2	1	4	1	1	1	4	2	1	1	4	1	1	4	4	1	1	1
				Early pregnancy	Maternal mental health assessment	Self-rating Anxiety Scale (SAS)	40	2 min	normal	2022-08-02 13:50:24	Finish	2	2	1	1	4	1	2	2	3	2	1	2	2	2	1	4	3	1	2	2
				Early pregnancy	Maternal mental health assessment	Self-rating Anxiety Scale (SAS)	29	2 min	normal	2022-08-02 14:05:16	Finish	1	1	1	1	2	1	1	1	2	1	1	1	1	1	2	2	4	2	1	2
				Early pregnancy	Maternal mental health assessment	Self-rating Anxiety Scale (SAS)	41	2 min	normal	2022-08-02 14:43:01	Finish	1	1	1	1	2	2	2	3	3	3	3	3	3	1	1	2	2	2	4	1
				Early pregnancy	Maternal mental health assessment	Self-rating Anxiety Scale (SAS)	36	3 min	normal	2022-08-02 15:03:21	Finish	1	1	1	1	4	1	1	1	4	1	1	1	4	1	1	4	2	1	4	1
				Mid-pregnancy	Maternal mental health assessment	Self-rating Anxiety Scale (SAS)	29	2 min	normal	2022-08-02 15:06:38	Finish	1	1	1	1	4	1	1	1	2	1	1	1	2	1	1	1	4	1	2	1
				Early pregnancy	Maternal mental health assessment	Self-rating Anxiety Scale (SAS)	36	2 min	normal	2022-08-02 15:18:15	Finish	2	2	1	1	4	1	1	2	3	2	2	1	2	1	1	3	2	2	2	1
				3 days after delivery	Maternal mental health assessment	Self-rating Anxiety Scale (SAS)	28	2 min	normal	2022-08-02 15:25:44	Finish	1	1	1	1	2	1	1	1	4	1	1	2	1	1	1	2	2	1	2	1
				3 days after delivery	Maternal mental health assessment	Self-rating Anxiety Scale (SAS)	27	3 min	normal	2022-08-02 17:02:47	Finish	1	1	1	1	1	1	1	2	1	2	1	1	1	1	2	3	1	1	3	1
				3 days after delivery	Maternal mental health assessment	Self-rating Anxiety Scale (SAS)	32	2 min	normal	2022-08-03 08:30:04	Finish	1	1	1	1	4	1	1	2	2	1	1	1	4	1	1	2	2	1	3	1
				Early pregnancy	Maternal mental health assessment	Self-rating Anxiety Scale (SAS)	47	2 min	mild	2022-08-03 08:35:22	Finish	2	1	1	1	4	1	2	3	3	3	3	2	4	1	3	4	1	2	4	2
				3 days after delivery	Maternal mental health assessment	Self-rating Anxiety Scale (SAS)	32	2 min	normal	2022-08-03 08:38:38	Finish	1	1	1	1	4	1	1	1	2	1	1	1	4	1	1	1	4	1	3	1
				Early pregnancy	Maternal mental health assessment	Self-rating Anxiety Scale (SAS)	21	2 min	normal	2022-08-03 08:54:49	Finish	1	1	1	1	1	1	1	1	1	1	1	1	1	1	2	1	1	1	1	1
				Early pregnancy	Maternal mental health assessment	Self-rating Anxiety Scale (SAS)	38	2 min	normal	2022-08-03 08:58:39	Finish	2	1	1	1	4	1	1	2	3	2	1	1	2	1	2	3	1	2	4	3
				Early pregnancy	Maternal mental health assessment	Self-rating Anxiety Scale (SAS)	42	3 min	normal	2022-08-03 09:05:28	Finish	2	2	2	1	1	1	1	4	3	3	2	2	2	1	2	3	3	2	2	3
				Early pregnancy	Maternal mental health assessment	Self-rating Anxiety Scale (SAS)	29	2 min	normal	2022-08-03 09:13:48	Finish	2	1	2	1	3	1	1	1	1	1	1	1	1	1	3	3	1	1	2	1
				Early pregnancy	Maternal mental health assessment	Self-rating Anxiety Scale (SAS)	35	3 min	normal	2022-08-03 09:23:46	Finish	2	1	2	2	1	1	2	2	3	1	1	1	1	1	2	3	3	1	3	2
				Early pregnancy	Maternal mental health assessment	Self-rating Anxiety Scale (SAS)	48	2 min	mild	2022-08-03 09:31:56	Finish	2	2	2	2	3	2	2	3	2	2	2	2	3	2	2	3	3	3	3	3
				Early pregnancy	Maternal mental health assessment	Self-rating Anxiety Scale (SAS)	38	1 min	normal	2022-08-03 09:31:57	Finish	1	1	1	1	4	1	1	1	4	1	1	2	4	1	1	3	4	1	3	2
				Early pregnancy	Maternal mental health assessment	Self-rating Anxiety Scale (SAS)	32	2 min	normal	2022-08-03 09:37:13	Finish	1	1	1	1	4	1	1	1	2	2	1	1	1	1	1	1	2	1	4	4
				Early pregnancy	Maternal mental health assessment	Self-rating Anxiety Scale (SAS)	31	2 min	normal	2022-08-03 09:40:33	Finish	1	1	1	1	4	1	1	1	1	1	1	1	1	1	2	3	3	2	3	1
				Early pregnancy	Maternal mental health assessment	Self-rating Anxiety Scale (SAS)	27	2 min	normal	2022-08-03 09:50:15	Finish	1	1	1	1	1	1	1	1	1	1	1	1	4	1	2	2	2	1	2	1
				Early pregnancy	Maternal mental health assessment	Self-rating Anxiety Scale (SAS)	32	2 min	normal	2022-08-03 09:52:34	Finish	2	1	1	1	1	1	2	2	2	1	2	1	1	1	3	3	2	1	2	2
				Early pregnancy	Maternal mental health assessment	Self-rating Anxiety Scale (SAS)	39	29 min	normal	2022-08-03 09:56:58	Finish	2	2	2	1	3	1	3	3	2	3	2	2	2	1	1	3	2	1	2	1
				Early pregnancy	Maternal mental health assessment	Self-rating Anxiety Scale (SAS)	31	1 min	normal	2022-08-03 10:13:11	Finish	1	1	1	1	4	1	1	1	4	1	1	1	4	1	1	2	1	1	2	1
				Early pregnancy	Maternal mental health assessment	Self-rating Anxiety Scale (SAS)	34	3 min	normal	2022-08-03 10:15:58	Finish	2	1	1	1	2	1	3	3	3	1	1	1	1	1	1	4	1	1	3	2
				Early pregnancy	Maternal mental health assessment	Self-rating Anxiety Scale (SAS)	26	2 min	normal	2022-08-03 10:27:52	Finish	2	1	2	1	1	1	1	1	4	1	1	1	1	1	1	2	1	1	1	1
				3 days after delivery	Maternal mental health assessment	Self-rating Anxiety Scale (SAS)	35	2 min	normal	2022-08-03 10:31:30	Finish	1	1	1	1	4	1	1	1	4	1	1	1	4	1	1	2	4	1	2	2
				Early pregnancy	Maternal mental health assessment	Self-rating Anxiety Scale (SAS)	26	1 min	normal	2022-08-03 10:57:02	Finish	1	1	1	1	1	1	1	3	1	1	1	1	1	1	1	3	1	2	2	1
				Early pregnancy	Maternal mental health assessment	Self-rating Anxiety Scale (SAS)	31	2 min	normal	2022-08-03 11:06:03	Finish	1	1	1	1	4	1	1	2	2	1	2	1	2	1	3	2	2	1	1	1
				Early pregnancy	Maternal mental health assessment	Self-rating Anxiety Scale (SAS)	33	2 min	normal	2022-08-03 11:18:30	Finish	1	1	1	1	4	1	1	2	2	1	2	1	2	1	2	3	1	2	3	1
				3 days after delivery	Maternal mental health assessment	Self-rating Anxiety Scale (SAS)	25	2 min	normal	2022-08-03 11:25:30	Finish	2	1	2	1	3	1	1	1	1	1	1	1	1	1	1	1	1	2	1	1
				Mid-pregnancy	Maternal mental health assessment	Self-rating Anxiety Scale (SAS)	34	3 min	normal	2022-08-03 11:25:52	Finish	1	1	1	1	4	1	1	1	4	1	1	1	4	1	1	3	4	1	1	1
				3 days after delivery	Maternal mental health assessment	Self-rating Anxiety Scale (SAS)	25	2 min	normal	2022-08-03 11:32:59	Finish	1	1	1	1	4	1	1	1	1	1	1	1	1	1	1	2	1	2	1	1
				3 days after delivery	Maternal mental health assessment	Self-rating Anxiety Scale (SAS)	27	2 min	normal	2022-08-03 12:01:14	Finish	2	1	1	1	2	1	1	1	1	1	1	1	4	1	1	1	1	1	3	1
				3 days after delivery	Maternal mental health assessment	Self-rating Anxiety Scale (SAS)	29	2 min	normal	2022-08-03 12:08:01	Finish	2	2	1	1	3	1	1	1	2	1	1	1	1	1	1	2	2	1	3	1
				Early pregnancy	Maternal mental health assessment	Self-rating Anxiety Scale (SAS)	33	27 min	normal	2022-08-03 13:21:43	Finish	1	1	1	1	2	1	1	1	4	1	1	1	4	1	1	2	4	1	3	1
				3 days after delivery	Maternal mental health assessment	Self-rating Anxiety Scale (SAS)	27	2 min	normal	2022-08-03 13:35:58	Finish	1	1	1	1	2	1	2	1	3	1	1	1	1	1	1	1	2	2	2	1
				Early pregnancy	Maternal mental health assessment	Self-rating Anxiety Scale (SAS)	36	2 min	normal	2022-08-03 13:42:58	Finish	2	1	1	1	4	1	1	2	3	1	1	1	4	1	1	2	4	1	2	2
				3 days after delivery	Maternal mental health assessment	Self-rating Anxiety Scale (SAS)	25	3 min	normal	2022-08-03 14:04:52	Finish	1	1	1	1	1	1	1	3	2	1	1	1	1	1	1	3	1	1	1	1
				3 days after delivery	Maternal mental health assessment	Self-rating Anxiety Scale (SAS)	33	2 min	normal	2022-08-03 14:13:58	Finish	1	1	1	1	1	1	1	2	2	2	1	1	1	1	3	3	3	2	4	1
				Early pregnancy	Maternal mental health assessment	Self-rating Anxiety Scale (SAS)	26	1 min	normal	2022-08-03 14:32:57	Finish	1	1	1	1	4	1	1	1	1	1	1	1	1	1	1	2	1	1	3	1
				Early pregnancy	Maternal mental health assessment	Self-rating Anxiety Scale (SAS)	35	1 min	normal	2022-08-03 14:35:16	Finish	1	1	1	1	4	1	1	1	4	1	1	1	4	1	1	1	4	1	4	1
				Mid-pregnancy	Maternal mental health assessment	Self-rating Anxiety Scale (SAS)	35	1 min	normal	2022-08-03 14:37:15	Finish	1	1	1	1	4	1	1	1	4	1	1	1	4	1	1	1	4	1	4	1
				Early pregnancy	Maternal mental health assessment	Self-rating Anxiety Scale (SAS)	34	3 min	normal	2022-08-03 14:46:02	Finish	2	1	1	1	4	1	1	1	4	1	1	1	4	1	1	3	2	1	2	1
				Early pregnancy	Maternal mental health assessment	Self-rating Anxiety Scale (SAS)	35	1 min	normal	2022-08-04 08:17:40	Finish	2	1	1	1	1	1	1	1	2	2	1	1	4	1	3	3	2	3	3	1
				Early pregnancy	Maternal mental health assessment	Self-rating Anxiety Scale (SAS)	22	2 min	normal	2022-08-04 08:55:53	Finish	1	1	1	1	1	1	1	1	1	1	1	1	1	1	1	2	1	1	2	1
				Early pregnancy	Maternal mental health assessment	Self-rating Anxiety Scale (SAS)	34	1 min	normal	2022-08-04 09:03:41	Finish	1	2	1	1	4	1	1	1	4	1	1	1	4	1	1	1	4	1	2	1
				Early pregnancy	Maternal mental health assessment	Self-rating Anxiety Scale (SAS)	43	13 min	mild	2022-08-04 09:17:32	Finish	2	2	2	2	3	1	2	2	3	2	3	1	3	2	2	3	3	2	2	1
				Early pregnancy	Maternal mental health assessment	Self-rating Anxiety Scale (SAS)	30	2 min	normal	2022-08-04 09:18:56	Finish	1	1	2	1	1	2	1	4	1	1	1	2	1	1	3	1	2	1	1	2
				Early pregnancy	Maternal mental health assessment	Self-rating Anxiety Scale (SAS)	32	5 min	normal	2022-08-04 09:20:08	Finish	2	1	1	1	4	1	1	1	2	1	1	2	4	1	1	2	2	1	2	1
				Postpartum 42 days	Maternal mental health assessment	Self-rating Anxiety Scale (SAS)	30	2 min	normal	2022-08-04 09:23:25	Finish	1	1	1	1	4	1	1	1	2	1	1	1	2	1	1	1	3	1	3	2
				Early pregnancy	Maternal mental health assessment	Self-rating Anxiety Scale (SAS)	33	2 min	normal	2022-08-04 09:26:29	Finish	2	2	2	1	1	1	2	3	2	3	2	1	1	1	2	2	1	2	1	1
				3 days after delivery	Maternal mental health assessment	Self-rating Anxiety Scale (SAS)	30	2 min	normal	2022-08-04 09:29:32	Finish	1	1	1	1	4	1	1	1	1	1	1	1	1	1	1	3	2	2	4	1
				Early pregnancy	Maternal mental health assessment	Self-rating Anxiety Scale (SAS)	29	2 min	normal	2022-08-04 09:36:25	Finish	1	1	1	1	4	1	1	2	2	1	1	1	1	1	1	2	1	2	2	2
				Early pregnancy	Maternal mental health assessment	Self-rating Anxiety Scale (SAS)	40	2 min	normal	2022-08-04 09:38:20	Finish	2	1	1	1	4	2	1	2	2	2	1	2	4	1	3	2	3	2	2	2
				Early pregnancy	Maternal mental health assessment	Self-rating Anxiety Scale (SAS)	23	2 min	normal	2022-08-04 09:58:17	Finish	1	1	1	1	1	1	1	1	2	1	1	1	1	1	1	2	1	1	1	2
				Early pregnancy	Maternal mental health assessment	Self-rating Anxiety Scale (SAS)	33	2 min	normal	2022-08-04 10:06:19	Finish	1	1	1	1	4	1	1	1	2	1	1	1	4	1	1	2	3	1	3	2
				Early pregnancy	Maternal mental health assessment	Self-rating Anxiety Scale (SAS)	20	4 min	normal	2022-08-04 10:25:25	Finish	1	1	1	1	1	1	1	1	1	1	1	1	1	1	1	1	1	1	1	1
				Late pregnancy	Maternal mental health assessment	Self-rating Anxiety Scale (SAS)	35	3 min	normal	2022-08-04 10:34:08	Finish	1	1	1	1	4	1	1	1	4	1	1	1	4	1	1	2	4	1	3	1
				Early pregnancy	Maternal mental health assessment	Self-rating Anxiety Scale (SAS)	32	2 min	normal	2022-08-04 10:34:46	Finish	1	1	1	1	2	1	2	2	2	1	2	1	4	1	1	3	2	1	2	1
				Early pregnancy	Maternal mental health assessment	Self-rating Anxiety Scale (SAS)	28	3 min	normal	2022-08-04 10:35:36	Finish	2	1	1	1	1	1	1	2	1	1	1	1	1	1	3	2	3	2	1	1
				Late pregnancy	Maternal mental health assessment	Self-rating Anxiety Scale (SAS)	23	5 min	normal	2022-08-04 10:56:21	Finish	1	1	1	1	1	1	1	1	1	1	1	1	1	1	1	2	3	1	1	1
				Early pregnancy	Maternal mental health assessment	Self-rating Anxiety Scale (SAS)	34	2 min	normal	2022-08-04 10:59:53	Finish	1	1	1	1	4	1	1	1	4	1	1	1	1	4	1	2	4	1	2	1
				Early pregnancy	Maternal mental health assessment	Self-rating Anxiety Scale (SAS)	28	3 min	normal	2022-08-04 11:00:25	Finish	1	1	1	1	2	1	1	2	2	1	1	1	1	1	1	3	2	2	2	1
				3 days after delivery	Maternal mental health assessment	Self-rating Anxiety Scale (SAS)	28	6 min	normal	2022-08-04 11:01:11	Finish	2	1	2	1	2	1	2	2	2	1	1	1	1	1	1	1	1	1	3	1
				Early pregnancy	Maternal mental health assessment	Self-rating Anxiety Scale (SAS)	33	13 min	normal	2022-08-04 11:03:34	Finish	2	1	1	1	4	1	1	2	2	1	2	1	2	1	2	2	2	1	3	1
				3 days after delivery	Maternal mental health assessment	Self-rating Anxiety Scale (SAS)	27	12 min	normal	2022-08-04 11:10:47	Finish	1	1	1	1	3	1	2	1	2	1	1	1	1	1	1	3	1	1	2	1
				Early pregnancy	Maternal mental health assessment	Self-rating Anxiety Scale (SAS)	48	3 min	mild	2022-08-04 11:51:56	Finish	2	2	2	2	3	2	1	3	3	3	2	2	2	3	2	3	3	2	4	2
				3 days after delivery	Maternal mental health assessment	Self-rating Anxiety Scale (SAS)	35	3 min	normal	2022-08-04 13:52:57	Finish	1	1	1	1	1	1	2	3	2	3	3	3	2	1	1	1	4	1	2	1
				Early pregnancy	Maternal mental health assessment	Self-rating Anxiety Scale (SAS)	36	3 min	normal	2022-08-04 14:11:11	Finish	2	2	2	1	2	1	1	2	2	2	1	1	2	1	1	3	2	1	4	3
				Early pregnancy	Maternal mental health assessment	Self-rating Anxiety Scale (SAS)	44	2 min	mild	2022-08-04 14:16:00	Finish	2	2	3	2	3	1	1	2	3	3	2	2	2	1	3	2	3	2	3	2
				3 days after delivery	Maternal mental health assessment	Self-rating Anxiety Scale (SAS)	38	2 min	normal	2022-08-04 15:10:03	Finish	2	2	2	2	4	1	1	1	2	3	1	1	4	1	2	3	2	1	2	1
				3 days after delivery	Maternal mental health assessment	Self-rating Anxiety Scale (SAS)	33	3 min	normal	2022-08-04 15:14:54	Finish	1	1	1	1	4	1	1	1	2	1	1	1	3	1	1	2	4	1	3	2
				3 days after delivery	Maternal mental health assessment	Self-rating Anxiety Scale (SAS)	25	2 min	normal	2022-08-04 15:40:58	Finish	1	1	1	1	1	1	1	2	1	1	1	1	4	1	1	1	1	1	2	1
				Early pregnancy	Maternal mental health assessment	Self-rating Anxiety Scale (SAS)	32	2 min	normal	2022-08-05 08:06:12	Finish	2	1	1	1	2	1	2	1	2	2	2	2	2	1	2	2	2	1	2	1
				Early pregnancy	Maternal mental health assessment	Self-rating Anxiety Scale (SAS)	30	13 min	normal	2022-08-05 08:09:03	Finish	1	1	1	1	4	1	1	1	4	1	1	1	2	1	1	2	2	1	2	1
				Early pregnancy	Maternal mental health assessment	Self-rating Anxiety Scale (SAS)	27	10 min	normal	2022-08-05 08:21:19	Finish	2	1	1	1	1	1	2	1	1	2	2	1	1	1	2	2	1	1	1	2
				Early pregnancy	Maternal mental health assessment	Self-rating Anxiety Scale (SAS)	31	2 min	normal	2022-08-05 08:50:29	Finish	1	1	1	1	2	1	1	2	2	1	2	2	1	1	3	3	2	1	2	1
				Early pregnancy	Maternal mental health assessment	Self-rating Anxiety Scale (SAS)	36	2 min	normal	2022-08-05 08:53:10	Finish	2	2	2	1	4	1	3	2	2	1	2	1	1	1	2	3	1	1	2	2
				3 days after delivery	Maternal mental health assessment	Self-rating Anxiety Scale (SAS)	36	3 min	normal	2022-08-05 09:04:26	Finish	1	1	1	1	4	1	2	2	4	1	1	1	4	1	1	1	3	1	3	2
				Early pregnancy	Maternal mental health assessment	Self-rating Anxiety Scale (SAS)	25	2 min	normal	2022-08-05 09:12:34	Finish	1	1	1	1	4	1	1	1	2	1	1	1	1	1	1	2	1	1	1	1
				Early pregnancy	Maternal mental health assessment	Self-rating Anxiety Scale (SAS)	23	2 min	normal	2022-08-05 09:16:07	Finish	1	1	1	1	1	1	1	1	1	1	1	1	1	1	1	2	1	2	2	1
				Early pregnancy	Maternal mental health assessment	Self-rating Anxiety Scale (SAS)	35	2 min	normal	2022-08-05 09:17:53	Finish	1	1	1	1	2	1	2	2	3	2	1	1	3	1	2	3	2	1	4	1
				Early pregnancy	Maternal mental health assessment	Self-rating Anxiety Scale (SAS)	41	1 min	normal	2022-08-05 09:20:57	Finish	1	1	1	1	4	1	1	1	4	3	2	1	2	2	2	3	3	3	4	1
				3 days after delivery	Maternal mental health assessment	Self-rating Anxiety Scale (SAS)	27	3 min	normal	2022-08-05 09:24:11	Finish	2	1	1	1	1	1	1	1	1	2	1	1	1	1	1	3	2	2	2	1
				Early pregnancy	Maternal mental health assessment	Self-rating Anxiety Scale (SAS)	36	2 min	normal	2022-08-05 09:24:50	Finish	3	2	3	1	3	1	2	3	4	1	1	1	2	1	1	1	2	1	2	1
				Early pregnancy	Maternal mental health assessment	Self-rating Anxiety Scale (SAS)	26	1 min	normal	2022-08-05 09:32:19	Finish	1	1	1	1	4	1	1	1	1	1	1	1	1	1	1	3	1	1	1	2
				Early pregnancy	Maternal mental health assessment	Self-rating Anxiety Scale (SAS)	26	10 min	normal	2022-08-05 09:35:05	Finish	1	1	1	1	1	1	1	2	2	1	1	1	1	1	2	3	2	1	1	1
				Early pregnancy	Maternal mental health assessment	Self-rating Anxiety Scale (SAS)	22	3 min	normal	2022-08-05 09:47:17	Finish	1	1	1	1	1	1	1	1	1	1	1	1	1	1	1	3	1	1	1	1
				Early pregnancy	Maternal mental health assessment	Self-rating Anxiety Scale (SAS)	20	2 min	normal	2022-08-05 09:48:14	Finish	1	1	1	1	1	1	1	1	1	1	1	1	1	1	1	1	1	1	1	1
				Early pregnancy	Maternal mental health assessment	Self-rating Anxiety Scale (SAS)	30	2 min	normal	2022-08-05 09:49:34	Finish	2	2	1	1	1	1	1	2	1	2	1	1	3	1	1	2	1	2	2	2
				Early pregnancy	Maternal mental health assessment	Self-rating Anxiety Scale (SAS)	26	24 min	normal	2022-08-05 09:56:29	Finish	1	1	1	1	2	1	1	2	2	1	1	1	1	1	1	2	2	1	2	1
				Early pregnancy	Maternal mental health assessment	Self-rating Anxiety Scale (SAS)	23	2 min	normal	2022-08-05 10:01:51	Finish	1	1	1	1	1	1	2	2	1	1	1	1	1	1	1	2	1	1	1	1
				Late pregnancy	Maternal mental health assessment	Self-rating Anxiety Scale (SAS)	26	3 min	normal	2022-08-05 10:02:20	Finish	1	1	1	1	2	1	1	1	2	1	1	2	2	1	1	2	2	1	1	1
				3 days after delivery	Maternal mental health assessment	Self-rating Anxiety Scale (SAS)	33	3 min	normal	2022-08-05 10:02:50	Finish	1	1	1	1	4	1	1	1	2	2	1	1	4	1	1	3	2	1	2	2
				Early pregnancy	Maternal mental health assessment	Self-rating Anxiety Scale (SAS)	24	2 min	normal	2022-08-05 10:08:30	Finish	1	1	1	1	1	1	1	1	2	1	1	1	1	1	1	2	1	2	2	1
				Early pregnancy	Maternal mental health assessment	Self-rating Anxiety Scale (SAS)	37	2 min	normal	2022-08-05 10:09:28	Finish	2	1	1	1	4	1	1	1	2	3	1	1	4	1	2	2	4	1	2	2
				Mid-pregnancy	Maternal mental health assessment	Self-rating Anxiety Scale (SAS)	37	3 min	normal	2022-08-05 10:11:35	Finish	2	2	2	2	3	1	2	3	2	2	2	1	2	1	1	1	2	1	3	2
				3 days after delivery	Maternal mental health assessment	Self-rating Anxiety Scale (SAS)	24	2 min	normal	2022-08-05 10:16:38	Finish	2	1	1	1	1	1	1	1	2	1	1	1	1	1	1	3	1	1	1	1
				3 days after delivery	Maternal mental health assessment	Self-rating Anxiety Scale (SAS)	33	2 min	normal	2022-08-05 10:20:10	Finish	1	1	1	1	4	1	1	1	3	1	1	1	4	1	1	2	4	1	2	1
				Early pregnancy	Maternal mental health assessment	Self-rating Anxiety Scale (SAS)	45	3 min	mild	2022-08-05 10:26:38	Finish	2	2	2	1	4	2	2	4	2	3	2	2	4	1	1	3	2	1	3	2
				Early pregnancy	Maternal mental health assessment	Self-rating Anxiety Scale (SAS)	22	3 min	normal	2022-08-05 10:26:47	Finish	1	1	1	1	1	1	1	1	1	1	1	1	1	1	2	1	2	1	1	1
				3 days after delivery	Maternal mental health assessment	Self-rating Anxiety Scale (SAS)	23	2 min	normal	2022-08-05 10:27:50	Finish	1	1	1	1	4	1	1	1	1	1	1	1	1	1	1	1	1	1	1	1
				Early pregnancy	Maternal mental health assessment	Self-rating Anxiety Scale (SAS)	31	2 min	normal	2022-08-05 10:29:24	Finish	1	1	1	1	4	1	1	2	2	2	1	1	2	1	1	1	3	1	2	2
				Early pregnancy	Maternal mental health assessment	Self-rating Anxiety Scale (SAS)	35	5 min	normal	2022-08-05 10:30:47	Finish	1	1	1	1	4	1	1	1	4	1	1	1	4	1	1	1	4	1	4	1
				3 days after delivery	Maternal mental health assessment	Self-rating Anxiety Scale (SAS)	23	3 min	normal	2022-08-05 10:41:05	Finish	1	1	1	1	1	1	1	2	1	1	1	1	1	1	1	2	1	2	1	1
				3 days after delivery	Maternal mental health assessment	Self-rating Anxiety Scale (SAS)	31	4 min	normal	2022-08-05 10:47:59	Finish	2	1	1	1	1	1	2	2	1	1	1	1	1	1	2	2	4	1	3	2
				3 days after delivery	Maternal mental health assessment	Self-rating Anxiety Scale (SAS)	25	2 min	normal	2022-08-05 11:05:38	Finish	1	1	1	1	1	1	1	2	1	1	1	1	4	1	1	1	1	1	2	1
				Early pregnancy	Maternal mental health assessment	Self-rating Anxiety Scale (SAS)	25	4 min	normal	2022-08-05 11:08:19	Finish	2	1	1	1	1	1	2	1	1	2	1	1	1	1	1	2	2	1	1	1
				Early pregnancy	Maternal mental health assessment	Self-rating Anxiety Scale (SAS)	22	2 min	normal	2022-08-05 11:12:28	Finish	1	1	1	1	1	1	1	1	1	1	1	1	1	1	1	2	1	1	1	2
				3 days after delivery	Maternal mental health assessment	Self-rating Anxiety Scale (SAS)	22	2 min	normal	2022-08-05 11:24:10	Finish	1	1	1	1	1	1	1	2	1	1	1	1	1	1	2	1	1	1	1	1
				Early pregnancy	Maternal mental health assessment	Self-rating Anxiety Scale (SAS)	31	1 min	normal	2022-08-05 11:24:13	Finish	1	1	1	1	4	1	1	1	4	1	1	1	4	1	1	2	2	1	1	1
				Early pregnancy	Maternal mental health assessment	Self-rating Anxiety Scale (SAS)	20	3 min	normal	2022-08-05 11:29:48	Finish	1	1	1	1	1	1	1	1	1	1	1	1	1	1	1	1	1	1	1	1
				Early pregnancy	Maternal mental health assessment	Self-rating Anxiety Scale (SAS)	28	2 min	normal	2022-08-05 11:55:19	Finish	1	1	2	1	2	1	2	1	2	2	1	1	2	1	1	2	1	1	2	1
				Early pregnancy	Maternal mental health assessment	Self-rating Anxiety Scale (SAS)	26	2 min	normal	2022-08-05 12:55:27	Finish	2	1	1	1	1	1	1	2	2	1	1	1	1	1	1	2	2	2	1	1
				Early pregnancy	Maternal mental health assessment	Self-rating Anxiety Scale (SAS)	24	4 min	normal	2022-08-05 13:36:35	Finish	1	1	1	1	1	1	1	1	1	1	1	1	1	1	1	2	2	2	2	1
				3 days after delivery	Maternal mental health assessment	Self-rating Anxiety Scale (SAS)	32	2 min	normal	2022-08-05 13:49:36	Finish	1	1	2	1	4	1	1	2	4	1	1	1	1	1	1	1	2	1	4	1
				Early pregnancy	Maternal mental health assessment	Self-rating Anxiety Scale (SAS)	22	2 min	normal	2022-08-05 15:00:18	Finish	1	1	1	1	1	1	1	1	1	1	1	1	1	1	1	2	2	1	1	1
				Early pregnancy	Maternal mental health assessment	Self-rating Anxiety Scale (SAS)	31	2 min	normal	2022-08-05 15:07:25	Finish	1	1	1	1	4	1	1	1	2	2	1	1	4	1	2	2	2	1	1	1
				Early pregnancy	Maternal mental health assessment	Self-rating Anxiety Scale (SAS)	31	1 min	normal	2022-08-05 15:16:32	Finish	1	1	1	1	4	1	1	1	4	1	1	1	1	1	1	2	1	1	2	4
				3 days after delivery	Maternal mental health assessment	Self-rating Anxiety Scale (SAS)	34	2 min	normal	2022-08-05 16:20:35	Finish	2	2	3	1	3	1	1	2	3	2	1	1	1	1	1	1	2	2	2	2
				3 days after delivery	Maternal mental health assessment	Self-rating Anxiety Scale (SAS)	34	3 min	normal	2022-08-05 16:52:01	Finish	2	1	1	1	4	1	1	1	2	1	1	1	4	1	1	1	4	1	4	1
				Early pregnancy	Maternal mental health assessment	Self-rating Anxiety Scale (SAS)	25	2 min	normal	2022-08-05 23:05:53	Finish	1	1	1	1	1	1	1	2	2	1	1	1	1	1	2	2	1	2	1	1
				Early pregnancy	Maternal mental health assessment	Self-rating Anxiety Scale (SAS)	40	2 min	normal	2022-08-06 07:57:38	Finish	1	1	1	1	3	1	2	3	3	2	2	1	4	1	2	2	3	2	3	2
				Early pregnancy	Maternal mental health assessment	Self-rating Anxiety Scale (SAS)	37	2 min	normal	2022-08-06 08:18:21	Finish	2	1	1	1	2	1	4	4	1	1	1	1	2	1	2	4	2	2	2	2
				Mid-pregnancy	Maternal mental health assessment	Self-rating Anxiety Scale (SAS)	29	3 min	normal	2022-08-06 08:21:39	Finish	1	1	2	1	1	1	2	3	2	1	1	1	2	1	1	3	2	1	1	1
				3 days after delivery	Maternal mental health assessment	Self-rating Anxiety Scale (SAS)	20	2 min	normal	2022-08-06 08:31:29	Finish	1	1	1	1	1	1	1	1	1	1	1	1	1	1	1	1	1	1	1	1
				Early pregnancy	Maternal mental health assessment	Self-rating Anxiety Scale (SAS)	34	2 min	normal	2022-08-06 08:32:30	Finish	2	2	1	1	2	1	2	1	2	2	1	1	2	1	3	2	2	3	2	1
				Early pregnancy	Maternal mental health assessment	Self-rating Anxiety Scale (SAS)	29	2 min	normal	2022-08-06 08:53:21	Finish	2	1	1	1	4	1	1	2	2	1	2	1	1	1	2	2	1	1	1	1
				Early pregnancy	Maternal mental health assessment	Self-rating Anxiety Scale (SAS)	34	2 min	normal	2022-08-06 09:01:27	Finish	2	1	2	1	3	1	1	2	2	1	2	1	3	1	2	1	2	2	2	2
				Early pregnancy	Maternal mental health assessment	Self-rating Anxiety Scale (SAS)	27	2 min	normal	2022-08-06 09:09:33	Finish	1	1	1	1	1	1	1	2	1	2	1	1	1	1	1	3	2	2	1	2
				Early pregnancy	Maternal mental health assessment	Self-rating Anxiety Scale (SAS)	35	1 min	normal	2022-08-06 09:10:42	Finish	2	2	2	1	2	1	2	2	2	2	2	1	2	1	1	2	3	1	2	2
				Early pregnancy	Maternal mental health assessment	Self-rating Anxiety Scale (SAS)	23	2 min	normal	2022-08-06 09:14:00	Finish	1	1	1	1	1	1	1	2	1	1	1	1	1	1	2	1	1	1	2	1
				Early pregnancy	Maternal mental health assessment	Self-rating Anxiety Scale (SAS)	23	1 min	normal	2022-08-06 09:19:59	Finish	1	1	1	1	1	1	1	1	2	1	1	1	1	1	1	2	2	1	1	1
				Early pregnancy	Maternal mental health assessment	Self-rating Anxiety Scale (SAS)	26	2 min	normal	2022-08-06 09:23:09	Finish	1	1	1	1	1	1	1	2	1	1	1	1	1	1	2	2	3	1	2	1
				Early pregnancy	Maternal mental health assessment	Self-rating Anxiety Scale (SAS)	25	2 min	normal	2022-08-06 09:23:36	Finish	1	1	1	1	2	1	1	3	1	1	1	1	1	1	3	1	1	1	1	1
				Early pregnancy	Maternal mental health assessment	Self-rating Anxiety Scale (SAS)	31	2 min	normal	2022-08-06 09:28:49	Finish	1	1	1	1	1	1	2	3	2	2	2	1	2	1	3	2	1	1	1	2
				Early pregnancy	Maternal mental health assessment	Self-rating Anxiety Scale (SAS)	24	2 min	normal	2022-08-06 09:37:29	Finish	1	1	1	1	1	1	1	1	2	2	1	1	2	1	1	2	1	1	1	1
				Early pregnancy	Maternal mental health assessment	Self-rating Anxiety Scale (SAS)	24	22 min	normal	2022-08-06 09:56:44	Finish	1	1	1	1	1	1	1	1	2	1	1	1	1	1	1	2	3	1	1	1
				Early pregnancy	Maternal mental health assessment	Self-rating Anxiety Scale (SAS)	20	1 min	normal	2022-08-06 09:58:56	Finish	1	1	1	1	1	1	1	1	1	1	1	1	1	1	1	1	1	1	1	1
				3 days after delivery	Maternal mental health assessment	Self-rating Anxiety Scale (SAS)	21	2 min	normal	2022-08-06 10:03:15	Finish	1	1	1	1	1	1	1	1	1	1	1	1	1	1	1	2	1	1	1	1
				Early pregnancy	Maternal mental health assessment	Self-rating Anxiety Scale (SAS)	30	2 min	normal	2022-08-06 10:07:03	Finish	2	2	2	1	2	1	1	2	2	1	1	1	1	1	1	3	1	1	3	1
				3 days after delivery	Maternal mental health assessment	Self-rating Anxiety Scale (SAS)	24	8 min	normal	2022-08-06 10:08:10	Finish	1	1	1	1	1	1	2	2	1	1	1	1	1	1	1	2	1	1	2	1
				Early pregnancy	Maternal mental health assessment	Self-rating Anxiety Scale (SAS)	36	2 min	normal	2022-08-06 10:25:26	Finish	2	2	2	1	3	1	2	2	4	2	1	1	2	1	1	2	2	2	2	1
				Early pregnancy	Maternal mental health assessment	Self-rating Anxiety Scale (SAS)	25	1 min	normal	2022-08-06 10:25:31	Finish	1	1	1	1	4	1	1	1	1	1	1	1	1	1	1	1	2	1	2	1
				Early pregnancy	Maternal mental health assessment	Self-rating Anxiety Scale (SAS)	37	2 min	normal	2022-08-06 10:26:12	Finish	2	1	2	1	2	1	2	3	2	1	1	1	2	1	4	3	1	2	3	2
				Early pregnancy	Maternal mental health assessment	Self-rating Anxiety Scale (SAS)	26	3 min	normal	2022-08-06 10:29:17	Finish	1	1	1	1	2	1	1	4	1	1	1	1	1	1	1	3	1	1	1	1
				3 days after delivery	Maternal mental health assessment	Self-rating Anxiety Scale (SAS)	35	1 min	normal	2022-08-06 10:41:03	Finish	1	1	1	1	4	1	1	1	4	1	1	1	4	1	1	1	4	1	4	1
				Early pregnancy	Maternal mental health assessment	Self-rating Anxiety Scale (SAS)	29	2 min	normal	2022-08-06 10:41:50	Finish	2	1	1	1	2	1	1	2	2	1	1	1	1	1	3	1	4	1	1	1
				3 days after delivery	Maternal mental health assessment	Self-rating Anxiety Scale (SAS)	35	3 min	normal	2022-08-06 10:44:27	Finish	2	1	1	1	3	1	2	2	2	1	1	2	2	2	1	2	2	2	3	2
				Early pregnancy	Maternal mental health assessment	Self-rating Anxiety Scale (SAS)	28	23 min	normal	2022-08-06 10:44:38	Finish	1	1	1	1	2	1	2	2	2	1	1	1	2	1	1	2	2	1	2	1
				Early pregnancy	Maternal mental health assessment	Self-rating Anxiety Scale (SAS)	22	1 min	normal	2022-08-06 10:47:32	Finish	1	1	1	1	1	1	1	1	1	1	1	1	1	1	1	1	1	3	1	1
				Early pregnancy	Maternal mental health assessment	Self-rating Anxiety Scale (SAS)	33	3 min	normal	2022-08-06 10:49:24	Finish	1	1	1	1	4	1	2	2	2	1	2	1	1	2	2	2	2	2	2	1
				Early pregnancy	Maternal mental health assessment	Self-rating Anxiety Scale (SAS)	27	1 min	normal	2022-08-06 10:57:17	Finish	1	1	1	1	4	1	1	1	4	1	1	1	1	2	1	1	1	1	1	1
				Early pregnancy	Maternal mental health assessment	Self-rating Anxiety Scale (SAS)	28	4 min	normal	2022-08-06 11:08:48	Finish	2	1	1	1	4	1	1	2	2	1	1	1	1	1	1	3	1	1	1	1
				Early pregnancy	Maternal mental health assessment	Self-rating Anxiety Scale (SAS)	23	2 min	normal	2022-08-06 11:14:57	Finish	1	1	1	1	1	1	1	1	1	1	1	1	1	1	1	2	1	2	2	1
				Early pregnancy	Maternal mental health assessment	Self-rating Anxiety Scale (SAS)	33	1 min	normal	2022-08-06 11:29:24	Finish	1	1	1	1	4	1	1	1	4	1	1	1	4	1	1	2	4	1	1	1
				3 days after delivery	Maternal mental health assessment	Self-rating Anxiety Scale (SAS)	25	5 min	normal	2022-08-06 11:36:19	Finish	1	1	1	1	1	1	1	1	1	1	1	1	1	2	1	2	1	1	3	2
				Early pregnancy	Maternal mental health assessment	Self-rating Anxiety Scale (SAS)	43	2 min	mild	2022-08-06 11:45:58	Finish	2	1	3	2	3	1	1	2	3	1	1	1	2	2	3	3	4	1	3	4
				3 days after delivery	Maternal mental health assessment	Self-rating Anxiety Scale (SAS)	36	2 min	normal	2022-08-06 11:50:41	Finish	2	1	2	1	4	1	1	3	3	3	2	2	1	1	1	1	2	1	3	1
				Early pregnancy	Maternal mental health assessment	Self-rating Anxiety Scale (SAS)	49	2 min	mild	2022-08-06 12:58:27	Finish	2	2	2	2	3	1	3	3	2	2	2	2	3	2	3	3	3	2	4	3
				Early pregnancy	Maternal mental health assessment	Self-rating Anxiety Scale (SAS)	48	39 min	mild	2022-08-06 13:35:21	Finish	2	2	2	2	2	1	3	3	2	2	2	2	3	2	3	3	3	2	4	3
				Early pregnancy	Maternal mental health assessment	Self-rating Anxiety Scale (SAS)	28	2 min	normal	2022-08-06 13:37:46	Finish	1	1	1	1	4	1	1	1	2	1	1	1	2	1	1	1	4	1	1	1
				Early pregnancy	Maternal mental health assessment	Self-rating Anxiety Scale (SAS)	34	2 min	normal	2022-08-06 13:38:53	Finish	2	2	2	1	3	1	1	3	3	1	1	1	2	1	4	1	1	1	2	1
				Early pregnancy	Maternal mental health assessment	Self-rating Anxiety Scale (SAS)	37	2 min	normal	2022-08-06 14:25:17	Finish	2	1	1	1	2	1	2	2	2	3	2	2	3	1	1	3	2	3	2	1
				Early pregnancy	Maternal mental health assessment	Self-rating Anxiety Scale (SAS)	21	2 min	normal	2022-08-06 14:40:43	Finish	1	1	1	1	1	1	1	1	1	1	1	1	1	1	1	2	1	1	1	1
				Early pregnancy	Maternal mental health assessment	Self-rating Anxiety Scale (SAS)	37	3 min	normal	2022-08-06 15:06:14	Finish	1	2	1	1	2	1	2	3	2	2	1	1	3	1	3	2	4	1	2	2
				Early pregnancy	Maternal mental health assessment	Self-rating Anxiety Scale (SAS)	24	1 min	normal	2022-08-06 15:18:26	Finish	1	1	1	1	1	1	1	2	2	1	1	1	1	1	1	2	2	1	1	1
				Early pregnancy	Maternal mental health assessment	Self-rating Anxiety Scale (SAS)	24	2 min	normal	2022-08-06 15:29:07	Finish	1	1	1	1	1	1	2	2	1	1	2	1	1	1	2	1	1	1	1	1
				Late pregnancy	Maternal mental health assessment	Self-rating Anxiety Scale (SAS)	34	2 min	normal	2022-08-06 20:22:35	Finish	1	1	1	1	2	1	2	2	3	3	1	2	2	3	1	3	1	1	2	1
				Early pregnancy	Maternal mental health assessment	Self-rating Anxiety Scale (SAS)	33	3 min	normal	2022-08-06 21:29:10	Finish	1	1	1	1	1	1	1	2	2	2	2	2	2	1	3	2	2	1	4	1
				Late pregnancy	Maternal mental health assessment	Self-rating Anxiety Scale (SAS)	44	1 min	mild	2022-08-07 10:20:50	Finish	2	2	2	2	3	2	2	2	3	2	2	2	3	3	2	2	2	1	3	2
				3 days after delivery	Maternal mental health assessment	Self-rating Anxiety Scale (SAS)	35	2 min	normal	2022-08-07 10:25:19	Finish	2	1	1	2	1	1	2	2	3	1	2	1	2	1	1	3	2	1	4	2
				Early pregnancy	Maternal mental health assessment	Self-rating Anxiety Scale (SAS)	32	2 min	normal	2022-08-07 10:26:28	Finish	1	1	1	1	1	2	2	2	1	1	1	1	1	2	2	3	2	2	3	2
				3 days after delivery	Maternal mental health assessment	Self-rating Anxiety Scale (SAS)	30	2 min	normal	2022-08-07 17:22:19	Finish	1	1	1	1	4	1	1	1	2	1	1	1	1	2	1	3	2	1	3	1
				3 days after delivery	Maternal mental health assessment	Self-rating Anxiety Scale (SAS)	25	3 min	normal	2022-08-08 08:53:54	Finish	1	1	1	1	1	1	2	2	1	1	1	1	1	1	1	1	1	2	3	1
				3 days after delivery	Maternal mental health assessment	Self-rating Anxiety Scale (SAS)	27	2 min	normal	2022-08-08 08:55:04	Finish	1	1	1	1	1	1	1	3	1	1	1	1	1	3	1	2	1	1	3	1
				3 days after delivery	Maternal mental health assessment	Self-rating Anxiety Scale (SAS)	36	3 min	normal	2022-08-08 09:21:57	Finish	1	1	1	1	4	1	1	1	4	2	1	1	4	1	1	3	3	1	2	2
				Early pregnancy	Maternal mental health assessment	Self-rating Anxiety Scale (SAS)	28	2 min	normal	2022-08-08 09:22:55	Finish	1	1	1	1	4	1	1	1	1	2	1	1	1	1	2	3	1	1	2	1
				3 days after delivery	Maternal mental health assessment	Self-rating Anxiety Scale (SAS)	37	2 min	normal	2022-08-08 09:26:16	Finish	1	1	1	1	4	1	2	2	2	2	2	1	2	1	2	2	3	3	2	2
				3 days after delivery	Maternal mental health assessment	Self-rating Anxiety Scale (SAS)	20	2 min	normal	2022-08-08 09:32:26	Finish	1	1	1	1	1	1	1	1	1	1	1	1	1	1	1	1	1	1	1	1
				Late pregnancy	Maternal mental health assessment	Self-rating Anxiety Scale (SAS)	39	2 min	normal	2022-08-08 09:39:27	Finish	2	1	1	1	2	1	2	2	2	2	2	1	3	2	2	3	1	3	4	2
				3 days after delivery	Maternal mental health assessment	Self-rating Anxiety Scale (SAS)	24	3 min	normal	2022-08-08 09:49:06	Finish	2	1	1	1	1	1	1	2	1	1	1	1	1	1	1	2	1	1	2	1
				Early pregnancy	Maternal mental health assessment	Self-rating Anxiety Scale (SAS)	41	2 min	normal	2022-08-08 09:50:08	Finish	2	2	3	2	4	1	1	2	3	3	2	2	2	1	2	1	3	1	3	1
				Early pregnancy	Maternal mental health assessment	Self-rating Anxiety Scale (SAS)	30	2 min	normal	2022-08-08 09:52:08	Finish	1	1	1	1	4	1	1	1	1	1	1	1	1	1	3	3	1	2	3	1
				Early pregnancy	Maternal mental health assessment	Self-rating Anxiety Scale (SAS)	30	1 min	normal	2022-08-08 09:53:33	Finish	1	1	1	1	4	1	1	1	2	2	1	1	1	1	1	3	2	2	2	1
				3 days after delivery	Maternal mental health assessment	Self-rating Anxiety Scale (SAS)	31	3 min	normal	2022-08-08 10:02:54	Finish	1	1	1	1	2	1	1	1	2	1	1	1	2	2	1	3	4	1	2	2
				Early pregnancy	Maternal mental health assessment	Self-rating Anxiety Scale (SAS)	36	1 min	normal	2022-08-08 10:13:32	Finish	1	1	1	1	4	1	1	1	4	1	1	2	4	1	1	3	4	1	2	1
				Early pregnancy	Maternal mental health assessment	Self-rating Anxiety Scale (SAS)	29	2 min	normal	2022-08-08 10:14:31	Finish	1	1	1	1	4	1	1	1	1	2	2	1	1	1	2	2	2	1	2	1
				Early pregnancy	Maternal mental health assessment	Self-rating Anxiety Scale (SAS)	35	4 min	normal	2022-08-08 10:17:51	Finish	2	1	1	1	4	1	1	1	4	1	2	1	2	1	1	3	2	2	3	1
				Early pregnancy	Maternal mental health assessment	Self-rating Anxiety Scale (SAS)	24	2 min	normal	2022-08-08 10:20:02	Finish	1	1	1	1	1	1	1	1	1	1	1	1	1	1	1	2	3	2	1	1
				Early pregnancy	Maternal mental health assessment	Self-rating Anxiety Scale (SAS)	33	2 min	normal	2022-08-08 10:32:42	Finish	2	1	2	2	3	1	1	2	2	1	1	2	2	1	2	2	1	1	2	2
				Early pregnancy	Maternal mental health assessment	Self-rating Anxiety Scale (SAS)	28	5 min	normal	2022-08-08 10:36:54	Finish	1	1	1	1	4	1	1	1	2	1	1	1	2	1	2	1	2	1	2	1
				Early pregnancy	Maternal mental health assessment	Self-rating Anxiety Scale (SAS)	32	4 min	normal	2022-08-08 10:43:49	Finish	2	1	1	1	4	1	1	1	2	1	1	1	1	1	1	3	3	2	3	1
				Early pregnancy	Maternal mental health assessment	Self-rating Anxiety Scale (SAS)	31	2 min	normal	2022-08-08 10:55:36	Finish	1	1	1	1	4	1	1	1	4	1	1	1	1	1	1	1	4	1	3	1
				Early pregnancy	Maternal mental health assessment	Self-rating Anxiety Scale (SAS)	28	2 min	normal	2022-08-08 11:04:43	Finish	1	1	1	1	4	1	1	1	2	1	1	1	1	1	2	2	2	2	1	1
				Early pregnancy	Maternal mental health assessment	Self-rating Anxiety Scale (SAS)	33	2 min	normal	2022-08-08 11:06:15	Finish	2	2	2	1	2	1	1	2	2	2	1	1	1	1	1	3	2	2	2	2
				3 days after delivery	Maternal mental health assessment	Self-rating Anxiety Scale (SAS)	24	2 min	normal	2022-08-08 11:10:24	Finish	1	1	1	1	1	1	2	1	1	2	1	1	1	1	1	2	1	1	2	1
				Early pregnancy	Maternal mental health assessment	Self-rating Anxiety Scale (SAS)	39	3 min	normal	2022-08-08 11:14:24	Finish	2	2	2	2	4	2	2	2	1	4	1	1	2	1	1	1	4	1	2	2
				Early pregnancy	Maternal mental health assessment	Self-rating Anxiety Scale (SAS)	35	1 min	normal	2022-08-08 11:15:10	Finish	1	1	1	1	4	1	1	1	4	1	1	1	4	1	1	1	4	1	4	1
				Early pregnancy	Maternal mental health assessment	Self-rating Anxiety Scale (SAS)	34	3 min	normal	2022-08-08 11:38:26	Finish	1	1	1	1	4	1	1	1	4	1	1	1	4	1	1	3	3	1	2	1
				Early pregnancy	Maternal mental health assessment	Self-rating Anxiety Scale (SAS)	30	2 min	normal	2022-08-08 12:42:47	Finish	1	1	2	1	4	1	1	2	4	1	1	1	1	1	1	2	1	1	1	2
				Early pregnancy	Maternal mental health assessment	Self-rating Anxiety Scale (SAS)	38	2 min	normal	2022-08-08 13:31:33	Finish	1	1	2	1	3	1	2	2	2	4	2	1	1	1	1	4	2	3	2	2
				Early pregnancy	Maternal mental health assessment	Self-rating Anxiety Scale (SAS)	24	2 min	normal	2022-08-08 13:38:59	Finish	1	1	1	1	4	1	1	1	1	1	1	1	1	1	1	2	1	1	1	1
				Early pregnancy	Maternal mental health assessment	Self-rating Anxiety Scale (SAS)	29	2 min	normal	2022-08-08 13:45:00	Finish	2	1	2	1	3	1	1	3	2	1	2	1	1	1	1	1	1	1	2	1
				Early pregnancy	Maternal mental health assessment	Self-rating Anxiety Scale (SAS)	33	2 min	normal	2022-08-08 14:16:02	Finish	2	2	1	1	1	2	1	1	2	2	1	2	1	1	3	2	3	3	1	1
				3 days after delivery	Maternal mental health assessment	Self-rating Anxiety Scale (SAS)	20	2 min	normal	2022-08-08 14:30:36	Finish	1	1	1	1	1	1	1	1	1	1	1	1	1	1	1	1	1	1	1	1
				Early pregnancy	Maternal mental health assessment	Self-rating Anxiety Scale (SAS)	29	1 min	normal	2022-08-08 14:48:15	Finish	1	1	1	1	4	1	1	1	4	1	1	1	1	1	1	2	1	2	2	1
				Early pregnancy	Maternal mental health assessment	Self-rating Anxiety Scale (SAS)	39	2 min	normal	2022-08-08 14:52:06	Finish	2	2	2	1	2	1	2	2	2	2	2	1	2	1	2	3	2	3	3	2
				Early pregnancy	Maternal mental health assessment	Self-rating Anxiety Scale (SAS)	43	2 min	mild	2022-08-08 15:03:24	Finish	2	2	2	1	3	2	2	2	2	2	2	3	4	1	2	2	2	2	3	2
				Early pregnancy	Maternal mental health assessment	Self-rating Anxiety Scale (SAS)	31	2 min	normal	2022-08-08 15:12:55	Finish	2	1	1	1	1	1	1	1	1	1	1	2	1	1	3	3	4	1	3	1
				Early pregnancy	Maternal mental health assessment	Self-rating Anxiety Scale (SAS)	28	3 min	normal	2022-08-08 15:27:53	Finish	2	1	1	1	1	1	1	2	2	1	1	1	1	2	3	2	1	1	2	1
				Early pregnancy	Maternal mental health assessment	Self-rating Anxiety Scale (SAS)	39	3 min	normal	2022-08-08 15:37:06	Finish	1	1	1	1	2	1	2	2	2	3	2	2	4	1	4	3	2	1	3	1
				Early pregnancy	Maternal mental health assessment	Self-rating Anxiety Scale (SAS)	31	2 min	normal	2022-08-08 15:42:39	Finish	2	2	2	1	4	1	1	1	1	1	1	1	1	1	3	2	2	1	1	2
				Mid-pregnancy	Maternal mental health assessment	Self-rating Anxiety Scale (SAS)	25	2 min	normal	2022-08-08 15:53:44	Finish	1	1	1	1	4	1	1	1	1	1	1	1	1	1	1	2	1	1	2	1
				Early pregnancy	Maternal mental health assessment	Self-rating Anxiety Scale (SAS)	26	17 min	normal	2022-08-08 16:06:33	Finish	1	1	1	1	1	1	1	1	2	1	1	1	1	1	1	3	3	1	2	1
				3 days after delivery	Maternal mental health assessment	Self-rating Anxiety Scale (SAS)	31	2 min	normal	2022-08-08 18:37:33	Finish	2	2	2	1	2	1	2	2	2	1	1	1	1	1	2	1	2	1	2	2
				Early pregnancy	Maternal mental health assessment	Self-rating Anxiety Scale (SAS)	32	2 min	normal	2022-08-09 07:42:41	Finish	1	1	1	1	4	1	1	1	4	1	1	1	1	1	1	3	1	1	4	2
				Early pregnancy	Maternal mental health assessment	Self-rating Anxiety Scale (SAS)	21	2 min	normal	2022-08-09 08:21:13	Finish	1	1	1	1	1	1	1	1	1	1	1	1	1	1	1	1	2	1	1	1
				Early pregnancy	Maternal mental health assessment	Self-rating Anxiety Scale (SAS)	33	6 min	normal	2022-08-09 08:44:08	Finish	1	1	1	1	4	1	1	1	2	2	1	1	4	1	1	2	2	2	2	2
				Early pregnancy	Maternal mental health assessment	Self-rating Anxiety Scale (SAS)	39	3 min	normal	2022-08-09 09:00:57	Finish	3	2	2	1	4	1	1	3	3	2	2	3	2	1	1	3	1	1	2	1
				Early pregnancy	Maternal mental health assessment	Self-rating Anxiety Scale (SAS)	23	1 min	normal	2022-08-09 09:02:18	Finish	1	1	1	1	4	1	1	1	1	1	1	1	1	1	1	1	1	1	1	1
				Early pregnancy	Maternal mental health assessment	Self-rating Anxiety Scale (SAS)	28	2 min	normal	2022-08-09 09:02:33	Finish	2	1	2	1	1	1	1	1	2	1	1	1	1	1	1	3	2	1	3	1
				Early pregnancy	Maternal mental health assessment	Self-rating Anxiety Scale (SAS)	25	2 min	normal	2022-08-09 09:04:09	Finish	1	1	1	1	1	1	1	1	1	2	1	1	1	1	1	2	3	1	2	1
				3 days after delivery	Maternal mental health assessment	Self-rating Anxiety Scale (SAS)	30	1 min	normal	2022-08-09 09:12:04	Finish	2	1	1	1	4	1	1	1	4	1	1	1	4	1	1	1	1	1	1	1
				3 days after delivery	Maternal mental health assessment	Self-rating Anxiety Scale (SAS)	40	2 min	normal	2022-08-09 09:16:18	Finish	2	2	2	1	4	2	2	3	4	1	1	1	1	1	1	3	2	1	4	2
				Early pregnancy	Maternal mental health assessment	Self-rating Anxiety Scale (SAS)	26	3 min	normal	2022-08-09 09:16:39	Finish	2	1	1	1	1	1	1	2	1	1	1	1	1	1	1	3	1	1	3	1
				3 days after delivery	Maternal mental health assessment	Self-rating Anxiety Scale (SAS)	45	1 min	mild	2022-08-09 09:27:26	Finish	2	2	2	2	3	2	2	2	3	2	2	2	3	2	2	2	3	2	3	2
				Early pregnancy	Maternal mental health assessment	Self-rating Anxiety Scale (SAS)	28	12 min	normal	2022-08-09 09:28:17	Finish	1	1	1	1	2	1	1	1	2	1	1	1	2	1	2	2	3	1	2	1
				Early pregnancy	Maternal mental health assessment	Self-rating Anxiety Scale (SAS)	29	2 min	normal	2022-08-09 09:28:42	Finish	1	1	1	1	2	1	1	1	2	1	2	2	2	1	3	3	1	1	1	1
				Early pregnancy	Maternal mental health assessment	Self-rating Anxiety Scale (SAS)	34	2 min	normal	2022-08-09 09:29:09	Finish	2	1	1	1	4	1	1	2	3	2	1	1	2	1	2	3	2	1	1	2
				Early pregnancy	Maternal mental health assessment	Self-rating Anxiety Scale (SAS)	36	1 min	normal	2022-08-09 09:32:12	Finish	1	2	2	1	4	1	1	1	4	1	1	1	4	1	1	2	4	1	2	1
				Early pregnancy	Maternal mental health assessment	Self-rating Anxiety Scale (SAS)	28	2 min	normal	2022-08-09 09:37:53	Finish	2	1	1	1	1	1	2	2	1	2	1	1	1	1	1	3	1	2	2	1
				Early pregnancy	Maternal mental health assessment	Self-rating Anxiety Scale (SAS)	20	2 min	normal	2022-08-09 09:46:16	Finish	1	1	1	1	1	1	1	1	1	1	1	1	1	1	1	1	1	1	1	1
				3 days after delivery	Maternal mental health assessment	Self-rating Anxiety Scale (SAS)	28	2 min	normal	2022-08-09 10:00:35	Finish	1	1	1	1	2	1	1	1	2	1	1	1	2	1	2	1	2	2	3	1
				Early pregnancy	Maternal mental health assessment	Self-rating Anxiety Scale (SAS)	35	1 min	normal	2022-08-09 10:01:47	Finish	1	1	1	1	4	1	1	1	4	1	1	1	4	1	1	1	4	1	4	1
				Early pregnancy	Maternal mental health assessment	Self-rating Anxiety Scale (SAS)	44	4 min	mild	2022-08-09 10:05:38	Finish	2	2	2	1	2	1	2	3	2	2	2	2	2	2	2	3	3	3	3	3
				Early pregnancy	Maternal mental health assessment	Self-rating Anxiety Scale (SAS)	28	1 min	normal	2022-08-09 10:17:46	Finish	1	1	1	1	3	1	1	1	4	1	1	1	4	1	1	1	1	1	1	1
				Early pregnancy	Maternal mental health assessment	Self-rating Anxiety Scale (SAS)	25	15 min	normal	2022-08-09 10:18:37	Finish	1	1	1	1	1	1	1	2	4	1	1	1	1	1	1	1	2	1	1	1
				Early pregnancy	Maternal mental health assessment	Self-rating Anxiety Scale (SAS)	38	1 min	normal	2022-08-09 10:28:19	Finish	1	1	1	1	1	1	1	1	1	4	4	1	4	1	4	2	4	2	2	1
				Early pregnancy	Maternal mental health assessment	Self-rating Anxiety Scale (SAS)	27	1 min	normal	2022-08-09 10:37:22	Finish	1	1	1	1	1	1	1	2	1	1	1	1	1	1	4	2	1	1	3	1
				3 days after delivery	Maternal mental health assessment	Self-rating Anxiety Scale (SAS)	26	2 min	normal	2022-08-09 10:55:48	Finish	1	1	1	1	1	1	1	1	2	1	1	1	2	1	1	2	2	1	3	1
				Mid-pregnancy	Maternal mental health assessment	Self-rating Anxiety Scale (SAS)	40	1 min	normal	2022-08-09 11:04:10	Finish	2	2	2	2	3	2	1	1	4	2	1	1	4	1	1	1	4	1	4	1
				Mid-pregnancy	Maternal mental health assessment	Self-rating Anxiety Scale (SAS)	26	2 min	normal	2022-08-09 11:39:17	Finish	1	1	1	1	4	1	1	1	2	1	1	2	1	1	1	2	1	1	1	1
				3 days after delivery	Maternal mental health assessment	Self-rating Anxiety Scale (SAS)	27	3 min	normal	2022-08-09 11:57:56	Finish	1	1	1	1	2	1	1	2	2	2	1	1	1	1	1	3	2	1	1	1
				Early pregnancy	Maternal mental health assessment	Self-rating Anxiety Scale (SAS)	28	2 min	normal	2022-08-09 12:15:54	Finish	1	1	1	1	1	1	1	2	1	1	1	4	1	1	1	3	2	2	1	1
				Late pregnancy	Maternal mental health assessment	Self-rating Anxiety Scale (SAS)	26	1 min	normal	2022-08-09 12:18:46	Finish	1	1	1	1	2	1	1	2	2	1	1	1	1	1	1	2	2	1	2	1
				Early pregnancy	Maternal mental health assessment	Self-rating Anxiety Scale (SAS)	26	3 min	normal	2022-08-09 12:35:23	Finish	1	1	1	1	1	1	2	1	4	1	1	1	1	1	1	3	1	1	1	1
				Early pregnancy	Maternal mental health assessment	Self-rating Anxiety Scale (SAS)	25	2 min	normal	2022-08-09 13:02:45	Finish	2	1	1	1	1	1	1	2	1	2	1	1	1	1	2	2	1	1	1	1
				Early pregnancy	Maternal mental health assessment	Self-rating Anxiety Scale (SAS)	40	2 min	normal	2022-08-09 13:04:13	Finish	2	2	2	2	2	1	2	2	2	2	2	3	2	1	1	3	2	2	3	2
				Early pregnancy	Maternal mental health assessment	Self-rating Anxiety Scale (SAS)	37	2 min	normal	2022-08-09 14:11:30	Finish	2	2	2	1	4	1	1	2	2	2	1	1	2	1	2	3	2	2	3	1
				Early pregnancy	Maternal mental health assessment	Self-rating Anxiety Scale (SAS)	35	2 min	normal	2022-08-09 14:22:58	Finish	2	1	1	1	2	2	1	1	1	2	2	2	4	1	1	3	4	1	2	1
				Early pregnancy	Maternal mental health assessment	Self-rating Anxiety Scale (SAS)	33	2 min	normal	2022-08-09 15:45:45	Finish	2	2	2	1	1	1	1	2	1	3	1	1	1	1	1	4	1	1	3	3
				3 days after delivery	Maternal mental health assessment	Self-rating Anxiety Scale (SAS)	28	38 min	normal	2022-08-09 18:42:27	Finish	1	1	2	1	2	1	1	2	2	1	1	1	1	1	1	3	1	1	2	2
				Early pregnancy	Maternal mental health assessment	Self-rating Anxiety Scale (SAS)	32	3 min	normal	2022-08-09 19:37:05	Finish	1	1	1	1	2	1	1	2	2	2	1	2	2	1	2	2	3	1	2	2
				Early pregnancy	Maternal mental health assessment	Self-rating Anxiety Scale (SAS)	32	2 min	normal	2022-08-10 07:55:54	Finish	1	1	1	1	1	1	2	3	3	1	2	2	2	1	3	2	1	1	2	1
				Early pregnancy	Maternal mental health assessment	Self-rating Anxiety Scale (SAS)	24	2 min	normal	2022-08-10 08:22:34	Finish	1	1	1	1	1	1	1	2	1	1	1	1	2	1	1	2	1	1	2	1
				Early pregnancy	Maternal mental health assessment	Self-rating Anxiety Scale (SAS)	37	2 min	normal	2022-08-10 08:22:55	Finish	2	2	2	1	4	1	1	1	4	1	1	1	4	1	1	2	4	1	2	1
				Early pregnancy	Maternal mental health assessment	Self-rating Anxiety Scale (SAS)	27	2 min	normal	2022-08-10 08:44:59	Finish	2	1	1	1	2	1	1	2	2	1	1	1	1	1	2	2	1	1	2	1
				Early pregnancy	Maternal mental health assessment	Self-rating Anxiety Scale (SAS)	33	2 min	normal	2022-08-10 08:45:50	Finish	2	1	1	1	4	1	1	2	2	1	1	1	4	1	2	2	2	1	2	1
				Early pregnancy	Maternal mental health assessment	Self-rating Anxiety Scale (SAS)	26	2 min	normal	2022-08-10 08:54:51	Finish	1	1	1	1	2	1	1	1	2	1	1	1	1	1	1	3	2	1	2	1
				Early pregnancy	Maternal mental health assessment	Self-rating Anxiety Scale (SAS)	30	2 min	normal	2022-08-10 08:58:11	Finish	1	1	1	1	1	1	1	2	2	1	1	1	2	1	3	3	1	2	2	2
				Early pregnancy	Maternal mental health assessment	Self-rating Anxiety Scale (SAS)	31	2 min	normal	2022-08-10 09:19:19	Finish	1	1	1	1	4	1	1	1	2	2	1	1	1	1	1	3	2	2	3	1
				Early pregnancy	Maternal mental health assessment	Self-rating Anxiety Scale (SAS)	31	2 min	normal	2022-08-10 09:26:47	Finish	1	1	1	1	4	1	1	2	2	1	2	1	1	1	2	3	2	1	2	1
				Mid-pregnancy	Maternal mental health assessment	Self-rating Anxiety Scale (SAS)	29	2 min	normal	2022-08-10 09:31:53	Finish	1	1	1	1	4	1	1	1	4	1	1	1	1	1	1	2	2	1	2	1
				Early pregnancy	Maternal mental health assessment	Self-rating Anxiety Scale (SAS)	31	3 min	normal	2022-08-10 09:51:04	Finish	1	1	2	1	2	1	1	2	2	2	2	1	2	1	2	1	2	1	3	1
				Early pregnancy	Maternal mental health assessment	Self-rating Anxiety Scale (SAS)	33	2 min	normal	2022-08-10 09:54:41	Finish	1	1	1	1	4	1	2	1	4	2	2	1	1	1	1	2	1	1	3	2
				Early pregnancy	Maternal mental health assessment	Self-rating Anxiety Scale (SAS)	40	2 min	normal	2022-08-10 09:55:52	Finish	3	2	2	1	3	2	1	3	3	2	1	1	2	1	3	2	3	1	2	2
				Late pregnancy	Maternal mental health assessment	Self-rating Anxiety Scale (SAS)	27	3 min	normal	2022-08-10 10:01:22	Finish	1	1	1	1	1	1	1	1	3	2	1	1	1	2	1	2	3	1	1	1
				Early pregnancy	Maternal mental health assessment	Self-rating Anxiety Scale (SAS)	29	2 min	normal	2022-08-10 10:08:02	Finish	1	1	1	1	4	1	1	1	4	1	1	1	1	1	1	1	4	1	1	1
				Late pregnancy	Maternal mental health assessment	Self-rating Anxiety Scale (SAS)	37	3 min	normal	2022-08-10 10:08:10	Finish	1	1	1	1	2	1	2	3	3	2	1	1	4	1	1	3	3	1	3	2
				Early pregnancy	Maternal mental health assessment	Self-rating Anxiety Scale (SAS)	32	2 min	normal	2022-08-10 10:10:41	Finish	1	1	1	1	4	1	1	1	2	2	1	1	2	1	2	2	4	1	1	2
				Early pregnancy	Maternal mental health assessment	Self-rating Anxiety Scale (SAS)	21	7 min	normal	2022-08-10 10:19:56	Finish	1	1	1	1	1	1	1	1	1	1	1	1	1	1	1	2	1	1	1	1
				Late pregnancy	Maternal mental health assessment	Self-rating Anxiety Scale (SAS)	34	6 min	normal	2022-08-10 10:20:57	Finish	1	1	1	1	1	2	2	2	2	1	2	1	1	1	1	3	4	1	2	4
				3 days after delivery	Maternal mental health assessment	Self-rating Anxiety Scale (SAS)	39	13 min	normal	2022-08-10 10:32:07	Finish	2	2	2	2	2	1	2	3	2	2	2	1	2	1	2	3	3	2	2	1
				Early pregnancy	Maternal mental health assessment	Self-rating Anxiety Scale (SAS)	39	3 min	normal	2022-08-10 10:34:46	Finish	2	1	1	1	4	1	1	1	4	2	2	2	4	1	1	2	4	1	2	2
				Early pregnancy	Maternal mental health assessment	Self-rating Anxiety Scale (SAS)	23	2 min	normal	2022-08-10 10:47:37	Finish	1	1	1	1	1	1	1	2	1	1	1	1	1	1	2	2	1	1	1	1
				3 days after delivery	Maternal mental health assessment	Self-rating Anxiety Scale (SAS)	42	2 min	normal	2022-08-10 11:03:09	Finish	2	2	2	1	3	2	2	2	3	2	1	2	2	2	3	3	2	2	2	2
				Early pregnancy	Maternal mental health assessment	Self-rating Anxiety Scale (SAS)	29	2 min	normal	2022-08-10 11:04:06	Finish	1	1	1	1	2	1	2	1	2	1	1	1	2	1	1	3	2	2	2	1
				Early pregnancy	Maternal mental health assessment	Self-rating Anxiety Scale (SAS)	27	33 min	normal	2022-08-10 11:43:31	Finish	--	--	--	--	4	1	1	2	3	1	1	1	2	1	1	2	2	1	2	2
				Early pregnancy	Maternal mental health assessment	Self-rating Anxiety Scale (SAS)	34	2 min	normal	2022-08-10 12:04:07	Finish	1	1	1	1	4	1	1	1	4	1	1	1	4	1	1	2	3	1	3	1
				Early pregnancy	Maternal mental health assessment	Self-rating Anxiety Scale (SAS)	36	2 min	normal	2022-08-10 13:44:08	Finish	1	2	2	1	4	1	1	1	4	1	1	1	4	1	1	2	4	1	2	1
				Late pregnancy	Maternal mental health assessment	Self-rating Anxiety Scale (SAS)	29	2 min	normal	2022-08-10 13:45:08	Finish	1	1	1	1	1	1	1	1	4	1	1	1	1	2	1	3	1	1	3	2
				Early pregnancy	Maternal mental health assessment	Self-rating Anxiety Scale (SAS)	31	2 min	normal	2022-08-10 14:36:28	Finish	2	2	2	1	1	1	1	3	1	2	1	2	1	1	2	2	1	2	2	1
				Early pregnancy	Maternal mental health assessment	Self-rating Anxiety Scale (SAS)	31	2 min	normal	2022-08-10 14:44:11	Finish	2	1	1	1	1	1	1	2	3	2	1	1	1	1	3	2	3	1	2	1
				Early pregnancy	Maternal mental health assessment	Self-rating Anxiety Scale (SAS)	20	4 min	normal	2022-08-10 14:49:37	Finish	1	1	1	1	1	1	1	1	1	1	1	1	1	1	1	1	1	1	1	1
				Early pregnancy	Maternal mental health assessment	Self-rating Anxiety Scale (SAS)	47	1 min	mild	2022-08-10 15:22:14	Finish	2	2	2	2	4	1	1	2	2	3	4	3	3	1	4	2	2	3	2	2
				Early pregnancy	Maternal mental health assessment	Self-rating Anxiety Scale (SAS)	33	4 min	normal	2022-08-10 15:45:11	Finish	2	1	1	1	4	1	1	2	3	1	1	1	1	1	1	2	3	2	3	1
				Early pregnancy	Maternal mental health assessment	Self-rating Anxiety Scale (SAS)	39	3 min	normal	2022-08-10 16:06:04	Finish	3	3	3	3	3	1	1	2	3	3	2	1	2	1	2	1	2	1	1	1
				Mid-pregnancy	Maternal mental health assessment	Self-rating Anxiety Scale (SAS)	55	2 min	中度	2022-08-10 21:33:53	Finish	4	4	3	3	3	2	1	3	3	3	2	3	2	1	3	3	3	3	3	3
				Early pregnancy	Maternal mental health assessment	Self-rating Anxiety Scale (SAS)	33	1 min	normal	2022-08-11 07:59:52	Finish	1	1	1	1	4	1	1	1	4	1	1	1	4	1	1	1	4	1	2	1
				Early pregnancy	Maternal mental health assessment	Self-rating Anxiety Scale (SAS)	28	1 min	normal	2022-08-11 08:08:41	Finish	1	1	1	1	2	1	1	2	2	2	1	1	2	1	2	2	1	1	2	1
				Early pregnancy	Maternal mental health assessment	Self-rating Anxiety Scale (SAS)	28	5 min	normal	2022-08-11 08:25:07	Finish	2	1	1	1	2	1	1	1	1	1	1	1	4	1	1	2	2	2	1	1
				Early pregnancy	Maternal mental health assessment	Self-rating Anxiety Scale (SAS)	27	1 min	normal	2022-08-11 08:26:37	Finish	1	1	1	1	2	1	1	1	2	1	1	1	2	1	1	2	2	1	3	1
				Early pregnancy	Maternal mental health assessment	Self-rating Anxiety Scale (SAS)	20	1 min	normal	2022-08-11 08:46:30	Finish	1	1	1	1	1	1	1	1	1	1	1	1	1	1	1	1	1	1	1	1
				Early pregnancy	Maternal mental health assessment	Self-rating Anxiety Scale (SAS)	33	12 min	normal	2022-08-11 08:53:44	Finish	1	2	2	1	4	1	1	1	1	1	2	1	1	1	2	3	3	1	3	1
				Early pregnancy	Maternal mental health assessment	Self-rating Anxiety Scale (SAS)	33	2 min	normal	2022-08-11 09:01:49	Finish	1	1	1	1	2	1	2	2	2	2	2	1	2	1	2	2	2	1	3	2
				Early pregnancy	Maternal mental health assessment	Self-rating Anxiety Scale (SAS)	35	2 min	normal	2022-08-11 09:07:31	Finish	2	2	1	1	4	1	1	2	2	2	1	1	1	1	2	2	2	3	2	2
				Early pregnancy	Maternal mental health assessment	Self-rating Anxiety Scale (SAS)	30	2 min	normal	2022-08-11 09:07:41	Finish	1	1	1	1	4	1	1	1	1	2	1	1	1	1	1	3	4	1	2	1
				Early pregnancy	Maternal mental health assessment	Self-rating Anxiety Scale (SAS)	34	2 min	normal	2022-08-11 09:11:22	Finish	2	2	1	1	3	1	2	2	2	2	1	1	2	1	1	2	2	2	3	1
				Early pregnancy	Maternal mental health assessment	Self-rating Anxiety Scale (SAS)	31	4 min	normal	2022-08-11 09:27:08	Finish	1	1	1	1	4	1	1	3	2	1	1	1	1	1	2	2	2	1	3	1
				Early pregnancy	Maternal mental health assessment	Self-rating Anxiety Scale (SAS)	25	2 min	normal	2022-08-11 09:29:04	Finish	1	1	1	1	1	1	1	1	1	1	1	1	1	1	1	2	4	1	1	2
				Early pregnancy	Maternal mental health assessment	Self-rating Anxiety Scale (SAS)	24	2 min	normal	2022-08-11 09:29:30	Finish	1	1	1	1	1	1	1	2	1	1	1	1	1	1	1	3	1	2	1	1
				Early pregnancy	Maternal mental health assessment	Self-rating Anxiety Scale (SAS)	34	2 min	normal	2022-08-11 09:31:36	Finish	2	1	2	1	2	1	1	1	3	1	1	1	2	1	2	3	2	2	3	2
				Early pregnancy	Maternal mental health assessment	Self-rating Anxiety Scale (SAS)	25	2 min	normal	2022-08-11 09:32:24	Finish	1	1	1	1	1	1	1	1	1	1	1	1	1	1	1	2	1	2	4	1
				Early pregnancy	Maternal mental health assessment	Self-rating Anxiety Scale (SAS)	38	4 min	normal	2022-08-11 09:35:06	Finish	1	1	1	1	3	1	2	2	3	1	2	1	4	2	1	3	3	2	2	2
				Early pregnancy	Maternal mental health assessment	Self-rating Anxiety Scale (SAS)	25	5 min	normal	2022-08-11 09:38:34	Finish	1	1	1	1	1	1	1	1	1	1	2	2	1	1	1	2	1	1	3	1
				Early pregnancy	Maternal mental health assessment	Self-rating Anxiety Scale (SAS)	29	17 min	normal	2022-08-11 09:48:51	Finish	1	1	1	1	2	1	1	3	2	1	1	1	2	1	1	2	2	2	2	1
				Early pregnancy	Maternal mental health assessment	Self-rating Anxiety Scale (SAS)	32	3 min	normal	2022-08-11 09:49:14	Finish	1	1	1	1	1	1	2	3	1	2	1	1	1	1	3	3	3	1	3	1
				Early pregnancy	Maternal mental health assessment	Self-rating Anxiety Scale (SAS)	23	3 min	normal	2022-08-11 09:59:48	Finish	1	1	1	1	1	1	1	1	4	1	1	1	1	1	1	1	1	1	1	1
				3 days after delivery	Maternal mental health assessment	Self-rating Anxiety Scale (SAS)	29	3 min	normal	2022-08-11 10:08:00	Finish	2	1	1	1	4	1	1	1	2	1	1	1	1	1	1	3	2	1	2	1
				Early pregnancy	Maternal mental health assessment	Self-rating Anxiety Scale (SAS)	37	2 min	normal	2022-08-11 10:08:07	Finish	2	2	2	2	3	1	1	2	2	2	1	1	2	1	3	2	2	2	2	2
				Early pregnancy	Maternal mental health assessment	Self-rating Anxiety Scale (SAS)	33	2 min	normal	2022-08-11 10:11:04	Finish	2	2	2	1	4	1	1	3	2	2	1	1	1	1	2	2	2	1	1	1
				3 days after delivery	Maternal mental health assessment	Self-rating Anxiety Scale (SAS)	29	2 min	normal	2022-08-11 10:12:48	Finish	1	1	1	1	2	1	2	2	2	1	1	1	2	1	2	2	1	1	2	2
				Early pregnancy	Maternal mental health assessment	Self-rating Anxiety Scale (SAS)	34	2 min	normal	2022-08-11 10:13:04	Finish	1	1	1	1	3	1	1	2	2	2	1	1	3	1	2	3	2	2	3	1
				Early pregnancy	Maternal mental health assessment	Self-rating Anxiety Scale (SAS)	29	2 min	normal	2022-08-11 16:18:36	Finish	1	1	1	1	4	1	1	1	4	1	1	1	2	1	1	1	2	1	2	1
				3 days after delivery	Maternal mental health assessment	Self-rating Anxiety Scale (SAS)	26	2 min	normal	2022-08-11 16:24:35	Finish	1	1	1	1	1	1	1	1	2	1	1	1	2	1	1	2	2	1	3	1
				Early pregnancy	Maternal mental health assessment	Self-rating Anxiety Scale (SAS)	26	2 min	normal	2022-08-12 07:53:10	Finish	1	1	1	1	1	1	1	1	1	1	1	1	4	1	1	1	4	1	1	1
				Early pregnancy	Maternal mental health assessment	Self-rating Anxiety Scale (SAS)	29	1 min	normal	2022-08-12 07:55:26	Finish	1	1	1	1	2	1	1	1	2	2	1	1	2	2	1	3	2	1	2	1
				Early pregnancy	Maternal mental health assessment	Self-rating Anxiety Scale (SAS)	28	1 min	normal	2022-08-12 07:57:05	Finish	1	1	1	1	1	1	1	1	1	1	1	1	4	1	1	3	2	1	2	2
				Early pregnancy	Maternal mental health assessment	Self-rating Anxiety Scale (SAS)	31	4 min	normal	2022-08-12 08:04:36	Finish	1	1	1	1	4	1	1	1	4	1	1	1	4	1	1	1	2	1	2	1
				Late pregnancy	Maternal mental health assessment	Self-rating Anxiety Scale (SAS)	35	1 min	normal	2022-08-12 08:11:31	Finish	1	1	1	1	1	1	2	2	1	2	2	2	2	2	2	3	2	2	3	2
				Early pregnancy	Maternal mental health assessment	Self-rating Anxiety Scale (SAS)	52	1 min	中度	2022-08-12 08:36:04	Finish	3	2	2	2	3	2	3	3	2	3	3	3	2	3	3	3	4	2	2	2
				Early pregnancy	Maternal mental health assessment	Self-rating Anxiety Scale (SAS)	24	2 min	normal	2022-08-12 09:00:25	Finish	2	1	1	1	4	1	1	1	1	1	1	1	1	1	1	1	1	1	1	1
				Early pregnancy	Maternal mental health assessment	Self-rating Anxiety Scale (SAS)	23	2 min	normal	2022-08-12 09:01:42	Finish	1	1	1	1	1	1	1	2	1	1	1	1	3	1	1	1	1	1	1	1
				Early pregnancy	Maternal mental health assessment	Self-rating Anxiety Scale (SAS)	30	2 min	normal	2022-08-12 09:03:35	Finish	1	1	1	1	2	2	1	3	2	2	1	2	1	1	3	2	1	1	1	1
				3 days after delivery	Maternal mental health assessment	Self-rating Anxiety Scale (SAS)	42	2 min	normal	2022-08-12 09:08:48	Finish	2	2	2	2	3	2	2	2	2	2	2	2	2	2	2	3	2	2	2	2
				Early pregnancy	Maternal mental health assessment	Self-rating Anxiety Scale (SAS)	30	34 min	normal	2022-08-12 09:09:30	Finish	1	1	1	1	1	1	1	2	1	1	3	2	3	1	2	1	1	2	2	2
				3 days after delivery	Maternal mental health assessment	Self-rating Anxiety Scale (SAS)	25	2 min	normal	2022-08-12 09:09:57	Finish	1	1	1	1	1	1	1	1	2	1	1	1	1	1	2	3	1	1	2	1
				Early pregnancy	Maternal mental health assessment	Self-rating Anxiety Scale (SAS)	28	3 min	normal	2022-08-12 09:15:04	Finish	1	1	1	1	4	1	1	1	2	1	1	1	1	1	1	2	2	1	2	2
				Early pregnancy	Maternal mental health assessment	Self-rating Anxiety Scale (SAS)	28	2 min	normal	2022-08-12 09:17:02	Finish	2	1	2	1	1	1	2	2	1	1	1	1	1	1	1	2	1	1	3	2
				Early pregnancy	Maternal mental health assessment	Self-rating Anxiety Scale (SAS)	36	2 min	normal	2022-08-12 09:28:21	Finish	1	1	2	1	4	1	2	3	2	2	2	2	2	1	2	2	2	1	2	1
				Early pregnancy	Maternal mental health assessment	Self-rating Anxiety Scale (SAS)	31	11 min	normal	2022-08-12 09:35:01	Finish	2	1	1	1	2	1	2	1	2	2	2	1	1	1	3	2	1	2	2	1
				3 days after delivery	Maternal mental health assessment	Self-rating Anxiety Scale (SAS)	35	3 min	normal	2022-08-12 09:36:00	Finish	1	1	1	1	4	1	1	1	4	1	1	1	4	1	1	1	4	1	4	1
				Early pregnancy	Maternal mental health assessment	Self-rating Anxiety Scale (SAS)	27	42 min	normal	2022-08-12 09:39:17	Finish	1	1	1	1	4	1	1	1	2	1	1	1	1	1	1	2	2	1	2	1
				Early pregnancy	Maternal mental health assessment	Self-rating Anxiety Scale (SAS)	31	2 min	normal	2022-08-12 09:39:35	Finish	2	1	1	1	1	1	2	1	1	1	1	1	1	2	2	3	3	2	2	2
				Mid-pregnancy	Maternal mental health assessment	Self-rating Anxiety Scale (SAS)	28	10 min	normal	2022-08-12 09:45:02	Finish	1	1	1	1	4	1	1	2	4	1	1	1	1	1	1	1	1	1	2	1
				3 days after delivery	Maternal mental health assessment	Self-rating Anxiety Scale (SAS)	35	1 min	normal	2022-08-12 09:51:10	Finish	1	1	1	1	4	1	1	1	4	1	1	1	4	1	1	1	4	1	4	1
				3 days after delivery	Maternal mental health assessment	Self-rating Anxiety Scale (SAS)	20	2 min	normal	2022-08-12 09:54:28	Finish	1	1	1	1	1	1	1	1	1	1	1	1	1	1	1	1	1	1	1	1
				Mid-pregnancy	Maternal mental health assessment	Self-rating Anxiety Scale (SAS)	28	3 min	normal	2022-08-12 09:54:56	Finish	1	1	1	1	4	1	1	1	2	1	1	1	1	1	1	2	2	1	2	2
				Early pregnancy	Maternal mental health assessment	Self-rating Anxiety Scale (SAS)	32	1 min	normal	2022-08-12 10:09:49	Finish	1	1	1	1	4	1	1	1	4	2	1	1	2	1	1	3	1	1	3	1
				3 days after delivery	Maternal mental health assessment	Self-rating Anxiety Scale (SAS)	22	2 min	normal	2022-08-12 10:09:56	Finish	1	1	1	1	1	1	1	1	1	1	1	1	1	1	1	1	2	1	2	1
				Late pregnancy	Maternal mental health assessment	Self-rating Anxiety Scale (SAS)	34	3 min	normal	2022-08-12 10:17:51	Finish	2	1	1	1	4	1	2	2	2	1	1	1	1	2	1	3	2	1	3	2
				3 days after delivery	Maternal mental health assessment	Self-rating Anxiety Scale (SAS)	24	2 min	normal	2022-08-12 10:22:12	Finish	1	1	1	1	1	1	1	1	1	1	1	1	1	1	1	2	1	1	4	1
				Early pregnancy	Maternal mental health assessment	Self-rating Anxiety Scale (SAS)	31	2 min	normal	2022-08-12 10:30:08	Finish	1	1	1	1	4	1	2	3	1	1	1	1	2	1	2	3	2	1	1	1
				Early pregnancy	Maternal mental health assessment	Self-rating Anxiety Scale (SAS)	28	2 min	normal	2022-08-12 10:30:43	Finish	1	1	1	1	4	1	1	1	4	2	1	1	1	1	1	1	1	1	2	1
				Early pregnancy	Maternal mental health assessment	Self-rating Anxiety Scale (SAS)	30	2 min	normal	2022-08-12 10:30:44	Finish	2	1	1	1	2	1	1	1	2	1	1	1	4	1	1	2	2	1	2	2
				Early pregnancy	Maternal mental health assessment	Self-rating Anxiety Scale (SAS)	38	1 min	normal	2022-08-12 10:33:01	Finish	2	1	2	1	4	1	1	1	4	1	1	1	4	1	1	2	2	1	4	3
				3 days after delivery	Maternal mental health assessment	Self-rating Anxiety Scale (SAS)	26	3 min	normal	2022-08-12 10:57:11	Finish	1	1	1	1	4	1	1	1	1	1	1	1	1	1	1	1	4	1	1	1
				Early pregnancy	Maternal mental health assessment	Self-rating Anxiety Scale (SAS)	36	1 min	normal	2022-08-12 11:04:55	Finish	1	1	1	1	4	1	1	1	4	1	1	1	4	1	1	2	4	3	2	1
				Early pregnancy	Maternal mental health assessment	Self-rating Anxiety Scale (SAS)	35	6 min	normal	2022-08-12 11:05:37	Finish	1	1	1	1	4	1	1	1	4	1	1	1	4	1	1	2	4	1	2	2
				Early pregnancy	Maternal mental health assessment	Self-rating Anxiety Scale (SAS)	25	19 min	normal	2022-08-12 11:34:47	Finish	1	1	1	1	1	1	1	2	1	2	1	1	2	1	1	2	2	1	1	1
				3 days after delivery	Maternal mental health assessment	Self-rating Anxiety Scale (SAS)	26	3 min	normal	2022-08-12 12:42:18	Finish	1	1	1	1	1	1	1	2	2	1	1	1	1	1	1	2	1	1	3	2
				Early pregnancy	Maternal mental health assessment	Self-rating Anxiety Scale (SAS)	40	5 min	normal	2022-08-12 14:24:54	Finish	2	1	1	1	4	1	2	2	3	2	1	2	2	2	1	3	1	4	3	2
				Early pregnancy	Maternal mental health assessment	Self-rating Anxiety Scale (SAS)	31	2 min	normal	2022-08-12 14:26:20	Finish	1	1	1	1	2	1	1	2	2	1	1	1	4	1	1	1	4	1	2	2
				Early pregnancy	Maternal mental health assessment	Self-rating Anxiety Scale (SAS)	32	2 min	normal	2022-08-12 16:22:17	Finish	2	1	2	1	1	1	1	2	2	2	1	1	1	2	2	3	2	1	2	2
				Early pregnancy	Maternal mental health assessment	Self-rating Anxiety Scale (SAS)	39	1 min	normal	2022-08-13 07:48:14	Finish	2	2	2	1	4	1	1	3	3	1	1	1	4	1	1	2	4	1	3	1
				Early pregnancy	Maternal mental health assessment	Self-rating Anxiety Scale (SAS)	33	2 min	normal	2022-08-13 07:50:27	Finish	2	2	2	1	3	1	1	2	3	2	1	1	1	1	1	1	3	2	2	1
				Early pregnancy	Maternal mental health assessment	Self-rating Anxiety Scale (SAS)	35	6 min	normal	2022-08-13 07:55:51	Finish	1	1	1	1	4	1	2	1	4	1	1	1	4	1	1	3	2	1	3	1
				Early pregnancy	Maternal mental health assessment	Self-rating Anxiety Scale (SAS)	26	2 min	normal	2022-08-13 07:56:21	Finish	1	1	1	1	4	1	1	1	1	1	1	1	1	1	1	2	2	1	2	1
				Early pregnancy	Maternal mental health assessment	Self-rating Anxiety Scale (SAS)	24	2 min	normal	2022-08-13 08:29:39	Finish	1	1	1	1	1	1	1	2	1	2	1	1	1	1	1	1	2	2	1	1
				Early pregnancy	Maternal mental health assessment	Self-rating Anxiety Scale (SAS)	35	2 min	normal	2022-08-13 08:30:14	Finish	2	2	2	1	3	1	1	2	3	2	1	1	3	1	1	2	3	1	2	1
				Early pregnancy	Maternal mental health assessment	Self-rating Anxiety Scale (SAS)	25	1 min	normal	2022-08-13 08:30:52	Finish	2	1	1	1	4	1	1	1	1	1	1	1	1	1	2	1	1	1	1	1
				Early pregnancy	Maternal mental health assessment	Self-rating Anxiety Scale (SAS)	23	2 min	normal	2022-08-13 08:38:45	Finish	1	1	1	1	1	1	1	1	1	2	1	1	1	1	1	2	1	1	2	1
				Early pregnancy	Maternal mental health assessment	Self-rating Anxiety Scale (SAS)	39	3 min	normal	2022-08-13 08:38:49	Finish	2	2	2	2	3	2	1	3	2	1	1	2	2	1	2	3	2	2	2	2
				Early pregnancy	Maternal mental health assessment	Self-rating Anxiety Scale (SAS)	23	1 min	normal	2022-08-13 08:39:44	Finish	1	1	1	1	4	1	1	1	1	1	1	1	1	1	1	1	1	1	1	1
				Early pregnancy	Maternal mental health assessment	Self-rating Anxiety Scale (SAS)	35	1 min	normal	2022-08-13 08:45:11	Finish	1	1	1	1	4	1	1	1	4	1	1	1	4	1	1	1	4	1	4	1
				Early pregnancy	Maternal mental health assessment	Self-rating Anxiety Scale (SAS)	22	2 min	normal	2022-08-13 08:46:03	Finish	1	1	1	1	1	1	1	1	1	1	1	1	1	1	1	2	1	1	2	1
				Mid-pregnancy	Maternal mental health assessment	Self-rating Anxiety Scale (SAS)	38	2 min	normal	2022-08-13 08:49:15	Finish	2	1	1	1	2	2	2	3	2	1	3	2	2	1	2	4	3	1	2	1
				Early pregnancy	Maternal mental health assessment	Self-rating Anxiety Scale (SAS)	27	2 min	normal	2022-08-13 08:51:09	Finish	1	1	1	1	4	1	1	1	1	1	1	1	4	1	1	2	1	1	1	1
				Early pregnancy	Maternal mental health assessment	Self-rating Anxiety Scale (SAS)	24	2 min	normal	2022-08-13 08:57:06	Finish	1	1	1	1	1	1	1	1	1	2	1	1	1	1	1	1	2	1	3	1
				Early pregnancy	Maternal mental health assessment	Self-rating Anxiety Scale (SAS)	26	2 min	normal	2022-08-13 08:58:20	Finish	2	1	1	1	1	1	1	1	2	1	1	1	2	1	1	2	2	1	1	2
				Early pregnancy	Maternal mental health assessment	Self-rating Anxiety Scale (SAS)	35	2 min	normal	2022-08-13 09:05:09	Finish	2	1	1	1	4	1	1	1	4	1	1	1	4	1	1	2	2	3	2	1
				Early pregnancy	Maternal mental health assessment	Self-rating Anxiety Scale (SAS)	33	2 min	normal	2022-08-13 09:05:28	Finish	2	1	1	1	4	1	1	3	3	1	2	1	1	1	1	2	1	1	4	1
				Early pregnancy	Maternal mental health assessment	Self-rating Anxiety Scale (SAS)	32	3 min	normal	2022-08-13 09:08:08	Finish	1	1	2	1	2	1	2	3	2	2	1	1	1	1	1	2	2	1	2	3
				Early pregnancy	Maternal mental health assessment	Self-rating Anxiety Scale (SAS)	55	2 min	中度	2022-08-13 09:25:21	Finish	3	3	3	2	3	3	2	3	3	3	3	2	2	2	4	2	3	2	3	4
				Early pregnancy	Maternal mental health assessment	Self-rating Anxiety Scale (SAS)	31	3 min	normal	2022-08-13 09:30:40	Finish	1	1	2	1	1	1	1	1	4	2	2	1	3	1	2	1	1	1	2	2
				Early pregnancy	Maternal mental health assessment	Self-rating Anxiety Scale (SAS)	34	2 min	normal	2022-08-13 09:32:43	Finish	1	1	1	1	4	1	1	1	3	1	1	1	4	1	2	2	4	1	2	1
				Early pregnancy	Maternal mental health assessment	Self-rating Anxiety Scale (SAS)	50	7 min	mild	2022-08-13 09:35:12	Finish	2	2	2	2	3	2	3	3	3	3	2	2	2	2	4	3	2	3	2	3
				Early pregnancy	Maternal mental health assessment	Self-rating Anxiety Scale (SAS)	26	1 min	normal	2022-08-13 09:47:56	Finish	1	1	1	1	1	1	1	1	2	1	1	1	2	1	1	2	2	2	2	1
				Early pregnancy	Maternal mental health assessment	Self-rating Anxiety Scale (SAS)	20	1 min	normal	2022-08-13 09:49:40	Finish	1	1	1	1	1	1	1	1	1	1	1	1	1	1	1	1	1	1	1	1
				Early pregnancy	Maternal mental health assessment	Self-rating Anxiety Scale (SAS)	23	4 min	normal	2022-08-13 09:53:01	Finish	1	1	1	1	1	1	1	1	1	2	1	1	1	1	1	2	2	1	1	1
				Early pregnancy	Maternal mental health assessment	Self-rating Anxiety Scale (SAS)	36	2 min	normal	2022-08-13 09:54:33	Finish	2	1	2	2	3	1	1	1	4	1	1	1	4	1	1	2	3	1	2	2
				Early pregnancy	Maternal mental health assessment	Self-rating Anxiety Scale (SAS)	42	6 min	normal	2022-08-13 09:54:41	Finish	2	2	2	1	3	1	2	3	2	2	2	2	3	1	3	3	3	1	2	2
				3 days after delivery	Maternal mental health assessment	Self-rating Anxiety Scale (SAS)	20	2 min	normal	2022-08-13 09:57:03	Finish	1	1	1	1	1	1	1	1	1	1	1	1	1	1	1	1	1	1	1	1
				Early pregnancy	Maternal mental health assessment	Self-rating Anxiety Scale (SAS)	35	2 min	normal	2022-08-13 10:00:15	Finish	1	1	1	1	4	1	1	1	4	1	1	1	4	1	1	1	3	1	3	3
				Early pregnancy	Maternal mental health assessment	Self-rating Anxiety Scale (SAS)	25	4 min	normal	2022-08-13 10:01:22	Finish	1	1	1	1	3	1	1	1	1	1	1	1	1	1	1	3	2	1	1	1
				Early pregnancy	Maternal mental health assessment	Self-rating Anxiety Scale (SAS)	37	2 min	normal	2022-08-13 10:01:32	Finish	2	2	2	2	3	1	2	3	2	2	2	2	1	2	3	2	1	1	1	1
				Early pregnancy	Maternal mental health assessment	Self-rating Anxiety Scale (SAS)	31	1 min	normal	2022-08-13 10:04:20	Finish	1	1	1	1	4	1	1	1	3	2	1	1	4	1	1	2	2	1	1	1
				Early pregnancy	Maternal mental health assessment	Self-rating Anxiety Scale (SAS)	32	3 min	normal	2022-08-13 10:08:40	Finish	1	1	1	1	4	1	1	1	2	1	1	1	4	1	1	2	2	2	3	1
				Mid-pregnancy	Maternal mental health assessment	Self-rating Anxiety Scale (SAS)	37	2 min	normal	2022-08-13 10:09:09	Finish	1	2	1	1	2	1	2	3	2	1	3	2	2	2	2	3	2	2	2	1
				3 days after delivery	Maternal mental health assessment	Self-rating Anxiety Scale (SAS)	32	1 min	normal	2022-08-13 10:09:44	Finish	1	1	1	1	4	1	1	1	3	1	1	1	4	1	1	3	2	1	2	1
				Early pregnancy	Maternal mental health assessment	Self-rating Anxiety Scale (SAS)	36	17 min	normal	2022-08-13 10:12:20	Finish	1	1	1	1	4	1	1	2	2	2	1	2	1	1	2	3	3	2	3	2
				Early pregnancy	Maternal mental health assessment	Self-rating Anxiety Scale (SAS)	29	1 min	normal	2022-08-13 10:13:19	Finish	1	1	1	1	3	1	1	2	1	1	1	1	4	1	1	2	3	1	1	1
				Early pregnancy	Maternal mental health assessment	Self-rating Anxiety Scale (SAS)	26	2 min	normal	2022-08-13 10:24:27	Finish	1	1	1	1	4	1	1	1	2	2	1	1	1	1	1	1	1	2	1	1
				Mid-pregnancy	Maternal mental health assessment	Self-rating Anxiety Scale (SAS)	28	2 min	normal	2022-08-13 10:32:11	Finish	2	1	1	1	1	1	2	2	1	2	1	1	1	1	2	3	1	1	2	1
				Early pregnancy	Maternal mental health assessment	Self-rating Anxiety Scale (SAS)	42	2 min	normal	2022-08-13 10:40:54	Finish	1	2	1	1	4	1	3	2	4	1	2	2	4	2	2	4	1	1	3	1
				Mid-pregnancy	Maternal mental health assessment	Self-rating Anxiety Scale (SAS)	29	3 min	normal	2022-08-13 11:09:08	Finish	1	1	1	1	1	1	1	2	2	1	1	2	2	1	2	3	2	1	1	2
				Early pregnancy	Maternal mental health assessment	Self-rating Anxiety Scale (SAS)	28	1 min	normal	2022-08-13 11:09:56	Finish	1	1	1	1	2	1	1	1	2	1	1	1	2	1	2	2	2	1	3	1
				Early pregnancy	Maternal mental health assessment	Self-rating Anxiety Scale (SAS)	22	2 min	normal	2022-08-13 11:09:56	Finish	1	1	1	1	1	1	1	1	1	1	2	1	1	1	1	2	1	1	1	1
				Early pregnancy	Maternal mental health assessment	Self-rating Anxiety Scale (SAS)	33	13 min	normal	2022-08-13 11:35:28	Finish	1	1	1	1	4	1	2	2	1	2	2	1	2	1	2	2	1	2	2	2
				Early pregnancy	Maternal mental health assessment	Self-rating Anxiety Scale (SAS)	32	2 min	normal	2022-08-13 11:38:22	Finish	1	1	1	1	3	1	1	2	2	1	1	1	2	1	2	2	3	2	2	2
				Early pregnancy	Maternal mental health assessment	Self-rating Anxiety Scale (SAS)	32	2 min	normal	2022-08-13 11:40:05	Finish	1	1	1	1	4	1	1	1	1	1	1	1	4	1	1	1	4	1	4	1
				Early pregnancy	Maternal mental health assessment	Self-rating Anxiety Scale (SAS)	38	18 min	normal	2022-08-13 11:40:24	Finish	1	1	1	1	2	4	2	3	2	2	1	1	4	1	3	2	2	1	2	2
				Early pregnancy	Maternal mental health assessment	Self-rating Anxiety Scale (SAS)	32	3 min	normal	2022-08-13 11:45:23	Finish	2	1	2	1	2	1	2	1	2	1	2	2	4	1	2	1	1	1	1	2
				Postpartum 42 days	Maternal mental health assessment	Self-rating Anxiety Scale (SAS)	27	2 min	normal	2022-08-13 11:50:30	Finish	1	1	1	1	1	1	1	3	2	2	2	1	1	1	1	2	2	1	1	1
				Early pregnancy	Maternal mental health assessment	Self-rating Anxiety Scale (SAS)	36	3 min	normal	2022-08-13 12:16:58	Finish	2	1	1	1	4	1	1	3	2	2	2	1	1	1	3	3	3	1	2	1
				3 days after delivery	Maternal mental health assessment	Self-rating Anxiety Scale (SAS)	33	2 min	normal	2022-08-13 12:17:35	Finish	1	1	1	1	4	1	1	2	4	2	1	1	1	1	2	3	2	1	2	1
				Early pregnancy	Maternal mental health assessment	Self-rating Anxiety Scale (SAS)	30	2 min	normal	2022-08-13 12:26:09	Finish	1	1	1	1	4	1	1	1	4	1	1	1	2	1	1	2	2	1	2	1
				Early pregnancy	Maternal mental health assessment	Self-rating Anxiety Scale (SAS)	22	2 min	normal	2022-08-13 14:14:17	Finish	1	1	1	1	1	1	1	2	1	1	1	1	2	1	1	1	1	1	1	1
				Early pregnancy	Maternal mental health assessment	Self-rating Anxiety Scale (SAS)	31	2 min	normal	2022-08-13 15:02:29	Finish	2	1	1	1	2	1	2	1	2	1	1	2	1	1	2	3	2	2	2	1
				Early pregnancy	Maternal mental health assessment	Self-rating Anxiety Scale (SAS)	34	1 min	normal	2022-08-13 15:09:19	Finish	1	1	1	1	4	1	1	1	3	1	1	1	4	1	2	2	4	1	2	1
				Early pregnancy	Maternal mental health assessment	Self-rating Anxiety Scale (SAS)	28	2 min	normal	2022-08-13 15:14:33	Finish	1	1	1	1	4	1	1	1	2	1	1	1	1	1	4	2	1	1	1	1
				Early pregnancy	Maternal mental health assessment	Self-rating Anxiety Scale (SAS)	21	2 min	normal	2022-08-13 15:17:02	Finish	1	1	1	1	1	1	1	1	1	1	1	1	1	1	1	1	1	2	1	1
				Early pregnancy	Maternal mental health assessment	Self-rating Anxiety Scale (SAS)	34	2 min	normal	2022-08-13 15:24:58	Finish	1	1	1	1	4	1	1	2	2	1	1	1	2	1	2	2	4	2	2	2
				Mid-pregnancy	Maternal mental health assessment	Self-rating Anxiety Scale (SAS)	21	2 min	normal	2022-08-13 15:50:06	Finish	1	1	1	1	1	1	1	1	1	1	1	1	1	1	2	1	1	1	1	1
				Early pregnancy	Maternal mental health assessment	Self-rating Anxiety Scale (SAS)	35	3 min	normal	2022-08-13 16:28:51	Finish	3	1	2	2	3	1	1	3	3	1	2	1	1	1	1	1	2	1	3	2
				Early pregnancy	Maternal mental health assessment	Self-rating Anxiety Scale (SAS)	37	1 min	normal	2022-08-13 16:30:19	Finish	1	1	1	1	3	1	1	1	2	2	2	2	2	1	4	4	1	3	2	2
				3 days after delivery	Maternal mental health assessment	Self-rating Anxiety Scale (SAS)	24	2 min	normal	2022-08-14 09:15:17	Finish	1	1	1	1	1	1	1	1	2	1	1	1	1	1	1	3	1	1	2	1
				3 days after delivery	Maternal mental health assessment	Self-rating Anxiety Scale (SAS)	29	5 min	normal	2022-08-14 09:35:31	Finish	1	1	1	1	4	1	1	1	1	1	1	1	1	1	1	3	3	1	3	1
				3 days after delivery	Maternal mental health assessment	Self-rating Anxiety Scale (SAS)	27	2 min	normal	2022-08-14 09:38:32	Finish	2	1	1	1	2	1	1	2	2	1	1	1	1	1	1	2	1	1	2	2
				3 days after delivery	Maternal mental health assessment	Self-rating Anxiety Scale (SAS)	25	3 min	normal	2022-08-14 09:47:31	Finish	1	1	1	1	2	1	1	1	2	1	1	1	2	1	1	1	2	1	2	1
				3 days after delivery	Maternal mental health assessment	Self-rating Anxiety Scale (SAS)	29	2 min	normal	2022-08-14 11:03:04	Finish	1	2	1	1	4	1	1	1	4	1	1	1	1	1	1	2	1	1	2	1
				Early pregnancy	Maternal mental health assessment	Self-rating Anxiety Scale (SAS)	38	1 min	normal	2022-08-15 07:50:49	Finish	2	2	2	1	2	2	1	1	4	1	3	2	2	1	3	2	2	1	1	3
				Early pregnancy	Maternal mental health assessment	Self-rating Anxiety Scale (SAS)	28	2 min	normal	2022-08-15 08:00:43	Finish	1	1	1	1	2	1	1	3	1	2	1	1	1	1	2	3	1	1	1	2
				Early pregnancy	Maternal mental health assessment	Self-rating Anxiety Scale (SAS)	33	5 min	normal	2022-08-15 08:27:25	Finish	2	1	1	1	4	1	1	1	2	1	1	1	2	1	2	2	2	2	3	2
				Early pregnancy	Maternal mental health assessment	Self-rating Anxiety Scale (SAS)	42	2 min	normal	2022-08-15 08:38:22	Finish	2	1	2	2	4	1	2	1	2	2	2	2	3	1	2	3	4	1	3	2
				Early pregnancy	Maternal mental health assessment	Self-rating Anxiety Scale (SAS)	29	2 min	normal	2022-08-15 08:45:59	Finish	2	1	1	1	2	1	1	1	2	1	2	1	1	1	2	2	2	1	3	1
				Mid-pregnancy	Maternal mental health assessment	Self-rating Anxiety Scale (SAS)	43	2 min	mild	2022-08-15 08:59:56	Finish	2	1	2	1	4	1	2	2	3	2	2	2	2	2	3	3	2	2	3	2
				Early pregnancy	Maternal mental health assessment	Self-rating Anxiety Scale (SAS)	31	2 min	normal	2022-08-15 09:01:20	Finish	1	1	2	1	2	1	1	3	3	1	1	1	1	1	1	3	2	3	1	1
				Early pregnancy	Maternal mental health assessment	Self-rating Anxiety Scale (SAS)	43	2 min	mild	2022-08-15 09:05:46	Finish	2	2	2	1	3	2	2	2	2	3	2	2	3	1	3	2	4	2	2	1
				Early pregnancy	Maternal mental health assessment	Self-rating Anxiety Scale (SAS)	27	2 min	normal	2022-08-15 09:28:25	Finish	1	1	2	1	1	1	1	1	1	1	1	1	1	1	2	2	3	1	3	1
				3 days after delivery	Maternal mental health assessment	Self-rating Anxiety Scale (SAS)	24	3 min	normal	2022-08-15 09:28:43	Finish	1	1	1	1	2	1	1	2	1	1	1	1	1	1	1	1	1	1	2	2
				Early pregnancy	Maternal mental health assessment	Self-rating Anxiety Scale (SAS)	36	2 min	normal	2022-08-15 09:34:29	Finish	1	1	2	1	3	1	2	2	2	2	1	1	3	1	4	2	2	1	3	1
				3 days after delivery	Maternal mental health assessment	Self-rating Anxiety Scale (SAS)	26	3 min	normal	2022-08-15 09:44:45	Finish	1	1	1	1	1	1	1	1	1	1	1	2	1	1	2	2	4	1	1	1
				Early pregnancy	Maternal mental health assessment	Self-rating Anxiety Scale (SAS)	24	2 min	normal	2022-08-15 09:50:10	Finish	1	1	1	1	1	1	1	2	2	1	1	1	1	1	1	2	1	1	2	1
				Early pregnancy	Maternal mental health assessment	Self-rating Anxiety Scale (SAS)	26	2 min	normal	2022-08-15 10:19:20	Finish	1	1	1	1	1	1	1	1	1	2	1	1	1	1	3	3	1	1	1	2
				Early pregnancy	Maternal mental health assessment	Self-rating Anxiety Scale (SAS)	39	2 min	normal	2022-08-15 10:23:10	Finish	2	2	2	1	4	1	1	2	4	2	1	1	4	1	2	2	4	1	1	1
				Early pregnancy	Maternal mental health assessment	Self-rating Anxiety Scale (SAS)	31	1 min	normal	2022-08-15 10:24:53	Finish	1	1	1	1	4	1	1	1	3	2	1	1	1	1	1	4	1	1	3	1
				Early pregnancy	Maternal mental health assessment	Self-rating Anxiety Scale (SAS)	35	1 min	normal	2022-08-15 10:25:16	Finish	1	1	1	1	4	1	1	1	4	1	1	1	4	1	1	1	4	1	4	1
				Early pregnancy	Maternal mental health assessment	Self-rating Anxiety Scale (SAS)	30	1 min	normal	2022-08-15 10:34:24	Finish	1	1	1	1	4	1	1	1	2	1	1	1	4	1	1	2	2	1	2	1
				Early pregnancy	Maternal mental health assessment	Self-rating Anxiety Scale (SAS)	38	1 min	normal	2022-08-15 10:48:10	Finish	1	1	1	1	2	1	2	2	4	1	1	1	4	1	2	3	3	2	4	1
				Early pregnancy	Maternal mental health assessment	Self-rating Anxiety Scale (SAS)	40	6 min	normal	2022-08-15 10:50:03	Finish	2	2	2	1	1	1	2	2	2	3	2	2	2	2	3	2	2	2	3	2
				Early pregnancy	Maternal mental health assessment	Self-rating Anxiety Scale (SAS)	35	2 min	normal	2022-08-15 10:56:45	Finish	2	1	2	1	3	2	2	2	3	1	1	2	1	1	2	3	2	1	2	1
				Early pregnancy	Maternal mental health assessment	Self-rating Anxiety Scale (SAS)	43	2 min	mild	2022-08-15 11:14:38	Finish	2	2	2	2	3	1	2	3	3	2	2	2	2	2	3	2	2	2	2	2
				Early pregnancy	Maternal mental health assessment	Self-rating Anxiety Scale (SAS)	31	3 min	normal	2022-08-15 11:36:36	Finish	1	1	1	1	4	2	1	2	3	1	1	2	1	1	1	2	1	3	1	1
				Mid-pregnancy	Maternal mental health assessment	Self-rating Anxiety Scale (SAS)	26	2 min	normal	2022-08-15 11:42:48	Finish	1	1	1	1	2	1	1	1	1	2	1	1	1	1	1	2	2	1	2	2
				3 days after delivery	Maternal mental health assessment	Self-rating Anxiety Scale (SAS)	32	2 min	normal	2022-08-15 12:12:33	Finish	2	1	1	1	2	1	3	2	2	2	1	1	1	2	2	2	2	1	2	1
				Early pregnancy	Maternal mental health assessment	Self-rating Anxiety Scale (SAS)	27	3 min	normal	2022-08-15 12:25:33	Finish	1	1	1	1	1	1	1	1	2	1	1	1	1	2	2	4	2	1	1	1
				3 days after delivery	Maternal mental health assessment	Self-rating Anxiety Scale (SAS)	30	4 min	normal	2022-08-15 12:40:33	Finish	1	1	1	1	1	1	2	2	2	1	1	2	1	1	1	3	2	1	3	2
				3 days after delivery	Maternal mental health assessment	Self-rating Anxiety Scale (SAS)	29	3 min	normal	2022-08-15 12:51:11	Finish	1	1	2	1	1	1	1	2	2	3	1	1	1	2	1	2	2	1	2	1
				3 days after delivery	Maternal mental health assessment	Self-rating Anxiety Scale (SAS)	24	3 min	normal	2022-08-15 12:52:44	Finish	1	1	1	1	3	1	1	1	2	1	1	1	1	1	1	1	1	1	2	1
				Early pregnancy	Maternal mental health assessment	Self-rating Anxiety Scale (SAS)	33	2 min	normal	2022-08-15 13:37:32	Finish	1	1	1	1	1	1	2	2	2	2	2	2	2	1	3	3	2	1	2	1
				Early pregnancy	Maternal mental health assessment	Self-rating Anxiety Scale (SAS)	35	2 min	normal	2022-08-15 13:56:37	Finish	1	2	1	1	2	1	1	2	4	2	1	2	1	1	1	3	4	1	2	2
				Early pregnancy	Maternal mental health assessment	Self-rating Anxiety Scale (SAS)	31	2 min	normal	2022-08-15 14:12:38	Finish	1	1	1	1	4	1	1	1	2	1	1	1	2	1	3	3	1	1	3	1
				Early pregnancy	Maternal mental health assessment	Self-rating Anxiety Scale (SAS)	36	1 min	normal	2022-08-15 14:58:33	Finish	1	2	1	1	4	1	1	1	4	1	1	1	4	1	1	1	4	1	4	1
				3 days after delivery	Maternal mental health assessment	Self-rating Anxiety Scale (SAS)	20	8 min	normal	2022-08-15 21:21:34	Finish	1	1	1	1	1	1	1	1	1	1	1	1	1	1	1	1	1	1	1	1
				Early pregnancy	Maternal mental health assessment	Self-rating Anxiety Scale (SAS)	24	2 min	normal	2022-08-15 23:52:18	Finish	1	1	1	1	1	1	1	1	1	1	1	1	4	1	1	2	1	1	1	1
				Early pregnancy	Maternal mental health assessment	Self-rating Anxiety Scale (SAS)	23	1 min	normal	2022-08-16 07:40:12	Finish	1	1	1	1	1	1	1	1	1	1	1	1	1	1	1	3	2	1	1	1
				Early pregnancy	Maternal mental health assessment	Self-rating Anxiety Scale (SAS)	29	2 min	normal	2022-08-16 07:41:39	Finish	2	1	1	1	1	1	1	2	1	2	1	2	1	1	2	3	1	2	1	2
				Early pregnancy	Maternal mental health assessment	Self-rating Anxiety Scale (SAS)	27	3 min	normal	2022-08-16 08:00:57	Finish	1	1	1	1	1	1	1	1	4	1	1	1	1	1	2	3	1	1	1	2
				Early pregnancy	Maternal mental health assessment	Self-rating Anxiety Scale (SAS)	25	34 min	normal	2022-08-16 08:11:54	Finish	1	1	1	1	2	1	1	1	2	1	1	1	2	1	1	2	1	1	2	1
				3 days after delivery	Maternal mental health assessment	Self-rating Anxiety Scale (SAS)	38	2 min	normal	2022-08-16 08:16:39	Finish	2	2	2	2	3	1	1	2	3	1	1	1	4	1	1	2	3	1	3	2
				Early pregnancy	Maternal mental health assessment	Self-rating Anxiety Scale (SAS)	29	1 min	normal	2022-08-16 08:22:21	Finish	2	1	1	1	1	1	1	3	1	1	2	1	2	1	3	1	2	1	1	2
				Early pregnancy	Maternal mental health assessment	Self-rating Anxiety Scale (SAS)	32	4 min	normal	2022-08-16 08:25:34	Finish	1	1	1	1	2	1	1	2	2	2	1	1	3	1	2	2	3	1	3	1
				Early pregnancy	Maternal mental health assessment	Self-rating Anxiety Scale (SAS)	22	1 min	normal	2022-08-16 08:41:56	Finish	1	1	1	1	1	1	1	1	1	1	1	1	1	1	1	2	1	1	2	1
				3 days after delivery	Maternal mental health assessment	Self-rating Anxiety Scale (SAS)	23	2 min	normal	2022-08-16 09:05:30	Finish	1	1	1	1	1	1	1	1	2	1	1	1	1	1	1	2	2	1	1	1
				3 days after delivery	Maternal mental health assessment	Self-rating Anxiety Scale (SAS)	27	3 min	normal	2022-08-16 09:32:05	Finish	2	1	1	1	1	1	1	2	1	1	1	1	1	1	1	3	2	1	2	2
				3 days after delivery	Maternal mental health assessment	Self-rating Anxiety Scale (SAS)	27	10 min	normal	2022-08-16 09:32:37	Finish	1	1	1	1	2	1	1	1	2	2	1	1	1	1	1	2	2	2	2	1
				Early pregnancy	Maternal mental health assessment	Self-rating Anxiety Scale (SAS)	23	2 min	normal	2022-08-16 10:21:33	Finish	1	1	1	1	1	1	1	1	1	1	1	1	4	1	1	1	1	1	1	1
				Mid-pregnancy	Maternal mental health assessment	Self-rating Anxiety Scale (SAS)	31	2 min	normal	2022-08-16 10:31:37	Finish	2	2	2	1	1	1	1	2	2	1	2	2	1	1	2	2	1	1	3	1
				Early pregnancy	Maternal mental health assessment	Self-rating Anxiety Scale (SAS)	44	4 min	mild	2022-08-16 10:33:25	Finish	1	1	1	1	3	1	1	1	3	3	3	2	3	2	3	3	3	3	4	2
				Early pregnancy	Maternal mental health assessment	Self-rating Anxiety Scale (SAS)	32	2 min	normal	2022-08-16 10:34:57	Finish	1	1	1	1	4	1	2	2	1	1	2	1	1	1	3	3	2	1	2	1
				Mid-pregnancy	Maternal mental health assessment	Self-rating Anxiety Scale (SAS)	35	1 min	normal	2022-08-16 10:36:02	Finish	1	1	1	1	4	1	1	1	4	1	1	1	4	1	1	1	4	1	4	1
				Late pregnancy	Maternal mental health assessment	Self-rating Anxiety Scale (SAS)	53	1 min	中度	2022-08-16 10:38:05	Finish	3	3	3	2	3	3	2	2	3	3	2	3	2	2	3	3	2	3	4	2
				Early pregnancy	Maternal mental health assessment	Self-rating Anxiety Scale (SAS)	49	2 min	mild	2022-08-16 10:40:54	Finish	2	2	3	2	3	2	2	3	3	2	3	3	3	2	2	3	2	2	3	2
				Early pregnancy	Maternal mental health assessment	Self-rating Anxiety Scale (SAS)	34	2 min	normal	2022-08-16 10:47:36	Finish	1	1	1	1	2	1	2	2	2	1	2	2	2	2	2	3	2	2	2	1
				Mid-pregnancy	Maternal mental health assessment	Self-rating Anxiety Scale (SAS)	37	10 min	normal	2022-08-16 10:51:07	Finish	2	2	2	1	2	1	2	1	2	1	2	1	2	1	1	3	4	1	4	2
				3 days after delivery	Maternal mental health assessment	Self-rating Anxiety Scale (SAS)	33	2 min	normal	2022-08-16 11:00:00	Finish	1	2	1	1	1	1	2	2	2	1	2	2	1	2	2	3	2	2	2	1
				3 days after delivery	Maternal mental health assessment	Self-rating Anxiety Scale (SAS)	24	3 min	normal	2022-08-16 11:04:00	Finish	1	1	1	1	1	1	2	1	1	2	1	1	1	1	2	2	1	1	1	1
				Mid-pregnancy	Maternal mental health assessment	Self-rating Anxiety Scale (SAS)	37	2 min	normal	2022-08-16 11:31:41	Finish	1	2	1	1	4	1	1	2	4	1	1	1	4	1	2	2	4	1	2	1
				Early pregnancy	Maternal mental health assessment	Self-rating Anxiety Scale (SAS)	28	2 min	normal	2022-08-16 13:48:17	Finish	1	1	1	1	2	1	1	1	2	1	1	1	2	1	1	3	2	1	2	2
				Early pregnancy	Maternal mental health assessment	Self-rating Anxiety Scale (SAS)	31	2 min	normal	2022-08-16 13:51:55	Finish	2	2	1	1	2	1	1	2	2	2	2	1	1	1	2	1	2	1	2	2
				Late pregnancy	Maternal mental health assessment	Self-rating Anxiety Scale (SAS)	39	3 min	normal	2022-08-16 14:11:32	Finish	2	2	2	1	2	1	2	2	1	2	2	1	4	2	1	4	3	1	3	1
				Early pregnancy	Maternal mental health assessment	Self-rating Anxiety Scale (SAS)	35	2 min	normal	2022-08-16 14:13:11	Finish	2	1	1	1	4	1	1	1	3	1	1	1	4	1	1	1	4	1	4	1
				3 days after delivery	Maternal mental health assessment	Self-rating Anxiety Scale (SAS)	30	2 min	normal	2022-08-16 14:41:58	Finish	2	2	1	1	1	1	2	2	1	2	1	1	1	1	1	3	1	2	3	1
				Late pregnancy	Maternal mental health assessment	Self-rating Anxiety Scale (SAS)	29	1 min	normal	2022-08-16 14:45:23	Finish	1	1	1	1	1	1	2	1	2	2	1	2	2	1	2	3	2	1	1	1
				Early pregnancy	Maternal mental health assessment	Self-rating Anxiety Scale (SAS)	36	1 min	normal	2022-08-16 15:09:31	Finish	2	2	2	1	3	1	1	1	2	2	1	1	4	1	1	3	4	1	2	1
				Early pregnancy	Maternal mental health assessment	Self-rating Anxiety Scale (SAS)	32	2 min	normal	2022-08-17 07:56:58	Finish	1	1	1	1	4	1	2	1	4	1	1	1	1	1	1	2	2	3	2	1
				Early pregnancy	Maternal mental health assessment	Self-rating Anxiety Scale (SAS)	33	2 min	normal	2022-08-17 08:30:38	Finish	1	1	2	1	4	1	2	2	3	1	1	1	1	1	3	1	3	1	2	1
				Early pregnancy	Maternal mental health assessment	Self-rating Anxiety Scale (SAS)	33	48 min	normal	2022-08-17 08:41:28	Finish	2	1	1	1	4	2	1	1	2	1	3	1	1	1	2	3	1	1	3	1
				Early pregnancy	Maternal mental health assessment	Self-rating Anxiety Scale (SAS)	37	2 min	normal	2022-08-17 08:41:31	Finish	2	1	2	1	3	1	2	2	2	1	2	1	2	1	2	3	2	2	3	2
				Early pregnancy	Maternal mental health assessment	Self-rating Anxiety Scale (SAS)	21	2 min	normal	2022-08-17 09:06:10	Finish	1	1	1	1	1	1	1	1	1	1	1	1	1	1	2	1	1	1	1	1
				Early pregnancy	Maternal mental health assessment	Self-rating Anxiety Scale (SAS)	35	2 min	normal	2022-08-17 09:24:38	Finish	2	1	1	1	2	1	1	2	2	2	2	1	1	1	4	2	3	2	3	1
				Early pregnancy	Maternal mental health assessment	Self-rating Anxiety Scale (SAS)	21	2 min	normal	2022-08-17 09:27:18	Finish	1	1	1	1	1	1	2	1	1	1	1	1	1	1	1	1	1	1	1	1
				Early pregnancy	Maternal mental health assessment	Self-rating Anxiety Scale (SAS)	23	2 min	normal	2022-08-17 09:33:50	Finish	1	1	1	1	1	1	1	2	1	1	1	1	1	1	1	3	1	1	1	1
				Early pregnancy	Maternal mental health assessment	Self-rating Anxiety Scale (SAS)	30	36 min	normal	2022-08-17 09:37:59	Finish	1	1	1	1	1	1	1	3	2	1	1	2	1	1	1	2	4	1	2	2
				Early pregnancy	Maternal mental health assessment	Self-rating Anxiety Scale (SAS)	26	1 min	normal	2022-08-17 10:01:00	Finish	1	1	1	1	2	1	1	2	2	1	1	1	2	1	2	1	2	1	1	1
				Early pregnancy	Maternal mental health assessment	Self-rating Anxiety Scale (SAS)	21	2 min	normal	2022-08-17 10:02:11	Finish	1	1	1	1	1	1	1	1	1	2	1	1	1	1	1	1	1	1	1	1
				3 days after delivery	Maternal mental health assessment	Self-rating Anxiety Scale (SAS)	35	4 min	normal	2022-08-17 10:02:59	Finish	1	2	1	1	4	1	2	1	2	2	1	1	2	1	1	4	2	2	3	1
				Early pregnancy	Maternal mental health assessment	Self-rating Anxiety Scale (SAS)	44	2 min	mild	2022-08-17 10:05:37	Finish	2	1	1	1	4	1	2	2	4	4	2	2	4	1	2	2	4	1	2	2
				3 days after delivery	Maternal mental health assessment	Self-rating Anxiety Scale (SAS)	28	2 min	normal	2022-08-17 10:16:48	Finish	1	1	1	1	4	1	1	1	2	1	1	1	1	1	1	1	2	1	4	1
				3 days after delivery	Maternal mental health assessment	Self-rating Anxiety Scale (SAS)	29	3 min	normal	2022-08-17 10:23:02	Finish	1	1	1	1	4	2	2	1	1	1	1	1	1	1	1	2	1	1	3	2
				3 days after delivery	Maternal mental health assessment	Self-rating Anxiety Scale (SAS)	26	2 min	normal	2022-08-17 10:41:20	Finish	1	1	1	1	4	1	1	1	1	1	1	1	1	1	1	1	1	4	1	1
				Early pregnancy	Maternal mental health assessment	Self-rating Anxiety Scale (SAS)	45	4 min	mild	2022-08-17 10:41:37	Finish	2	2	2	2	1	3	2	3	2	3	3	2	1	1	2	4	3	2	3	2
				3 days after delivery	Maternal mental health assessment	Self-rating Anxiety Scale (SAS)	20	2 min	normal	2022-08-17 11:02:06	Finish	1	1	1	1	1	1	1	1	1	1	1	1	1	1	1	1	1	1	1	1
				Mid-pregnancy	Maternal mental health assessment	Self-rating Anxiety Scale (SAS)	34	2 min	normal	2022-08-17 11:10:03	Finish	2	2	2	2	3	1	1	2	2	2	1	1	2	1	1	1	1	1	4	2
				Early pregnancy	Maternal mental health assessment	Self-rating Anxiety Scale (SAS)	39	4 min	normal	2022-08-17 11:28:42	Finish	2	2	2	2	4	2	1	2	2	1	2	1	4	1	1	1	4	1	3	1
				Early pregnancy	Maternal mental health assessment	Self-rating Anxiety Scale (SAS)	33	3 min	normal	2022-08-17 11:34:15	Finish	1	1	1	1	2	1	1	2	3	1	1	1	1	2	2	3	2	1	4	2
				Mid-pregnancy	Maternal mental health assessment	Self-rating Anxiety Scale (SAS)	25	3 min	normal	2022-08-17 11:51:30	Finish	1	1	1	1	2	1	1	1	1	2	1	1	2	1	1	1	3	1	1	1
				Early pregnancy	Maternal mental health assessment	Self-rating Anxiety Scale (SAS)	32	202 min	normal	2022-08-17 13:57:44	Finish	2	1	1	1	4	1	1	1	2	1	1	1	4	1	1	1	4	1	2	1
				Early pregnancy	Maternal mental health assessment	Self-rating Anxiety Scale (SAS)	27	2 min	normal	2022-08-17 14:07:25	Finish	1	1	1	1	1	1	1	2	1	2	2	1	1	1	3	2	1	1	1	2
				Early pregnancy	Maternal mental health assessment	Self-rating Anxiety Scale (SAS)	26	2 min	normal	2022-08-17 14:29:05	Finish	1	1	1	1	1	1	1	1	1	1	1	1	2	1	2	3	2	1	2	1
				Early pregnancy	Maternal mental health assessment	Self-rating Anxiety Scale (SAS)	23	2 min	normal	2022-08-17 14:44:38	Finish	1	1	1	1	2	1	1	1	1	1	1	1	1	1	1	2	2	1	1	1
				3 days after delivery	Maternal mental health assessment	Self-rating Anxiety Scale (SAS)	33	4 min	normal	2022-08-17 15:18:42	Finish	1	1	1	1	4	1	1	1	2	1	1	1	4	1	1	1	4	1	2	3
[truncated: 11,045 more rows]
