# Supplementary material for: Psychological distress and pregnancy outcomes in early-stage gestational hypertension: a case-control study from China
Source: PeerJ journal article supplement (doi:10.7717/peerj.19574), 2025-06-20
Supplement: SummaryData.xlsx [file SummaryData.xlsx]

## Sheet: Sheet1
Table 1	Table 2	Table 4	Table 5
Control Group (200 cases)	TOTAL Anxiety Group (107 cases 93+14)	GH-Anxiety Group (93 cases)	Pregnancy Complications
Age: mean age 29.52 years, standard deviation 2.69 years.	Age:
BMI: mean 22.63, standard deviation 3.02	≤35 years: 81 cases	Age: mean age 29.53 years, standard deviation 3.87 years.	Preterm birth: The Anxiety group had 19 cases, while the non-Anxiety group had 43 cases. Chi-square test showed χ² = 4.538, P = 0.033, indicating a significant difference.
Education level:	35 years: 26 cases	Pre-pregnancy BMI: mean BMI 22.38 kg/m², standard deviation 3.23 kg/m².	Polyhydramnios: The Anxiety group had 13 cases, while the non-Anxiety group had 38 cases. Chi-square test showed χ² = 0.775, P = 0.379, indicating no significant difference.
High school/vocational school or below: 38 cases.	Education level:	Systolic blood pressure: mean blood pressure 152.37 mmHg, standard deviation 34.79 mmHg.	Premature rupture of membranes: The Anxiety group had 22 cases, while the non-Anxiety group had 51 cases. Chi-square test showed χ² = 4.497, P = 0.034, indicating no significant difference.
Junior college or above: 162 cases.	High school/vocational school or below: 30 cases	Diastolic blood pressure: mean blood pressure 105.78 mmHg, standard deviation 16.57 mmHg.	Preeclampsia: The Anxiety group had 23 cases, while the non-Anxiety group had 45 cases. Chi-square test showed χ² = 8.334, P = 0.004, indicating a significant difference.
Occupation:	Junior college or above: 77 cases	Education level:	Postpartum hemorrhage: The Anxiety group had 11 cases, while the non-Anxiety group had 16 cases. Chi-square test showed χ² = 6.888, P = 0.009, indicating a significant difference.
Employed: 142 cases.	Pre-pregnancy BMI:	High school/vocational school: 18 cases	Cesarean section: The Anxiety group had 42 cases, while the non-Anxiety group had 173 cases. Chi-square test showed χ² = 0.430, P = 0.512, indicating no significant difference.
Unemployed: 58 cases.	≤25 kg/m²: 85 cases	Junior college or above: 75 cases
Parity:		Occupation:	Perinatal Outcomes
Primipara: 162 cases.	25 kg/m²: 22 cases	Employed: 65 cases
Multipara: 38 cases.	Occupation:	Unemployed: 28 cases	Fetal distress: The Anxiety group had 9 cases, while the non-Anxiety group had 19 cases. Chi-square test showed χ² = 2.307, P = 0.129, indicating no significant difference.
Family history of hypertension:	Employed: 81 cases	Parity:	Neonatal infection: The Anxiety group had 10 cases, while the non-Anxiety group had 11 cases. Chi-square test showed χ² = 9.231, P = 0.002, indicating no significant difference.
Yes: 2 cases.	Unemployed: 26 cases	Primipara: 69 cases	Macrosomia: The Anxiety group had 6 cases, while the non-Anxiety group had 3 cases. Chi-square test showed χ² = 8.478, P = 0.004, indicating no significant difference.
No: 198 cases.	Parity:	Multipara: 24 cases	Low birth weight: The Anxiety group had 9 cases, while the non-Anxiety group had 14 cases. Chi-square test showed χ² = 4.883, P = 0.027, indicating a significant difference.
	Primipara: 88 cases	Family history of hypertension:
Psychological Distress	Multipara: 19 cases	Yes: 2 cases	Conclusion
Yes: 14 cases.	Adverse pregnancy history:	No: 91 cases
No: 186 cases.	Yes: 33 cases		The Anxiety group had a significantly higher incidence of preterm birth and preeclampsia compared to the non-Anxiety group, suggesting that Anxiety may be related to these pregnancy complications.
	No: 74 cases	GH Non-Anxiety Group (353 cases)	Premature rupture of membranes,Postpartum hemorrhage was also more common in the Anxiety group.
	Combined pregnancy-induced hypertension:		Neonatal infection, macrosomia, and low birth weight was more common in the Anxiety group.
Pregnancy-induced Hypertension Group (446 cases)	Yes: 93 cases	Age: mean age 29.82 years, standard deviation 3.52 years.	Polyhydramnios, cesarean section, and fetal distress did not differ significantly between the two groups.
Age: mean age 30.57 years, standard deviation 8.09 years.	No: 14 cases	Pre-pregnancy BMI: mean BMI 21.86 kg/m², standard deviation 3.53 kg/m².	This study suggests that Anxiety during pregnancy may be associated with an increased risk of preterm birth, preeclampsia, postpartum hemorrhage, and low birth weight. However, further research is needed to confirm these findings and to explore the underlying mechanisms.
BMI: mean 21.84, standard deviation 6.81	Combined thyroid disease:	Systolic blood pressure: mean blood pressure 141.65 mmHg, standard deviation 28.63 mmHg.
	Yes: 15 cases	Diastolic blood pressure: mean blood pressure 85.76 mmHg, standard deviation 15.98 mmHg.
Education level:	No: 92 cases	Education level:
High school/vocational school or below: 80 cases.	Family history of hypertension:	High school/vocational school: 62 cases
Junior college or above: 366 cases.	Yes: 1 case	Junior college or above: 291 cases
	No: 106 cases	Occupation:
Occupation:		Employed: 269 cases
Employed: 334 cases.	TOTAL Non-Anxiety Group (539 cases)	Unemployed: 84 cases
Unemployed: 112 cases.		Parity:
Parity:	Age:	Primipara: 274 cases
Primipara: 343 cases.	≤35 years: 425 cases	Multipara: 79 cases
Multipara: 103 cases.	35 years: 114 cases	Family history of hypertension:
Family history of hypertension:		Yes: 4 cases
Yes: 6 cases.	Education level:	No: 349 cases
No: 440 cases.	High school/vocational school or below: 88 cases
	Junior college or above: 451 cases	Statistical Test Results
Psychological Distress	Pre-pregnancy BMI:
Yes: 93 cases.	≤25 kg/m²: 450 cases	Age: t-test, t = 0.660, P = 0.510 (not significant)
No: 353 cases.	25 kg/m²: 89 cases	Pre-pregnancy BMI: t-test, t = 1.360, P = 0.175 (not significant)
		Systolic blood pressure: t-test, t = 2.740, P = 0.006 (significant)
	Occupation:	Diastolic blood pressure: t-test, t = 10.440, P = 0.000 (significant)
	Employed: 395 cases	Education level: chi-square test, χ2 = 0.160, P = 0.688 (not significant)
	Unemployed: 144 cases	Occupation: chi-square test, χ2 = 1.559, P = 0.211 (not significant)
	Parity:	Parity: chi-square test, χ2 = 0.313, P = 0.580 (not significant)
	Primipara: 417 cases	Family history of hypertension: chi-square test, χ2 = 0.063, P = 0.801 (approaching significance)
	Multipara: 122 cases
	Adverse pregnancy history:	Conclusion
	Yes: 103 cases
	No: 436 cases	The Anxiety group had significantly higher systolic and diastolic blood pressures than the non-Anxiety group (P < 0.05), suggesting that hypertension may be a risk factor for Anxiety.
	Combined pregnancy-induced hypertension:	Age and pre-pregnancy BMI did not differ significantly between the two groups.
	Yes: 353 cases	Education level, occupation, parity, and family history of hypertension did not differ significantly or approached significance between the two groups, requiring further analysis to determine their relationship with Anxiety.
	No: 186 cases
	Combined thyroid disease:
	Yes: 38 cases
	No: 501 cases
	Family history of hypertension:
	Yes: 7 cases
	No: 532 cases
	Chi-Square Test Results
	Age: χ2 = 0.353, P = 0.553
	Education level: χ2 = 7.44, P = 0.006
	Pre-pregnancy BMI: χ2 = 0.764, P = 0.382
	Occupation: χ2 = 0.159, P = 0.690
	Parity: χ2 = 0.975, P = 0.323
	Adverse pregnancy history: χ2 = 6.704, P = 0.010
	Combined pregnancy-induced hypertension: χ2 = 198.182, P = 0.000
	Combined thyroid disease: χ2 =4.86, P = 0.027
	Family history of hypertension: χ2 = 0.000, P = 1.000
	Conclusion
	Women with lower education levels (high school/vocational school or below) had a significantly higher incidence of Anxiety than those with higher education levels (P = 0.006).
	Women with combined pregnancy-induced hypertension had a significantly higher incidence of Anxiety than those without combined pregnancy-induced hypertension (P = 0.000).
	Women with combined thyroid disease had a significantly higher incidence of Anxiety than those without combined thyroid disease (P = 0.027).
	Other factors (age, pre-pregnancy BMI, occupation, parity, adverse pregnancy history, and family history of hypertension) did not have a significant correlation with the incidence of Anxiety.
